# Supplementary material for: Updated Virophage Taxonomy and Distinction from Polinton-like Viruses
Source: Biomolecules. 2023 Jan 19;13(2):204. doi: 10.3390/biom13020204 (PMC9952930; doi:10.3390/biom13020204)
Supplement: Supplementary file 1 [file biomolecules-13-00204-s001.zip]

Archive with 5 entries (5 files):
- Virophage_Supplementary_Figures 1-17_Nov.pdf
- Virophage_Table_S1.xlsx
- Virophage_Table_S2.xlsx
- Virophage_Table_S3.xlsx
- Virophage_Table_S4.xlsx
