# Supplementary material for: Updated Virophage Taxonomy and Distinction from Polinton-like Viruses
Source: Biomolecules. 2023 Jan 19;13(2):204. doi: 10.3390/biom13020204 (PMC9952930; doi:10.3390/biom13020204)
Supplement: Supplementary file 1 [file biomolecules-13-00204-s001.zip › Virophage_Table_S1.xlsx]

## Sheet: Base_tableS1
Genome Abbreviated ID	Genome full ID	Source dataset	Dataset type	Dataset ID	Genome topology	Genome length	ANI clustering status	ANI cluster	Predicted completeness	List of virophage marker genes	gwAAI group	MCP tree group	Blast-based affiliation	Dataset publication doi (or other comparable reference)	Proposal doi (for JGI datasets)
EMALE01_Cflag_017B	Cflag_017B	Hackl_2021	Protist genome	Cflag_017B	Integrated	21311	Seed	EMALE01_Cflag_017B	Complete	ATPase MCP Penton PRO	Group 006	Mavirus virophages	Maveriviricetes;Lavidavirales;Maviroviridae	10.7554/eLife.72674
EMALE03_RCC970_016A	RCC970_016A	Hackl_2021	Protist genome	RCC970_016A	Integrated	19438	Seed	EMALE03_RCC970_016A	Complete	ATPase MCP Penton PRO	Group 006	Mavirus virophages	Maveriviricetes;Lavidavirales;Maviroviridae	10.7554/eLife.72674
EMALE04_BVI_055B	BVI_055B	Hackl_2021	Protist genome	BVI_055B	Integrated	19849	Seed	EMALE04_BVI_055B	Complete	ATPase MCP Penton PRO	Group 006	Mavirus virophages	Maveriviricetes;Lavidavirales;Maviroviridae	10.7554/eLife.72674
EMALE05_BVI_001A	BVI_001A	Hackl_2021	Protist genome	BVI_001A	Integrated	18827	Seed	EMALE05_BVI_001A	Complete	ATPase MCP Penton PRO	Group 006	Mavirus virophages	Maveriviricetes;Lavidavirales;Maviroviridae	10.7554/eLife.72674
EMALE06_BVI_058	BVI_058	Hackl_2021	Protist genome	BVI_058	Integrated	18948	Seed	EMALE06_BVI_058	Complete	ATPase MCP Penton PRO	Group 006	Mavirus virophages	Maveriviricetes;Lavidavirales;Maviroviridae	10.7554/eLife.72674
EMALE07_E4-10_001	E4-10_001	Hackl_2021	Protist genome	E4-10_001	Integrated	32655	Seed	EMALE07_E4-10_001	Complete	ATPase MCP Penton PRO	Group 006	Mavirus virophages	Maveriviricetes;Lavidavirales;Maviroviridae	10.7554/eLife.72674
IMG_VR_0005	DTR_578695	IMG_VR v3	Metagenome	CheckV database	DTR	32287	Seed	IMG_VR_0005	Complete	ATPase MCP Penton PRO	Group 001	Aquatic virophages 1	Maveriviricetes;Priklausovirales;Omnilimnoviroviridae	10.1038/s41587-020-00774-7 10.1093/nar/gkaa946
IMG_VR_0006	DTR_891052	IMG_VR v3	Metagenome	CheckV database	DTR	26671	Clustered	IMG_VR_1554	NA	NA	NA	NA	NA	10.1038/s41587-020-00774-7 10.1093/nar/gkaa946
IMG_VR_0007	GCA_002630865.1	IMG_VR v3	Metagenome	CheckV database	DTR	26421	Clustered	Organic_Lake_virophage	NA	NA	NA	NA	NA	10.1073/pnas.1018221108 10.1093/nar/gkaa946
IMG_VR_0008	GCA_003006235.2	IMG_VR v3	Isolate	CheckV database	DTR	17327	Clustered	Zamilon_virus_isolate_Z.vigne	NA	NA	NA	NA	NA	10.1038/s41396-019-0565-y 10.1093/nar/gkaa946
IMG_VR_0015	IMGVR_UViG_3300000117_003134|3300000117|DelMOWin2010_c10011288	IMG_VR v3	Metagenome	3300000117	Linear	5026	Seed	IMG_VR_0015	Partial	MCP Penton PRO	NA	NA	Maveriviricetes;Unclassified	10.1093/nar/gkaa946 10.1128/mSystems.01020-20	10.46936/10.25585/60007339
IMG_VR_0016	IMGVR_UViG_3300000176_000463|3300000176|TB03JUN2009E_c000648	IMG_VR v3	Metagenome	3300000176	Linear	9800	Clustered	IMG_VR_0035	NA	NA	NA	NA	NA	10.1038/ismej.2015.241 10.1093/nar/gkaa946 10.7717/peerj.6075	10.46936/10.25585/60000533
IMG_VR_0017	IMGVR_UViG_3300000176_000464|3300000176|TB03JUN2009E_c000721	IMG_VR v3	Metagenome	3300000176	Linear	9214	Clustered	IMG_VR_0024	NA	NA	NA	NA	NA	10.1038/ismej.2015.241 10.1093/nar/gkaa946 10.7717/peerj.6075	10.46936/10.25585/60000533
IMG_VR_0018	IMGVR_UViG_3300000203_000342|3300000203|TB18AUG2009E_c000314	IMG_VR v3	Metagenome	3300000203	Linear	9799	Clustered	IMG_VR_0021	NA	NA	NA	NA	NA	10.1038/ismej.2015.241 10.1093/nar/gkaa946 10.7717/peerj.6075	10.46936/10.25585/60000533
IMG_VR_0019	IMGVR_UViG_3300000313_000028|3300000313|WSSedB1CaDRAFT_10000817	IMG_VR v3	Metagenome	3300000313	Linear	12744	Seed	IMG_VR_0019	Partial	ATPase MCP Penton PRO	NA	NA	Maveriviricetes;Unclassified	10.1093/nar/gkaa946 10.1128/mBio.00066-15	10.46936/10.25585/60001414
IMG_VR_0021	IMGVR_UViG_3300000439_001169|3300000439|TBL_comb48_EPIDRAFT_1000887	IMG_VR v3	Metagenome	3300000439	Linear	22946	Seed	IMG_VR_0021	Partial	ATPase MCP Penton PRO	NA	NA	Maveriviricetes;Priklausovirales;Burtonviroviridae	10.1038/ismej.2015.241 10.1093/nar/gkaa946 10.7717/peerj.6075
IMG_VR_0022	IMGVR_UViG_3300000439_001170|3300000439|TBL_comb48_EPIDRAFT_1001087	IMG_VR v3	Metagenome	3300000439	Linear	20549	Clustered	IMG_VR_1118	NA	NA	NA	NA	NA	10.1038/ismej.2015.241 10.1093/nar/gkaa946 10.7717/peerj.6075
IMG_VR_0023	IMGVR_UViG_3300000439_001171|3300000439|TBL_comb48_EPIDRAFT_1001871	IMG_VR v3	Metagenome	3300000439	DTR	14947	Seed	IMG_VR_0023	Complete	ATPase MCP Penton PRO	Group 002	Sputnik virophages	Maveriviricetes;Mividavirales;Sputniviroviridae	10.1038/ismej.2015.241 10.1093/nar/gkaa946 10.7717/peerj.6075
IMG_VR_0024	IMGVR_UViG_3300000439_001172|3300000439|TBL_comb48_EPIDRAFT_1002136	IMG_VR v3	Metagenome	3300000439	Linear	13909	Seed	IMG_VR_0024	Partial	MCP Penton PRO	NA	NA	Maveriviricetes;Priklausovirales;Burtonviroviridae	10.1038/ismej.2015.241 10.1093/nar/gkaa946 10.7717/peerj.6075
IMG_VR_0025	IMGVR_UViG_3300000439_001173|3300000439|TBL_comb48_EPIDRAFT_1004812	IMG_VR v3	Metagenome	3300000439	Linear	8475	Clustered	IMG_VR_1117	NA	NA	NA	NA	NA	10.1038/ismej.2015.241 10.1093/nar/gkaa946 10.7717/peerj.6075
IMG_VR_0026	IMGVR_UViG_3300000439_001175|3300000439|TBL_comb48_EPIDRAFT_1006087	IMG_VR v3	Metagenome	3300000439	Linear	7275	Clustered	IMG_VR_0283	NA	NA	NA	NA	NA	10.1038/ismej.2015.241 10.1093/nar/gkaa946 10.7717/peerj.6075
IMG_VR_0027	IMGVR_UViG_3300000502_000009|3300000502|M590M2_1000447	IMG_VR v3	Metagenome	3300000502	Linear	6899	Seed	IMG_VR_0027	Partial	ATPase MCP Penton PRO	NA	NA	Maveriviricetes;Unclassified	10.1093/nar/gkaa946 10.1186/s40168-019-0768-5
IMG_VR_0028	IMGVR_UViG_3300000502_000010|3300000502|M590M2_1002211	IMG_VR v3	Metagenome	3300000502	Linear	7565	Seed	IMG_VR_0028	Partial	ATPase MCP Penton PRO	NA	NA	Maveriviricetes;Unclassified	10.1093/nar/gkaa946 10.1186/s40168-019-0768-5
IMG_VR_0029	IMGVR_UViG_3300000502_000011|3300000502|M590M2_1006461	IMG_VR v3	Metagenome	3300000502	Linear	18023	Seed	IMG_VR_0029	Partial	ATPase MCP Penton PRO	NA	NA	Maveriviricetes;Unclassified	10.1093/nar/gkaa946 10.1186/s40168-019-0768-5
IMG_VR_0030	IMGVR_UViG_3300000502_000012|3300000502|M590M2_1009725	IMG_VR v3	Metagenome	3300000502	Linear	6886	Seed	IMG_VR_0030	Partial	ATPase MCP PRO	NA	NA	Maveriviricetes;Unclassified	10.1093/nar/gkaa946 10.1186/s40168-019-0768-5
IMG_VR_0032	IMGVR_UViG_3300000553_001483|3300000553|TBL_comb47_HYPODRAFT_10002641	IMG_VR v3	Metagenome	3300000553	Linear	21931	Seed	IMG_VR_0032	Partial	ATPase MCP Penton PRO	NA	NA	Maveriviricetes;Unclassified	10.1038/ismej.2015.241 10.1093/nar/gkaa946 10.1186/s40168-019-0768-5 10.7717/peerj.6075
IMG_VR_0033	IMGVR_UViG_3300000553_001484|3300000553|TBL_comb47_HYPODRAFT_10002729	IMG_VR v3	Metagenome	3300000553	Linear	21538	Seed	IMG_VR_0033	Partial	ATPase MCP Penton PRO	NA	NA	Maveriviricetes;Priklausovirales;Burtonviroviridae	10.1038/ismej.2015.241 10.1093/nar/gkaa946 10.1186/s40168-019-0768-5 10.7717/peerj.6075
IMG_VR_0034	IMGVR_UViG_3300000553_001485|3300000553|TBL_comb47_HYPODRAFT_10004977	IMG_VR v3	Metagenome	3300000553	DTR	14947	Clustered	IMG_VR_0023	NA	NA	NA	NA	NA	10.1038/ismej.2015.241 10.1093/nar/gkaa946 10.1186/s40168-019-0768-5 10.7717/peerj.6075
IMG_VR_0035	IMGVR_UViG_3300000553_001486|3300000553|TBL_comb47_HYPODRAFT_10005622	IMG_VR v3	Metagenome	3300000553	Linear	13905	Seed	IMG_VR_0035	Partial	ATPase MCP Penton PRO	NA	NA	Maveriviricetes;Unclassified	10.1038/ismej.2015.241 10.1093/nar/gkaa946 10.1186/s40168-019-0768-5 10.7717/peerj.6075
IMG_VR_0036	IMGVR_UViG_3300000553_001487|3300000553|TBL_comb47_HYPODRAFT_10005660	IMG_VR v3	Metagenome	3300000553	Linear	13842	Seed	IMG_VR_0036	Partial	ATPase MCP Penton PRO	NA	NA	Maveriviricetes;Unclassified	10.1038/ismej.2015.241 10.1093/nar/gkaa946 10.1186/s40168-019-0768-5 10.7717/peerj.6075
IMG_VR_0037	IMGVR_UViG_3300000553_001488|3300000553|TBL_comb47_HYPODRAFT_10006230	IMG_VR v3	Metagenome	3300000553	Linear	12949	Seed	IMG_VR_0037	Partial	MCP Penton PRO	NA	NA	Maveriviricetes;Priklausovirales;Gulliviroviridae	10.1038/ismej.2015.241 10.1093/nar/gkaa946 10.1186/s40168-019-0768-5 10.7717/peerj.6075
IMG_VR_0038	IMGVR_UViG_3300000553_001489|3300000553|TBL_comb47_HYPODRAFT_10007071	IMG_VR v3	Metagenome	3300000553	Linear	11920	Seed	IMG_VR_0038	Partial	ATPase MCP Penton PRO	NA	NA	Maveriviricetes;Unclassified	10.1038/ismej.2015.241 10.1093/nar/gkaa946 10.1186/s40168-019-0768-5 10.7717/peerj.6075
IMG_VR_0039	IMGVR_UViG_3300000553_001491|3300000553|TBL_comb47_HYPODRAFT_10008145	IMG_VR v3	Metagenome	3300000553	Linear	10805	Clustered	IMG_VR_0024	NA	NA	NA	NA	NA	10.1038/ismej.2015.241 10.1093/nar/gkaa946 10.1186/s40168-019-0768-5 10.7717/peerj.6075
IMG_VR_0040	IMGVR_UViG_3300000553_001492|3300000553|TBL_comb47_HYPODRAFT_10009724	IMG_VR v3	Metagenome	3300000553	Linear	9543	Seed	IMG_VR_0040	Partial	MCP Penton PRO	NA	NA	Maveriviricetes;Priklausovirales;Gulliviroviridae	10.1038/ismej.2015.241 10.1093/nar/gkaa946 10.1186/s40168-019-0768-5 10.7717/peerj.6075
IMG_VR_0043	IMGVR_UViG_3300001213_000229|3300001213|JGIcombinedJ13530_100223357	IMG_VR v3	Metagenome	3300001213	Linear	6080	Seed	IMG_VR_0043	Partial	ATPase MCP Penton PRO	NA	NA	Maveriviricetes;Mividavirales;Sputniviroviridae	10.1093/nar/gkaa946 10.1128/mBio.00066-15	10.46936/10.25585/60001414
IMG_VR_0045	IMGVR_UViG_3300001282_000520|3300001282|B570J14230_10000209	IMG_VR v3	Metagenome	3300001282	Linear	22032	Clustered	IMG_VR_0102	NA	NA	NA	NA	NA	10.1093/nar/gkaa946	10.46936/10.25585/60000533
IMG_VR_0046	IMGVR_UViG_3300001336_000050|3300001336|ML7_10001506	IMG_VR v3	Metagenome	3300001336	Linear	22572	Seed	IMG_VR_0046	Partial	ATPase MCP Penton PRO	NA	NA	Maveriviricetes;Priklausovirales;Omnilimnoviroviridae	10.1093/nar/gkaa946
IMG_VR_0048	IMGVR_UViG_3300001419_000980|3300001419|JGI11705J14877_10006351	IMG_VR v3	Metagenome	3300001419	Linear	5577	Clustered	PE_027	NA	NA	NA	NA	NA	10.1093/nar/gkaa946	10.46936/10.25585/60007508
IMG_VR_0049	IMGVR_UViG_3300001450_003596|3300001450|JGI24006J15134_10004681	IMG_VR v3	Metagenome	3300001450	Linear	7198	Seed	IMG_VR_0049	Partial	ATPase MCP Penton PRO	NA	NA	Maveriviricetes;Mividavirales;Sputniviroviridae	10.1093/nar/gkaa946	10.46936/10.25585/60007217
IMG_VR_0050	IMGVR_UViG_3300001450_003597|3300001450|JGI24006J15134_10005275	IMG_VR v3	Metagenome	3300001450	Linear	6750	Seed	IMG_VR_0050	Partial	MCP Penton PRO	NA	NA	Maveriviricetes;Mividavirales;Sputniviroviridae	10.1093/nar/gkaa946	10.46936/10.25585/60007217
IMG_VR_0052	IMGVR_UViG_3300001605_001400|3300001605|Draft_10001555	IMG_VR v3	Metagenome	3300001605	Linear	30393	Seed	IMG_VR_0052	Near-complete	ATPase MCP Penton PRO	NA	NA	Maveriviricetes;Unclassified	10.1021/es4020184 10.1093/nar/gkaa946 10.1186/s40168-019-0768-5
IMG_VR_0053	IMGVR_UViG_3300001605_001401|3300001605|Draft_10006620	IMG_VR v3	Metagenome	3300001605	Linear	12935	Seed	IMG_VR_0053	Partial	MCP Penton PRO	NA	NA	Maveriviricetes;Priklausovirales;Burtonviroviridae	10.1021/es4020184 10.1093/nar/gkaa946 10.1186/s40168-019-0768-5
IMG_VR_0054	IMGVR_UViG_3300001605_001402|3300001605|Draft_10009362	IMG_VR v3	Metagenome	3300001605	Linear	10452	Seed	IMG_VR_0054	Partial	ATPase MCP Penton PRO	NA	NA	Maveriviricetes;Unclassified	10.1021/es4020184 10.1093/nar/gkaa946 10.1186/s40168-019-0768-5
IMG_VR_0056	IMGVR_UViG_3300001798_000036|3300001798|JGI24126J20157_1000438	IMG_VR v3	Metagenome	3300001798	Linear	15931	Clustered	MAG_Nitrosarchaeum_sp._isolate_CROMO_BS_83_3_0_c_000000707256	NA	NA	NA	NA	NA	10.1093/nar/gkaa946 10.1186/s40168-019-0768-5	10.46936/10.25585/60007411
IMG_VR_0058	IMGVR_UViG_3300002091_000566|3300002091|JGI24028J26656_1000152	IMG_VR v3	Metagenome	3300002091	DTR	29217	Seed	IMG_VR_0058	Complete	ATPase MCP Penton PRO	Group 003	Aquatic virophages 2	Maveriviricetes;Priklausovirales;Burtonviroviridae	10.1093/nar/gkaa946 10.1128/mSphere.00202-18 10.1186/s40168-019-0768-5	10.46936/10.25585/60000619
IMG_VR_0059	IMGVR_UViG_3300002091_000567|3300002091|JGI24028J26656_1000154	IMG_VR v3	Metagenome	3300002091	Linear	29963	Seed	IMG_VR_0059	Near-complete	ATPase MCP Penton PRO	Group 003	Aquatic virophages 2	Maveriviricetes;Priklausovirales;Burtonviroviridae	10.1093/nar/gkaa946 10.1128/mSphere.00202-18 10.1186/s40168-019-0768-5	10.46936/10.25585/60000619
IMG_VR_0060	IMGVR_UViG_3300002091_000569|3300002091|JGI24028J26656_1000405	IMG_VR v3	Metagenome	3300002091	Linear	14242	Clustered	IMG_VR_0077	NA	NA	NA	NA	NA	10.1093/nar/gkaa946 10.1128/mSphere.00202-18 10.1186/s40168-019-0768-5	10.46936/10.25585/60000619
IMG_VR_0061	IMGVR_UViG_3300002091_000570|3300002091|JGI24028J26656_1000582	IMG_VR v3	Metagenome	3300002091	Linear	10660	Seed	IMG_VR_0061	Partial	MCP Penton PRO	NA	NA	Maveriviricetes;Priklausovirales;Burtonviroviridae	10.1093/nar/gkaa946 10.1128/mSphere.00202-18 10.1186/s40168-019-0768-5	10.46936/10.25585/60000619
IMG_VR_0062	IMGVR_UViG_3300002091_000572|3300002091|JGI24028J26656_1001022	IMG_VR v3	Metagenome	3300002091	Linear	6945	Seed	IMG_VR_0062	Partial	MCP Penton PRO	NA	NA	Maveriviricetes;Priklausovirales;Burtonviroviridae	10.1093/nar/gkaa946 10.1128/mSphere.00202-18 10.1186/s40168-019-0768-5	10.46936/10.25585/60000619
IMG_VR_0063	IMGVR_UViG_3300002091_000574|3300002091|JGI24028J26656_1001493	IMG_VR v3	Metagenome	3300002091	Linear	5156	Clustered	IMG_VR_0065	NA	NA	NA	NA	NA	10.1093/nar/gkaa946 10.1128/mSphere.00202-18 10.1186/s40168-019-0768-5	10.46936/10.25585/60000619
IMG_VR_0064	IMGVR_UViG_3300002092_000812|3300002092|JGI24218J26658_1000290	IMG_VR v3	Metagenome	3300002092	ITR	29392	Seed	IMG_VR_0064	Complete	ATPase MCP Penton PRO	Group 001	Aquatic virophages 1	Maveriviricetes;Priklausovirales;Omnilimnoviroviridae	10.1093/nar/gkaa946 10.1128/mSphere.00202-18 10.1186/s40168-019-0768-5	10.46936/10.25585/60000619
IMG_VR_0065	IMGVR_UViG_3300002092_000813|3300002092|JGI24218J26658_1000335	IMG_VR v3	Metagenome	3300002092	Linear	26263	Seed	IMG_VR_0065	Near-complete	ATPase MCP Penton PRO	Group 003	Aquatic virophages 2	Maveriviricetes;Priklausovirales;Burtonviroviridae	10.1093/nar/gkaa946 10.1128/mSphere.00202-18 10.1186/s40168-019-0768-5	10.46936/10.25585/60000619
IMG_VR_0066	IMGVR_UViG_3300002092_000814|3300002092|JGI24218J26658_1000336	IMG_VR v3	Metagenome	3300002092	Linear	26203	Clustered	IMG_VR_0086	NA	NA	NA	NA	NA	10.1093/nar/gkaa946 10.1128/mSphere.00202-18 10.1186/s40168-019-0768-5	10.46936/10.25585/60000619
IMG_VR_0067	IMGVR_UViG_3300002092_000816|3300002092|JGI24218J26658_1000683	IMG_VR v3	Metagenome	3300002092	Linear	14413	Clustered	IMG_VR_0059	NA	NA	NA	NA	NA	10.1093/nar/gkaa946 10.1128/mSphere.00202-18 10.1186/s40168-019-0768-5	10.46936/10.25585/60000619
IMG_VR_0068	IMGVR_UViG_3300002092_000817|3300002092|JGI24218J26658_1000692	IMG_VR v3	Metagenome	3300002092	Linear	14246	Clustered	IMG_VR_0077	NA	NA	NA	NA	NA	10.1093/nar/gkaa946 10.1128/mSphere.00202-18 10.1186/s40168-019-0768-5	10.46936/10.25585/60000619
IMG_VR_0069	IMGVR_UViG_3300002092_000818|3300002092|JGI24218J26658_1000731	IMG_VR v3	Metagenome	3300002092	Linear	13427	Clustered	PE_022	NA	NA	NA	NA	NA	10.1093/nar/gkaa946 10.1128/mSphere.00202-18 10.1186/s40168-019-0768-5	10.46936/10.25585/60000619
IMG_VR_0070	IMGVR_UViG_3300002092_000819|3300002092|JGI24218J26658_1000946	IMG_VR v3	Metagenome	3300002092	Linear	10660	Clustered	IMG_VR_0061	NA	NA	NA	NA	NA	10.1093/nar/gkaa946 10.1128/mSphere.00202-18 10.1186/s40168-019-0768-5	10.46936/10.25585/60000619
IMG_VR_0071	IMGVR_UViG_3300002092_000820|3300002092|JGI24218J26658_1001675	IMG_VR v3	Metagenome	3300002092	Linear	6445	Seed	IMG_VR_0071	Partial	MCP Penton PRO	NA	NA	Maveriviricetes;Unclassified	10.1093/nar/gkaa946 10.1128/mSphere.00202-18 10.1186/s40168-019-0768-5	10.46936/10.25585/60000619
IMG_VR_0072	IMGVR_UViG_3300002092_000821|3300002092|JGI24218J26658_1001868	IMG_VR v3	Metagenome	3300002092	Linear	5901	Seed	IMG_VR_0072	Partial	ATPase MCP Penton	NA	NA	Maveriviricetes;Priklausovirales;Dishuiviroviridae	10.1093/nar/gkaa946 10.1128/mSphere.00202-18 10.1186/s40168-019-0768-5	10.46936/10.25585/60000619
IMG_VR_0073	IMGVR_UViG_3300002092_000822|3300002092|JGI24218J26658_1002068	IMG_VR v3	Metagenome	3300002092	Linear	5463	Clustered	IMG_VR_0283	NA	NA	NA	NA	NA	10.1093/nar/gkaa946 10.1128/mSphere.00202-18 10.1186/s40168-019-0768-5	10.46936/10.25585/60000619
IMG_VR_0074	IMGVR_UViG_3300002098_000759|3300002098|JGI24219J26650_1000215	IMG_VR v3	Metagenome	3300002098	Linear	29963	Clustered	IMG_VR_0059	NA	NA	NA	NA	NA	10.1093/nar/gkaa946 10.1128/mSphere.00202-18 10.1186/s40168-019-0768-5	10.46936/10.25585/60000619
IMG_VR_0075	IMGVR_UViG_3300002098_000760|3300002098|JGI24219J26650_1000248	IMG_VR v3	Metagenome	3300002098	Linear	26367	Clustered	IMG_VR_0086	NA	NA	NA	NA	NA	10.1093/nar/gkaa946 10.1128/mSphere.00202-18 10.1186/s40168-019-0768-5	10.46936/10.25585/60000619
IMG_VR_0076	IMGVR_UViG_3300002098_000761|3300002098|JGI24219J26650_1000491	IMG_VR v3	Metagenome	3300002098	Linear	16193	Seed	IMG_VR_0076	Partial	ATPase MCP Penton PRO	NA	NA	Maveriviricetes;Unclassified	10.1093/nar/gkaa946 10.1128/mSphere.00202-18 10.1186/s40168-019-0768-5	10.46936/10.25585/60000619
IMG_VR_0077	IMGVR_UViG_3300002098_000763|3300002098|JGI24219J26650_1000581	IMG_VR v3	Metagenome	3300002098	Linear	14247	Seed	IMG_VR_0077	Partial	ATPase MCP Penton PRO	NA	NA	Maveriviricetes;Unclassified	10.1093/nar/gkaa946 10.1128/mSphere.00202-18 10.1186/s40168-019-0768-5	10.46936/10.25585/60000619
IMG_VR_0078	IMGVR_UViG_3300002098_000764|3300002098|JGI24219J26650_1001487	IMG_VR v3	Metagenome	3300002098	Linear	7035	Seed	IMG_VR_0078	Partial	MCP Penton PRO	NA	NA	Maveriviricetes;Priklausovirales;Dishuiviroviridae	10.1093/nar/gkaa946 10.1128/mSphere.00202-18 10.1186/s40168-019-0768-5	10.46936/10.25585/60000619
IMG_VR_0079	IMGVR_UViG_3300002220_001459|3300002220|MLSBCLC_10154717	IMG_VR v3	Metagenome	3300002220	Linear	10346	Seed	IMG_VR_0079	Partial	ATPase MCP Penton	NA	NA	Maveriviricetes;Priklausovirales;Burtonviroviridae	10.1021/es4020184 10.1093/nar/gkaa946
IMG_VR_0080	IMGVR_UViG_3300002272_000021|3300002272|B570J29579_100079	IMG_VR v3	Metagenome	3300002272	Linear	16097	Clustered	IMG_VR_0102	NA	NA	NA	NA	NA	10.1093/nar/gkaa946 10.7717/peerj.6075	10.46936/10.25585/60000533
IMG_VR_0081	IMGVR_UViG_3300002301_000242|3300002301|JGI24891J29808_1000555	IMG_VR v3	Metagenome	3300002301	Linear	17982	Clustered	IMG_VR_0059	NA	NA	NA	NA	NA	10.1093/nar/gkaa946 10.1128/mSphere.00202-18	10.46936/10.25585/60000619
IMG_VR_0082	IMGVR_UViG_3300002301_000243|3300002301|JGI24891J29808_1000717	IMG_VR v3	Metagenome	3300002301	Linear	12591	Seed	IMG_VR_0082	Partial	MCP Penton PRO	NA	NA	Maveriviricetes;Priklausovirales;Burtonviroviridae	10.1093/nar/gkaa946 10.1128/mSphere.00202-18	10.46936/10.25585/60000619
IMG_VR_0083	IMGVR_UViG_3300002301_000244|3300002301|JGI24891J29808_1000957	IMG_VR v3	Metagenome	3300002301	Linear	7886	Seed	IMG_VR_0083	Partial	MCP Penton PRO	NA	NA	Maveriviricetes;Priklausovirales;Gulliviroviridae	10.1093/nar/gkaa946 10.1128/mSphere.00202-18	10.46936/10.25585/60000619
IMG_VR_0084	IMGVR_UViG_3300002307_000984|3300002307|JGI24890J29729_1000225	IMG_VR v3	Metagenome	3300002307	Concatemer	23742	Clustered	PE_020	NA	NA	NA	NA	NA	10.1093/nar/gkaa946 10.1128/mSphere.00202-18 10.1186/s40168-019-0768-5	10.46936/10.25585/60000619
IMG_VR_0085	IMGVR_UViG_3300002307_000985|3300002307|JGI24890J29729_1000388	IMG_VR v3	Metagenome	3300002307	Linear	29212	Clustered	IMG_VR_0064	NA	NA	NA	NA	NA	10.1093/nar/gkaa946 10.1128/mSphere.00202-18 10.1186/s40168-019-0768-5	10.46936/10.25585/60000619
IMG_VR_0086	IMGVR_UViG_3300002307_000986|3300002307|JGI24890J29729_1000442	IMG_VR v3	Metagenome	3300002307	Linear	26375	Seed	IMG_VR_0086	Near-complete	ATPase MCP Penton PRO	Group 004	SW01 virophages	Maveriviricetes;Priklausovirales;Dishuiviroviridae	10.1093/nar/gkaa946 10.1128/mSphere.00202-18 10.1186/s40168-019-0768-5	10.46936/10.25585/60000619
IMG_VR_0087	IMGVR_UViG_3300002307_000987|3300002307|JGI24890J29729_1000451	IMG_VR v3	Metagenome	3300002307	DTR	26050	Clustered	PE_022	NA	NA	NA	NA	NA	10.1093/nar/gkaa946 10.1128/mSphere.00202-18 10.1186/s40168-019-0768-5	10.46936/10.25585/60000619
IMG_VR_0088	IMGVR_UViG_3300002307_000988|3300002307|JGI24890J29729_1000626	IMG_VR v3	Metagenome	3300002307	Linear	20771	Seed	IMG_VR_0088	Partial	ATPase MCP Penton PRO	NA	NA	Maveriviricetes;Priklausovirales;Gulliviroviridae	10.1093/nar/gkaa946 10.1128/mSphere.00202-18 10.1186/s40168-019-0768-5	10.46936/10.25585/60000619
IMG_VR_0089	IMGVR_UViG_3300002307_000989|3300002307|JGI24890J29729_1000627	IMG_VR v3	Metagenome	3300002307	Linear	20761	Seed	IMG_VR_0089	Partial	ATPase MCP Penton PRO	NA	NA	Maveriviricetes;Unclassified	10.1093/nar/gkaa946 10.1128/mSphere.00202-18 10.1186/s40168-019-0768-5	10.46936/10.25585/60000619
IMG_VR_0090	IMGVR_UViG_3300002307_000990|3300002307|JGI24890J29729_1000652	IMG_VR v3	Metagenome	3300002307	Linear	20233	Seed	IMG_VR_0090	Partial	ATPase MCP Penton PRO	NA	NA	Maveriviricetes;Priklausovirales;Omnilimnoviroviridae	10.1093/nar/gkaa946 10.1128/mSphere.00202-18 10.1186/s40168-019-0768-5	10.46936/10.25585/60000619
IMG_VR_0091	IMGVR_UViG_3300002307_000991|3300002307|JGI24890J29729_1000712	IMG_VR v3	Metagenome	3300002307	Linear	18899	Seed	IMG_VR_0091	Partial	ATPase MCP Penton PRO	NA	NA	Maveriviricetes;Priklausovirales;Gulliviroviridae	10.1093/nar/gkaa946 10.1128/mSphere.00202-18 10.1186/s40168-019-0768-5	10.46936/10.25585/60000619
IMG_VR_0092	IMGVR_UViG_3300002307_000992|3300002307|JGI24890J29729_1000980	IMG_VR v3	Metagenome	3300002307	Linear	14413	Clustered	IMG_VR_0059	NA	NA	NA	NA	NA	10.1093/nar/gkaa946 10.1128/mSphere.00202-18 10.1186/s40168-019-0768-5	10.46936/10.25585/60000619
IMG_VR_0093	IMGVR_UViG_3300002307_000993|3300002307|JGI24890J29729_1000994	IMG_VR v3	Metagenome	3300002307	Linear	14238	Clustered	IMG_VR_0077	NA	NA	NA	NA	NA	10.1093/nar/gkaa946 10.1128/mSphere.00202-18 10.1186/s40168-019-0768-5	10.46936/10.25585/60000619
IMG_VR_0094	IMGVR_UViG_3300002307_000994|3300002307|JGI24890J29729_1001704	IMG_VR v3	Metagenome	3300002307	Linear	9319	Clustered	IMG_VR_0679	NA	NA	NA	NA	NA	10.1093/nar/gkaa946 10.1128/mSphere.00202-18 10.1186/s40168-019-0768-5	10.46936/10.25585/60000619
IMG_VR_0095	IMGVR_UViG_3300002307_000995|3300002307|JGI24890J29729_1001896	IMG_VR v3	Metagenome	3300002307	Linear	8587	Seed	IMG_VR_0095	Partial	ATPase MCP Penton PRO	NA	NA	Maveriviricetes;Priklausovirales;Burtonviroviridae	10.1093/nar/gkaa946 10.1128/mSphere.00202-18 10.1186/s40168-019-0768-5	10.46936/10.25585/60000619
IMG_VR_0096	IMGVR_UViG_3300002307_000996|3300002307|JGI24890J29729_1002257	IMG_VR v3	Metagenome	3300002307	Linear	7488	Seed	IMG_VR_0096	Partial	MCP Penton PRO	NA	NA	Maveriviricetes;Priklausovirales;Burtonviroviridae	10.1093/nar/gkaa946 10.1128/mSphere.00202-18 10.1186/s40168-019-0768-5	10.46936/10.25585/60000619
IMG_VR_0097	IMGVR_UViG_3300002307_000997|3300002307|JGI24890J29729_1002557	IMG_VR v3	Metagenome	3300002307	Linear	6791	Seed	IMG_VR_0097	Partial	MCP Penton PRO	NA	NA	Maveriviricetes;Priklausovirales;Burtonviroviridae	10.1093/nar/gkaa946 10.1128/mSphere.00202-18 10.1186/s40168-019-0768-5	10.46936/10.25585/60000619
IMG_VR_0098	IMGVR_UViG_3300002307_000998|3300002307|JGI24890J29729_1002880	IMG_VR v3	Metagenome	3300002307	Linear	6226	Clustered	IMG_VR_0071	NA	NA	NA	NA	NA	10.1093/nar/gkaa946 10.1128/mSphere.00202-18 10.1186/s40168-019-0768-5	10.46936/10.25585/60000619
IMG_VR_0100	IMGVR_UViG_3300002641_002081|3300002641|loc_105131763	IMG_VR v3	Metagenome	3300002641	Linear	7218	Clustered	RV_AUXO017923253.1	NA	NA	NA	NA	NA	10.1093/nar/gkaa946	10.46936/10.25585/60007430
IMG_VR_0101	IMGVR_UViG_3300002835_004335|3300002835|B570J40625_100003451	IMG_VR v3	Metagenome	3300002835	Linear	29610	Seed	IMG_VR_0101	Near-complete	ATPase MCP Penton PRO	Group 004	SW01 virophages	Maveriviricetes;Priklausovirales;Dishuiviroviridae	10.1093/nar/gkaa946 10.1186/s40168-019-0768-5 10.7717/peerj.6075	10.46936/10.25585/60000533
IMG_VR_0102	IMGVR_UViG_3300002835_004336|3300002835|B570J40625_100004419	IMG_VR v3	Metagenome	3300002835	DTR	25756	Seed	IMG_VR_0102	Complete	ATPase MCP Penton PRO	Group 004	SW01 virophages	Maveriviricetes;Priklausovirales;Dishuiviroviridae	10.1093/nar/gkaa946 10.1186/s40168-019-0768-5 10.7717/peerj.6075	10.46936/10.25585/60000533
IMG_VR_0103	IMGVR_UViG_3300002835_004337|3300002835|B570J40625_100004931	IMG_VR v3	Metagenome	3300002835	Linear	24917	Seed	IMG_VR_0103	Partial	ATPase MCP Penton PRO	NA	NA	Maveriviricetes;Priklausovirales;Dishuiviroviridae	10.1093/nar/gkaa946 10.1186/s40168-019-0768-5 10.7717/peerj.6075	10.46936/10.25585/60000533
IMG_VR_0104	IMGVR_UViG_3300002835_004338|3300002835|B570J40625_100005612	IMG_VR v3	Metagenome	3300002835	DTR	22900	Seed	IMG_VR_0104	Complete	ATPase MCP Penton PRO	Group 004	NA	Maveriviricetes;Unclassified	10.1093/nar/gkaa946 10.1186/s40168-019-0768-5 10.7717/peerj.6075	10.46936/10.25585/60000533
IMG_VR_0105	IMGVR_UViG_3300002835_004339|3300002835|B570J40625_100005780	IMG_VR v3	Metagenome	3300002835	Linear	23012	Seed	IMG_VR_0105	Near-complete	ATPase MCP Penton PRO	Group 002	Sputnik virophages	Maveriviricetes;Mividavirales;Sputniviroviridae	10.1093/nar/gkaa946 10.1186/s40168-019-0768-5 10.7717/peerj.6075	10.46936/10.25585/60000533
IMG_VR_0106	IMGVR_UViG_3300002835_004340|3300002835|B570J40625_100006212	IMG_VR v3	Metagenome	3300002835	Linear	22196	Seed	IMG_VR_0106	Near-complete	ATPase MCP Penton PRO	Group 004	NA	Maveriviricetes;Unclassified	10.1093/nar/gkaa946 10.1186/s40168-019-0768-5 10.7717/peerj.6075	10.46936/10.25585/60000533
IMG_VR_0107	IMGVR_UViG_3300002835_004341|3300002835|B570J40625_100006411	IMG_VR v3	Metagenome	3300002835	DTR	20751	Seed	IMG_VR_0107	Complete	ATPase MCP Penton PRO	NA	NA	Maveriviricetes;Unclassified	10.1093/nar/gkaa946 10.1186/s40168-019-0768-5 10.7717/peerj.6075	10.46936/10.25585/60000533
IMG_VR_0108	IMGVR_UViG_3300002835_004342|3300002835|B570J40625_100006412	IMG_VR v3	Metagenome	3300002835	Linear	21805	Clustered	IMG_VR_0101	NA	NA	NA	NA	NA	10.1093/nar/gkaa946 10.1186/s40168-019-0768-5 10.7717/peerj.6075	10.46936/10.25585/60000533
IMG_VR_0109	IMGVR_UViG_3300002835_004344|3300002835|B570J40625_100026948	IMG_VR v3	Metagenome	3300002835	Linear	9285	Seed	IMG_VR_0109	Partial	MCP Penton PRO	NA	NA	Maveriviricetes;Unclassified	10.1093/nar/gkaa946 10.1186/s40168-019-0768-5 10.7717/peerj.6075	10.46936/10.25585/60000533
IMG_VR_0110	IMGVR_UViG_3300002835_004345|3300002835|B570J40625_100045837	IMG_VR v3	Metagenome	3300002835	Linear	6363	Seed	IMG_VR_0110	Partial	MCP Penton PRO	NA	NA	Maveriviricetes;Unclassified	10.1093/nar/gkaa946 10.1186/s40168-019-0768-5 10.7717/peerj.6075	10.46936/10.25585/60000533
IMG_VR_0111	IMGVR_UViG_3300002933_000344|3300002933|G310J44882_10001402	IMG_VR v3	Metagenome	3300002933	Linear	10743	Clustered	IMG_VR_0036	NA	NA	NA	NA	NA	10.1038/ismej.2015.241 10.1093/nar/gkaa946 10.7717/peerj.6075	10.46936/10.25585/60000533
IMG_VR_0112	IMGVR_UViG_3300002933_000345|3300002933|G310J44882_10001544	IMG_VR v3	Metagenome	3300002933	Linear	10120	Clustered	IMG_VR_0033	NA	NA	NA	NA	NA	10.1038/ismej.2015.241 10.1093/nar/gkaa946 10.7717/peerj.6075	10.46936/10.25585/60000533
IMG_VR_0113	IMGVR_UViG_3300002933_000347|3300002933|G310J44882_10002876	IMG_VR v3	Metagenome	3300002933	Linear	6805	Clustered	IMG_VR_0283	NA	NA	NA	NA	NA	10.1038/ismej.2015.241 10.1093/nar/gkaa946 10.7717/peerj.6075	10.46936/10.25585/60000533
IMG_VR_0114	IMGVR_UViG_3300003375_000849|3300003375|JGI26470J50227_1000268	IMG_VR v3	Metagenome	3300003375	Linear	22961	Clustered	IMG_VR_1118	NA	NA	NA	NA	NA	10.1093/nar/gkaa946 10.1128/mSphere.00202-18 10.1186/s40168-019-0768-5	10.46936/10.25585/60000619
IMG_VR_0115	IMGVR_UViG_3300003375_000850|3300003375|JGI26470J50227_1000762	IMG_VR v3	Metagenome	3300003375	Linear	12477	Seed	IMG_VR_0115	Partial	ATPase MCP Penton	NA	NA	Maveriviricetes;Priklausovirales;Dishuiviroviridae	10.1093/nar/gkaa946 10.1128/mSphere.00202-18 10.1186/s40168-019-0768-5	10.46936/10.25585/60000619
IMG_VR_0116	IMGVR_UViG_3300003375_000852|3300003375|JGI26470J50227_1000911	IMG_VR v3	Metagenome	3300003375	Linear	11159	Clustered	IMG_VR_0303	NA	NA	NA	NA	NA	10.1093/nar/gkaa946 10.1128/mSphere.00202-18 10.1186/s40168-019-0768-5	10.46936/10.25585/60000619
IMG_VR_0117	IMGVR_UViG_3300003375_000854|3300003375|JGI26470J50227_1001111	IMG_VR v3	Metagenome	3300003375	Linear	9825	Seed	IMG_VR_0117	Partial	ATPase MCP Penton PRO	NA	NA	Maveriviricetes;Priklausovirales;Burtonviroviridae	10.1093/nar/gkaa946 10.1128/mSphere.00202-18 10.1186/s40168-019-0768-5	10.46936/10.25585/60000619
IMG_VR_0118	IMGVR_UViG_3300003375_000855|3300003375|JGI26470J50227_1001184	IMG_VR v3	Metagenome	3300003375	Linear	9516	Clustered	IMG_VR_0032	NA	NA	NA	NA	NA	10.1093/nar/gkaa946 10.1128/mSphere.00202-18 10.1186/s40168-019-0768-5	10.46936/10.25585/60000619
IMG_VR_0119	IMGVR_UViG_3300003375_000856|3300003375|JGI26470J50227_1001717	IMG_VR v3	Metagenome	3300003375	Linear	7537	Clustered	IMG_VR_0985	NA	NA	NA	NA	NA	10.1093/nar/gkaa946 10.1128/mSphere.00202-18 10.1186/s40168-019-0768-5	10.46936/10.25585/60000619
IMG_VR_0120	IMGVR_UViG_3300003375_000858|3300003375|JGI26470J50227_1002679	IMG_VR v3	Metagenome	3300003375	Linear	5619	Seed	IMG_VR_0120	Partial	ATPase MCP Penton PRO	NA	NA	Maveriviricetes;Unclassified	10.1093/nar/gkaa946 10.1128/mSphere.00202-18 10.1186/s40168-019-0768-5	10.46936/10.25585/60000619
IMG_VR_0121	IMGVR_UViG_3300003375_000861|3300003375|JGI26470J50227_1003079	IMG_VR v3	Metagenome	3300003375	Linear	5141	Clustered	IMG_VR_0611	NA	NA	NA	NA	NA	10.1093/nar/gkaa946 10.1128/mSphere.00202-18 10.1186/s40168-019-0768-5	10.46936/10.25585/60000619
IMG_VR_0122	IMGVR_UViG_3300003404_000296|3300003404|JGI25920J50251_10003170	IMG_VR v3	Metagenome	3300003404	Linear	5916	Clustered	IMG_VR_1252	NA	NA	NA	NA	NA	10.1093/nar/gkaa946 10.1128/AEM.00140-20	10.46936/10.25585/60000744
IMG_VR_0123	IMGVR_UViG_3300003413_000270|3300003413|JGI25922J50271_10000494	IMG_VR v3	Metagenome	3300003413	Linear	11653	Clustered	IMG_VR_1297	NA	NA	NA	NA	NA	10.1093/nar/gkaa946 10.1128/AEM.00140-20	10.46936/10.25585/60000744
IMG_VR_0126	IMGVR_UViG_3300003465_000053|3300003465|P52013CM_1004042	IMG_VR v3	Metagenome	3300003465	Linear	15705	Seed	IMG_VR_0126	Partial	ATPase MCP Penton PRO	NA	NA	Maveriviricetes;Mividavirales;Sputniviroviridae	10.1093/nar/gkaa946
IMG_VR_0129	IMGVR_UViG_3300003757_000024|3300003757|Ga0041910_1002229	IMG_VR v3	Metagenome	3300003757	Linear	14013	Clustered	IMG_VR_1033	NA	NA	NA	NA	NA	10.1021/acs.est.6b04477 10.1093/nar/gkaa946 10.1111/1462-2920.12936	10.46936/10.25585/60000685
IMG_VR_0130	IMGVR_UViG_3300003757_000025|3300003757|Ga0041910_1004259	IMG_VR v3	Metagenome	3300003757	Linear	6873	Clustered	IMG_VR_0448	NA	NA	NA	NA	NA	10.1021/acs.est.6b04477 10.1093/nar/gkaa946 10.1111/1462-2920.12936	10.46936/10.25585/60000685
IMG_VR_0131	IMGVR_UViG_3300003785_000038|3300003785|Ga0007851_100001	IMG_VR v3	Metagenome	3300003785	Concatemer	26599	Clustered	IMG_VR_0265	NA	NA	NA	NA	NA	10.1093/nar/gkaa946 10.1186/s40168-019-0768-5	10.46936/10.25585/60000543
IMG_VR_0132	IMGVR_UViG_3300003793_000030|3300003793|Ga0007847_100004	IMG_VR v3	Metagenome	3300003793	Linear	26918	Clustered	IMG_VR_0265	NA	NA	NA	NA	NA	10.1093/nar/gkaa946	10.46936/10.25585/60000543
IMG_VR_0133	IMGVR_UViG_3300003793_000032|3300003793|Ga0007847_100171	IMG_VR v3	Metagenome	3300003793	Linear	5784	Clustered	IMG_VR_1175	NA	NA	NA	NA	NA	10.1093/nar/gkaa946	10.46936/10.25585/60000543
IMG_VR_0134	IMGVR_UViG_3300003796_000148|3300003796|Ga0007865_1000241	IMG_VR v3	Metagenome	3300003796	Linear	9279	Clustered	IMG_VR_0236	NA	NA	NA	NA	NA	10.1093/nar/gkaa946	10.46936/10.25585/60000543
IMG_VR_0135	IMGVR_UViG_3300003803_000030|3300003803|Ga0007849_1000002	IMG_VR v3	Metagenome	3300003803	Concatemer	26599	Clustered	IMG_VR_0265	NA	NA	NA	NA	NA	10.1093/nar/gkaa946	10.46936/10.25585/60000543
IMG_VR_0136	IMGVR_UViG_3300003812_000143|3300003812|Ga0007861_1000028	IMG_VR v3	Metagenome	3300003812	Linear	16796	Clustered	IMG_VR_0283	NA	NA	NA	NA	NA	10.1093/nar/gkaa946	10.46936/10.25585/60000543
IMG_VR_0137	IMGVR_UViG_3300003812_000144|3300003812|Ga0007861_1000096	IMG_VR v3	Metagenome	3300003812	Linear	9221	Clustered	IMG_VR_0142	NA	NA	NA	NA	NA	10.1093/nar/gkaa946	10.46936/10.25585/60000543
IMG_VR_0138	IMGVR_UViG_3300003813_000190|3300003813|Ga0007879_1000132	IMG_VR v3	Metagenome	3300003813	Linear	15496	Clustered	IMG_VR_0283	NA	NA	NA	NA	NA	10.1093/nar/gkaa946	10.46936/10.25585/60000543
IMG_VR_0139	IMGVR_UViG_3300003814_000222|3300003814|Ga0007877_1000721	IMG_VR v3	Metagenome	3300003814	Linear	6398	Clustered	IMG_VR_0283	NA	NA	NA	NA	NA	10.1093/nar/gkaa946	10.46936/10.25585/60000543
IMG_VR_0140	IMGVR_UViG_3300003815_000112|3300003815|Ga0007856_1000365	IMG_VR v3	Metagenome	3300003815	Linear	5372	Clustered	IMG_VR_0172	NA	NA	NA	NA	NA	10.1093/nar/gkaa946	10.46936/10.25585/60000543
IMG_VR_0141	IMGVR_UViG_3300003820_000273|3300003820|Ga0007863_1000046	IMG_VR v3	Metagenome	3300003820	Linear	20321	Clustered	IMG_VR_1182	NA	NA	NA	NA	NA	10.1093/nar/gkaa946 10.1186/s40168-019-0768-5	10.46936/10.25585/60000543
IMG_VR_0142	IMGVR_UViG_3300003820_000274|3300003820|Ga0007863_1000076	IMG_VR v3	Metagenome	3300003820	Linear	15070	Seed	IMG_VR_0142	Partial	MCP Penton PRO	NA	NA	Maveriviricetes;Priklausovirales;Burtonviroviridae	10.1093/nar/gkaa946 10.1186/s40168-019-0768-5	10.46936/10.25585/60000543
IMG_VR_0143	IMGVR_UViG_3300003820_000275|3300003820|Ga0007863_1000246	IMG_VR v3	Metagenome	3300003820	Linear	8417	Clustered	IMG_VR_0283	NA	NA	NA	NA	NA	10.1093/nar/gkaa946 10.1186/s40168-019-0768-5	10.46936/10.25585/60000543
IMG_VR_0144	IMGVR_UViG_3300003826_000019|3300003826|Ga0007872_1000226	IMG_VR v3	Metagenome	3300003826	Linear	11021	Clustered	IMG_VR_0303	NA	NA	NA	NA	NA	10.1093/nar/gkaa946	10.46936/10.25585/60000543
IMG_VR_0145	IMGVR_UViG_3300003852_000330|3300003852|Ga0031655_10000867	IMG_VR v3	Metagenome	3300003852	Linear	18601	Clustered	IMG_VR_1318	NA	NA	NA	NA	NA	10.1093/nar/gkaa946 10.1186/s40168-019-0768-5	10.46936/10.25585/60000572
IMG_VR_0146	IMGVR_UViG_3300003852_000331|3300003852|Ga0031655_10001695	IMG_VR v3	Metagenome	3300003852	Linear	13068	Seed	IMG_VR_0146	Partial	ATPase MCP Penton PRO	NA	NA	Maveriviricetes;Mividavirales;Sputniviroviridae	10.1093/nar/gkaa946 10.1186/s40168-019-0768-5	10.46936/10.25585/60000572
IMG_VR_0147	IMGVR_UViG_3300003860_000096|3300003860|Ga0031658_1000224	IMG_VR v3	Metagenome	3300003860	Linear	9082	Seed	IMG_VR_0147	Partial	MCP Penton PRO	NA	NA	Maveriviricetes;Priklausovirales;Burtonviroviridae	10.1093/nar/gkaa946 10.1126/science.aal4657	10.46936/10.25585/60000572
IMG_VR_0148	IMGVR_UViG_3300004082_000007|3300004082|Ga0062384_100002173	IMG_VR v3	Metagenome	3300004082	Linear	6083	Clustered	IMG_VR_1296	NA	NA	NA	NA	NA	10.1038/s41396-018-0334-3 10.1093/nar/gkaa946	10.46936/10.25585/60000575
IMG_VR_0149	IMGVR_UViG_3300004092_000032|3300004092|Ga0062389_100010113	IMG_VR v3	Metagenome	3300004092	Linear	6088	Clustered	IMG_VR_1296	NA	NA	NA	NA	NA	10.1038/s41396-018-0334-3 10.1093/nar/gkaa946	10.46936/10.25585/60000575
IMG_VR_0150	IMGVR_UViG_3300004097_000631|3300004097|Ga0055584_100014175	IMG_VR v3	Metagenome	3300004097	Linear	7826	Clustered	IMG_VR_1106	NA	NA	NA	NA	NA	10.1093/nar/gkaa946	10.46936/10.25585/60000792
IMG_VR_0151	IMGVR_UViG_3300004240_000423|3300004240|Ga0007787_10001102	IMG_VR v3	Metagenome	3300004240	Linear	9004	Seed	IMG_VR_0151	Partial	MCP Penton PRO	NA	NA	Maveriviricetes;Priklausovirales;Gulliviroviridae	10.1093/nar/gkaa946 10.1128/AEM.00140-20	10.46936/10.25585/60000744
IMG_VR_0152	IMGVR_UViG_3300004635_000012|3300004635|Ga0062388_100005882	IMG_VR v3	Metagenome	3300004635	Linear	6083	Clustered	IMG_VR_1296	NA	NA	NA	NA	NA	10.1038/s41396-018-0334-3 10.1093/nar/gkaa946	10.46936/10.25585/60000575
IMG_VR_0153	IMGVR_UViG_3300004684_000263|3300004684|Ga0065168_1000329	IMG_VR v3	Metagenome	3300004684	Linear	8113	Clustered	IMG_VR_0236	NA	NA	NA	NA	NA	10.1093/nar/gkaa946	10.46936/10.25585/60000543
IMG_VR_0154	IMGVR_UViG_3300004685_000198|3300004685|Ga0065177_1000021	IMG_VR v3	Metagenome	3300004685	DTR	26599	Clustered	IMG_VR_0265	NA	NA	NA	NA	NA	10.1093/nar/gkaa946	10.46936/10.25585/60000543
IMG_VR_0155	IMGVR_UViG_3300004685_000199|3300004685|Ga0065177_1000845	IMG_VR v3	Metagenome	3300004685	Linear	5324	Clustered	IMG_VR_1236	NA	NA	NA	NA	NA	10.1093/nar/gkaa946	10.46936/10.25585/60000543
IMG_VR_0156	IMGVR_UViG_3300004686_000236|3300004686|Ga0065173_1000597	IMG_VR v3	Metagenome	3300004686	Linear	6634	Clustered	IMG_VR_0303	NA	NA	NA	NA	NA	10.1093/nar/gkaa946	10.46936/10.25585/60000543
IMG_VR_0157	IMGVR_UViG_3300004687_000151|3300004687|Ga0065174_1000051	IMG_VR v3	Metagenome	3300004687	Linear	19163	Clustered	IMG_VR_0265	NA	NA	NA	NA	NA	10.1093/nar/gkaa946	10.46936/10.25585/60000543
IMG_VR_0158	IMGVR_UViG_3300004688_000006|3300004688|Ga0065169_1000011	IMG_VR v3	Metagenome	3300004688	Linear	5462	Clustered	IMG_VR_1180	NA	NA	NA	NA	NA	10.1093/nar/gkaa946	10.46936/10.25585/60000543
IMG_VR_0159	IMGVR_UViG_3300004694_000195|3300004694|Ga0065170_1000014	IMG_VR v3	Metagenome	3300004694	Linear	25166	Clustered	IMG_VR_0171	NA	NA	NA	NA	NA	10.1093/nar/gkaa946	10.46936/10.25585/60000543
IMG_VR_0160	IMGVR_UViG_3300004694_000198|3300004694|Ga0065170_1000328	IMG_VR v3	Metagenome	3300004694	Linear	6634	Clustered	IMG_VR_0303	NA	NA	NA	NA	NA	10.1093/nar/gkaa946	10.46936/10.25585/60000543
IMG_VR_0161	IMGVR_UViG_3300004770_000736|3300004770|Ga0007804_1000288	IMG_VR v3	Metagenome	3300004770	Linear	19632	Seed	IMG_VR_0161	Partial	ATPase MCP Penton PRO	NA	NA	Maveriviricetes;Priklausovirales;Omnilimnoviroviridae	10.1093/nar/gkaa946 10.1186/s40168-019-0768-5	10.46936/10.25585/60000543
IMG_VR_0162	IMGVR_UViG_3300004770_000737|3300004770|Ga0007804_1001180	IMG_VR v3	Metagenome	3300004770	Linear	9126	Seed	IMG_VR_0162	Partial	ATPase MCP PRO	NA	NA	Maveriviricetes;Unclassified	10.1093/nar/gkaa946 10.1186/s40168-019-0768-5	10.46936/10.25585/60000543
IMG_VR_0163	IMGVR_UViG_3300004777_000293|3300004777|Ga0007827_10000516	IMG_VR v3	Metagenome	3300004777	Linear	12613	Clustered	IMG_VR_0171	NA	NA	NA	NA	NA	10.1093/nar/gkaa946	10.46936/10.25585/60000543
IMG_VR_0164	IMGVR_UViG_3300004806_000483|3300004806|Ga0007854_10000451	IMG_VR v3	Metagenome	3300004806	Linear	26667	Clustered	IMG_VR_0265	NA	NA	NA	NA	NA	10.1093/nar/gkaa946 10.1186/s40168-019-0768-5	10.46936/10.25585/60000543
IMG_VR_0165	IMGVR_UViG_3300004806_000484|3300004806|Ga0007854_10000594	IMG_VR v3	Metagenome	3300004806	Linear	23263	Seed	IMG_VR_0165	Partial	ATPase MCP Penton PRO	NA	NA	Maveriviricetes;Unclassified	10.1093/nar/gkaa946 10.1186/s40168-019-0768-5	10.46936/10.25585/60000543
IMG_VR_0166	IMGVR_UViG_3300004806_000485|3300004806|Ga0007854_10001399	IMG_VR v3	Metagenome	3300004806	Linear	15305	Seed	IMG_VR_0166	Partial	ATPase MCP Penton PRO	NA	NA	Maveriviricetes;Unclassified	10.1093/nar/gkaa946 10.1186/s40168-019-0768-5	10.46936/10.25585/60000543
IMG_VR_0167	IMGVR_UViG_3300004806_000486|3300004806|Ga0007854_10004066	IMG_VR v3	Metagenome	3300004806	Linear	8763	Clustered	IMG_VR_1175	NA	NA	NA	NA	NA	10.1093/nar/gkaa946 10.1186/s40168-019-0768-5	10.46936/10.25585/60000543
IMG_VR_0168	IMGVR_UViG_3300004806_000487|3300004806|Ga0007854_10004250	IMG_VR v3	Metagenome	3300004806	Linear	8570	Clustered	IMG_VR_1236	NA	NA	NA	NA	NA	10.1093/nar/gkaa946 10.1186/s40168-019-0768-5	10.46936/10.25585/60000543
IMG_VR_0169	IMGVR_UViG_3300004806_000488|3300004806|Ga0007854_10005057	IMG_VR v3	Metagenome	3300004806	Linear	7813	Seed	IMG_VR_0169	Partial	ATPase MCP Penton PRO	NA	NA	Maveriviricetes;Unclassified	10.1093/nar/gkaa946 10.1186/s40168-019-0768-5	10.46936/10.25585/60000543
IMG_VR_0170	IMGVR_UViG_3300004806_000489|3300004806|Ga0007854_10006714	IMG_VR v3	Metagenome	3300004806	Linear	6730	Clustered	IMG_VR_0303	NA	NA	NA	NA	NA	10.1093/nar/gkaa946 10.1186/s40168-019-0768-5	10.46936/10.25585/60000543
IMG_VR_0171	IMGVR_UViG_3300004807_000911|3300004807|Ga0007809_10000095	IMG_VR v3	Metagenome	3300004807	Linear	33842	Seed	IMG_VR_0171	Near-complete	ATPase MCP Penton PRO	Group 005	Large virophages	Maveriviricetes;Priklausovirales;Gulliviroviridae	10.1093/nar/gkaa946 10.1186/s40168-019-0768-5	10.46936/10.25585/60000543
IMG_VR_0172	IMGVR_UViG_3300004807_000912|3300004807|Ga0007809_10000403	IMG_VR v3	Metagenome	3300004807	Linear	17975	Seed	IMG_VR_0172	Partial	ATPase MCP Penton PRO	NA	NA	Maveriviricetes;Priklausovirales;Burtonviroviridae	10.1093/nar/gkaa946 10.1186/s40168-019-0768-5	10.46936/10.25585/60000543
IMG_VR_0173	IMGVR_UViG_3300004807_000913|3300004807|Ga0007809_10000678	IMG_VR v3	Metagenome	3300004807	Linear	14277	Seed	IMG_VR_0173	Partial	ATPase MCP Penton PRO	NA	NA	Maveriviricetes;Unclassified	10.1093/nar/gkaa946 10.1186/s40168-019-0768-5	10.46936/10.25585/60000543
IMG_VR_0174	IMGVR_UViG_3300004807_000914|3300004807|Ga0007809_10000830	IMG_VR v3	Metagenome	3300004807	Linear	13013	Clustered	IMG_VR_0306	NA	NA	NA	NA	NA	10.1093/nar/gkaa946 10.1186/s40168-019-0768-5	10.46936/10.25585/60000543
IMG_VR_0175	IMGVR_UViG_3300004807_000916|3300004807|Ga0007809_10002269	IMG_VR v3	Metagenome	3300004807	Linear	7801	Seed	IMG_VR_0175	Partial	MCP Penton PRO	NA	NA	Maveriviricetes;Unclassified	10.1093/nar/gkaa946 10.1186/s40168-019-0768-5	10.46936/10.25585/60000543
IMG_VR_0176	IMGVR_UViG_3300004807_000917|3300004807|Ga0007809_10002323	IMG_VR v3	Metagenome	3300004807	Linear	7721	Seed	IMG_VR_0176	Partial	ATPase MCP Penton	NA	NA	Maveriviricetes;Unclassified	10.1093/nar/gkaa946 10.1186/s40168-019-0768-5	10.46936/10.25585/60000543
IMG_VR_0177	IMGVR_UViG_3300004807_000919|3300004807|Ga0007809_10003214	IMG_VR v3	Metagenome	3300004807	Linear	6494	Clustered	IMG_VR_0303	NA	NA	NA	NA	NA	10.1093/nar/gkaa946 10.1186/s40168-019-0768-5	10.46936/10.25585/60000543
IMG_VR_0178	IMGVR_UViG_3300004807_000921|3300004807|Ga0007809_10003367	IMG_VR v3	Metagenome	3300004807	Linear	6337	Clustered	IMG_VR_1118	NA	NA	NA	NA	NA	10.1093/nar/gkaa946 10.1186/s40168-019-0768-5	10.46936/10.25585/60000543
IMG_VR_0179	IMGVR_UViG_3300005119_000001|3300005119|Ga0070420_1191	IMG_VR v3	Metagenome	3300005119	Linear	10614	Seed	IMG_VR_0179	Partial	ATPase MCP Penton PRO	NA	NA	Maveriviricetes;Unclassified	10.1093/nar/gkaa946 10.1186/s40168-019-0768-5	10.46936/10.25585/60000917
IMG_VR_0184	IMGVR_UViG_3300005527_001630|3300005527|Ga0068876_10000772	IMG_VR v3	Metagenome	3300005527	Linear	25701	Clustered	IMG_VR_1306	NA	NA	NA	NA	NA	10.1093/nar/gkaa946 10.1186/s40168-019-0768-5	10.46936/10.25585/60000686
IMG_VR_0185	IMGVR_UViG_3300005527_001631|3300005527|Ga0068876_10003849	IMG_VR v3	Metagenome	3300005527	Linear	10650	Seed	IMG_VR_0185	Partial	MCP Penton PRO	NA	NA	Maveriviricetes;Unclassified	10.1093/nar/gkaa946 10.1186/s40168-019-0768-5	10.46936/10.25585/60000686
IMG_VR_0186	IMGVR_UViG_3300005527_001633|3300005527|Ga0068876_10007667	IMG_VR v3	Metagenome	3300005527	Linear	7275	Clustered	IMG_VR_1308	NA	NA	NA	NA	NA	10.1093/nar/gkaa946 10.1186/s40168-019-0768-5	10.46936/10.25585/60000686
IMG_VR_0187	IMGVR_UViG_3300005527_001634|3300005527|Ga0068876_10008321	IMG_VR v3	Metagenome	3300005527	Linear	6963	Seed	IMG_VR_0187	Partial	ATPase MCP Penton PRO	NA	NA	Maveriviricetes;Unclassified	10.1093/nar/gkaa946 10.1186/s40168-019-0768-5	10.46936/10.25585/60000686
IMG_VR_0188	IMGVR_UViG_3300005527_001636|3300005527|Ga0068876_10013685	IMG_VR v3	Metagenome	3300005527	Linear	5253	Seed	IMG_VR_0188	Partial	ATPase MCP Penton PRO	NA	NA	Maveriviricetes;Unclassified	10.1093/nar/gkaa946 10.1186/s40168-019-0768-5	10.46936/10.25585/60000686
IMG_VR_0189	IMGVR_UViG_3300005528_001138|3300005528|Ga0068872_10004051	IMG_VR v3	Metagenome	3300005528	Linear	11124	Seed	IMG_VR_0189	Partial	ATPase MCP PRO	NA	NA	Maveriviricetes;Unclassified	10.1093/nar/gkaa946 10.3389/fmicb.2019.02081	10.46936/10.25585/60000686
IMG_VR_0190	IMGVR_UViG_3300005528_001140|3300005528|Ga0068872_10013469	IMG_VR v3	Metagenome	3300005528	Linear	5691	Clustered	IMG_VR_1308	NA	NA	NA	NA	NA	10.1093/nar/gkaa946 10.3389/fmicb.2019.02081	10.46936/10.25585/60000686
IMG_VR_0191	IMGVR_UViG_3300005529_000168|3300005529|Ga0070741_10016518	IMG_VR v3	Metagenome	3300005529	Linear	12291	Seed	IMG_VR_0191	Partial	ATPase MCP Penton PRO	NA	NA	Maveriviricetes;Mividavirales;Sputniviroviridae	10.1038/s41564-018-0276-6 10.1093/nar/gkaa946 10.1186/s40168-019-0768-5	10.46936/10.25585/60007659
IMG_VR_0192	IMGVR_UViG_3300005534_000093|3300005534|Ga0070735_10004409	IMG_VR v3	Metagenome	3300005534	Linear	11889	Seed	IMG_VR_0192	Partial	ATPase MCP Penton PRO	NA	NA	Maveriviricetes;Unclassified	10.1038/s41564-018-0276-6 10.1093/nar/gkaa946 10.1186/s40168-019-0768-5	10.46936/10.25585/60007659
IMG_VR_0193	IMGVR_UViG_3300005534_000094|3300005534|Ga0070735_10005036	IMG_VR v3	Metagenome	3300005534	Linear	11022	Seed	IMG_VR_0193	Partial	ATPase MCP Penton PRO	NA	NA	Maveriviricetes;Mividavirales;Sputniviroviridae	10.1038/s41564-018-0276-6 10.1093/nar/gkaa946 10.1186/s40168-019-0768-5	10.46936/10.25585/60007659
IMG_VR_0194	IMGVR_UViG_3300005541_000054|3300005541|Ga0070733_10002713	IMG_VR v3	Metagenome	3300005541	Linear	12365	Seed	IMG_VR_0194	Partial	ATPase MCP Penton PRO	NA	NA	Maveriviricetes;Mividavirales;Sputniviroviridae	10.1038/s41564-018-0276-6 10.1093/nar/gkaa946 10.1186/s40168-019-0768-5	10.46936/10.25585/60007659
IMG_VR_0196	IMGVR_UViG_3300005581_001123|3300005581|Ga0049081_10000427	IMG_VR v3	Metagenome	3300005581	Linear	16107	Seed	IMG_VR_0196	Partial	ATPase MCP Penton PRO	NA	NA	Maveriviricetes;Mividavirales;Sputniviroviridae	10.1093/nar/gkaa946 10.1186/s40168-019-0768-5	10.46936/10.25585/60000574
IMG_VR_0197	IMGVR_UViG_3300005581_001124|3300005581|Ga0049081_10000462	IMG_VR v3	Metagenome	3300005581	Linear	15545	Seed	IMG_VR_0197	Partial	ATPase MCP Penton PRO	NA	NA	Maveriviricetes;Mividavirales;Sputniviroviridae	10.1093/nar/gkaa946 10.1186/s40168-019-0768-5	10.46936/10.25585/60000574
IMG_VR_0198	IMGVR_UViG_3300005581_001125|3300005581|Ga0049081_10000582	IMG_VR v3	Metagenome	3300005581	Linear	14066	Seed	IMG_VR_0198	Partial	ATPase MCP Penton PRO	NA	NA	Maveriviricetes;Unclassified	10.1093/nar/gkaa946 10.1186/s40168-019-0768-5	10.46936/10.25585/60000574
IMG_VR_0199	IMGVR_UViG_3300005581_001127|3300005581|Ga0049081_10003025	IMG_VR v3	Metagenome	3300005581	Linear	6335	Clustered	IMG_VR_1250	NA	NA	NA	NA	NA	10.1093/nar/gkaa946 10.1186/s40168-019-0768-5	10.46936/10.25585/60000574
IMG_VR_0200	IMGVR_UViG_3300005582_001099|3300005582|Ga0049080_10000091	IMG_VR v3	Metagenome	3300005582	DTR	26913	Seed	IMG_VR_0200	Complete	ATPase MCP Penton PRO	Group 001	Aquatic virophages 1	Maveriviricetes;Priklausovirales;Omnilimnoviroviridae	10.1093/nar/gkaa946 10.1186/s40168-019-0768-5	10.46936/10.25585/60000574
IMG_VR_0201	IMGVR_UViG_3300005582_001100|3300005582|Ga0049080_10002873	IMG_VR v3	Metagenome	3300005582	Linear	5955	Clustered	IMG_VR_1250	NA	NA	NA	NA	NA	10.1093/nar/gkaa946 10.1186/s40168-019-0768-5	10.46936/10.25585/60000574
IMG_VR_0202	IMGVR_UViG_3300005590_000229|3300005590|Ga0070727_10004000	IMG_VR v3	Metagenome	3300005590	Linear	12852	Seed	IMG_VR_0202	Partial	ATPase MCP Penton PRO	NA	NA	Maveriviricetes;Unclassified	10.1093/nar/gkaa946 10.1186/s40168-019-0768-5	10.46936/10.25585/60000564
IMG_VR_0203	IMGVR_UViG_3300005600_000228|3300005600|Ga0070726_10003750	IMG_VR v3	Metagenome	3300005600	Linear	12600	Clustered	IMG_VR_0202	NA	NA	NA	NA	NA	10.1093/nar/gkaa946	10.46936/10.25585/60000564
IMG_VR_0212	IMGVR_UViG_3300005662_001660|3300005662|Ga0078894_10001308	IMG_VR v3	Metagenome	3300005662	Linear	18436	Seed	IMG_VR_0212	Partial	ATPase MCP Penton PRO	NA	NA	Maveriviricetes;Unclassified	10.1093/nar/gkaa946 10.1186/s40168-019-0768-5	10.46936/10.25585/60000744
IMG_VR_0213	IMGVR_UViG_3300005662_001661|3300005662|Ga0078894_10003625	IMG_VR v3	Metagenome	3300005662	Linear	11720	Seed	IMG_VR_0213	Partial	ATPase MCP Penton	NA	NA	Maveriviricetes;Unclassified	10.1093/nar/gkaa946 10.1186/s40168-019-0768-5	10.46936/10.25585/60000744
IMG_VR_0214	IMGVR_UViG_3300005662_001662|3300005662|Ga0078894_10004883	IMG_VR v3	Metagenome	3300005662	Linear	10298	Seed	IMG_VR_0214	Partial	MCP Penton PRO	NA	NA	Maveriviricetes;Priklausovirales;Gulliviroviridae	10.1093/nar/gkaa946 10.1186/s40168-019-0768-5	10.46936/10.25585/60000744
IMG_VR_0215	IMGVR_UViG_3300005663_000473|3300005663|Ga0073582_101521	IMG_VR v3	Metagenome	3300005663	Linear	14620	Seed	IMG_VR_0215	Partial	ATPase MCP Penton PRO	NA	NA	Maveriviricetes;Mividavirales;Sputniviroviridae	10.1038/nature14447 10.1093/nar/gkaa946 10.1186/s40168-019-0768-5
IMG_VR_0216	IMGVR_UViG_3300005712_000007|3300005712|Ga0070764_10000374	IMG_VR v3	Metagenome	3300005712	Linear	17322	Seed	IMG_VR_0216	Near-complete	ATPase MCP Penton PRO	Group 002	Sputnik virophages	Maveriviricetes;Mividavirales;Sputniviroviridae	10.1093/nar/gkaa946 10.1186/s40168-019-0768-5	10.46936/10.25585/60007639
IMG_VR_0217	IMGVR_UViG_3300005712_000008|3300005712|Ga0070764_10005393	IMG_VR v3	Metagenome	3300005712	Linear	6068	Seed	IMG_VR_0217	Partial	ATPase MCP Penton PRO	NA	NA	Maveriviricetes;Unclassified	10.1093/nar/gkaa946 10.1186/s40168-019-0768-5	10.46936/10.25585/60007639
IMG_VR_0218	IMGVR_UViG_3300005747_000092|3300005747|Ga0076924_1015279	IMG_VR v3	Metagenome	3300005747	DTR	33095	Seed	IMG_VR_0218	Complete	ATPase MCP Penton PRO	Group 001	Aquatic virophages 1	Maveriviricetes;Priklausovirales;Omnilimnoviroviridae	10.1093/nar/gkaa946
IMG_VR_0219	IMGVR_UViG_3300005747_000372|3300005747|Ga0076924_1099425	IMG_VR v3	Metagenome	3300005747	Linear	24394	Clustered	IMG_VR_0331	NA	NA	NA	NA	NA	10.1093/nar/gkaa946
IMG_VR_0220	IMGVR_UViG_3300005758_000115|3300005758|Ga0078117_1003810	IMG_VR v3	Metagenome	3300005758	Linear	20958	Seed	IMG_VR_0220	Partial	ATPase MCP Penton PRO	NA	NA	Maveriviricetes;Priklausovirales;Dishuiviroviridae	10.1093/nar/gkaa946
IMG_VR_0221	IMGVR_UViG_3300005805_003149|3300005805|Ga0079957_1002161	IMG_VR v3	Metagenome	3300005805	Linear	17379	Seed	IMG_VR_0221	Partial	ATPase MCP Penton PRO	NA	NA	Maveriviricetes;Priklausovirales;Burtonviroviridae	10.1093/nar/gkaa946 10.1186/s40168-019-0768-5
IMG_VR_0222	IMGVR_UViG_3300005831_000021|3300005831|Ga0074471_10193221	IMG_VR v3	Metagenome	3300005831	DTR	19279	Seed	IMG_VR_0222	Complete	ATPase MCP Penton PRO	NA	NA	Maveriviricetes;Unclassified	10.1093/nar/gkaa946
IMG_VR_0223	IMGVR_UViG_3300005831_000039|3300005831|Ga0074471_10575830	IMG_VR v3	Metagenome	3300005831	Linear	16137	Seed	IMG_VR_0223	Partial	ATPase MCP Penton PRO	NA	NA	Maveriviricetes;Unclassified	10.1093/nar/gkaa946
IMG_VR_0226	IMGVR_UViG_3300005913_000613|3300005913|Ga0075108_10003012	IMG_VR v3	Metagenome	3300005913	Linear	7284	Clustered	PE_100	NA	NA	NA	NA	NA	10.1093/nar/gkaa946 10.1186/s40168-020-00889-8	10.46936/10.25585/60001034
IMG_VR_0227	IMGVR_UViG_3300005931_000682|3300005931|Ga0075119_1001447	IMG_VR v3	Metagenome	3300005931	Linear	11392	Clustered	IMG_VR_1131	NA	NA	NA	NA	NA	10.1093/nar/gkaa946 10.1186/s40168-020-00889-8	10.46936/10.25585/60001034
IMG_VR_0228	IMGVR_UViG_3300005931_000683|3300005931|Ga0075119_1002301	IMG_VR v3	Metagenome	3300005931	Linear	8625	Clustered	PE_100	NA	NA	NA	NA	NA	10.1093/nar/gkaa946 10.1186/s40168-020-00889-8	10.46936/10.25585/60001034
IMG_VR_0229	IMGVR_UViG_3300005931_000684|3300005931|Ga0075119_1002633	IMG_VR v3	Metagenome	3300005931	Linear	7899	Clustered	IMG_VR_0346	NA	NA	NA	NA	NA	10.1093/nar/gkaa946 10.1186/s40168-020-00889-8	10.46936/10.25585/60001034
IMG_VR_0230	IMGVR_UViG_3300005936_000217|3300005936|Ga0075124_10001801	IMG_VR v3	Metagenome	3300005936	Linear	9990	Clustered	IMG_VR_1147	NA	NA	NA	NA	NA	10.1093/nar/gkaa946 10.1186/s40168-020-00889-8	10.46936/10.25585/60001034
IMG_VR_0231	IMGVR_UViG_3300005939_000115|3300005939|Ga0075123_10001120	IMG_VR v3	Metagenome	3300005939	Linear	13709	Clustered	IMG_VR_1229	NA	NA	NA	NA	NA	10.1093/nar/gkaa946 10.1186/s40168-019-0768-5 10.1186/s40168-020-00889-8	10.46936/10.25585/60001034
IMG_VR_0232	IMGVR_UViG_3300005939_000335|3300005939|Ga0075123_10003547	IMG_VR v3	Metagenome	3300005939	Linear	7227	Seed	IMG_VR_0232	Partial	ATPase MCP Penton PRO	NA	NA	Maveriviricetes;Mividavirales;Sputniviroviridae	10.1093/nar/gkaa946 10.1186/s40168-019-0768-5 10.1186/s40168-020-00889-8	10.46936/10.25585/60001034
IMG_VR_0233	IMGVR_UViG_3300006039_000011|3300006039|Ga0073915_10000440	IMG_VR v3	Metagenome	3300006039	Linear	6635	Seed	IMG_VR_0233	Partial	MCP Penton PRO	NA	NA	Maveriviricetes;Priklausovirales;Omnilimnoviroviridae	10.1093/nar/gkaa946	10.46936/jejc.proj.2014.48473/60005497
IMG_VR_0234	IMGVR_UViG_3300006039_000012|3300006039|Ga0073915_10000746	IMG_VR v3	Metagenome	3300006039	Linear	5259	Clustered	IMG_VR_0439	NA	NA	NA	NA	NA	10.1093/nar/gkaa946	10.46936/jejc.proj.2014.48473/60005497
IMG_VR_0235	IMGVR_UViG_3300006056_000597|3300006056|Ga0075163_10048097	IMG_VR v3	Metagenome	3300006056	Linear	5268	Seed	IMG_VR_0235	Partial	ATPase MCP Penton	NA	NA	Maveriviricetes;Unclassified	10.1093/nar/gkaa946	10.46936/10.25585/60000666
IMG_VR_0236	IMGVR_UViG_3300006071_000596|3300006071|Ga0007876_1000165	IMG_VR v3	Metagenome	3300006071	Linear	28248	Seed	IMG_VR_0236	Near-complete	ATPase MCP Penton PRO	Group 005	Large virophages	Maveriviricetes;Priklausovirales;Gulliviroviridae	10.1093/nar/gkaa946 10.1186/s40168-019-0768-5	10.46936/10.25585/60000543
IMG_VR_0237	IMGVR_UViG_3300006071_000597|3300006071|Ga0007876_1000258	IMG_VR v3	Metagenome	3300006071	Linear	22072	Seed	IMG_VR_0237	Partial	ATPase MCP Penton PRO	NA	NA	Maveriviricetes;Unclassified	10.1093/nar/gkaa946 10.1186/s40168-019-0768-5	10.46936/10.25585/60000543
IMG_VR_0238	IMGVR_UViG_3300006071_000598|3300006071|Ga0007876_1000599	IMG_VR v3	Metagenome	3300006071	Linear	13339	Clustered	PE_073	NA	NA	NA	NA	NA	10.1093/nar/gkaa946 10.1186/s40168-019-0768-5	10.46936/10.25585/60000543
IMG_VR_0239	IMGVR_UViG_3300006071_000599|3300006071|Ga0007876_1001272	IMG_VR v3	Metagenome	3300006071	Linear	8571	Clustered	IMG_VR_0283	NA	NA	NA	NA	NA	10.1093/nar/gkaa946 10.1186/s40168-019-0768-5	10.46936/10.25585/60000543
IMG_VR_0240	IMGVR_UViG_3300006071_000605|3300006071|Ga0007876_1003319	IMG_VR v3	Metagenome	3300006071	Linear	5029	Clustered	IMG_VR_0292	NA	NA	NA	NA	NA	10.1093/nar/gkaa946 10.1186/s40168-019-0768-5	10.46936/10.25585/60000543
IMG_VR_0241	IMGVR_UViG_3300006072_000536|3300006072|Ga0007881_1000345	IMG_VR v3	Metagenome	3300006072	Linear	22030	Clustered	IMG_VR_0237	NA	NA	NA	NA	NA	10.1093/nar/gkaa946	10.46936/10.25585/60000543
IMG_VR_0242	IMGVR_UViG_3300006072_000537|3300006072|Ga0007881_1000406	IMG_VR v3	Metagenome	3300006072	Linear	20321	Clustered	IMG_VR_0236	NA	NA	NA	NA	NA	10.1093/nar/gkaa946	10.46936/10.25585/60000543
IMG_VR_0243	IMGVR_UViG_3300006072_000538|3300006072|Ga0007881_1000459	IMG_VR v3	Metagenome	3300006072	Linear	18786	Clustered	IMG_VR_0165	NA	NA	NA	NA	NA	10.1093/nar/gkaa946	10.46936/10.25585/60000543
IMG_VR_0244	IMGVR_UViG_3300006072_000540|3300006072|Ga0007881_1001408	IMG_VR v3	Metagenome	3300006072	Linear	9309	Seed	IMG_VR_0244	Partial	MCP Penton PRO	NA	NA	Maveriviricetes;Priklausovirales;Burtonviroviridae	10.1093/nar/gkaa946	10.46936/10.25585/60000543
IMG_VR_0245	IMGVR_UViG_3300006072_000541|3300006072|Ga0007881_1002923	IMG_VR v3	Metagenome	3300006072	Linear	6041	Clustered	IMG_VR_1202	NA	NA	NA	NA	NA	10.1093/nar/gkaa946	10.46936/10.25585/60000543
IMG_VR_0246	IMGVR_UViG_3300006100_000565|3300006100|Ga0007806_1000231	IMG_VR v3	Metagenome	3300006100	DTR	18754	Clustered	PE_073	NA	NA	NA	NA	NA	10.1093/nar/gkaa946 10.1186/s40168-019-0768-5	10.46936/10.25585/60000543
IMG_VR_0247	IMGVR_UViG_3300006100_000566|3300006100|Ga0007806_1000639	IMG_VR v3	Metagenome	3300006100	Linear	11457	Clustered	IMG_VR_0283	NA	NA	NA	NA	NA	10.1093/nar/gkaa946 10.1186/s40168-019-0768-5	10.46936/10.25585/60000543
IMG_VR_0248	IMGVR_UViG_3300006100_000567|3300006100|Ga0007806_1000893	IMG_VR v3	Metagenome	3300006100	Linear	9540	Seed	IMG_VR_0248	Partial	MCP Penton PRO	NA	NA	Maveriviricetes;Priklausovirales;Burtonviroviridae	10.1093/nar/gkaa946 10.1186/s40168-019-0768-5	10.46936/10.25585/60000543
IMG_VR_0249	IMGVR_UViG_3300006100_000568|3300006100|Ga0007806_1001136	IMG_VR v3	Metagenome	3300006100	Linear	8361	Clustered	IMG_VR_0236	NA	NA	NA	NA	NA	10.1093/nar/gkaa946 10.1186/s40168-019-0768-5	10.46936/10.25585/60000543
IMG_VR_0250	IMGVR_UViG_3300006103_000483|3300006103|Ga0007813_1000158	IMG_VR v3	Metagenome	3300006103	Linear	24349	Clustered	IMG_VR_1185	NA	NA	NA	NA	NA	10.1093/nar/gkaa946 10.1186/s40168-019-0768-5	10.46936/10.25585/60000543
IMG_VR_0251	IMGVR_UViG_3300006103_000484|3300006103|Ga0007813_1002041	IMG_VR v3	Metagenome	3300006103	Linear	6151	Clustered	IMG_VR_1202	NA	NA	NA	NA	NA	10.1093/nar/gkaa946 10.1186/s40168-019-0768-5	10.46936/10.25585/60000543
IMG_VR_0252	IMGVR_UViG_3300006104_000459|3300006104|Ga0007882_10000646	IMG_VR v3	Metagenome	3300006104	Linear	20450	Clustered	IMG_VR_0236	NA	NA	NA	NA	NA	10.1093/nar/gkaa946 10.1186/s40168-019-0768-5	10.46936/10.25585/60000543
IMG_VR_0253	IMGVR_UViG_3300006104_000460|3300006104|Ga0007882_10001075	IMG_VR v3	Metagenome	3300006104	Linear	16131	Clustered	IMG_VR_1216	NA	NA	NA	NA	NA	10.1093/nar/gkaa946 10.1186/s40168-019-0768-5	10.46936/10.25585/60000543
IMG_VR_0254	IMGVR_UViG_3300006104_000461|3300006104|Ga0007882_10005974	IMG_VR v3	Metagenome	3300006104	Linear	6393	Clustered	IMG_VR_1202	NA	NA	NA	NA	NA	10.1093/nar/gkaa946 10.1186/s40168-019-0768-5	10.46936/10.25585/60000543
IMG_VR_0255	IMGVR_UViG_3300006105_000170|3300006105|Ga0007819_1000251	IMG_VR v3	Metagenome	3300006105	Linear	18676	Clustered	IMG_VR_1185	NA	NA	NA	NA	NA	10.1093/nar/gkaa946	10.46936/10.25585/60000543
IMG_VR_0256	IMGVR_UViG_3300006105_000755|3300006105|Ga0007819_1001801	IMG_VR v3	Metagenome	3300006105	Linear	6652	Clustered	IMG_VR_1202	NA	NA	NA	NA	NA	10.1093/nar/gkaa946	10.46936/10.25585/60000543
IMG_VR_0257	IMGVR_UViG_3300006105_000756|3300006105|Ga0007819_1001876	IMG_VR v3	Metagenome	3300006105	Linear	6508	Clustered	IMG_VR_0236	NA	NA	NA	NA	NA	10.1093/nar/gkaa946	10.46936/10.25585/60000543
IMG_VR_0258	IMGVR_UViG_3300006106_000114|3300006106|Ga0007833_1000846	IMG_VR v3	Metagenome	3300006106	Linear	6972	Clustered	IMG_VR_0303	NA	NA	NA	NA	NA	10.1093/nar/gkaa946	10.46936/10.25585/60000543
IMG_VR_0259	IMGVR_UViG_3300006107_000051|3300006107|Ga0007836_1000373	IMG_VR v3	Metagenome	3300006107	Linear	9934	Clustered	IMG_VR_1216	NA	NA	NA	NA	NA	10.1093/nar/gkaa946	10.46936/10.25585/60000543
IMG_VR_0260	IMGVR_UViG_3300006107_000052|3300006107|Ga0007836_1000432	IMG_VR v3	Metagenome	3300006107	Linear	9219	Clustered	IMG_VR_1187	NA	NA	NA	NA	NA	10.1093/nar/gkaa946	10.46936/10.25585/60000543
IMG_VR_0261	IMGVR_UViG_3300006107_000053|3300006107|Ga0007836_1000491	IMG_VR v3	Metagenome	3300006107	Linear	8583	Seed	IMG_VR_0261	Partial	ATPase MCP Penton PRO	NA	NA	Maveriviricetes;Unclassified	10.1093/nar/gkaa946	10.46936/10.25585/60000543
IMG_VR_0262	IMGVR_UViG_3300006108_000433|3300006108|Ga0007862_1000304	IMG_VR v3	Metagenome	3300006108	Linear	16042	Clustered	IMG_VR_1216	NA	NA	NA	NA	NA	10.1093/nar/gkaa946 10.1186/s40168-019-0768-5	10.46936/10.25585/60000543
IMG_VR_0263	IMGVR_UViG_3300006108_000434|3300006108|Ga0007862_1000466	IMG_VR v3	Metagenome	3300006108	Linear	12709	Clustered	IMG_VR_1180	NA	NA	NA	NA	NA	10.1093/nar/gkaa946 10.1186/s40168-019-0768-5	10.46936/10.25585/60000543
IMG_VR_0264	IMGVR_UViG_3300006108_000436|3300006108|Ga0007862_1001431	IMG_VR v3	Metagenome	3300006108	Linear	6695	Clustered	IMG_VR_0303	NA	NA	NA	NA	NA	10.1093/nar/gkaa946 10.1186/s40168-019-0768-5	10.46936/10.25585/60000543
IMG_VR_0265	IMGVR_UViG_3300006109_000190|3300006109|Ga0007870_1000162	IMG_VR v3	Metagenome	3300006109	DTR	26677	Seed	IMG_VR_0265	Complete	ATPase MCP Penton PRO	Group 003	Aquatic virophages 2	Maveriviricetes;Priklausovirales;Burtonviroviridae	10.1093/nar/gkaa946 10.1186/s40168-019-0768-5	10.46936/10.25585/60000543
IMG_VR_0266	IMGVR_UViG_3300006109_000191|3300006109|Ga0007870_1000364	IMG_VR v3	Metagenome	3300006109	Linear	15115	Clustered	IMG_VR_0166	NA	NA	NA	NA	NA	10.1093/nar/gkaa946 10.1186/s40168-019-0768-5	10.46936/10.25585/60000543
IMG_VR_0267	IMGVR_UViG_3300006109_000192|3300006109|Ga0007870_1000379	IMG_VR v3	Metagenome	3300006109	Linear	14652	Clustered	IMG_VR_1175	NA	NA	NA	NA	NA	10.1093/nar/gkaa946 10.1186/s40168-019-0768-5	10.46936/10.25585/60000543
IMG_VR_0268	IMGVR_UViG_3300006111_000190|3300006111|Ga0007848_1000159	IMG_VR v3	Metagenome	3300006111	DTR	26677	Clustered	IMG_VR_0265	NA	NA	NA	NA	NA	10.1093/nar/gkaa946 10.1186/s40168-019-0768-5	10.46936/10.25585/60000543
IMG_VR_0269	IMGVR_UViG_3300006111_000191|3300006111|Ga0007848_1000345	IMG_VR v3	Metagenome	3300006111	Linear	16283	Clustered	IMG_VR_1236	NA	NA	NA	NA	NA	10.1093/nar/gkaa946 10.1186/s40168-019-0768-5	10.46936/10.25585/60000543
IMG_VR_0270	IMGVR_UViG_3300006112_000446|3300006112|Ga0007857_1000968	IMG_VR v3	Metagenome	3300006112	Linear	8089	Clustered	IMG_VR_0283	NA	NA	NA	NA	NA	10.1093/nar/gkaa946	10.46936/10.25585/60000543
IMG_VR_0271	IMGVR_UViG_3300006112_000447|3300006112|Ga0007857_1001294	IMG_VR v3	Metagenome	3300006112	Linear	6894	Clustered	IMG_VR_0303	NA	NA	NA	NA	NA	10.1093/nar/gkaa946	10.46936/10.25585/60000543
IMG_VR_0272	IMGVR_UViG_3300006113_000170|3300006113|Ga0007858_1000566	IMG_VR v3	Metagenome	3300006113	Linear	11159	Clustered	IMG_VR_0303	NA	NA	NA	NA	NA	10.1093/nar/gkaa946	10.46936/10.25585/60000543
IMG_VR_0273	IMGVR_UViG_3300006114_000469|3300006114|Ga0007815_1000154	IMG_VR v3	Metagenome	3300006114	DTR	21770	Seed	IMG_VR_0273	Complete	ATPase MCP Penton PRO	Group 001	Aquatic virophages 1	Maveriviricetes;Priklausovirales;Omnilimnoviroviridae	10.1093/nar/gkaa946 10.1186/s40168-019-0768-5	10.46936/10.25585/60000543
IMG_VR_0274	IMGVR_UViG_3300006114_000470|3300006114|Ga0007815_1000687	IMG_VR v3	Metagenome	3300006114	Linear	10514	Clustered	IMG_VR_0236	NA	NA	NA	NA	NA	10.1093/nar/gkaa946 10.1186/s40168-019-0768-5	10.46936/10.25585/60000543
IMG_VR_0275	IMGVR_UViG_3300006115_000590|3300006115|Ga0007816_1000133	IMG_VR v3	Metagenome	3300006115	DTR	21770	Clustered	IMG_VR_0273	NA	NA	NA	NA	NA	10.1093/nar/gkaa946	10.46936/10.25585/60000543
IMG_VR_0276	IMGVR_UViG_3300006115_000591|3300006115|Ga0007816_1000160	IMG_VR v3	Metagenome	3300006115	Linear	20343	Clustered	IMG_VR_0236	NA	NA	NA	NA	NA	10.1093/nar/gkaa946	10.46936/10.25585/60000543
IMG_VR_0277	IMGVR_UViG_3300006115_000592|3300006115|Ga0007816_1000709	IMG_VR v3	Metagenome	3300006115	Linear	9626	Clustered	IMG_VR_1200	NA	NA	NA	NA	NA	10.1093/nar/gkaa946	10.46936/10.25585/60000543
IMG_VR_0278	IMGVR_UViG_3300006115_000593|3300006115|Ga0007816_1001055	IMG_VR v3	Metagenome	3300006115	Linear	7922	Seed	IMG_VR_0278	Partial	ATPase MCP Penton PRO	NA	NA	Maveriviricetes;Unclassified	10.1093/nar/gkaa946	10.46936/10.25585/60000543
IMG_VR_0279	IMGVR_UViG_3300006115_000594|3300006115|Ga0007816_1001597	IMG_VR v3	Metagenome	3300006115	Linear	6381	Clustered	IMG_VR_1202	NA	NA	NA	NA	NA	10.1093/nar/gkaa946	10.46936/10.25585/60000543
IMG_VR_0280	IMGVR_UViG_3300006116_000527|3300006116|Ga0007807_1000226	IMG_VR v3	Metagenome	3300006116	Linear	20466	Clustered	IMG_VR_0236	NA	NA	NA	NA	NA	10.1093/nar/gkaa946	10.46936/10.25585/60000543
IMG_VR_0281	IMGVR_UViG_3300006116_000530|3300006116|Ga0007807_1001325	IMG_VR v3	Metagenome	3300006116	Linear	7879	Clustered	IMG_VR_0283	NA	NA	NA	NA	NA	10.1093/nar/gkaa946	10.46936/10.25585/60000543
IMG_VR_0282	IMGVR_UViG_3300006116_000531|3300006116|Ga0007807_1002126	IMG_VR v3	Metagenome	3300006116	Linear	5906	Clustered	IMG_VR_1200	NA	NA	NA	NA	NA	10.1093/nar/gkaa946	10.46936/10.25585/60000543
IMG_VR_0283	IMGVR_UViG_3300006117_000276|3300006117|Ga0007818_1000137	IMG_VR v3	Metagenome	3300006117	Linear	21830	Seed	IMG_VR_0283	Partial	ATPase MCP Penton PRO	NA	NA	Maveriviricetes;Priklausovirales;Burtonviroviridae	10.1093/nar/gkaa946 10.1186/s40168-019-0768-5	10.46936/10.25585/60000543
IMG_VR_0284	IMGVR_UViG_3300006118_000424|3300006118|Ga0007859_1000041	IMG_VR v3	Metagenome	3300006118	Linear	33696	Clustered	IMG_VR_0171	NA	NA	NA	NA	NA	10.1093/nar/gkaa946 10.1186/s40168-019-0768-5	10.46936/10.25585/60000543
IMG_VR_0285	IMGVR_UViG_3300006118_000425|3300006118|Ga0007859_1000217	IMG_VR v3	Metagenome	3300006118	Linear	16084	Clustered	IMG_VR_1189	NA	NA	NA	NA	NA	10.1093/nar/gkaa946 10.1186/s40168-019-0768-5	10.46936/10.25585/60000543
IMG_VR_0286	IMGVR_UViG_3300006118_000426|3300006118|Ga0007859_1000418	IMG_VR v3	Metagenome	3300006118	Linear	12005	Clustered	IMG_VR_0290	NA	NA	NA	NA	NA	10.1093/nar/gkaa946 10.1186/s40168-019-0768-5	10.46936/10.25585/60000543
IMG_VR_0287	IMGVR_UViG_3300006118_000427|3300006118|Ga0007859_1000485	IMG_VR v3	Metagenome	3300006118	Linear	11159	Clustered	IMG_VR_0303	NA	NA	NA	NA	NA	10.1093/nar/gkaa946 10.1186/s40168-019-0768-5	10.46936/10.25585/60000543
IMG_VR_0288	IMGVR_UViG_3300006119_000496|3300006119|Ga0007866_1000041	IMG_VR v3	Metagenome	3300006119	Linear	33696	Clustered	IMG_VR_0171	NA	NA	NA	NA	NA	10.1093/nar/gkaa946 10.1186/s40168-019-0768-5	10.46936/10.25585/60000543
IMG_VR_0289	IMGVR_UViG_3300006119_000497|3300006119|Ga0007866_1000143	IMG_VR v3	Metagenome	3300006119	Linear	19699	Seed	IMG_VR_0289	Partial	ATPase MCP Penton PRO	NA	NA	Maveriviricetes;Priklausovirales;Burtonviroviridae	10.1093/nar/gkaa946 10.1186/s40168-019-0768-5	10.46936/10.25585/60000543
IMG_VR_0290	IMGVR_UViG_3300006119_000498|3300006119|Ga0007866_1000151	IMG_VR v3	Metagenome	3300006119	Linear	19359	Seed	IMG_VR_0290	Partial	MCP Penton PRO	NA	NA	Maveriviricetes;Priklausovirales;Burtonviroviridae	10.1093/nar/gkaa946 10.1186/s40168-019-0768-5	10.46936/10.25585/60000543
IMG_VR_0291	IMGVR_UViG_3300006119_000499|3300006119|Ga0007866_1000259	IMG_VR v3	Metagenome	3300006119	Linear	15258	Clustered	IMG_VR_0306	NA	NA	NA	NA	NA	10.1093/nar/gkaa946 10.1186/s40168-019-0768-5	10.46936/10.25585/60000543
IMG_VR_0292	IMGVR_UViG_3300006119_000500|3300006119|Ga0007866_1000304	IMG_VR v3	Metagenome	3300006119	Linear	14311	Seed	IMG_VR_0292	Partial	MCP Penton PRO	NA	NA	Maveriviricetes;Priklausovirales;Burtonviroviridae	10.1093/nar/gkaa946 10.1186/s40168-019-0768-5	10.46936/10.25585/60000543
IMG_VR_0293	IMGVR_UViG_3300006119_000501|3300006119|Ga0007866_1000399	IMG_VR v3	Metagenome	3300006119	Linear	12687	Seed	IMG_VR_0293	Partial	ATPase MCP Penton PRO	NA	NA	Maveriviricetes;Priklausovirales;Omnilimnoviroviridae	10.1093/nar/gkaa946 10.1186/s40168-019-0768-5	10.46936/10.25585/60000543
IMG_VR_0294	IMGVR_UViG_3300006119_000502|3300006119|Ga0007866_1000474	IMG_VR v3	Metagenome	3300006119	Linear	11725	Clustered	IMG_VR_0142	NA	NA	NA	NA	NA	10.1093/nar/gkaa946 10.1186/s40168-019-0768-5	10.46936/10.25585/60000543
IMG_VR_0295	IMGVR_UViG_3300006119_000503|3300006119|Ga0007866_1000554	IMG_VR v3	Metagenome	3300006119	Linear	10955	Clustered	IMG_VR_0165	NA	NA	NA	NA	NA	10.1093/nar/gkaa946 10.1186/s40168-019-0768-5	10.46936/10.25585/60000543
IMG_VR_0296	IMGVR_UViG_3300006120_000414|3300006120|Ga0007867_1000664	IMG_VR v3	Metagenome	3300006120	Linear	11159	Clustered	IMG_VR_0303	NA	NA	NA	NA	NA	10.1093/nar/gkaa946	10.46936/10.25585/60000543
IMG_VR_0297	IMGVR_UViG_3300006120_000415|3300006120|Ga0007867_1001255	IMG_VR v3	Metagenome	3300006120	Linear	7382	Clustered	IMG_VR_0166	NA	NA	NA	NA	NA	10.1093/nar/gkaa946	10.46936/10.25585/60000543
IMG_VR_0298	IMGVR_UViG_3300006120_000416|3300006120|Ga0007867_1001464	IMG_VR v3	Metagenome	3300006120	Linear	6773	Clustered	IMG_VR_1236	NA	NA	NA	NA	NA	10.1093/nar/gkaa946	10.46936/10.25585/60000543
IMG_VR_0299	IMGVR_UViG_3300006121_000428|3300006121|Ga0007824_1000834	IMG_VR v3	Metagenome	3300006121	Linear	8227	Clustered	IMG_VR_0303	NA	NA	NA	NA	NA	10.1093/nar/gkaa946	10.46936/10.25585/60000543
IMG_VR_0300	IMGVR_UViG_3300006122_000088|3300006122|Ga0007837_1000084	IMG_VR v3	Metagenome	3300006122	Linear	14979	Seed	IMG_VR_0300	Partial	ATPase MCP Penton PRO	NA	NA	Maveriviricetes;Unclassified	10.1093/nar/gkaa946 10.1186/s40168-019-0768-5	10.46936/10.25585/60000543
IMG_VR_0301	IMGVR_UViG_3300006123_000419|3300006123|Ga0007852_1000565	IMG_VR v3	Metagenome	3300006123	Linear	11290	Clustered	IMG_VR_0303	NA	NA	NA	NA	NA	10.1093/nar/gkaa946	10.46936/10.25585/60000543
IMG_VR_0302	IMGVR_UViG_3300006123_000420|3300006123|Ga0007852_1001132	IMG_VR v3	Metagenome	3300006123	Linear	7192	Clustered	IMG_VR_0283	NA	NA	NA	NA	NA	10.1093/nar/gkaa946	10.46936/10.25585/60000543
IMG_VR_0303	IMGVR_UViG_3300006126_000043|3300006126|Ga0007855_1000567	IMG_VR v3	Metagenome	3300006126	Linear	11582	Seed	IMG_VR_0303	Partial	MCP Penton PRO	NA	NA	Maveriviricetes;Priklausovirales;Burtonviroviridae	10.1093/nar/gkaa946	10.46936/10.25585/60000543
IMG_VR_0304	IMGVR_UViG_3300006127_000657|3300006127|Ga0007805_1000203	IMG_VR v3	Metagenome	3300006127	Linear	21665	Clustered	IMG_VR_0237	NA	NA	NA	NA	NA	10.1093/nar/gkaa946 10.1186/s40168-019-0768-5	10.46936/10.25585/60000543
IMG_VR_0305	IMGVR_UViG_3300006127_000658|3300006127|Ga0007805_1000232	IMG_VR v3	Metagenome	3300006127	Linear	20380	Clustered	IMG_VR_0236	NA	NA	NA	NA	NA	10.1093/nar/gkaa946 10.1186/s40168-019-0768-5	10.46936/10.25585/60000543
IMG_VR_0306	IMGVR_UViG_3300006127_000659|3300006127|Ga0007805_1000262	IMG_VR v3	Metagenome	3300006127	Linear	19035	Seed	IMG_VR_0306	Partial	ATPase MCP Penton PRO	NA	NA	Maveriviricetes;Unclassified	10.1093/nar/gkaa946 10.1186/s40168-019-0768-5	10.46936/10.25585/60000543
IMG_VR_0307	IMGVR_UViG_3300006127_000663|3300006127|Ga0007805_1000719	IMG_VR v3	Metagenome	3300006127	Linear	11289	Seed	IMG_VR_0307	Partial	ATPase MCP Penton PRO	NA	NA	Maveriviricetes;Priklausovirales;Burtonviroviridae	10.1093/nar/gkaa946 10.1186/s40168-019-0768-5	10.46936/10.25585/60000543
IMG_VR_0308	IMGVR_UViG_3300006127_000664|3300006127|Ga0007805_1000725	IMG_VR v3	Metagenome	3300006127	Linear	11178	Seed	IMG_VR_0308	Partial	ATPase MCP Penton PRO	NA	NA	Maveriviricetes;Unclassified	10.1093/nar/gkaa946 10.1186/s40168-019-0768-5	10.46936/10.25585/60000543
IMG_VR_0309	IMGVR_UViG_3300006127_000665|3300006127|Ga0007805_1001131	IMG_VR v3	Metagenome	3300006127	Linear	8745	Clustered	IMG_VR_0248	NA	NA	NA	NA	NA	10.1093/nar/gkaa946 10.1186/s40168-019-0768-5	10.46936/10.25585/60000543
IMG_VR_0310	IMGVR_UViG_3300006127_000667|3300006127|Ga0007805_1002197	IMG_VR v3	Metagenome	3300006127	Linear	6064	Clustered	IMG_VR_1202	NA	NA	NA	NA	NA	10.1093/nar/gkaa946 10.1186/s40168-019-0768-5	10.46936/10.25585/60000543
IMG_VR_0311	IMGVR_UViG_3300006128_000474|3300006128|Ga0007828_1000217	IMG_VR v3	Metagenome	3300006128	Linear	16042	Clustered	IMG_VR_1216	NA	NA	NA	NA	NA	10.1093/nar/gkaa946 10.1186/s40168-019-0768-5	10.46936/10.25585/60000543
IMG_VR_0312	IMGVR_UViG_3300006128_000475|3300006128|Ga0007828_1000470	IMG_VR v3	Metagenome	3300006128	Linear	10306	Seed	IMG_VR_0312	Partial	ATPase MCP Penton PRO	NA	NA	Maveriviricetes;Unclassified	10.1093/nar/gkaa946 10.1186/s40168-019-0768-5	10.46936/10.25585/60000543
IMG_VR_0313	IMGVR_UViG_3300006129_000193|3300006129|Ga0007834_1000393	IMG_VR v3	Metagenome	3300006129	Linear	13985	Seed	IMG_VR_0313	Partial	ATPase MCP Penton PRO	NA	NA	Maveriviricetes;Unclassified	10.1093/nar/gkaa946 10.1186/s40168-019-0768-5	10.46936/10.25585/60000543
IMG_VR_0315	IMGVR_UViG_3300006484_000726|3300006484|Ga0070744_10000380	IMG_VR v3	Metagenome	3300006484	Linear	12676	Seed	IMG_VR_0315	Partial	ATPase MCP Penton PRO	NA	NA	Maveriviricetes;Unclassified	10.1093/nar/gkaa946 10.1186/s40168-019-0768-5	10.46936/10.25585/60000867
IMG_VR_0316	IMGVR_UViG_3300006802_005653|3300006802|Ga0070749_10000412	IMG_VR v3	Metagenome	3300006802	Linear	28880	Clustered	IMG_VR_0331	NA	NA	NA	NA	NA	10.1093/nar/gkaa946 10.1128/mSystems.01020-20 10.1186/s40168-019-0768-5	10.46936/10.25585/60000748
IMG_VR_0317	IMGVR_UViG_3300006802_005654|3300006802|Ga0070749_10000650	IMG_VR v3	Metagenome	3300006802	Linear	23468	Seed	IMG_VR_0317	Near-complete	ATPase MCP Penton PRO	Group 002	Sputnik virophages	Maveriviricetes;Mividavirales;Sputniviroviridae	10.1093/nar/gkaa946 10.1128/mSystems.01020-20 10.1186/s40168-019-0768-5	10.46936/10.25585/60000748
IMG_VR_0318	IMGVR_UViG_3300006802_005655|3300006802|Ga0070749_10000779	IMG_VR v3	Metagenome	3300006802	Linear	21373	Seed	IMG_VR_0318	Partial	ATPase MCP Penton PRO	NA	NA	Maveriviricetes;Unclassified	10.1093/nar/gkaa946 10.1128/mSystems.01020-20 10.1186/s40168-019-0768-5	10.46936/10.25585/60000748
IMG_VR_0319	IMGVR_UViG_3300006802_005656|3300006802|Ga0070749_10001201	IMG_VR v3	Metagenome	3300006802	Linear	17527	Seed	IMG_VR_0319	Partial	ATPase MCP Penton PRO	NA	NA	Maveriviricetes;Unclassified	10.1093/nar/gkaa946 10.1128/mSystems.01020-20 10.1186/s40168-019-0768-5	10.46936/10.25585/60000748
IMG_VR_0320	IMGVR_UViG_3300006802_005657|3300006802|Ga0070749_10001496	IMG_VR v3	Metagenome	3300006802	Linear	15853	Seed	IMG_VR_0320	Partial	ATPase MCP Penton PRO	NA	NA	Maveriviricetes;Unclassified	10.1093/nar/gkaa946 10.1128/mSystems.01020-20 10.1186/s40168-019-0768-5	10.46936/10.25585/60000748
IMG_VR_0321	IMGVR_UViG_3300006802_005658|3300006802|Ga0070749_10002953	IMG_VR v3	Metagenome	3300006802	Linear	11407	Seed	IMG_VR_0321	Partial	ATPase MCP Penton	NA	NA	Maveriviricetes;Unclassified	10.1093/nar/gkaa946 10.1128/mSystems.01020-20 10.1186/s40168-019-0768-5	10.46936/10.25585/60000748
IMG_VR_0322	IMGVR_UViG_3300006802_005662|3300006802|Ga0070749_10007648	IMG_VR v3	Metagenome	3300006802	Linear	7062	Seed	IMG_VR_0322	Partial	ATPase MCP Penton PRO	NA	NA	Maveriviricetes;Mividavirales;Sputniviroviridae	10.1093/nar/gkaa946 10.1128/mSystems.01020-20 10.1186/s40168-019-0768-5	10.46936/10.25585/60000748
IMG_VR_0323	IMGVR_UViG_3300006802_005663|3300006802|Ga0070749_10008980	IMG_VR v3	Metagenome	3300006802	Linear	6495	Clustered	IMG_VR_0342	NA	NA	NA	NA	NA	10.1093/nar/gkaa946 10.1128/mSystems.01020-20 10.1186/s40168-019-0768-5	10.46936/10.25585/60000748
IMG_VR_0324	IMGVR_UViG_3300006802_005667|3300006802|Ga0070749_10012109	IMG_VR v3	Metagenome	3300006802	Linear	5553	Clustered	IMG_VR_0358	NA	NA	NA	NA	NA	10.1093/nar/gkaa946 10.1128/mSystems.01020-20 10.1186/s40168-019-0768-5	10.46936/10.25585/60000748
IMG_VR_0325	IMGVR_UViG_3300006810_004087|3300006810|Ga0070754_10005004	IMG_VR v3	Metagenome	3300006810	Linear	8984	Clustered	IMG_VR_0360	NA	NA	NA	NA	NA	10.1093/nar/gkaa946 10.1128/mSystems.01020-20	10.46936/10.25585/60000748
IMG_VR_0326	IMGVR_UViG_3300006810_004088|3300006810|Ga0070754_10006514	IMG_VR v3	Metagenome	3300006810	Linear	7747	Clustered	IMG_VR_0359	NA	NA	NA	NA	NA	10.1093/nar/gkaa946 10.1128/mSystems.01020-20	10.46936/10.25585/60000748
IMG_VR_0327	IMGVR_UViG_3300006868_001561|3300006868|Ga0075481_10004564	IMG_VR v3	Metagenome	3300006868	Linear	5587	Clustered	IMG_VR_0362	NA	NA	NA	NA	NA	10.1093/nar/gkaa946 10.1128/mSystems.01020-20	10.46936/10.25585/60000748
IMG_VR_0328	IMGVR_UViG_3300006869_001481|3300006869|Ga0075477_10002609	IMG_VR v3	Metagenome	3300006869	Linear	8616	Seed	IMG_VR_0328	Partial	ATPase MCP Penton PRO	NA	NA	Maveriviricetes;Mividavirales;Sputniviroviridae	10.1093/nar/gkaa946 10.1128/mSystems.01020-20	10.46936/10.25585/60000748
IMG_VR_0329	IMGVR_UViG_3300006874_001728|3300006874|Ga0075475_10008003	IMG_VR v3	Metagenome	3300006874	Linear	5364	Clustered	IMG_VR_0358	NA	NA	NA	NA	NA	10.1093/nar/gkaa946 10.1128/mSystems.01020-20	10.46936/10.25585/60000748
IMG_VR_0330	IMGVR_UViG_3300006875_001249|3300006875|Ga0075473_10000931	IMG_VR v3	Metagenome	3300006875	Linear	12394	Seed	IMG_VR_0330	Partial	ATPase MCP Penton PRO	NA	NA	Maveriviricetes;Priklausovirales;Burtonviroviridae	10.1093/nar/gkaa946 10.1186/s40168-019-0768-5	10.46936/10.25585/60000748
IMG_VR_0331	IMGVR_UViG_3300006916_004084|3300006916|Ga0070750_10000267	IMG_VR v3	Metagenome	3300006916	DTR	28912	Seed	IMG_VR_0331	Complete	ATPase MCP Penton PRO	Group 001	Aquatic virophages 1	Maveriviricetes;Priklausovirales;Omnilimnoviroviridae	10.1093/nar/gkaa946 10.1128/mSystems.01020-20 10.1186/s40168-019-0768-5	10.46936/10.25585/60000748
IMG_VR_0332	IMGVR_UViG_3300006916_004085|3300006916|Ga0070750_10001043	IMG_VR v3	Metagenome	3300006916	Linear	15535	Clustered	IMG_VR_0337	NA	NA	NA	NA	NA	10.1093/nar/gkaa946 10.1128/mSystems.01020-20 10.1186/s40168-019-0768-5	10.46936/10.25585/60000748
IMG_VR_0333	IMGVR_UViG_3300006916_004086|3300006916|Ga0070750_10001318	IMG_VR v3	Metagenome	3300006916	Linear	13822	Clustered	IMG_VR_0318	NA	NA	NA	NA	NA	10.1093/nar/gkaa946 10.1128/mSystems.01020-20 10.1186/s40168-019-0768-5	10.46936/10.25585/60000748
IMG_VR_0334	IMGVR_UViG_3300006916_004087|3300006916|Ga0070750_10002102	IMG_VR v3	Metagenome	3300006916	Linear	11069	Clustered	IMG_VR_0320	NA	NA	NA	NA	NA	10.1093/nar/gkaa946 10.1128/mSystems.01020-20 10.1186/s40168-019-0768-5	10.46936/10.25585/60000748
IMG_VR_0335	IMGVR_UViG_3300006916_004088|3300006916|Ga0070750_10003245	IMG_VR v3	Metagenome	3300006916	Linear	9039	Seed	IMG_VR_0335	Partial	ATPase MCP Penton PRO	NA	NA	Maveriviricetes;Mividavirales;Sputniviroviridae	10.1093/nar/gkaa946 10.1128/mSystems.01020-20 10.1186/s40168-019-0768-5	10.46936/10.25585/60000748
IMG_VR_0336	IMGVR_UViG_3300006919_004756|3300006919|Ga0070746_10000489	IMG_VR v3	Metagenome	3300006919	Linear	23611	Clustered	IMG_VR_0331	NA	NA	NA	NA	NA	10.1093/nar/gkaa946 10.1128/mSystems.01020-20 10.1186/s40168-019-0768-5	10.46936/10.25585/60000748
IMG_VR_0337	IMGVR_UViG_3300006919_004757|3300006919|Ga0070746_10000980	IMG_VR v3	Metagenome	3300006919	Linear	17036	Seed	IMG_VR_0337	Partial	MCP Penton PRO	NA	NA	Maveriviricetes;Unclassified	10.1093/nar/gkaa946 10.1128/mSystems.01020-20 10.1186/s40168-019-0768-5	10.46936/10.25585/60000748
IMG_VR_0338	IMGVR_UViG_3300006919_004758|3300006919|Ga0070746_10001539	IMG_VR v3	Metagenome	3300006919	Linear	13754	Clustered	IMG_VR_0320	NA	NA	NA	NA	NA	10.1093/nar/gkaa946 10.1128/mSystems.01020-20 10.1186/s40168-019-0768-5	10.46936/10.25585/60000748
IMG_VR_0339	IMGVR_UViG_3300006919_004759|3300006919|Ga0070746_10001925	IMG_VR v3	Metagenome	3300006919	Linear	12343	Seed	IMG_VR_0339	Partial	ATPase MCP Penton PRO	NA	NA	Maveriviricetes;Mividavirales;Sputniviroviridae	10.1093/nar/gkaa946 10.1128/mSystems.01020-20 10.1186/s40168-019-0768-5	10.46936/10.25585/60000748
IMG_VR_0340	IMGVR_UViG_3300006919_004760|3300006919|Ga0070746_10002036	IMG_VR v3	Metagenome	3300006919	Linear	12026	Seed	IMG_VR_0340	Partial	ATPase MCP Penton PRO	NA	NA	Maveriviricetes;Mividavirales;Sputniviroviridae	10.1093/nar/gkaa946 10.1128/mSystems.01020-20 10.1186/s40168-019-0768-5	10.46936/10.25585/60000748
IMG_VR_0341	IMGVR_UViG_3300006919_004761|3300006919|Ga0070746_10002189	IMG_VR v3	Metagenome	3300006919	Linear	11590	Clustered	IMG_VR_0318	NA	NA	NA	NA	NA	10.1093/nar/gkaa946 10.1128/mSystems.01020-20 10.1186/s40168-019-0768-5	10.46936/10.25585/60000748
IMG_VR_0342	IMGVR_UViG_3300006919_004764|3300006919|Ga0070746_10006781	IMG_VR v3	Metagenome	3300006919	Linear	6623	Seed	IMG_VR_0342	Partial	ATPase MCP Penton	NA	NA	Maveriviricetes;Unclassified	10.1093/nar/gkaa946 10.1128/mSystems.01020-20 10.1186/s40168-019-0768-5	10.46936/10.25585/60000748
IMG_VR_0343	IMGVR_UViG_3300006919_004769|3300006919|Ga0070746_10011105	IMG_VR v3	Metagenome	3300006919	Linear	5098	Seed	IMG_VR_0343	Partial	MCP Penton PRO	NA	NA	Maveriviricetes;Mividavirales;Sputniviroviridae	10.1093/nar/gkaa946 10.1128/mSystems.01020-20 10.1186/s40168-019-0768-5	10.46936/10.25585/60000748
IMG_VR_0344	IMGVR_UViG_3300006920_002187|3300006920|Ga0070748_1000325	IMG_VR v3	Metagenome	3300006920	Linear	24159	Seed	IMG_VR_0344	Partial	ATPase MCP Penton PRO	NA	NA	Maveriviricetes;Mividavirales;Sputniviroviridae	10.1093/nar/gkaa946 10.1128/mSystems.01020-20 10.1186/s40168-019-0768-5	10.46936/10.25585/60000748
IMG_VR_0345	IMGVR_UViG_3300006920_002188|3300006920|Ga0070748_1000850	IMG_VR v3	Metagenome	3300006920	Linear	14342	Clustered	IMG_VR_0355	NA	NA	NA	NA	NA	10.1093/nar/gkaa946 10.1128/mSystems.01020-20 10.1186/s40168-019-0768-5	10.46936/10.25585/60000748
IMG_VR_0346	IMGVR_UViG_3300007074_000683|3300007074|Ga0075110_1001402	IMG_VR v3	Metagenome	3300007074	Linear	10238	Seed	IMG_VR_0346	Partial	ATPase MCP Penton	NA	NA	Maveriviricetes;Unclassified	10.1093/nar/gkaa946 10.1186/s40168-019-0768-5 10.1186/s40168-020-00889-8	10.46936/10.25585/60001034
IMG_VR_0347	IMGVR_UViG_3300007074_000684|3300007074|Ga0075110_1002153	IMG_VR v3	Metagenome	3300007074	Linear	7852	Seed	IMG_VR_0347	Partial	ATPase MCP Penton PRO	NA	NA	Maveriviricetes;Mividavirales;Sputniviroviridae	10.1093/nar/gkaa946 10.1186/s40168-019-0768-5 10.1186/s40168-020-00889-8	10.46936/10.25585/60001034
IMG_VR_0348	IMGVR_UViG_3300007162_000148|3300007162|Ga0079300_10000389	IMG_VR v3	Metagenome	3300007162	Linear	16477	Clustered	IMG_VR_1249	NA	NA	NA	NA	NA	10.1038/s41564-018-0312-6 10.1093/nar/gkaa946	10.46936/jejc.proj.2014.48483/60005501
IMG_VR_0349	IMGVR_UViG_3300007165_000136|3300007165|Ga0079302_1000453	IMG_VR v3	Metagenome	3300007165	Linear	10504	Clustered	IMG_VR_1249	NA	NA	NA	NA	NA	10.1038/s41564-018-0312-6 10.1093/nar/gkaa946	10.46936/jejc.proj.2014.48483/60005501
IMG_VR_0350	IMGVR_UViG_3300007169_000414|3300007169|Ga0102976_1048416	IMG_VR v3	Metagenome	3300007169	Linear	20958	Clustered	IMG_VR_0220	NA	NA	NA	NA	NA	10.1093/nar/gkaa946
IMG_VR_0351	IMGVR_UViG_3300007216_000140|3300007216|Ga0103961_1028702	IMG_VR v3	Metagenome	3300007216	Linear	28697	Seed	IMG_VR_0351	Near-complete	ATPase MCP Penton PRO	Group 003	Aquatic virophages 2	Maveriviricetes;Priklausovirales;Burtonviroviridae	10.1093/nar/gkaa946
IMG_VR_0352	IMGVR_UViG_3300007229_001262|3300007229|Ga0075468_10000167	IMG_VR v3	Metagenome	3300007229	Linear	23116	Clustered	IMG_VR_0344	NA	NA	NA	NA	NA	10.1093/nar/gkaa946 10.1128/mSystems.01020-20	10.46936/10.25585/60000748
IMG_VR_0353	IMGVR_UViG_3300007231_000603|3300007231|Ga0075469_10001281	IMG_VR v3	Metagenome	3300007231	Linear	11413	Clustered	IMG_VR_0344	NA	NA	NA	NA	NA	10.1093/nar/gkaa946 10.1128/mSystems.01020-20	10.46936/10.25585/60000748
IMG_VR_0354	IMGVR_UViG_3300007236_000866|3300007236|Ga0075463_10001666	IMG_VR v3	Metagenome	3300007236	Linear	7522	Clustered	IMG_VR_1240	NA	NA	NA	NA	NA	10.1093/nar/gkaa946 10.1128/mSystems.01020-20	10.46936/10.25585/60000748
IMG_VR_0355	IMGVR_UViG_3300007276_002641|3300007276|Ga0070747_1000780	IMG_VR v3	Metagenome	3300007276	Linear	15526	Seed	IMG_VR_0355	Partial	ATPase MCP Penton PRO	NA	NA	Maveriviricetes;Unclassified	10.1093/nar/gkaa946 10.1128/mSystems.01020-20 10.1186/s40168-019-0768-5	10.46936/10.25585/60000748
IMG_VR_0356	IMGVR_UViG_3300007344_002658|3300007344|Ga0070745_1000861	IMG_VR v3	Metagenome	3300007344	Linear	17392	Clustered	IMG_VR_0359	NA	NA	NA	NA	NA	10.1093/nar/gkaa946 10.1128/mSystems.01020-20 10.1186/s40168-019-0768-5	10.46936/10.25585/60000748
IMG_VR_0357	IMGVR_UViG_3300007344_002661|3300007344|Ga0070745_1001826	IMG_VR v3	Metagenome	3300007344	Linear	11644	Clustered	IMG_VR_0360	NA	NA	NA	NA	NA	10.1093/nar/gkaa946 10.1128/mSystems.01020-20 10.1186/s40168-019-0768-5	10.46936/10.25585/60000748
IMG_VR_0358	IMGVR_UViG_3300007344_002662|3300007344|Ga0070745_1002316	IMG_VR v3	Metagenome	3300007344	Linear	10250	Seed	IMG_VR_0358	Partial	ATPase MCP Penton PRO	NA	NA	Maveriviricetes;Mividavirales;Sputniviroviridae	10.1093/nar/gkaa946 10.1128/mSystems.01020-20 10.1186/s40168-019-0768-5	10.46936/10.25585/60000748
IMG_VR_0359	IMGVR_UViG_3300007345_002998|3300007345|Ga0070752_1001124	IMG_VR v3	Metagenome	3300007345	Linear	19481	Seed	IMG_VR_0359	Partial	ATPase MCP Penton PRO	NA	NA	Maveriviricetes;Priklausovirales;Omnilimnoviroviridae	10.1093/nar/gkaa946 10.1128/mSystems.01020-20 10.1186/s40168-019-0768-5	10.46936/10.25585/60000748
IMG_VR_0360	IMGVR_UViG_3300007346_002644|3300007346|Ga0070753_1000309	IMG_VR v3	Metagenome	3300007346	Linear	30385	Seed	IMG_VR_0360	Near-complete	ATPase MCP PRO	NA	NA	Maveriviricetes;Unclassified	10.1093/nar/gkaa946 10.1128/mSystems.01020-20	10.46936/10.25585/60000748
IMG_VR_0361	IMGVR_UViG_3300007346_002646|3300007346|Ga0070753_1005028	IMG_VR v3	Metagenome	3300007346	Linear	6675	Clustered	IMG_VR_0359	NA	NA	NA	NA	NA	10.1093/nar/gkaa946 10.1128/mSystems.01020-20	10.46936/10.25585/60000748
IMG_VR_0362	IMGVR_UViG_3300007346_002647|3300007346|Ga0070753_1005961	IMG_VR v3	Metagenome	3300007346	Linear	6058	Seed	IMG_VR_0362	Partial	ATPase MCP Penton PRO	NA	NA	Maveriviricetes;Mividavirales;Sputniviroviridae	10.1093/nar/gkaa946 10.1128/mSystems.01020-20	10.46936/10.25585/60000748
IMG_VR_0363	IMGVR_UViG_3300007363_000697|3300007363|Ga0075458_10000849	IMG_VR v3	Metagenome	3300007363	Linear	9975	Clustered	IMG_VR_0330	NA	NA	NA	NA	NA	10.1093/nar/gkaa946 10.1128/mSystems.01020-20	10.46936/10.25585/60000748
IMG_VR_0364	IMGVR_UViG_3300007363_000699|3300007363|Ga0075458_10001109	IMG_VR v3	Metagenome	3300007363	Linear	8833	Seed	IMG_VR_0364	Partial	ATPase MCP Penton PRO	NA	NA	Maveriviricetes;Mividavirales;Sputniviroviridae	10.1093/nar/gkaa946 10.1128/mSystems.01020-20	10.46936/10.25585/60000748
IMG_VR_0365	IMGVR_UViG_3300007516_000923|3300007516|Ga0105050_10007389	IMG_VR v3	Metagenome	3300007516	Linear	13145	Seed	IMG_VR_0365	Partial	ATPase MCP Penton PRO	NA	NA	Maveriviricetes;Priklausovirales;Burtonviroviridae	10.1093/nar/gkaa946 10.1186/s40168-019-0768-5	10.46936/10.25585/60000788
IMG_VR_0366	IMGVR_UViG_3300007516_000925|3300007516|Ga0105050_10008796	IMG_VR v3	Metagenome	3300007516	Linear	11512	Seed	IMG_VR_0366	Partial	MCP Penton PRO	NA	NA	Maveriviricetes;Priklausovirales;Burtonviroviridae	10.1093/nar/gkaa946 10.1186/s40168-019-0768-5	10.46936/10.25585/60000788
IMG_VR_0367	IMGVR_UViG_3300007519_000340|3300007519|Ga0105055_10020843	IMG_VR v3	Metagenome	3300007519	Linear	7450	Seed	IMG_VR_0367	Partial	ATPase MCP Penton PRO	NA	NA	Maveriviricetes;Unclassified	10.1093/nar/gkaa946 10.1101/2021.12.17.473166	10.46936/10.25585/60000788
IMG_VR_0368	IMGVR_UViG_3300007519_000343|3300007519|Ga0105055_10031621	IMG_VR v3	Metagenome	3300007519	Linear	5841	Seed	IMG_VR_0368	Partial	MCP Penton PRO	NA	NA	Maveriviricetes;Priklausovirales;Omnilimnoviroviridae	10.1093/nar/gkaa946 10.1101/2021.12.17.473166	10.46936/10.25585/60000788
IMG_VR_0369	IMGVR_UViG_3300007520_000308|3300007520|Ga0105054_10014422	IMG_VR v3	Metagenome	3300007520	Linear	9418	Seed	IMG_VR_0369	Partial	NA	NA	NA	NA	10.1093/nar/gkaa946 10.1101/2021.12.17.473166	10.46936/10.25585/60000788
IMG_VR_0370	IMGVR_UViG_3300007520_000309|3300007520|Ga0105054_10015318	IMG_VR v3	Metagenome	3300007520	Linear	9064	Seed	IMG_VR_0370	Partial	ATPase MCP Penton PRO	NA	NA	Maveriviricetes;Priklausovirales;Dishuiviroviridae	10.1093/nar/gkaa946 10.1101/2021.12.17.473166	10.46936/10.25585/60000788
IMG_VR_0371	IMGVR_UViG_3300007520_000310|3300007520|Ga0105054_10020112	IMG_VR v3	Metagenome	3300007520	Linear	7625	Clustered	IMG_VR_0372	NA	NA	NA	NA	NA	10.1093/nar/gkaa946 10.1101/2021.12.17.473166	10.46936/10.25585/60000788
IMG_VR_0372	IMGVR_UViG_3300007522_000299|3300007522|Ga0105053_10014577	IMG_VR v3	Metagenome	3300007522	Linear	9188	Seed	IMG_VR_0372	Partial	ATPase MCP Penton PRO	NA	NA	Maveriviricetes;Unclassified	10.1093/nar/gkaa946 10.1101/2021.12.17.473166	10.46936/10.25585/60000788
IMG_VR_0373	IMGVR_UViG_3300007538_002376|3300007538|Ga0099851_1000248	IMG_VR v3	Metagenome	3300007538	Linear	22392	Clustered	IMG_VR_1211	NA	NA	NA	NA	NA	10.1093/nar/gkaa946 10.1128/mSystems.01020-20 10.1186/s40168-019-0768-5	10.46936/10.25585/60000748
IMG_VR_0374	IMGVR_UViG_3300007538_002377|3300007538|Ga0099851_1001009	IMG_VR v3	Metagenome	3300007538	Linear	11904	Seed	IMG_VR_0374	Partial	ATPase MCP Penton PRO	NA	NA	Maveriviricetes;Mividavirales;Sputniviroviridae	10.1093/nar/gkaa946 10.1128/mSystems.01020-20 10.1186/s40168-019-0768-5	10.46936/10.25585/60000748
IMG_VR_0375	IMGVR_UViG_3300007538_002378|3300007538|Ga0099851_1001478	IMG_VR v3	Metagenome	3300007538	Linear	9925	Clustered	IMG_VR_1213	NA	NA	NA	NA	NA	10.1093/nar/gkaa946 10.1128/mSystems.01020-20 10.1186/s40168-019-0768-5	10.46936/10.25585/60000748
IMG_VR_0376	IMGVR_UViG_3300007538_002379|3300007538|Ga0099851_1002466	IMG_VR v3	Metagenome	3300007538	Linear	7834	Clustered	IMG_VR_0391	NA	NA	NA	NA	NA	10.1093/nar/gkaa946 10.1128/mSystems.01020-20 10.1186/s40168-019-0768-5	10.46936/10.25585/60000748
IMG_VR_0377	IMGVR_UViG_3300007538_002381|3300007538|Ga0099851_1005225	IMG_VR v3	Metagenome	3300007538	Linear	5450	Clustered	IMG_VR_0392	NA	NA	NA	NA	NA	10.1093/nar/gkaa946 10.1128/mSystems.01020-20 10.1186/s40168-019-0768-5	10.46936/10.25585/60000748
IMG_VR_0378	IMGVR_UViG_3300007539_002840|3300007539|Ga0099849_1005059	IMG_VR v3	Metagenome	3300007539	Linear	6034	Clustered	IMG_VR_1221	NA	NA	NA	NA	NA	10.1093/nar/gkaa946 10.1128/mSystems.01020-20	10.46936/10.25585/60000748
IMG_VR_0379	IMGVR_UViG_3300007539_002841|3300007539|Ga0099849_1005488	IMG_VR v3	Metagenome	3300007539	Linear	5795	Clustered	IMG_VR_1222	NA	NA	NA	NA	NA	10.1093/nar/gkaa946 10.1128/mSystems.01020-20	10.46936/10.25585/60000748
IMG_VR_0380	IMGVR_UViG_3300007540_001763|3300007540|Ga0099847_1000087	IMG_VR v3	Metagenome	3300007540	DTR	26512	Seed	IMG_VR_0380	Complete	ATPase MCP Penton PRO	Group 001	Aquatic virophages 1	Maveriviricetes;Priklausovirales;Omnilimnoviroviridae	10.1093/nar/gkaa946 10.1128/mSystems.01020-20 10.1186/s40168-019-0768-5	10.46936/10.25585/60000748
IMG_VR_0381	IMGVR_UViG_3300007540_001764|3300007540|Ga0099847_1000567	IMG_VR v3	Metagenome	3300007540	Linear	12540	Seed	IMG_VR_0381	Partial	ATPase MCP Penton PRO	NA	NA	Maveriviricetes;Priklausovirales;Omnilimnoviroviridae	10.1093/nar/gkaa946 10.1128/mSystems.01020-20 10.1186/s40168-019-0768-5	10.46936/10.25585/60000748
IMG_VR_0382	IMGVR_UViG_3300007540_001765|3300007540|Ga0099847_1000701	IMG_VR v3	Metagenome	3300007540	Linear	11413	Seed	IMG_VR_0382	Partial	ATPase MCP Penton	NA	NA	Maveriviricetes;Priklausovirales;Omnilimnoviroviridae	10.1093/nar/gkaa946 10.1128/mSystems.01020-20 10.1186/s40168-019-0768-5	10.46936/10.25585/60000748
IMG_VR_0383	IMGVR_UViG_3300007541_000461|3300007541|Ga0099848_1000588	IMG_VR v3	Metagenome	3300007541	Linear	17098	Seed	IMG_VR_0383	Partial	NA	NA	NA	NA	10.1093/nar/gkaa946 10.1128/mSystems.01020-20 10.1186/s40168-019-0768-5	10.46936/10.25585/60000748
IMG_VR_0384	IMGVR_UViG_3300007541_000782|3300007541|Ga0099848_1001120	IMG_VR v3	Metagenome	3300007541	Linear	12565	Clustered	IMG_VR_1210	NA	NA	NA	NA	NA	10.1093/nar/gkaa946 10.1128/mSystems.01020-20 10.1186/s40168-019-0768-5	10.46936/10.25585/60000748
IMG_VR_0385	IMGVR_UViG_3300007541_001149|3300007541|Ga0099848_1001881	IMG_VR v3	Metagenome	3300007541	Linear	9813	Seed	IMG_VR_0385	Partial	NA	NA	NA	NA	10.1093/nar/gkaa946 10.1128/mSystems.01020-20 10.1186/s40168-019-0768-5	10.46936/10.25585/60000748
IMG_VR_0386	IMGVR_UViG_3300007541_002644|3300007541|Ga0099848_1000221	IMG_VR v3	Metagenome	3300007541	DTR	25346	Seed	IMG_VR_0386	Complete	ATPase MCP Penton PRO	Group 002	Sputnik virophages	Maveriviricetes;Mividavirales;Sputniviroviridae	10.1093/nar/gkaa946 10.1128/mSystems.01020-20 10.1186/s40168-019-0768-5	10.46936/10.25585/60000748
IMG_VR_0387	IMGVR_UViG_3300007541_002645|3300007541|Ga0099848_1000293	IMG_VR v3	Metagenome	3300007541	Linear	22392	Clustered	IMG_VR_1211	NA	NA	NA	NA	NA	10.1093/nar/gkaa946 10.1128/mSystems.01020-20 10.1186/s40168-019-0768-5	10.46936/10.25585/60000748
IMG_VR_0388	IMGVR_UViG_3300007541_002646|3300007541|Ga0099848_1000347	IMG_VR v3	Metagenome	3300007541	Linear	21278	Seed	IMG_VR_0388	Partial	ATPase MCP Penton PRO	NA	NA	Maveriviricetes;Unclassified	10.1093/nar/gkaa946 10.1128/mSystems.01020-20 10.1186/s40168-019-0768-5	10.46936/10.25585/60000748
IMG_VR_0389	IMGVR_UViG_3300007541_002650|3300007541|Ga0099848_1004289	IMG_VR v3	Metagenome	3300007541	Linear	6560	Seed	IMG_VR_0389	Partial	MCP Penton PRO	NA	NA	Maveriviricetes;Unclassified	10.1093/nar/gkaa946 10.1128/mSystems.01020-20 10.1186/s40168-019-0768-5	10.46936/10.25585/60000748
IMG_VR_0390	IMGVR_UViG_3300007542_002288|3300007542|Ga0099846_1000455	IMG_VR v3	Metagenome	3300007542	Linear	17019	Clustered	IMG_VR_1211	NA	NA	NA	NA	NA	10.1093/nar/gkaa946 10.1128/mSystems.01020-20 10.1186/s40168-019-0768-5	10.46936/10.25585/60000748
IMG_VR_0391	IMGVR_UViG_3300007542_002289|3300007542|Ga0099846_1001258	IMG_VR v3	Metagenome	3300007542	Linear	10552	Seed	IMG_VR_0391	Partial	ATPase MCP Penton PRO	NA	NA	Maveriviricetes;Mividavirales;Sputniviroviridae	10.1093/nar/gkaa946 10.1128/mSystems.01020-20 10.1186/s40168-019-0768-5	10.46936/10.25585/60000748
IMG_VR_0392	IMGVR_UViG_3300007542_002291|3300007542|Ga0099846_1003729	IMG_VR v3	Metagenome	3300007542	Linear	6210	Seed	IMG_VR_0392	Partial	MCP Penton PRO	NA	NA	Maveriviricetes;Priklausovirales;Omnilimnoviroviridae	10.1093/nar/gkaa946 10.1128/mSystems.01020-20 10.1186/s40168-019-0768-5	10.46936/10.25585/60000748
IMG_VR_0393	IMGVR_UViG_3300007559_000229|3300007559|Ga0102828_1000286	IMG_VR v3	Metagenome	3300007559	Linear	9265	Clustered	IMG_VR_1160	NA	NA	NA	NA	NA	10.1093/nar/gkaa946	10.46936/10.25585/60000867
IMG_VR_0394	IMGVR_UViG_3300007609_000565|3300007609|Ga0102945_1000484	IMG_VR v3	Metagenome	3300007609	Linear	12048	Seed	IMG_VR_0394	Partial	ATPase MCP Penton PRO	NA	NA	Maveriviricetes;Unclassified	10.1038/s41396-021-01067-w 10.1093/nar/gkaa946 10.1186/s40168-019-0768-5	10.46936/10.25585/60000820
IMG_VR_0395	IMGVR_UViG_3300007628_000040|3300007628|Ga0102937_1003720	IMG_VR v3	Metagenome	3300007628	Linear	6684	Clustered	IMG_VR_0396	NA	NA	NA	NA	NA	10.1038/s41396-021-01067-w 10.1093/nar/gkaa946	10.46936/10.25585/60000820
IMG_VR_0396	IMGVR_UViG_3300007633_000048|3300007633|Ga0102940_1002147	IMG_VR v3	Metagenome	3300007633	Linear	12063	Seed	IMG_VR_0396	Partial	ATPase MCP Penton PRO	NA	NA	Maveriviricetes;Mividavirales;Sputniviroviridae	10.1038/s41396-021-01067-w 10.1093/nar/gkaa946 10.1186/s40168-019-0768-5	10.46936/10.25585/60000820
IMG_VR_0397	IMGVR_UViG_3300007633_000049|3300007633|Ga0102940_1009505	IMG_VR v3	Metagenome	3300007633	Linear	5158	Seed	IMG_VR_0397	Partial	ATPase MCP Penton	NA	NA	Maveriviricetes;Unclassified	10.1038/s41396-021-01067-w 10.1093/nar/gkaa946 10.1186/s40168-019-0768-5	10.46936/10.25585/60000820
IMG_VR_0398	IMGVR_UViG_3300007640_002830|3300007640|Ga0070751_1001147	IMG_VR v3	Metagenome	3300007640	Linear	15835	Clustered	IMG_VR_0360	NA	NA	NA	NA	NA	10.1093/nar/gkaa946 10.1128/mSystems.01020-20 10.1186/s40168-019-0768-5	10.46936/10.25585/60000748
IMG_VR_0399	IMGVR_UViG_3300007640_002831|3300007640|Ga0070751_1001973	IMG_VR v3	Metagenome	3300007640	Linear	11812	Seed	IMG_VR_0399	Partial	ATPase MCP Penton PRO	NA	NA	Maveriviricetes;Unclassified	10.1093/nar/gkaa946 10.1128/mSystems.01020-20 10.1186/s40168-019-0768-5	10.46936/10.25585/60000748
IMG_VR_0400	IMGVR_UViG_3300007640_002834|3300007640|Ga0070751_1004094	IMG_VR v3	Metagenome	3300007640	Linear	8036	Clustered	IMG_VR_0328	NA	NA	NA	NA	NA	10.1093/nar/gkaa946 10.1128/mSystems.01020-20 10.1186/s40168-019-0768-5	10.46936/10.25585/60000748
IMG_VR_0401	IMGVR_UViG_3300007642_000152|3300007642|Ga0102876_1000639	IMG_VR v3	Metagenome	3300007642	Linear	10952	Seed	IMG_VR_0401	Partial	MCP Penton PRO	NA	NA	Maveriviricetes;Priklausovirales;Burtonviroviridae	10.1093/nar/gkaa946	10.46936/10.25585/60000867
IMG_VR_0402	IMGVR_UViG_3300007708_000175|3300007708|Ga0102859_1001403	IMG_VR v3	Metagenome	3300007708	Linear	5491	Clustered	IMG_VR_1540	NA	NA	NA	NA	NA	10.1093/nar/gkaa946	10.46936/10.25585/60000867
IMG_VR_0403	IMGVR_UViG_3300007722_000667|3300007722|Ga0105051_10017277	IMG_VR v3	Metagenome	3300007722	Linear	6327	Seed	IMG_VR_0403	Partial	MCP Penton PRO	NA	NA	Maveriviricetes;Priklausovirales;Burtonviroviridae	10.1093/nar/gkaa946	10.46936/10.25585/60000788
IMG_VR_0404	IMGVR_UViG_3300007722_000668|3300007722|Ga0105051_10017688	IMG_VR v3	Metagenome	3300007722	Linear	6272	Clustered	IMG_VR_0366	NA	NA	NA	NA	NA	10.1093/nar/gkaa946	10.46936/10.25585/60000788
IMG_VR_0405	IMGVR_UViG_3300007734_000387|3300007734|Ga0104986_1573	IMG_VR v3	Metagenome	3300007734	Linear	18055	Seed	IMG_VR_0405	Partial	ATPase MCP Penton PRO	NA	NA	Maveriviricetes;Priklausovirales;Burtonviroviridae	10.1093/nar/gkaa946
IMG_VR_0406	IMGVR_UViG_3300007734_000520|3300007734|Ga0104986_1721	IMG_VR v3	Metagenome	3300007734	DTR	25688	Seed	IMG_VR_0406	Complete	ATPase MCP Penton PRO	Group 004	SW01 virophages	Maveriviricetes;Priklausovirales;Dishuiviroviridae	10.1093/nar/gkaa946
IMG_VR_0407	IMGVR_UViG_3300007734_000542|3300007734|Ga0104986_1748	IMG_VR v3	Metagenome	3300007734	Linear	28183	Seed	IMG_VR_0407	Near-complete	ATPase MCP Penton PRO	Group 003	Aquatic virophages 2	Maveriviricetes;Priklausovirales;Burtonviroviridae	10.1093/nar/gkaa946
IMG_VR_0408	IMGVR_UViG_3300007735_000096|3300007735|Ga0104988_10177	IMG_VR v3	Metagenome	3300007735	Linear	11479	Seed	IMG_VR_0408	Partial	ATPase MCP Penton PRO	NA	NA	Maveriviricetes;Mividavirales;Sputniviroviridae	10.1093/nar/gkaa946
IMG_VR_0409	IMGVR_UViG_3300007735_000459|3300007735|Ga0104988_10653	IMG_VR v3	Metagenome	3300007735	Linear	20886	Seed	IMG_VR_0409	Partial	ATPase MCP Penton PRO	NA	NA	Maveriviricetes;Priklausovirales;Burtonviroviridae	10.1093/nar/gkaa946
IMG_VR_0410	IMGVR_UViG_3300007735_000535|3300007735|Ga0104988_10741	IMG_VR v3	Metagenome	3300007735	DTR	25673	Clustered	IMG_VR_0406	NA	NA	NA	NA	NA	10.1093/nar/gkaa946
IMG_VR_0411	IMGVR_UViG_3300007735_000547|3300007735|Ga0104988_10753	IMG_VR v3	Metagenome	3300007735	DTR	26157	Seed	IMG_VR_0411	Complete	ATPase MCP Penton PRO	Group 003	Aquatic virophages 2	Maveriviricetes;Priklausovirales;Burtonviroviridae	10.1093/nar/gkaa946
IMG_VR_0412	IMGVR_UViG_3300007735_000638|3300007735|Ga0104988_10848	IMG_VR v3	Metagenome	3300007735	Linear	33407	Seed	IMG_VR_0412	Near-complete	ATPase MCP Penton PRO	Group 004	SW01 virophages	Maveriviricetes;Priklausovirales;Dishuiviroviridae	10.1093/nar/gkaa946
IMG_VR_0413	IMGVR_UViG_3300007960_002526|3300007960|Ga0099850_1000274	IMG_VR v3	Metagenome	3300007960	Linear	22392	Clustered	IMG_VR_1211	NA	NA	NA	NA	NA	10.1093/nar/gkaa946 10.1128/mSystems.01020-20	10.46936/10.25585/60000748
IMG_VR_0414	IMGVR_UViG_3300007960_002528|3300007960|Ga0099850_1004292	IMG_VR v3	Metagenome	3300007960	Linear	6676	Seed	IMG_VR_0414	Partial	MCP Penton PRO	NA	NA	Maveriviricetes;Mividavirales;Sputniviroviridae	10.1093/nar/gkaa946 10.1128/mSystems.01020-20	10.46936/10.25585/60000748
IMG_VR_0415	IMGVR_UViG_3300008012_002395|3300008012|Ga0075480_10011953	IMG_VR v3	Metagenome	3300008012	Linear	5425	Clustered	IMG_VR_0362	NA	NA	NA	NA	NA	10.1093/nar/gkaa946 10.1128/mSystems.01020-20	10.46936/10.25585/60000748
IMG_VR_0416	IMGVR_UViG_3300008050_002174|3300008050|Ga0098052_1006943	IMG_VR v3	Metagenome	3300008050	Linear	6178	Seed	IMG_VR_0416	Partial	ATPase MCP Penton PRO	NA	NA	Maveriviricetes;Priklausovirales;Burtonviroviridae	10.1038/s41396-020-00825-6 10.1093/nar/gkaa946	10.46936/10.25585/60007217
IMG_VR_0417	IMGVR_UViG_3300008107_000450|3300008107|Ga0114340_1000709	IMG_VR v3	Metagenome	3300008107	Linear	29707	Clustered	IMG_VR_0420	NA	NA	NA	NA	NA	10.1093/nar/gkaa946
IMG_VR_0418	IMGVR_UViG_3300008108_000286|3300008108|Ga0114341_10001264	IMG_VR v3	Metagenome	3300008108	Linear	26748	Clustered	IMG_VR_0420	NA	NA	NA	NA	NA	10.1093/nar/gkaa946
IMG_VR_0419	IMGVR_UViG_3300008110_000285|3300008110|Ga0114343_1000409	IMG_VR v3	Metagenome	3300008110	Linear	29942	Clustered	IMG_VR_0420	NA	NA	NA	NA	NA	10.1093/nar/gkaa946
IMG_VR_0420	IMGVR_UViG_3300008111_000074|3300008111|Ga0114344_1000210	IMG_VR v3	Metagenome	3300008111	Linear	30478	Seed	IMG_VR_0420	Near-complete	ATPase MCP Penton PRO	Group 004	SW01 virophages	Maveriviricetes;Priklausovirales;Dishuiviroviridae	10.1093/nar/gkaa946
IMG_VR_0421	IMGVR_UViG_3300008113_000268|3300008113|Ga0114346_1000499	IMG_VR v3	Metagenome	3300008113	Linear	28985	Clustered	IMG_VR_0420	NA	NA	NA	NA	NA	10.1093/nar/gkaa946
IMG_VR_0422	IMGVR_UViG_3300008114_000115|3300008114|Ga0114347_1000509	IMG_VR v3	Metagenome	3300008114	Linear	28595	Clustered	IMG_VR_0420	NA	NA	NA	NA	NA	10.1093/nar/gkaa946
IMG_VR_0423	IMGVR_UViG_3300008114_000365|3300008114|Ga0114347_1002052	IMG_VR v3	Metagenome	3300008114	Linear	21613	Seed	IMG_VR_0423	Partial	ATPase MCP Penton PRO	NA	NA	Maveriviricetes;Unclassified	10.1093/nar/gkaa946
IMG_VR_0424	IMGVR_UViG_3300008114_000744|3300008114|Ga0114347_1005653	IMG_VR v3	Metagenome	3300008114	Linear	21461	Seed	IMG_VR_0424	Partial	ATPase MCP Penton	NA	NA	Maveriviricetes;Priklausovirales;Dishuiviroviridae	10.1093/nar/gkaa946
IMG_VR_0425	IMGVR_UViG_3300008116_000178|3300008116|Ga0114350_1000325	IMG_VR v3	Metagenome	3300008116	Linear	30363	Clustered	IMG_VR_0420	NA	NA	NA	NA	NA	10.1093/nar/gkaa946
IMG_VR_0426	IMGVR_UViG_3300008117_000230|3300008117|Ga0114351_1000781	IMG_VR v3	Metagenome	3300008117	Linear	28396	Clustered	IMG_VR_0420	NA	NA	NA	NA	NA	10.1093/nar/gkaa946
IMG_VR_0427	IMGVR_UViG_3300008218_000660|3300008218|Ga0114904_1000260	IMG_VR v3	Metagenome	3300008218	Linear	30396	Clustered	PE_179	NA	NA	NA	NA	NA	10.1093/nar/gkaa946	10.46936/10.25585/60000616
IMG_VR_0428	IMGVR_UViG_3300008219_001061|3300008219|Ga0114905_1000607	IMG_VR v3	Metagenome	3300008219	Linear	22141	Clustered	PE_179	NA	NA	NA	NA	NA	10.1093/nar/gkaa946	10.46936/10.25585/60000616
IMG_VR_0429	IMGVR_UViG_3300008220_000852|3300008220|Ga0114910_1000457	IMG_VR v3	Metagenome	3300008220	Linear	20608	Clustered	PE_179	NA	NA	NA	NA	NA	10.1093/nar/gkaa946	10.46936/10.25585/60000616
IMG_VR_0430	IMGVR_UViG_3300008259_000112|3300008259|Ga0114841_1000299	IMG_VR v3	Metagenome	3300008259	Linear	30040	Clustered	IMG_VR_0420	NA	NA	NA	NA	NA	10.1093/nar/gkaa946
IMG_VR_0431	IMGVR_UViG_3300008262_000399|3300008262|Ga0114337_1001553	IMG_VR v3	Metagenome	3300008262	Linear	27423	Clustered	IMG_VR_0420	NA	NA	NA	NA	NA	10.1093/nar/gkaa946
IMG_VR_0432	IMGVR_UViG_3300008264_000033|3300008264|Ga0114353_1000226	IMG_VR v3	Metagenome	3300008264	Linear	30175	Clustered	IMG_VR_0420	NA	NA	NA	NA	NA	10.1093/nar/gkaa946
IMG_VR_0433	IMGVR_UViG_3300008266_000360|3300008266|Ga0114363_1000405	IMG_VR v3	Metagenome	3300008266	Linear	28200	Clustered	IMG_VR_0420	NA	NA	NA	NA	NA	10.1093/nar/gkaa946
IMG_VR_0434	IMGVR_UViG_3300008339_000371|3300008339|Ga0114878_1000429	IMG_VR v3	Metagenome	3300008339	Linear	28200	Clustered	IMG_VR_0420	NA	NA	NA	NA	NA	10.1093/nar/gkaa946
IMG_VR_0435	IMGVR_UViG_3300008450_000341|3300008450|Ga0114880_1000396	IMG_VR v3	Metagenome	3300008450	Linear	28404	Clustered	IMG_VR_0420	NA	NA	NA	NA	NA	10.1093/nar/gkaa946
IMG_VR_0436	IMGVR_UViG_3300008451_000627|3300008451|Ga0114881_102516	IMG_VR v3	Metagenome	3300008451	Linear	28404	Clustered	IMG_VR_0420	NA	NA	NA	NA	NA	10.1093/nar/gkaa946
IMG_VR_0437	IMGVR_UViG_3300008954_000751|3300008954|Ga0115650_1017156	IMG_VR v3	Metagenome	3300008954	Linear	8926	Seed	IMG_VR_0437	Partial	ATPase MCP Penton PRO	NA	NA	Maveriviricetes;Priklausovirales;Burtonviroviridae	10.1093/nar/gkaa946
IMG_VR_0438	IMGVR_UViG_3300009001_001149|3300009001|Ga0102963_1001410	IMG_VR v3	Metagenome	3300009001	Linear	10581	Seed	IMG_VR_0438	Partial	ATPase MCP Penton PRO	NA	NA	Maveriviricetes;Unclassified	10.1038/s41396-021-01067-w 10.1093/nar/gkaa946 10.1186/s40168-019-0768-5	10.46936/10.25585/60000820
IMG_VR_0439	IMGVR_UViG_3300009026_000487|3300009026|Ga0102829_1000633	IMG_VR v3	Metagenome	3300009026	Linear	10183	Seed	IMG_VR_0439	Partial	MCP Penton PRO	NA	NA	Maveriviricetes;Priklausovirales;Gulliviroviridae	10.1093/nar/gkaa946	10.46936/10.25585/60000867
IMG_VR_0440	IMGVR_UViG_3300009068_001139|3300009068|Ga0114973_10000565	IMG_VR v3	Metagenome	3300009068	Linear	28275	Seed	IMG_VR_0440	Near-complete	ATPase MCP Penton PRO	Group 003	Aquatic virophages 2	Maveriviricetes;Priklausovirales;Burtonviroviridae	10.1093/nar/gkaa946 10.1186/s40168-019-0768-5	10.46936/10.25585/60000587
IMG_VR_0441	IMGVR_UViG_3300009068_001140|3300009068|Ga0114973_10000639	IMG_VR v3	Metagenome	3300009068	DTR	26286	Seed	IMG_VR_0441	Complete	ATPase MCP Penton PRO	Group 003	Aquatic virophages 2	Maveriviricetes;Priklausovirales;Burtonviroviridae	10.1093/nar/gkaa946 10.1186/s40168-019-0768-5	10.46936/10.25585/60000587
IMG_VR_0442	IMGVR_UViG_3300009068_001141|3300009068|Ga0114973_10000749	IMG_VR v3	Metagenome	3300009068	DTR	24311	Seed	IMG_VR_0442	Complete	ATPase MCP Penton PRO	Group 003	Aquatic virophages 2	Maveriviricetes;Priklausovirales;Burtonviroviridae	10.1093/nar/gkaa946 10.1186/s40168-019-0768-5	10.46936/10.25585/60000587
IMG_VR_0443	IMGVR_UViG_3300009068_001142|3300009068|Ga0114973_10000850	IMG_VR v3	Metagenome	3300009068	Linear	22943	Clustered	IMG_VR_0584	NA	NA	NA	NA	NA	10.1093/nar/gkaa946 10.1186/s40168-019-0768-5	10.46936/10.25585/60000587
IMG_VR_0444	IMGVR_UViG_3300009068_001143|3300009068|Ga0114973_10001071	IMG_VR v3	Metagenome	3300009068	Linear	20466	Seed	IMG_VR_0444	Partial	ATPase MCP Penton PRO	NA	NA	Maveriviricetes;Priklausovirales;Burtonviroviridae	10.1093/nar/gkaa946 10.1186/s40168-019-0768-5	10.46936/10.25585/60000587
IMG_VR_0445	IMGVR_UViG_3300009068_001144|3300009068|Ga0114973_10001517	IMG_VR v3	Metagenome	3300009068	Linear	17269	Seed	IMG_VR_0445	Partial	MCP Penton PRO	NA	NA	Maveriviricetes;Priklausovirales;Burtonviroviridae	10.1093/nar/gkaa946 10.1186/s40168-019-0768-5	10.46936/10.25585/60000587
IMG_VR_0446	IMGVR_UViG_3300009070_000049|3300009070|Ga0066256_1001637|9300-29370	IMG_VR v3	Metagenome	3300009070	Integrated	20071	Seed	IMG_VR_0446	Partial	ATPase MCP Penton PRO	NA	NA	Maveriviricetes;Unclassified	10.1021/acs.est.6b04477 10.1093/nar/gkaa946 10.1111/1462-2920.12936 10.1186/s40168-019-0768-5	10.46936/10.25585/60000685
IMG_VR_0447	IMGVR_UViG_3300009070_000050|3300009070|Ga0066256_1002141|1-12600	IMG_VR v3	Metagenome	3300009070	Integrated	12600	Clustered	IMG_VR_1033	NA	NA	NA	NA	NA	10.1021/acs.est.6b04477 10.1093/nar/gkaa946 10.1111/1462-2920.12936 10.1186/s40168-019-0768-5	10.46936/10.25585/60000685
IMG_VR_0448	IMGVR_UViG_3300009070_000051|3300009070|Ga0066256_1002412	IMG_VR v3	Metagenome	3300009070	Linear	20798	Seed	IMG_VR_0448	Partial	ATPase MCP Penton PRO	NA	NA	Maveriviricetes;Priklausovirales;Dishuiviroviridae	10.1021/acs.est.6b04477 10.1093/nar/gkaa946 10.1111/1462-2920.12936 10.1186/s40168-019-0768-5	10.46936/10.25585/60000685
IMG_VR_0449	IMGVR_UViG_3300009070_000052|3300009070|Ga0066256_1003444	IMG_VR v3	Metagenome	3300009070	Linear	15282	Seed	IMG_VR_0449	Partial	ATPase MCP Penton PRO	NA	NA	Maveriviricetes;Unclassified	10.1021/acs.est.6b04477 10.1093/nar/gkaa946 10.1111/1462-2920.12936 10.1186/s40168-019-0768-5	10.46936/10.25585/60000685
IMG_VR_0450	IMGVR_UViG_3300009070_000053|3300009070|Ga0066256_1006347	IMG_VR v3	Metagenome	3300009070	Linear	9305	Seed	IMG_VR_0450	Partial	ATPase MCP Penton PRO	NA	NA	Maveriviricetes;Priklausovirales;Dishuiviroviridae	10.1021/acs.est.6b04477 10.1093/nar/gkaa946 10.1111/1462-2920.12936 10.1186/s40168-019-0768-5	10.46936/10.25585/60000685
IMG_VR_0451	IMGVR_UViG_3300009085_000340|3300009085|Ga0105103_10000524	IMG_VR v3	Metagenome	3300009085	Linear	21716	Seed	IMG_VR_0451	Partial	ATPase MCP Penton PRO	NA	NA	Maveriviricetes;Unclassified	10.1093/nar/gkaa946 10.1186/s40168-019-0768-5	10.46936/10.25585/60000718
IMG_VR_0452	IMGVR_UViG_3300009085_000341|3300009085|Ga0105103_10000772	IMG_VR v3	Metagenome	3300009085	DTR	17960	Seed	IMG_VR_0452	Complete	ATPase MCP Penton PRO	NA	NA	Maveriviricetes;Unclassified	10.1093/nar/gkaa946 10.1186/s40168-019-0768-5	10.46936/10.25585/60000718
IMG_VR_0453	IMGVR_UViG_3300009091_000158|3300009091|Ga0102851_10000522	IMG_VR v3	Metagenome	3300009091	DTR	19440	Seed	IMG_VR_0453	Complete	ATPase MCP Penton PRO	Group 002	Sputnik virophages	Maveriviricetes;Mividavirales;Sputniviroviridae	10.1038/s41467-017-01753-4 10.1093/nar/gkaa946 10.1186/s40168-019-0768-5	10.46936/10.25585/60000713
IMG_VR_0454	IMGVR_UViG_3300009091_000159|3300009091|Ga0102851_10002208	IMG_VR v3	Metagenome	3300009091	Linear	11654	Seed	IMG_VR_0454	Partial	ATPase MCP Penton PRO	NA	NA	Maveriviricetes;Mividavirales;Sputniviroviridae	10.1038/s41467-017-01753-4 10.1093/nar/gkaa946 10.1186/s40168-019-0768-5	10.46936/10.25585/60000713
IMG_VR_0455	IMGVR_UViG_3300009111_000074|3300009111|Ga0115026_10000109	IMG_VR v3	Metagenome	3300009111	ITR	16387	Seed	IMG_VR_0455	Complete	ATPase MCP Penton PRO	Group 002	Sputnik virophages	Maveriviricetes;Mividavirales;Sputniviroviridae	10.1038/s41467-017-01753-4 10.1093/nar/gkaa946 10.1186/s40168-019-0768-5	10.46936/10.25585/60000596
IMG_VR_0456	IMGVR_UViG_3300009111_000075|3300009111|Ga0115026_10002123	IMG_VR v3	Metagenome	3300009111	Linear	6976	Seed	IMG_VR_0456	Partial	ATPase MCP Penton	NA	NA	Maveriviricetes;Mividavirales;Sputniviroviridae	10.1038/s41467-017-01753-4 10.1093/nar/gkaa946 10.1186/s40168-019-0768-5	10.46936/10.25585/60000596
IMG_VR_0457	IMGVR_UViG_3300009151_002283|3300009151|Ga0114962_10000344|7050-40371	IMG_VR v3	Metagenome	3300009151	Integrated	33322	Seed	IMG_VR_0457	Near-complete	ATPase MCP Penton	NA	NA	Maveriviricetes;Unclassified	10.1093/nar/gkaa946 10.1186/s40168-019-0768-5	10.46936/10.25585/60000587
IMG_VR_0458	IMGVR_UViG_3300009151_002284|3300009151|Ga0114962_10000635	IMG_VR v3	Metagenome	3300009151	Linear	30729	Clustered	IMG_VR_0767	NA	NA	NA	NA	NA	10.1093/nar/gkaa946 10.1186/s40168-019-0768-5	10.46936/10.25585/60000587
IMG_VR_0459	IMGVR_UViG_3300009151_002285|3300009151|Ga0114962_10000711	IMG_VR v3	Metagenome	3300009151	Linear	29203	Clustered	IMG_VR_1277	NA	NA	NA	NA	NA	10.1093/nar/gkaa946 10.1186/s40168-019-0768-5	10.46936/10.25585/60000587
IMG_VR_0460	IMGVR_UViG_3300009151_002286|3300009151|Ga0114962_10000771	IMG_VR v3	Metagenome	3300009151	Linear	27919	Clustered	IMG_VR_1276	NA	NA	NA	NA	NA	10.1093/nar/gkaa946 10.1186/s40168-019-0768-5	10.46936/10.25585/60000587
IMG_VR_0461	IMGVR_UViG_3300009151_002287|3300009151|Ga0114962_10000779	IMG_VR v3	Metagenome	3300009151	Linear	27756	Seed	IMG_VR_0461	Near-complete	ATPase MCP Penton PRO	Group 003	Aquatic virophages 2	Maveriviricetes;Priklausovirales;Burtonviroviridae	10.1093/nar/gkaa946 10.1186/s40168-019-0768-5	10.46936/10.25585/60000587
IMG_VR_0462	IMGVR_UViG_3300009151_002288|3300009151|Ga0114962_10000818	IMG_VR v3	Metagenome	3300009151	DTR	27029	Seed	IMG_VR_0462	Complete	ATPase MCP Penton PRO	Group 003	Aquatic virophages 2	Maveriviricetes;Priklausovirales;Burtonviroviridae	10.1093/nar/gkaa946 10.1186/s40168-019-0768-5	10.46936/10.25585/60000587
IMG_VR_0463	IMGVR_UViG_3300009151_002289|3300009151|Ga0114962_10000821	IMG_VR v3	Metagenome	3300009151	Linear	27085	Clustered	IMG_VR_0774	NA	NA	NA	NA	NA	10.1093/nar/gkaa946 10.1186/s40168-019-0768-5	10.46936/10.25585/60000587
IMG_VR_0464	IMGVR_UViG_3300009151_002290|3300009151|Ga0114962_10000842	IMG_VR v3	Metagenome	3300009151	DTR	26553	Seed	IMG_VR_0464	Complete	ATPase MCP Penton PRO	NA	NA	Maveriviricetes;Priklausovirales;Burtonviroviridae	10.1093/nar/gkaa946 10.1186/s40168-019-0768-5	10.46936/10.25585/60000587
IMG_VR_0465	IMGVR_UViG_3300009151_002291|3300009151|Ga0114962_10000866	IMG_VR v3	Metagenome	3300009151	Linear	26245	Clustered	IMG_VR_0765	NA	NA	NA	NA	NA	10.1093/nar/gkaa946 10.1186/s40168-019-0768-5	10.46936/10.25585/60000587
IMG_VR_0466	IMGVR_UViG_3300009151_002292|3300009151|Ga0114962_10001122	IMG_VR v3	Metagenome	3300009151	Linear	23321	Clustered	IMG_VR_0802	NA	NA	NA	NA	NA	10.1093/nar/gkaa946 10.1186/s40168-019-0768-5	10.46936/10.25585/60000587
IMG_VR_0467	IMGVR_UViG_3300009151_002293|3300009151|Ga0114962_10001148	IMG_VR v3	Metagenome	3300009151	Linear	23109	Seed	IMG_VR_0467	Partial	ATPase MCP Penton	NA	NA	Maveriviricetes;Priklausovirales;Omnilimnoviroviridae	10.1093/nar/gkaa946 10.1186/s40168-019-0768-5	10.46936/10.25585/60000587
IMG_VR_0468	IMGVR_UViG_3300009151_002294|3300009151|Ga0114962_10001373	IMG_VR v3	Metagenome	3300009151	DTR	21071	Seed	IMG_VR_0468	Complete	ATPase MCP Penton PRO	NA	NA	Maveriviricetes;Unclassified	10.1093/nar/gkaa946 10.1186/s40168-019-0768-5	10.46936/10.25585/60000587
IMG_VR_0469	IMGVR_UViG_3300009151_002295|3300009151|Ga0114962_10001578	IMG_VR v3	Metagenome	3300009151	Linear	19542	Clustered	IMG_VR_1301	NA	NA	NA	NA	NA	10.1093/nar/gkaa946 10.1186/s40168-019-0768-5	10.46936/10.25585/60000587
IMG_VR_0470	IMGVR_UViG_3300009151_002296|3300009151|Ga0114962_10001691	IMG_VR v3	Metagenome	3300009151	DTR	18860	Seed	IMG_VR_0470	Complete	ATPase MCP Penton PRO	Group 001	NA	Maveriviricetes;Unclassified	10.1093/nar/gkaa946 10.1186/s40168-019-0768-5	10.46936/10.25585/60000587
IMG_VR_0471	IMGVR_UViG_3300009151_002297|3300009151|Ga0114962_10001763	IMG_VR v3	Metagenome	3300009151	Linear	18482	Seed	IMG_VR_0471	Partial	MCP Penton PRO	NA	NA	Maveriviricetes;Priklausovirales;Burtonviroviridae	10.1093/nar/gkaa946 10.1186/s40168-019-0768-5	10.46936/10.25585/60000587
IMG_VR_0472	IMGVR_UViG_3300009151_002298|3300009151|Ga0114962_10001784	IMG_VR v3	Metagenome	3300009151	Linear	18365	Clustered	IMG_VR_1254	NA	NA	NA	NA	NA	10.1093/nar/gkaa946 10.1186/s40168-019-0768-5	10.46936/10.25585/60000587
IMG_VR_0473	IMGVR_UViG_3300009151_002299|3300009151|Ga0114962_10002354	IMG_VR v3	Metagenome	3300009151	Linear	15812	Seed	IMG_VR_0473	Partial	MCP Penton PRO	NA	NA	Maveriviricetes;Priklausovirales;Gulliviroviridae	10.1093/nar/gkaa946 10.1186/s40168-019-0768-5	10.46936/10.25585/60000587
IMG_VR_0474	IMGVR_UViG_3300009151_002301|3300009151|Ga0114962_10002859	IMG_VR v3	Metagenome	3300009151	Linear	14185	Seed	IMG_VR_0474	Partial	ATPase MCP Penton PRO	NA	NA	Maveriviricetes;Priklausovirales;Burtonviroviridae	10.1093/nar/gkaa946 10.1186/s40168-019-0768-5	10.46936/10.25585/60000587
IMG_VR_0475	IMGVR_UViG_3300009151_002302|3300009151|Ga0114962_10003312	IMG_VR v3	Metagenome	3300009151	Linear	13082	Clustered	IMG_VR_1144	NA	NA	NA	NA	NA	10.1093/nar/gkaa946 10.1186/s40168-019-0768-5	10.46936/10.25585/60000587
IMG_VR_0476	IMGVR_UViG_3300009151_002303|3300009151|Ga0114962_10003684	IMG_VR v3	Metagenome	3300009151	Linear	12325	Seed	IMG_VR_0476	Partial	ATPase MCP Penton PRO	NA	NA	Maveriviricetes;Priklausovirales;Burtonviroviridae	10.1093/nar/gkaa946 10.1186/s40168-019-0768-5	10.46936/10.25585/60000587
IMG_VR_0477	IMGVR_UViG_3300009151_002304|3300009151|Ga0114962_10004477	IMG_VR v3	Metagenome	3300009151	Linear	11126	Clustered	IMG_VR_0841	NA	NA	NA	NA	NA	10.1093/nar/gkaa946 10.1186/s40168-019-0768-5	10.46936/10.25585/60000587
IMG_VR_0478	IMGVR_UViG_3300009151_002306|3300009151|Ga0114962_10004831	IMG_VR v3	Metagenome	3300009151	Linear	10663	Seed	IMG_VR_0478	Partial	MCP Penton PRO	NA	NA	Maveriviricetes;Priklausovirales;Burtonviroviridae	10.1093/nar/gkaa946 10.1186/s40168-019-0768-5	10.46936/10.25585/60000587
IMG_VR_0479	IMGVR_UViG_3300009151_002307|3300009151|Ga0114962_10005562	IMG_VR v3	Metagenome	3300009151	Linear	9853	Clustered	IMG_VR_0659	NA	NA	NA	NA	NA	10.1093/nar/gkaa946 10.1186/s40168-019-0768-5	10.46936/10.25585/60000587
IMG_VR_0480	IMGVR_UViG_3300009151_002308|3300009151|Ga0114962_10005912	IMG_VR v3	Metagenome	3300009151	Linear	9535	Clustered	IMG_VR_0864	NA	NA	NA	NA	NA	10.1093/nar/gkaa946 10.1186/s40168-019-0768-5	10.46936/10.25585/60000587
IMG_VR_0481	IMGVR_UViG_3300009151_002309|3300009151|Ga0114962_10006783	IMG_VR v3	Metagenome	3300009151	Linear	8787	Clustered	IMG_VR_0712	NA	NA	NA	NA	NA	10.1093/nar/gkaa946 10.1186/s40168-019-0768-5	10.46936/10.25585/60000587
IMG_VR_0482	IMGVR_UViG_3300009151_002310|3300009151|Ga0114962_10008750	IMG_VR v3	Metagenome	3300009151	Linear	7581	Clustered	IMG_VR_1275	NA	NA	NA	NA	NA	10.1093/nar/gkaa946 10.1186/s40168-019-0768-5	10.46936/10.25585/60000587
IMG_VR_0483	IMGVR_UViG_3300009151_002313|3300009151|Ga0114962_10011004	IMG_VR v3	Metagenome	3300009151	Linear	6661	Clustered	IMG_VR_0784	NA	NA	NA	NA	NA	10.1093/nar/gkaa946 10.1186/s40168-019-0768-5	10.46936/10.25585/60000587
IMG_VR_0484	IMGVR_UViG_3300009151_002314|3300009151|Ga0114962_10012236	IMG_VR v3	Metagenome	3300009151	Linear	6277	Clustered	IMG_VR_0913	NA	NA	NA	NA	NA	10.1093/nar/gkaa946 10.1186/s40168-019-0768-5	10.46936/10.25585/60000587
IMG_VR_0485	IMGVR_UViG_3300009151_002315|3300009151|Ga0114962_10012297	IMG_VR v3	Metagenome	3300009151	Linear	6260	Seed	IMG_VR_0485	Partial	ATPase MCP Penton PRO	NA	NA	Maveriviricetes;Unclassified	10.1093/nar/gkaa946 10.1186/s40168-019-0768-5	10.46936/10.25585/60000587
IMG_VR_0486	IMGVR_UViG_3300009151_002319|3300009151|Ga0114962_10012961	IMG_VR v3	Metagenome	3300009151	Linear	6078	Clustered	IMG_VR_1268	NA	NA	NA	NA	NA	10.1093/nar/gkaa946 10.1186/s40168-019-0768-5	10.46936/10.25585/60000587
IMG_VR_0487	IMGVR_UViG_3300009151_002320|3300009151|Ga0114962_10013505	IMG_VR v3	Metagenome	3300009151	Linear	5937	Clustered	IMG_VR_1366	NA	NA	NA	NA	NA	10.1093/nar/gkaa946 10.1186/s40168-019-0768-5	10.46936/10.25585/60000587
IMG_VR_0488	IMGVR_UViG_3300009151_002321|3300009151|Ga0114962_10015031	IMG_VR v3	Metagenome	3300009151	Linear	5573	Clustered	IMG_VR_0835	NA	NA	NA	NA	NA	10.1093/nar/gkaa946 10.1186/s40168-019-0768-5	10.46936/10.25585/60000587
IMG_VR_0489	IMGVR_UViG_3300009151_002322|3300009151|Ga0114962_10017812	IMG_VR v3	Metagenome	3300009151	Linear	5069	Seed	IMG_VR_0489	Partial	ATPase MCP Penton PRO	NA	NA	Maveriviricetes;Unclassified	10.1093/nar/gkaa946 10.1186/s40168-019-0768-5	10.46936/10.25585/60000587
IMG_VR_0490	IMGVR_UViG_3300009152_001075|3300009152|Ga0114980_10000646	IMG_VR v3	Metagenome	3300009152	Linear	24818	Clustered	IMG_VR_1340	NA	NA	NA	NA	NA	10.1093/nar/gkaa946 10.1111/1462-2920.14283 10.1186/s40168-019-0768-5	10.46936/10.25585/60000587
IMG_VR_0491	IMGVR_UViG_3300009152_001077|3300009152|Ga0114980_10001820	IMG_VR v3	Metagenome	3300009152	DTR	15084	Clustered	IMG_VR_0545	NA	NA	NA	NA	NA	10.1093/nar/gkaa946 10.1111/1462-2920.14283 10.1186/s40168-019-0768-5	10.46936/10.25585/60000587
IMG_VR_0492	IMGVR_UViG_3300009152_001078|3300009152|Ga0114980_10002077	IMG_VR v3	Metagenome	3300009152	Linear	14288	Seed	IMG_VR_0492	Partial	ATPase MCP Penton PRO	NA	NA	Maveriviricetes;Priklausovirales;Omnilimnoviroviridae	10.1093/nar/gkaa946 10.1111/1462-2920.14283 10.1186/s40168-019-0768-5	10.46936/10.25585/60000587
IMG_VR_0493	IMGVR_UViG_3300009152_001079|3300009152|Ga0114980_10002167	IMG_VR v3	Metagenome	3300009152	Linear	13987	Clustered	IMG_VR_0542	NA	NA	NA	NA	NA	10.1093/nar/gkaa946 10.1111/1462-2920.14283 10.1186/s40168-019-0768-5	10.46936/10.25585/60000587
IMG_VR_0494	IMGVR_UViG_3300009152_001081|3300009152|Ga0114980_10005668	IMG_VR v3	Metagenome	3300009152	Linear	8242	Clustered	IMG_VR_1136	NA	NA	NA	NA	NA	10.1093/nar/gkaa946 10.1111/1462-2920.14283 10.1186/s40168-019-0768-5	10.46936/10.25585/60000587
IMG_VR_0495	IMGVR_UViG_3300009152_001084|3300009152|Ga0114980_10007329	IMG_VR v3	Metagenome	3300009152	Linear	7226	Clustered	IMG_VR_0577	NA	NA	NA	NA	NA	10.1093/nar/gkaa946 10.1111/1462-2920.14283 10.1186/s40168-019-0768-5	10.46936/10.25585/60000587
IMG_VR_0496	IMGVR_UViG_3300009152_001085|3300009152|Ga0114980_10009715	IMG_VR v3	Metagenome	3300009152	Linear	6226	Clustered	IMG_VR_0833	NA	NA	NA	NA	NA	10.1093/nar/gkaa946 10.1111/1462-2920.14283 10.1186/s40168-019-0768-5	10.46936/10.25585/60000587
IMG_VR_0497	IMGVR_UViG_3300009154_001412|3300009154|Ga0114963_10000203|5770-38324	IMG_VR v3	Metagenome	3300009154	Integrated	32555	Clustered	IMG_VR_0457	NA	NA	NA	NA	NA	10.1093/nar/gkaa946 10.1186/s40168-019-0768-5	10.46936/10.25585/60000587
IMG_VR_0498	IMGVR_UViG_3300009154_001413|3300009154|Ga0114963_10000410	IMG_VR v3	Metagenome	3300009154	Linear	28743	Seed	IMG_VR_0498	Near-complete	ATPase MCP Penton PRO	Group 004	NA	Maveriviricetes;Unclassified	10.1093/nar/gkaa946 10.1186/s40168-019-0768-5	10.46936/10.25585/60000587
IMG_VR_0499	IMGVR_UViG_3300009154_001414|3300009154|Ga0114963_10000468	IMG_VR v3	Metagenome	3300009154	Linear	26751	Clustered	IMG_VR_1254	NA	NA	NA	NA	NA	10.1093/nar/gkaa946 10.1186/s40168-019-0768-5	10.46936/10.25585/60000587
IMG_VR_0500	IMGVR_UViG_3300009154_001415|3300009154|Ga0114963_10000572	IMG_VR v3	Metagenome	3300009154	Linear	24633	Seed	IMG_VR_0500	Partial	ATPase MCP Penton PRO	NA	NA	Maveriviricetes;Priklausovirales;Dishuiviroviridae	10.1093/nar/gkaa946 10.1186/s40168-019-0768-5	10.46936/10.25585/60000587
IMG_VR_0501	IMGVR_UViG_3300009154_001416|3300009154|Ga0114963_10000587	IMG_VR v3	Metagenome	3300009154	DTR	24328	Seed	IMG_VR_0501	Complete	ATPase MCP Penton PRO	Group 001	Aquatic virophages 1	Maveriviricetes;Priklausovirales;Omnilimnoviroviridae	10.1093/nar/gkaa946 10.1186/s40168-019-0768-5	10.46936/10.25585/60000587
IMG_VR_0502	IMGVR_UViG_3300009154_001417|3300009154|Ga0114963_10000678	IMG_VR v3	Metagenome	3300009154	Linear	22971	Seed	IMG_VR_0502	Partial	ATPase MCP Penton PRO	NA	NA	Maveriviricetes;Unclassified	10.1093/nar/gkaa946 10.1186/s40168-019-0768-5	10.46936/10.25585/60000587
IMG_VR_0503	IMGVR_UViG_3300009154_001418|3300009154|Ga0114963_10000931	IMG_VR v3	Metagenome	3300009154	Linear	20078	Seed	IMG_VR_0503	Partial	ATPase MCP Penton PRO	NA	NA	Maveriviricetes;Priklausovirales;Omnilimnoviroviridae	10.1093/nar/gkaa946 10.1186/s40168-019-0768-5	10.46936/10.25585/60000587
IMG_VR_0504	IMGVR_UViG_3300009154_001419|3300009154|Ga0114963_10001463	IMG_VR v3	Metagenome	3300009154	Linear	16315	Seed	IMG_VR_0504	Partial	ATPase MCP Penton	NA	NA	Maveriviricetes;Priklausovirales;Omnilimnoviroviridae	10.1093/nar/gkaa946 10.1186/s40168-019-0768-5	10.46936/10.25585/60000587
IMG_VR_0505	IMGVR_UViG_3300009154_001421|3300009154|Ga0114963_10002531	IMG_VR v3	Metagenome	3300009154	Linear	12501	Seed	IMG_VR_0505	Partial	ATPase MCP Penton PRO	NA	NA	Maveriviricetes;Priklausovirales;Dishuiviroviridae	10.1093/nar/gkaa946 10.1186/s40168-019-0768-5	10.46936/10.25585/60000587
IMG_VR_0506	IMGVR_UViG_3300009154_001424|3300009154|Ga0114963_10003513	IMG_VR v3	Metagenome	3300009154	Linear	10707	Seed	IMG_VR_0506	Partial	MCP Penton PRO	NA	NA	Maveriviricetes;Priklausovirales;Burtonviroviridae	10.1093/nar/gkaa946 10.1186/s40168-019-0768-5	10.46936/10.25585/60000587
IMG_VR_0507	IMGVR_UViG_3300009154_001425|3300009154|Ga0114963_10003697	IMG_VR v3	Metagenome	3300009154	Linear	10486	Clustered	IMG_VR_0871	NA	NA	NA	NA	NA	10.1093/nar/gkaa946 10.1186/s40168-019-0768-5	10.46936/10.25585/60000587
IMG_VR_0508	IMGVR_UViG_3300009154_001426|3300009154|Ga0114963_10004079	IMG_VR v3	Metagenome	3300009154	Linear	10003	Clustered	IMG_VR_0461	NA	NA	NA	NA	NA	10.1093/nar/gkaa946 10.1186/s40168-019-0768-5	10.46936/10.25585/60000587
IMG_VR_0509	IMGVR_UViG_3300009154_001427|3300009154|Ga0114963_10004385	IMG_VR v3	Metagenome	3300009154	Linear	9686	Seed	IMG_VR_0509	Partial	MCP Penton PRO	NA	NA	Maveriviricetes;Priklausovirales;Burtonviroviridae	10.1093/nar/gkaa946 10.1186/s40168-019-0768-5	10.46936/10.25585/60000587
IMG_VR_0510	IMGVR_UViG_3300009154_001428|3300009154|Ga0114963_10004519	IMG_VR v3	Metagenome	3300009154	Linear	9563	Seed	IMG_VR_0510	Partial	ATPase MCP Penton PRO	NA	NA	Maveriviricetes;Priklausovirales;Omnilimnoviroviridae	10.1093/nar/gkaa946 10.1186/s40168-019-0768-5	10.46936/10.25585/60000587
IMG_VR_0511	IMGVR_UViG_3300009154_001429|3300009154|Ga0114963_10005108	IMG_VR v3	Metagenome	3300009154	Linear	9024	Clustered	IMG_VR_0812	NA	NA	NA	NA	NA	10.1093/nar/gkaa946 10.1186/s40168-019-0768-5	10.46936/10.25585/60000587
IMG_VR_0512	IMGVR_UViG_3300009154_001432|3300009154|Ga0114963_10007327	IMG_VR v3	Metagenome	3300009154	Linear	7510	Clustered	IMG_VR_1268	NA	NA	NA	NA	NA	10.1093/nar/gkaa946 10.1186/s40168-019-0768-5	10.46936/10.25585/60000587
IMG_VR_0513	IMGVR_UViG_3300009154_001435|3300009154|Ga0114963_10009468	IMG_VR v3	Metagenome	3300009154	Linear	6629	Clustered	IMG_VR_1255	NA	NA	NA	NA	NA	10.1093/nar/gkaa946 10.1186/s40168-019-0768-5	10.46936/10.25585/60000587
IMG_VR_0514	IMGVR_UViG_3300009154_001436|3300009154|Ga0114963_10010528	IMG_VR v3	Metagenome	3300009154	Linear	6281	Seed	IMG_VR_0514	Partial	MCP Penton PRO	NA	NA	Maveriviricetes;Priklausovirales;Burtonviroviridae	10.1093/nar/gkaa946 10.1186/s40168-019-0768-5	10.46936/10.25585/60000587
IMG_VR_0515	IMGVR_UViG_3300009154_001437|3300009154|Ga0114963_10011446	IMG_VR v3	Metagenome	3300009154	Linear	6014	Seed	IMG_VR_0515	Partial	MCP Penton PRO	NA	NA	Maveriviricetes;Unclassified	10.1093/nar/gkaa946 10.1186/s40168-019-0768-5	10.46936/10.25585/60000587
IMG_VR_0516	IMGVR_UViG_3300009154_001440|3300009154|Ga0114963_10014347	IMG_VR v3	Metagenome	3300009154	Linear	5338	Clustered	IMG_VR_1369	NA	NA	NA	NA	NA	10.1093/nar/gkaa946 10.1186/s40168-019-0768-5	10.46936/10.25585/60000587
IMG_VR_0517	IMGVR_UViG_3300009155_001627|3300009155|Ga0114968_10000427	IMG_VR v3	Metagenome	3300009155	Linear	31308	Clustered	IMG_VR_1283	NA	NA	NA	NA	NA	10.1093/nar/gkaa946 10.1186/s40168-019-0768-5	10.46936/10.25585/60000587
IMG_VR_0518	IMGVR_UViG_3300009155_001628|3300009155|Ga0114968_10000531	IMG_VR v3	Metagenome	3300009155	Linear	28300	Clustered	IMG_VR_0584	NA	NA	NA	NA	NA	10.1093/nar/gkaa946 10.1186/s40168-019-0768-5	10.46936/10.25585/60000587
IMG_VR_0519	IMGVR_UViG_3300009155_001629|3300009155|Ga0114968_10000753	IMG_VR v3	Metagenome	3300009155	Linear	24289	Seed	IMG_VR_0519	Partial	ATPase MCP Penton PRO	NA	NA	Maveriviricetes;Priklausovirales;Gulliviroviridae	10.1093/nar/gkaa946 10.1186/s40168-019-0768-5	10.46936/10.25585/60000587
IMG_VR_0520	IMGVR_UViG_3300009155_001630|3300009155|Ga0114968_10001484	IMG_VR v3	Metagenome	3300009155	Linear	17976	Seed	IMG_VR_0520	Partial	MCP Penton PRO	NA	NA	Maveriviricetes;Priklausovirales;Burtonviroviridae	10.1093/nar/gkaa946 10.1186/s40168-019-0768-5	10.46936/10.25585/60000587
IMG_VR_0521	IMGVR_UViG_3300009155_001631|3300009155|Ga0114968_10005667	IMG_VR v3	Metagenome	3300009155	Linear	9247	Seed	IMG_VR_0521	Partial	ATPase MCP Penton	NA	NA	Maveriviricetes;Priklausovirales;Omnilimnoviroviridae	10.1093/nar/gkaa946 10.1186/s40168-019-0768-5	10.46936/10.25585/60000587
IMG_VR_0522	IMGVR_UViG_3300009155_001632|3300009155|Ga0114968_10014541	IMG_VR v3	Metagenome	3300009155	Linear	5552	Seed	IMG_VR_0522	Partial	MCP Penton PRO	NA	NA	Maveriviricetes;Unclassified	10.1093/nar/gkaa946 10.1186/s40168-019-0768-5	10.46936/10.25585/60000587
IMG_VR_0523	IMGVR_UViG_3300009157_000130|3300009157|Ga0105092_10001347	IMG_VR v3	Metagenome	3300009157	Linear	13142	Seed	IMG_VR_0523	Partial	ATPase MCP Penton PRO	NA	NA	Maveriviricetes;Mividavirales;Sputniviroviridae	10.1093/nar/gkaa946 10.1186/s40168-019-0768-5	10.46936/10.25585/60000718
IMG_VR_0524	IMGVR_UViG_3300009158_001095|3300009158|Ga0114977_10000577	IMG_VR v3	Metagenome	3300009158	Linear	24287	Clustered	IMG_VR_0519	NA	NA	NA	NA	NA	10.1093/nar/gkaa946 10.1186/s40168-019-0768-5	10.46936/10.25585/60000587
IMG_VR_0525	IMGVR_UViG_3300009158_001096|3300009158|Ga0114977_10000780	IMG_VR v3	Metagenome	3300009158	Linear	21114	Seed	IMG_VR_0525	Partial	ATPase MCP Penton PRO	NA	NA	Maveriviricetes;Priklausovirales;Burtonviroviridae	10.1093/nar/gkaa946 10.1186/s40168-019-0768-5	10.46936/10.25585/60000587
IMG_VR_0526	IMGVR_UViG_3300009158_001097|3300009158|Ga0114977_10000945	IMG_VR v3	Metagenome	3300009158	Linear	19258	Clustered	IMG_VR_0600	NA	NA	NA	NA	NA	10.1093/nar/gkaa946 10.1186/s40168-019-0768-5	10.46936/10.25585/60000587
IMG_VR_0527	IMGVR_UViG_3300009158_001098|3300009158|Ga0114977_10001471	IMG_VR v3	Metagenome	3300009158	Linear	15482	Seed	IMG_VR_0527	Partial	MCP Penton PRO	NA	NA	Maveriviricetes;Priklausovirales;Burtonviroviridae	10.1093/nar/gkaa946 10.1186/s40168-019-0768-5	10.46936/10.25585/60000587
IMG_VR_0528	IMGVR_UViG_3300009158_001099|3300009158|Ga0114977_10001522	IMG_VR v3	Metagenome	3300009158	Linear	15236	Clustered	IMG_VR_0611	NA	NA	NA	NA	NA	10.1093/nar/gkaa946 10.1186/s40168-019-0768-5	10.46936/10.25585/60000587
IMG_VR_0529	IMGVR_UViG_3300009158_001100|3300009158|Ga0114977_10001724	IMG_VR v3	Metagenome	3300009158	Linear	14396	Seed	IMG_VR_0529	Partial	ATPase MCP Penton PRO	NA	NA	Maveriviricetes;Priklausovirales;Burtonviroviridae	10.1093/nar/gkaa946 10.1186/s40168-019-0768-5	10.46936/10.25585/60000587
IMG_VR_0530	IMGVR_UViG_3300009158_001103|3300009158|Ga0114977_10004058	IMG_VR v3	Metagenome	3300009158	Linear	9356	Clustered	IMG_VR_0616	NA	NA	NA	NA	NA	10.1093/nar/gkaa946 10.1186/s40168-019-0768-5	10.46936/10.25585/60000587
IMG_VR_0531	IMGVR_UViG_3300009158_001106|3300009158|Ga0114977_10005852	IMG_VR v3	Metagenome	3300009158	Linear	7803	Clustered	IMG_VR_0609	NA	NA	NA	NA	NA	10.1093/nar/gkaa946 10.1186/s40168-019-0768-5	10.46936/10.25585/60000587
IMG_VR_0532	IMGVR_UViG_3300009159_002149|3300009159|Ga0114978_10000567	IMG_VR v3	Metagenome	3300009159	Linear	31603	Clustered	IMG_VR_0560	NA	NA	NA	NA	NA	10.1093/nar/gkaa946 10.1111/1462-2920.14283 10.1186/s40168-019-0768-5	10.46936/10.25585/60000587
IMG_VR_0533	IMGVR_UViG_3300009159_002150|3300009159|Ga0114978_10000595	IMG_VR v3	Metagenome	3300009159	Linear	30948	Clustered	IMG_VR_1304	NA	NA	NA	NA	NA	10.1093/nar/gkaa946 10.1111/1462-2920.14283 10.1186/s40168-019-0768-5	10.46936/10.25585/60000587
IMG_VR_0534	IMGVR_UViG_3300009159_002151|3300009159|Ga0114978_10000739	IMG_VR v3	Metagenome	3300009159	Linear	27446	Seed	IMG_VR_0534	Near-complete	ATPase MCP Penton PRO	Group 003	Aquatic virophages 2	Maveriviricetes;Priklausovirales;Burtonviroviridae	10.1093/nar/gkaa946 10.1111/1462-2920.14283 10.1186/s40168-019-0768-5	10.46936/10.25585/60000587
IMG_VR_0535	IMGVR_UViG_3300009159_002152|3300009159|Ga0114978_10001109	IMG_VR v3	Metagenome	3300009159	Linear	22567	Clustered	IMG_VR_0605	NA	NA	NA	NA	NA	10.1093/nar/gkaa946 10.1111/1462-2920.14283 10.1186/s40168-019-0768-5	10.46936/10.25585/60000587
IMG_VR_0536	IMGVR_UViG_3300009159_002153|3300009159|Ga0114978_10001456	IMG_VR v3	Metagenome	3300009159	Linear	19887	Clustered	IMG_VR_0611	NA	NA	NA	NA	NA	10.1093/nar/gkaa946 10.1111/1462-2920.14283 10.1186/s40168-019-0768-5	10.46936/10.25585/60000587
IMG_VR_0537	IMGVR_UViG_3300009159_002154|3300009159|Ga0114978_10001558	IMG_VR v3	Metagenome	3300009159	Linear	19234	Clustered	IMG_VR_0519	NA	NA	NA	NA	NA	10.1093/nar/gkaa946 10.1111/1462-2920.14283 10.1186/s40168-019-0768-5	10.46936/10.25585/60000587
IMG_VR_0538	IMGVR_UViG_3300009159_002155|3300009159|Ga0114978_10003482	IMG_VR v3	Metagenome	3300009159	Linear	12862	Seed	IMG_VR_0538	Partial	ATPase MCP Penton	NA	NA	Maveriviricetes;Priklausovirales;Omnilimnoviroviridae	10.1093/nar/gkaa946 10.1111/1462-2920.14283 10.1186/s40168-019-0768-5	10.46936/10.25585/60000587
IMG_VR_0539	IMGVR_UViG_3300009159_002158|3300009159|Ga0114978_10008063	IMG_VR v3	Metagenome	3300009159	Linear	8280	Clustered	IMG_VR_0911	NA	NA	NA	NA	NA	10.1093/nar/gkaa946 10.1111/1462-2920.14283 10.1186/s40168-019-0768-5	10.46936/10.25585/60000587
IMG_VR_0540	IMGVR_UViG_3300009159_002159|3300009159|Ga0114978_10011570	IMG_VR v3	Metagenome	3300009159	Linear	6773	Clustered	IMG_VR_0527	NA	NA	NA	NA	NA	10.1093/nar/gkaa946 10.1111/1462-2920.14283 10.1186/s40168-019-0768-5	10.46936/10.25585/60000587
IMG_VR_0541	IMGVR_UViG_3300009159_002161|3300009159|Ga0114978_10017708	IMG_VR v3	Metagenome	3300009159	Linear	5317	Seed	IMG_VR_0541	Partial	MCP Penton PRO	NA	NA	Maveriviricetes;Priklausovirales;Burtonviroviridae	10.1093/nar/gkaa946 10.1111/1462-2920.14283 10.1186/s40168-019-0768-5	10.46936/10.25585/60000587
IMG_VR_0542	IMGVR_UViG_3300009160_000901|3300009160|Ga0114981_10000712	IMG_VR v3	Metagenome	3300009160	Linear	21711	Seed	IMG_VR_0542	Partial	ATPase MCP Penton PRO	NA	NA	Maveriviricetes;Priklausovirales;Burtonviroviridae	10.1093/nar/gkaa946 10.1111/1462-2920.14283 10.1186/s40168-019-0768-5	10.46936/10.25585/60000587
IMG_VR_0543	IMGVR_UViG_3300009160_000902|3300009160|Ga0114981_10000978	IMG_VR v3	Metagenome	3300009160	Linear	18875	Seed	IMG_VR_0543	Partial	MCP Penton PRO	NA	NA	Maveriviricetes;Priklausovirales;Burtonviroviridae	10.1093/nar/gkaa946 10.1111/1462-2920.14283 10.1186/s40168-019-0768-5	10.46936/10.25585/60000587
IMG_VR_0544	IMGVR_UViG_3300009160_000903|3300009160|Ga0114981_10001071	IMG_VR v3	Metagenome	3300009160	Linear	17974	Seed	IMG_VR_0544	Partial	MCP Penton PRO	NA	NA	Maveriviricetes;Priklausovirales;Omnilimnoviroviridae	10.1093/nar/gkaa946 10.1111/1462-2920.14283 10.1186/s40168-019-0768-5	10.46936/10.25585/60000587
IMG_VR_0545	IMGVR_UViG_3300009160_000905|3300009160|Ga0114981_10001519	IMG_VR v3	Metagenome	3300009160	DTR	15111	Seed	IMG_VR_0545	Complete	ATPase MCP Penton PRO	Group 001	NA	Maveriviricetes;Unclassified	10.1093/nar/gkaa946 10.1111/1462-2920.14283 10.1186/s40168-019-0768-5	10.46936/10.25585/60000587
IMG_VR_0546	IMGVR_UViG_3300009161_001275|3300009161|Ga0114966_10001014	IMG_VR v3	Metagenome	3300009161	Linear	26297	Seed	IMG_VR_0546	Near-complete	ATPase MCP Penton PRO	Group 004	SW01 virophages	Maveriviricetes;Priklausovirales;Dishuiviroviridae	10.1093/nar/gkaa946 10.1186/s40168-019-0768-5	10.46936/10.25585/60000587
IMG_VR_0547	IMGVR_UViG_3300009161_001277|3300009161|Ga0114966_10005339	IMG_VR v3	Metagenome	3300009161	Linear	10895	Seed	IMG_VR_0547	Partial	ATPase MCP Penton	NA	NA	Maveriviricetes;Priklausovirales;Omnilimnoviroviridae	10.1093/nar/gkaa946 10.1186/s40168-019-0768-5	10.46936/10.25585/60000587
IMG_VR_0548	IMGVR_UViG_3300009163_001065|3300009163|Ga0114970_10000439	IMG_VR v3	Metagenome	3300009163	DTR	30914	Seed	IMG_VR_0548	Complete	ATPase MCP Penton PRO	Group 004	SW01 virophages	Maveriviricetes;Priklausovirales;Dishuiviroviridae	10.1093/nar/gkaa946 10.1186/s40168-019-0768-5	10.46936/10.25585/60000587
IMG_VR_0549	IMGVR_UViG_3300009163_001066|3300009163|Ga0114970_10001276	IMG_VR v3	Metagenome	3300009163	Linear	18812	Seed	IMG_VR_0549	Partial	ATPase MCP Penton	NA	NA	Maveriviricetes;Priklausovirales;Dishuiviroviridae	10.1093/nar/gkaa946 10.1186/s40168-019-0768-5	10.46936/10.25585/60000587
IMG_VR_0550	IMGVR_UViG_3300009163_001067|3300009163|Ga0114970_10001434	IMG_VR v3	Metagenome	3300009163	Linear	17820	Clustered	IMG_VR_0584	NA	NA	NA	NA	NA	10.1093/nar/gkaa946 10.1186/s40168-019-0768-5	10.46936/10.25585/60000587
IMG_VR_0551	IMGVR_UViG_3300009163_001068|3300009163|Ga0114970_10002242	IMG_VR v3	Metagenome	3300009163	Linear	14515	Seed	IMG_VR_0551	Partial	ATPase MCP Penton PRO	NA	NA	Maveriviricetes;Unclassified	10.1093/nar/gkaa946 10.1186/s40168-019-0768-5	10.46936/10.25585/60000587
IMG_VR_0552	IMGVR_UViG_3300009163_001070|3300009163|Ga0114970_10003848	IMG_VR v3	Metagenome	3300009163	Linear	10956	Clustered	IMG_VR_0445	NA	NA	NA	NA	NA	10.1093/nar/gkaa946 10.1186/s40168-019-0768-5	10.46936/10.25585/60000587
IMG_VR_0553	IMGVR_UViG_3300009163_001071|3300009163|Ga0114970_10005069	IMG_VR v3	Metagenome	3300009163	Linear	9548	Seed	IMG_VR_0553	Partial	ATPase MCP Penton PRO	NA	NA	Maveriviricetes;Priklausovirales;Gulliviroviridae	10.1093/nar/gkaa946 10.1186/s40168-019-0768-5	10.46936/10.25585/60000587
IMG_VR_0554	IMGVR_UViG_3300009163_001072|3300009163|Ga0114970_10007548	IMG_VR v3	Metagenome	3300009163	Linear	7752	Seed	IMG_VR_0554	Partial	ATPase MCP Penton PRO	NA	NA	Maveriviricetes;Priklausovirales;Dishuiviroviridae	10.1093/nar/gkaa946 10.1186/s40168-019-0768-5	10.46936/10.25585/60000587
IMG_VR_0555	IMGVR_UViG_3300009163_001073|3300009163|Ga0114970_10008293	IMG_VR v3	Metagenome	3300009163	Linear	7363	Seed	IMG_VR_0555	Partial	MCP Penton PRO	NA	NA	Maveriviricetes;Priklausovirales;Burtonviroviridae	10.1093/nar/gkaa946 10.1186/s40168-019-0768-5	10.46936/10.25585/60000587
IMG_VR_0556	IMGVR_UViG_3300009163_001074|3300009163|Ga0114970_10009626	IMG_VR v3	Metagenome	3300009163	Linear	6806	Clustered	IMG_VR_0798	NA	NA	NA	NA	NA	10.1093/nar/gkaa946 10.1186/s40168-019-0768-5	10.46936/10.25585/60000587
IMG_VR_0557	IMGVR_UViG_3300009164_002009|3300009164|Ga0114975_10000387	IMG_VR v3	Metagenome	3300009164	Linear	33079	Clustered	IMG_VR_1331	NA	NA	NA	NA	NA	10.1093/nar/gkaa946 10.1186/s40168-019-0768-5	10.46936/10.25585/60000587
IMG_VR_0558	IMGVR_UViG_3300009164_002010|3300009164|Ga0114975_10000394	IMG_VR v3	Metagenome	3300009164	Linear	32910	Clustered	IMG_VR_0764	NA	NA	NA	NA	NA	10.1093/nar/gkaa946 10.1186/s40168-019-0768-5	10.46936/10.25585/60000587
IMG_VR_0559	IMGVR_UViG_3300009164_002011|3300009164|Ga0114975_10000409	IMG_VR v3	Metagenome	3300009164	DTR	32221	Clustered	IMG_VR_0600	NA	NA	NA	NA	NA	10.1093/nar/gkaa946 10.1186/s40168-019-0768-5	10.46936/10.25585/60000587
IMG_VR_0560	IMGVR_UViG_3300009164_002012|3300009164|Ga0114975_10000427	IMG_VR v3	Metagenome	3300009164	Linear	31709	Seed	IMG_VR_0560	Near-complete	ATPase MCP Penton PRO	Group 005	Large virophages	Maveriviricetes;Priklausovirales;Gulliviroviridae	10.1093/nar/gkaa946 10.1186/s40168-019-0768-5	10.46936/10.25585/60000587
IMG_VR_0561	IMGVR_UViG_3300009164_002013|3300009164|Ga0114975_10000495	IMG_VR v3	Metagenome	3300009164	Linear	29720	Clustered	IMG_VR_0769	NA	NA	NA	NA	NA	10.1093/nar/gkaa946 10.1186/s40168-019-0768-5	10.46936/10.25585/60000587
IMG_VR_0562	IMGVR_UViG_3300009164_002014|3300009164|Ga0114975_10000616	IMG_VR v3	Metagenome	3300009164	Linear	26840	Seed	IMG_VR_0562	Near-complete	ATPase MCP Penton PRO	Group 005	Large virophages	Maveriviricetes;Priklausovirales;Gulliviroviridae	10.1093/nar/gkaa946 10.1186/s40168-019-0768-5	10.46936/10.25585/60000587
IMG_VR_0563	IMGVR_UViG_3300009164_002015|3300009164|Ga0114975_10000879	IMG_VR v3	Metagenome	3300009164	Linear	21953	Seed	IMG_VR_0563	Partial	MCP Penton PRO	NA	NA	Maveriviricetes;Priklausovirales;Dishuiviroviridae	10.1093/nar/gkaa946 10.1186/s40168-019-0768-5	10.46936/10.25585/60000587
IMG_VR_0564	IMGVR_UViG_3300009164_002016|3300009164|Ga0114975_10001038	IMG_VR v3	Metagenome	3300009164	Linear	20173	Seed	IMG_VR_0564	Partial	ATPase MCP Penton PRO	NA	NA	Maveriviricetes;Priklausovirales;Burtonviroviridae	10.1093/nar/gkaa946 10.1186/s40168-019-0768-5	10.46936/10.25585/60000587
IMG_VR_0565	IMGVR_UViG_3300009164_002017|3300009164|Ga0114975_10001152	IMG_VR v3	Metagenome	3300009164	Linear	19159	Seed	IMG_VR_0565	Partial	ATPase MCP Penton PRO	NA	NA	Maveriviricetes;Priklausovirales;Burtonviroviridae	10.1093/nar/gkaa946 10.1186/s40168-019-0768-5	10.46936/10.25585/60000587
IMG_VR_0566	IMGVR_UViG_3300009164_002018|3300009164|Ga0114975_10001466	IMG_VR v3	Metagenome	3300009164	Linear	16799	Seed	IMG_VR_0566	Partial	ATPase MCP Penton PRO	NA	NA	Maveriviricetes;Priklausovirales;Burtonviroviridae	10.1093/nar/gkaa946 10.1186/s40168-019-0768-5	10.46936/10.25585/60000587
IMG_VR_0567	IMGVR_UViG_3300009164_002019|3300009164|Ga0114975_10001700	IMG_VR v3	Metagenome	3300009164	Linear	15432	Clustered	IMG_VR_1289	NA	NA	NA	NA	NA	10.1093/nar/gkaa946 10.1186/s40168-019-0768-5	10.46936/10.25585/60000587
IMG_VR_0568	IMGVR_UViG_3300009164_002020|3300009164|Ga0114975_10001773	IMG_VR v3	Metagenome	3300009164	Linear	15040	Clustered	IMG_VR_0545	NA	NA	NA	NA	NA	10.1093/nar/gkaa946 10.1186/s40168-019-0768-5	10.46936/10.25585/60000587
IMG_VR_0569	IMGVR_UViG_3300009164_002022|3300009164|Ga0114975_10002521	IMG_VR v3	Metagenome	3300009164	Linear	12522	Clustered	IMG_VR_0615	NA	NA	NA	NA	NA	10.1093/nar/gkaa946 10.1186/s40168-019-0768-5	10.46936/10.25585/60000587
IMG_VR_0570	IMGVR_UViG_3300009164_002023|3300009164|Ga0114975_10002759	IMG_VR v3	Metagenome	3300009164	Linear	11950	Seed	IMG_VR_0570	Partial	ATPase MCP Penton PRO	NA	NA	Maveriviricetes;Priklausovirales;Burtonviroviridae	10.1093/nar/gkaa946 10.1186/s40168-019-0768-5	10.46936/10.25585/60000587
IMG_VR_0571	IMGVR_UViG_3300009164_002024|3300009164|Ga0114975_10004142	IMG_VR v3	Metagenome	3300009164	Linear	9539	Clustered	IMG_VR_0811	NA	NA	NA	NA	NA	10.1093/nar/gkaa946 10.1186/s40168-019-0768-5	10.46936/10.25585/60000587
IMG_VR_0572	IMGVR_UViG_3300009164_002026|3300009164|Ga0114975_10007917	IMG_VR v3	Metagenome	3300009164	Linear	6732	Clustered	IMG_VR_0519	NA	NA	NA	NA	NA	10.1093/nar/gkaa946 10.1186/s40168-019-0768-5	10.46936/10.25585/60000587
IMG_VR_0573	IMGVR_UViG_3300009164_002027|3300009164|Ga0114975_10009724	IMG_VR v3	Metagenome	3300009164	Linear	6017	Seed	IMG_VR_0573	Partial	ATPase MCP Penton	NA	NA	Maveriviricetes;Priklausovirales;Omnilimnoviroviridae	10.1093/nar/gkaa946 10.1186/s40168-019-0768-5	10.46936/10.25585/60000587
IMG_VR_0574	IMGVR_UViG_3300009169_000252|3300009169|Ga0105097_10001423	IMG_VR v3	Metagenome	3300009169	Linear	11433	Seed	IMG_VR_0574	Partial	NA	NA	NA	NA	10.1093/nar/gkaa946 10.1186/s40168-018-0522-4	10.46936/10.25585/60000718
IMG_VR_0576	IMGVR_UViG_3300009180_001303|3300009180|Ga0114979_10000613	IMG_VR v3	Metagenome	3300009180	Linear	23415	Clustered	PE_249	NA	NA	NA	NA	NA	10.1093/nar/gkaa946 10.1186/s40168-019-0768-5	10.46936/10.25585/60000587
IMG_VR_0577	IMGVR_UViG_3300009180_001304|3300009180|Ga0114979_10000767	IMG_VR v3	Metagenome	3300009180	DTR	21161	Seed	IMG_VR_0577	Complete	ATPase MCP Penton PRO	Group 004	SW01 virophages	Maveriviricetes;Priklausovirales;Dishuiviroviridae	10.1093/nar/gkaa946 10.1186/s40168-019-0768-5	10.46936/10.25585/60000587
IMG_VR_0578	IMGVR_UViG_3300009180_001305|3300009180|Ga0114979_10000960	IMG_VR v3	Metagenome	3300009180	Linear	19135	Clustered	IMG_VR_0564	NA	NA	NA	NA	NA	10.1093/nar/gkaa946 10.1186/s40168-019-0768-5	10.46936/10.25585/60000587
IMG_VR_0579	IMGVR_UViG_3300009180_001306|3300009180|Ga0114979_10001118	IMG_VR v3	Metagenome	3300009180	Linear	17875	Clustered	IMG_VR_1340	NA	NA	NA	NA	NA	10.1093/nar/gkaa946 10.1186/s40168-019-0768-5	10.46936/10.25585/60000587
IMG_VR_0580	IMGVR_UViG_3300009180_001307|3300009180|Ga0114979_10001466	IMG_VR v3	Metagenome	3300009180	Linear	15947	Clustered	IMG_VR_0834	NA	NA	NA	NA	NA	10.1093/nar/gkaa946 10.1186/s40168-019-0768-5	10.46936/10.25585/60000587
IMG_VR_0581	IMGVR_UViG_3300009180_001308|3300009180|Ga0114979_10001471	IMG_VR v3	Metagenome	3300009180	Linear	15933	Seed	IMG_VR_0581	Partial	MCP Penton PRO	NA	NA	Maveriviricetes;Priklausovirales;Omnilimnoviroviridae	10.1093/nar/gkaa946 10.1186/s40168-019-0768-5	10.46936/10.25585/60000587
IMG_VR_0582	IMGVR_UViG_3300009180_001309|3300009180|Ga0114979_10001868	IMG_VR v3	Metagenome	3300009180	Linear	14210	Clustered	IMG_VR_1292	NA	NA	NA	NA	NA	10.1093/nar/gkaa946 10.1186/s40168-019-0768-5	10.46936/10.25585/60000587
IMG_VR_0583	IMGVR_UViG_3300009180_001312|3300009180|Ga0114979_10011154	IMG_VR v3	Metagenome	3300009180	Linear	5816	Clustered	IMG_VR_0843	NA	NA	NA	NA	NA	10.1093/nar/gkaa946 10.1186/s40168-019-0768-5	10.46936/10.25585/60000587
IMG_VR_0584	IMGVR_UViG_3300009181_001653|3300009181|Ga0114969_10000735	IMG_VR v3	Metagenome	3300009181	ITR	28443	Seed	IMG_VR_0584	Complete	ATPase MCP Penton PRO	Group 003	Aquatic virophages 2	Maveriviricetes;Priklausovirales;Burtonviroviridae	10.1093/nar/gkaa946 10.1186/s40168-019-0768-5	10.46936/10.25585/60000587
IMG_VR_0585	IMGVR_UViG_3300009181_001654|3300009181|Ga0114969_10000987	IMG_VR v3	Metagenome	3300009181	Linear	24183	Seed	IMG_VR_0585	Partial	ATPase MCP Penton PRO	NA	NA	Maveriviricetes;Unclassified	10.1093/nar/gkaa946 10.1186/s40168-019-0768-5	10.46936/10.25585/60000587
IMG_VR_0586	IMGVR_UViG_3300009181_001655|3300009181|Ga0114969_10001026	IMG_VR v3	Metagenome	3300009181	Linear	23698	Clustered	IMG_VR_0799	NA	NA	NA	NA	NA	10.1093/nar/gkaa946 10.1186/s40168-019-0768-5	10.46936/10.25585/60000587
IMG_VR_0587	IMGVR_UViG_3300009181_001656|3300009181|Ga0114969_10001288	IMG_VR v3	Metagenome	3300009181	DTR	21314	Seed	IMG_VR_0587	Complete	ATPase MCP Penton PRO	Group 001	Aquatic virophages 1	Maveriviricetes;Priklausovirales;Omnilimnoviroviridae	10.1093/nar/gkaa946 10.1186/s40168-019-0768-5	10.46936/10.25585/60000587
IMG_VR_0588	IMGVR_UViG_3300009181_001657|3300009181|Ga0114969_10001342	IMG_VR v3	Metagenome	3300009181	Linear	20866	Clustered	IMG_VR_0727	NA	NA	NA	NA	NA	10.1093/nar/gkaa946 10.1186/s40168-019-0768-5	10.46936/10.25585/60000587
IMG_VR_0589	IMGVR_UViG_3300009181_001658|3300009181|Ga0114969_10003145	IMG_VR v3	Metagenome	3300009181	Linear	13357	Clustered	IMG_VR_1283	NA	NA	NA	NA	NA	10.1093/nar/gkaa946 10.1186/s40168-019-0768-5	10.46936/10.25585/60000587
IMG_VR_0590	IMGVR_UViG_3300009181_001659|3300009181|Ga0114969_10003265	IMG_VR v3	Metagenome	3300009181	Linear	13118	Clustered	IMG_VR_0445	NA	NA	NA	NA	NA	10.1093/nar/gkaa946 10.1186/s40168-019-0768-5	10.46936/10.25585/60000587
IMG_VR_0591	IMGVR_UViG_3300009182_001500|3300009182|Ga0114959_10000941	IMG_VR v3	Metagenome	3300009182	Linear	26829	Clustered	IMG_VR_1254	NA	NA	NA	NA	NA	10.1093/nar/gkaa946 10.1186/s40168-019-0768-5	10.46936/10.25585/60000587
IMG_VR_0592	IMGVR_UViG_3300009182_001501|3300009182|Ga0114959_10001102	IMG_VR v3	Metagenome	3300009182	DTR	24280	Seed	IMG_VR_0592	Complete	ATPase MCP Penton PRO	Group 001	Aquatic virophages 1	Maveriviricetes;Priklausovirales;Omnilimnoviroviridae	10.1093/nar/gkaa946 10.1186/s40168-019-0768-5	10.46936/10.25585/60000587
IMG_VR_0593	IMGVR_UViG_3300009182_001502|3300009182|Ga0114959_10002038	IMG_VR v3	Metagenome	3300009182	Linear	17009	Seed	IMG_VR_0593	Partial	ATPase MCP Penton PRO	NA	NA	Maveriviricetes;Priklausovirales;Omnilimnoviroviridae	10.1093/nar/gkaa946 10.1186/s40168-019-0768-5	10.46936/10.25585/60000587
IMG_VR_0594	IMGVR_UViG_3300009182_001503|3300009182|Ga0114959_10002069	IMG_VR v3	Metagenome	3300009182	Linear	16828	Seed	IMG_VR_0594	Partial	MCP Penton PRO	NA	NA	Maveriviricetes;Priklausovirales;Burtonviroviridae	10.1093/nar/gkaa946 10.1186/s40168-019-0768-5	10.46936/10.25585/60000587
IMG_VR_0595	IMGVR_UViG_3300009182_001504|3300009182|Ga0114959_10002192	IMG_VR v3	Metagenome	3300009182	Linear	16382	Seed	IMG_VR_0595	Partial	MCP Penton PRO	NA	NA	Maveriviricetes;Priklausovirales;Omnilimnoviroviridae	10.1093/nar/gkaa946 10.1186/s40168-019-0768-5	10.46936/10.25585/60000587
IMG_VR_0596	IMGVR_UViG_3300009182_001505|3300009182|Ga0114959_10004907	IMG_VR v3	Metagenome	3300009182	Linear	10110	Clustered	IMG_VR_1369	NA	NA	NA	NA	NA	10.1093/nar/gkaa946 10.1186/s40168-019-0768-5	10.46936/10.25585/60000587
IMG_VR_0597	IMGVR_UViG_3300009182_001506|3300009182|Ga0114959_10005565	IMG_VR v3	Metagenome	3300009182	Linear	9362	Seed	IMG_VR_0597	Partial	MCP Penton PRO	NA	NA	Maveriviricetes;Priklausovirales;Burtonviroviridae	10.1093/nar/gkaa946 10.1186/s40168-019-0768-5	10.46936/10.25585/60000587
IMG_VR_0598	IMGVR_UViG_3300009182_001507|3300009182|Ga0114959_10007928	IMG_VR v3	Metagenome	3300009182	Linear	7583	Clustered	IMG_VR_0712	NA	NA	NA	NA	NA	10.1093/nar/gkaa946 10.1186/s40168-019-0768-5	10.46936/10.25585/60000587
IMG_VR_0599	IMGVR_UViG_3300009182_001509|3300009182|Ga0114959_10011681	IMG_VR v3	Metagenome	3300009182	Linear	5983	Clustered	IMG_VR_1255	NA	NA	NA	NA	NA	10.1093/nar/gkaa946 10.1186/s40168-019-0768-5	10.46936/10.25585/60000587
IMG_VR_0600	IMGVR_UViG_3300009183_002138|3300009183|Ga0114974_10000518	IMG_VR v3	Metagenome	3300009183	DTR	32223	Seed	IMG_VR_0600	Complete	ATPase MCP Penton PRO	Group 004	SW01 virophages	Maveriviricetes;Priklausovirales;Dishuiviroviridae	10.1093/nar/gkaa946 10.1186/s40168-019-0768-5	10.46936/10.25585/60000587
IMG_VR_0602	IMGVR_UViG_3300009183_002140|3300009183|Ga0114974_10000644	IMG_VR v3	Metagenome	3300009183	Linear	28697	Seed	IMG_VR_0602	Near-complete	ATPase MCP Penton PRO	Group 004	SW01 virophages	Maveriviricetes;Priklausovirales;Dishuiviroviridae	10.1093/nar/gkaa946 10.1186/s40168-019-0768-5	10.46936/10.25585/60000587
IMG_VR_0603	IMGVR_UViG_3300009183_002141|3300009183|Ga0114974_10000724	IMG_VR v3	Metagenome	3300009183	Linear	27214	Seed	IMG_VR_0603	Near-complete	ATPase MCP Penton PRO	Group 005	Large virophages	Maveriviricetes;Priklausovirales;Gulliviroviridae	10.1093/nar/gkaa946 10.1186/s40168-019-0768-5	10.46936/10.25585/60000587
IMG_VR_0604	IMGVR_UViG_3300009183_002142|3300009183|Ga0114974_10000843	IMG_VR v3	Metagenome	3300009183	Linear	24747	Clustered	IMG_VR_0794	NA	NA	NA	NA	NA	10.1093/nar/gkaa946 10.1186/s40168-019-0768-5	10.46936/10.25585/60000587
IMG_VR_0605	IMGVR_UViG_3300009183_002143|3300009183|Ga0114974_10001000	IMG_VR v3	Metagenome	3300009183	DTR	22567	Seed	IMG_VR_0605	Complete	ATPase MCP Penton PRO	Group 004	NA	Maveriviricetes;Unclassified	10.1093/nar/gkaa946 10.1186/s40168-019-0768-5	10.46936/10.25585/60000587
IMG_VR_0606	IMGVR_UViG_3300009183_002144|3300009183|Ga0114974_10004685	IMG_VR v3	Metagenome	3300009183	Linear	10231	Seed	IMG_VR_0606	Partial	MCP Penton PRO	NA	NA	Maveriviricetes;Priklausovirales;Gulliviroviridae	10.1093/nar/gkaa946 10.1186/s40168-019-0768-5	10.46936/10.25585/60000587
IMG_VR_0607	IMGVR_UViG_3300009183_002145|3300009183|Ga0114974_10004954	IMG_VR v3	Metagenome	3300009183	Linear	9938	Clustered	IMG_VR_0617	NA	NA	NA	NA	NA	10.1093/nar/gkaa946 10.1186/s40168-019-0768-5	10.46936/10.25585/60000587
IMG_VR_0608	IMGVR_UViG_3300009183_002151|3300009183|Ga0114974_10010310	IMG_VR v3	Metagenome	3300009183	Linear	6784	Clustered	IMG_VR_0886	NA	NA	NA	NA	NA	10.1093/nar/gkaa946 10.1186/s40168-019-0768-5	10.46936/10.25585/60000587
IMG_VR_0609	IMGVR_UViG_3300009184_001536|3300009184|Ga0114976_10000413	IMG_VR v3	Metagenome	3300009184	DTR	26401	Seed	IMG_VR_0609	Complete	ATPase MCP Penton PRO	Group 003	Aquatic virophages 2	Maveriviricetes;Priklausovirales;Burtonviroviridae	10.1093/nar/gkaa946 10.1186/s40168-019-0768-5	10.46936/10.25585/60000587
IMG_VR_0610	IMGVR_UViG_3300009184_001537|3300009184|Ga0114976_10000581	IMG_VR v3	Metagenome	3300009184	Linear	22934	Clustered	IMG_VR_0600	NA	NA	NA	NA	NA	10.1093/nar/gkaa946 10.1186/s40168-019-0768-5	10.46936/10.25585/60000587
IMG_VR_0611	IMGVR_UViG_3300009184_001538|3300009184|Ga0114976_10000640	IMG_VR v3	Metagenome	3300009184	Linear	21857	Seed	IMG_VR_0611	Partial	MCP Penton PRO	NA	NA	Maveriviricetes;Priklausovirales;Burtonviroviridae	10.1093/nar/gkaa946 10.1186/s40168-019-0768-5	10.46936/10.25585/60000587
IMG_VR_0612	IMGVR_UViG_3300009184_001539|3300009184|Ga0114976_10000833	IMG_VR v3	Metagenome	3300009184	Linear	19499	Clustered	IMG_VR_0564	NA	NA	NA	NA	NA	10.1093/nar/gkaa946 10.1186/s40168-019-0768-5	10.46936/10.25585/60000587
IMG_VR_0613	IMGVR_UViG_3300009184_001540|3300009184|Ga0114976_10001069	IMG_VR v3	Metagenome	3300009184	Linear	17037	Seed	IMG_VR_0613	Partial	ATPase MCP Penton PRO	NA	NA	Maveriviricetes;Unclassified	10.1093/nar/gkaa946 10.1186/s40168-019-0768-5	10.46936/10.25585/60000587
IMG_VR_0614	IMGVR_UViG_3300009184_001541|3300009184|Ga0114976_10001254	IMG_VR v3	Metagenome	3300009184	Linear	15782	Clustered	IMG_VR_0769	NA	NA	NA	NA	NA	10.1093/nar/gkaa946 10.1186/s40168-019-0768-5	10.46936/10.25585/60000587
IMG_VR_0615	IMGVR_UViG_3300009184_001542|3300009184|Ga0114976_10001516	IMG_VR v3	Metagenome	3300009184	Linear	14596	Seed	IMG_VR_0615	Partial	MCP Penton PRO	NA	NA	Maveriviricetes;Priklausovirales;Burtonviroviridae	10.1093/nar/gkaa946 10.1186/s40168-019-0768-5	10.46936/10.25585/60000587
IMG_VR_0616	IMGVR_UViG_3300009184_001544|3300009184|Ga0114976_10001631	IMG_VR v3	Metagenome	3300009184	Linear	14070	Seed	IMG_VR_0616	Partial	ATPase MCP Penton PRO	NA	NA	Maveriviricetes;Unclassified	10.1093/nar/gkaa946 10.1186/s40168-019-0768-5	10.46936/10.25585/60000587
IMG_VR_0617	IMGVR_UViG_3300009184_001545|3300009184|Ga0114976_10001781	IMG_VR v3	Metagenome	3300009184	Linear	13495	Seed	IMG_VR_0617	Partial	ATPase MCP Penton	NA	NA	Maveriviricetes;Priklausovirales;Dishuiviroviridae	10.1093/nar/gkaa946 10.1186/s40168-019-0768-5	10.46936/10.25585/60000587
IMG_VR_0618	IMGVR_UViG_3300009184_001546|3300009184|Ga0114976_10002007	IMG_VR v3	Metagenome	3300009184	Linear	12796	Seed	IMG_VR_0618	Partial	MCP Penton PRO	NA	NA	Maveriviricetes;Priklausovirales;Burtonviroviridae	10.1093/nar/gkaa946 10.1186/s40168-019-0768-5	10.46936/10.25585/60000587
IMG_VR_0619	IMGVR_UViG_3300009184_001548|3300009184|Ga0114976_10002882	IMG_VR v3	Metagenome	3300009184	Linear	10764	Clustered	IMG_VR_1136	NA	NA	NA	NA	NA	10.1093/nar/gkaa946 10.1186/s40168-019-0768-5	10.46936/10.25585/60000587
IMG_VR_0620	IMGVR_UViG_3300009184_001549|3300009184|Ga0114976_10002883	IMG_VR v3	Metagenome	3300009184	Linear	10764	Clustered	IMG_VR_0527	NA	NA	NA	NA	NA	10.1093/nar/gkaa946 10.1186/s40168-019-0768-5	10.46936/10.25585/60000587
IMG_VR_0621	IMGVR_UViG_3300009184_001551|3300009184|Ga0114976_10004397	IMG_VR v3	Metagenome	3300009184	Linear	8774	Clustered	IMG_VR_0529	NA	NA	NA	NA	NA	10.1093/nar/gkaa946 10.1186/s40168-019-0768-5	10.46936/10.25585/60000587
IMG_VR_0622	IMGVR_UViG_3300009184_001552|3300009184|Ga0114976_10005891	IMG_VR v3	Metagenome	3300009184	Linear	7647	Clustered	IMG_VR_0566	NA	NA	NA	NA	NA	10.1093/nar/gkaa946 10.1186/s40168-019-0768-5	10.46936/10.25585/60000587
IMG_VR_0623	IMGVR_UViG_3300009184_001553|3300009184|Ga0114976_10005916	IMG_VR v3	Metagenome	3300009184	Linear	7629	Clustered	IMG_VR_0851	NA	NA	NA	NA	NA	10.1093/nar/gkaa946 10.1186/s40168-019-0768-5	10.46936/10.25585/60000587
IMG_VR_0624	IMGVR_UViG_3300009184_001555|3300009184|Ga0114976_10006815	IMG_VR v3	Metagenome	3300009184	Linear	7092	Clustered	IMG_VR_0884	NA	NA	NA	NA	NA	10.1093/nar/gkaa946 10.1186/s40168-019-0768-5	10.46936/10.25585/60000587
IMG_VR_0625	IMGVR_UViG_3300009184_001557|3300009184|Ga0114976_10007442	IMG_VR v3	Metagenome	3300009184	Linear	6809	Seed	IMG_VR_0625	Partial	MCP Penton PRO	NA	NA	Maveriviricetes;Unclassified	10.1093/nar/gkaa946 10.1186/s40168-019-0768-5	10.46936/10.25585/60000587
IMG_VR_0626	IMGVR_UViG_3300009185_000574|3300009185|Ga0114971_10000316	IMG_VR v3	Metagenome	3300009185	DTR	30914	Clustered	IMG_VR_0548	NA	NA	NA	NA	NA	10.1093/nar/gkaa946 10.1111/1462-2920.14283	10.46936/10.25585/60000587
IMG_VR_0627	IMGVR_UViG_3300009185_000575|3300009185|Ga0114971_10000496	IMG_VR v3	Metagenome	3300009185	DTR	25292	Clustered	IMG_VR_0792	NA	NA	NA	NA	NA	10.1093/nar/gkaa946 10.1111/1462-2920.14283	10.46936/10.25585/60000587
IMG_VR_0628	IMGVR_UViG_3300009185_000576|3300009185|Ga0114971_10000727	IMG_VR v3	Metagenome	3300009185	DTR	22095	Clustered	IMG_VR_0810	NA	NA	NA	NA	NA	10.1093/nar/gkaa946 10.1111/1462-2920.14283	10.46936/10.25585/60000587
IMG_VR_0629	IMGVR_UViG_3300009187_000375|3300009187|Ga0114972_10000447	IMG_VR v3	Metagenome	3300009187	Linear	30681	Clustered	IMG_VR_0548	NA	NA	NA	NA	NA	10.1093/nar/gkaa946 10.1111/1462-2920.14283	10.46936/10.25585/60000587
IMG_VR_0630	IMGVR_UViG_3300009187_000376|3300009187|Ga0114972_10004300	IMG_VR v3	Metagenome	3300009187	Linear	10605	Clustered	IMG_VR_0444	NA	NA	NA	NA	NA	10.1093/nar/gkaa946 10.1111/1462-2920.14283	10.46936/10.25585/60000587
IMG_VR_0631	IMGVR_UViG_3300009372_000752|3300009372|Ga0118718_1017156	IMG_VR v3	Metagenome	3300009372	Linear	8926	Clustered	IMG_VR_0437	NA	NA	NA	NA	NA	10.1093/nar/gkaa946
IMG_VR_0632	IMGVR_UViG_3300009413_000727|3300009413|Ga0114902_1000298	IMG_VR v3	Metagenome	3300009413	Linear	30397	Clustered	PE_179	NA	NA	NA	NA	NA	10.1093/nar/gkaa946 10.1186/s40168-019-0768-5	10.46936/10.25585/60000616
IMG_VR_0633	IMGVR_UViG_3300009418_001139|3300009418|Ga0114908_1000844	IMG_VR v3	Metagenome	3300009418	Linear	16315	Clustered	PE_179	NA	NA	NA	NA	NA	10.1093/nar/gkaa946	10.46936/10.25585/60000616
IMG_VR_0634	IMGVR_UViG_3300009419_000644|3300009419|Ga0114982_1000775	IMG_VR v3	Metagenome	3300009419	Linear	16731	Seed	IMG_VR_0634	Partial	ATPase MCP Penton PRO	NA	NA	Maveriviricetes;Priklausovirales;Gulliviroviridae	10.1038/s41564-018-0312-6 10.1093/nar/gkaa946 10.1186/s40168-019-0768-5	10.46936/10.25585/60001053
IMG_VR_0635	IMGVR_UViG_3300009419_000645|3300009419|Ga0114982_1001210	IMG_VR v3	Metagenome	3300009419	Linear	12941	Clustered	IMG_VR_1257	NA	NA	NA	NA	NA	10.1038/s41564-018-0312-6 10.1093/nar/gkaa946 10.1186/s40168-019-0768-5	10.46936/10.25585/60001053
IMG_VR_0636	IMGVR_UViG_3300009441_000411|3300009441|Ga0115007_10008686	IMG_VR v3	Metagenome	3300009441	Linear	6064	Seed	IMG_VR_0636	Partial	MCP Penton PRO	NA	NA	Maveriviricetes;Mividavirales;Sputniviroviridae	10.1093/nar/gkaa946 10.1186/s40168-022-01254-7	10.46936/10.25585/60000951
IMG_VR_0637	IMGVR_UViG_3300009500_000079|3300009500|Ga0116229_10007006	IMG_VR v3	Metagenome	3300009500	DTR	17860	Seed	IMG_VR_0637	Complete	ATPase MCP Penton PRO	Group 002	Sputnik virophages	Maveriviricetes;Mividavirales;Sputniviroviridae	10.1093/nar/gkaa946 10.1186/s40168-019-0768-5	10.46936/10.25585/60000684
IMG_VR_0638	IMGVR_UViG_3300009505_000570|3300009505|Ga0115564_10005294	IMG_VR v3	Metagenome	3300009505	Linear	10295	Seed	IMG_VR_0638	Partial	ATPase MCP PRO	NA	NA	Maveriviricetes;Mividavirales;Sputniviroviridae	10.1038/s41396-019-0476-y 10.1093/nar/gkaa946	10.46936/10.25585/60000792
IMG_VR_0639	IMGVR_UViG_3300009510_000040|3300009510|Ga0116230_10011928	IMG_VR v3	Metagenome	3300009510	Linear	8560	Seed	IMG_VR_0639	Partial	ATPase MCP Penton PRO	NA	NA	Maveriviricetes;Unclassified	10.1093/nar/gkaa946 10.1128/mbio.03714-21	10.46936/10.25585/60000684
IMG_VR_0640	IMGVR_UViG_3300009518_000047|3300009518|Ga0116128_1002051	IMG_VR v3	Metagenome	3300009518	Linear	8566	Clustered	IMG_VR_0652	NA	NA	NA	NA	NA	10.1093/nar/gkaa946	10.46936/10.25585/60001027
IMG_VR_0642	IMGVR_UViG_3300009547_000009|3300009547|Ga0116136_1000934	IMG_VR v3	Metagenome	3300009547	Linear	15749	Seed	IMG_VR_0642	Partial	ATPase MCP Penton PRO	NA	NA	Maveriviricetes;Mividavirales;Sputniviroviridae	10.1093/nar/gkaa946 10.1186/s40168-019-0768-5	10.46936/10.25585/60001027
IMG_VR_0643	IMGVR_UViG_3300009548_000071|3300009548|Ga0116107_1001113	IMG_VR v3	Metagenome	3300009548	DTR	17026	Seed	IMG_VR_0643	Complete	ATPase MCP Penton PRO	Group 002	Sputnik virophages	Maveriviricetes;Mividavirales;Sputniviroviridae	10.1093/nar/gkaa946 10.1186/s40168-019-0768-5	10.46936/10.25585/60001027
IMG_VR_0644	IMGVR_UViG_3300009548_000072|3300009548|Ga0116107_1001592	IMG_VR v3	Metagenome	3300009548	Linear	13152	Seed	IMG_VR_0644	Partial	ATPase MCP Penton PRO	NA	NA	Maveriviricetes;Unclassified	10.1093/nar/gkaa946 10.1186/s40168-019-0768-5	10.46936/10.25585/60001027
IMG_VR_0645	IMGVR_UViG_3300009548_000073|3300009548|Ga0116107_1003526	IMG_VR v3	Metagenome	3300009548	Linear	7698	Seed	IMG_VR_0645	Partial	ATPase MCP Penton PRO	NA	NA	Maveriviricetes;Mividavirales;Sputniviroviridae	10.1093/nar/gkaa946 10.1186/s40168-019-0768-5	10.46936/10.25585/60001027
IMG_VR_0646	IMGVR_UViG_3300009548_000075|3300009548|Ga0116107_1005684	IMG_VR v3	Metagenome	3300009548	Linear	5751	Seed	IMG_VR_0646	Partial	MCP Penton PRO	NA	NA	Maveriviricetes;Mividavirales;Sputniviroviridae	10.1093/nar/gkaa946 10.1186/s40168-019-0768-5	10.46936/10.25585/60001027
IMG_VR_0648	IMGVR_UViG_3300009602_000687|3300009602|Ga0114900_1001928	IMG_VR v3	Metagenome	3300009602	Linear	12050	Clustered	PE_179	NA	NA	NA	NA	NA	10.1093/nar/gkaa946	10.46936/10.25585/60000616
IMG_VR_0649	IMGVR_UViG_3300009603_000582|3300009603|Ga0114911_1002561	IMG_VR v3	Metagenome	3300009603	Linear	8268	Clustered	PE_179	NA	NA	NA	NA	NA	10.1093/nar/gkaa946	10.46936/10.25585/60000616
IMG_VR_0650	IMGVR_UViG_3300009604_000898|3300009604|Ga0114901_1000567	IMG_VR v3	Metagenome	3300009604	Linear	24551	Clustered	PE_179	NA	NA	NA	NA	NA	10.1093/nar/gkaa946	10.46936/10.25585/60000616
IMG_VR_0651	IMGVR_UViG_3300009605_001500|3300009605|Ga0114906_1000275	IMG_VR v3	Metagenome	3300009605	Linear	30250	Clustered	PE_179	NA	NA	NA	NA	NA	10.1093/nar/gkaa946	10.46936/10.25585/60000616
IMG_VR_0652	IMGVR_UViG_3300009618_000093|3300009618|Ga0116127_1001084	IMG_VR v3	Metagenome	3300009618	Linear	18358	Seed	IMG_VR_0652	Partial	ATPase MCP Penton PRO	NA	NA	Maveriviricetes;Mividavirales;Sputniviroviridae	10.1093/nar/gkaa946 10.1186/s40168-019-0768-5	10.46936/10.25585/60001027
IMG_VR_0653	IMGVR_UViG_3300009618_000094|3300009618|Ga0116127_1001311	IMG_VR v3	Metagenome	3300009618	Linear	15511	Seed	IMG_VR_0653	Partial	ATPase MCP Penton PRO	NA	NA	Maveriviricetes;Mividavirales;Sputniviroviridae	10.1093/nar/gkaa946 10.1186/s40168-019-0768-5	10.46936/10.25585/60001027
IMG_VR_0654	IMGVR_UViG_3300009618_000095|3300009618|Ga0116127_1001795	IMG_VR v3	Metagenome	3300009618	Linear	11857	Clustered	IMG_VR_1066	NA	NA	NA	NA	NA	10.1093/nar/gkaa946 10.1186/s40168-019-0768-5	10.46936/10.25585/60001027
IMG_VR_0655	IMGVR_UViG_3300009618_000096|3300009618|Ga0116127_1002011	IMG_VR v3	Metagenome	3300009618	Linear	10736	Clustered	IMG_VR_0672	NA	NA	NA	NA	NA	10.1093/nar/gkaa946 10.1186/s40168-019-0768-5	10.46936/10.25585/60001027
IMG_VR_0656	IMGVR_UViG_3300009618_000097|3300009618|Ga0116127_1002624	IMG_VR v3	Metagenome	3300009618	Linear	8869	Seed	IMG_VR_0656	Partial	ATPase MCP Penton PRO	NA	NA	Maveriviricetes;Mividavirales;Sputniviroviridae	10.1093/nar/gkaa946 10.1186/s40168-019-0768-5	10.46936/10.25585/60001027
IMG_VR_0657	IMGVR_UViG_3300009618_000098|3300009618|Ga0116127_1004878	IMG_VR v3	Metagenome	3300009618	Linear	5693	Seed	IMG_VR_0657	Partial	ATPase MCP Penton PRO	NA	NA	Maveriviricetes;Unclassified	10.1093/nar/gkaa946 10.1186/s40168-019-0768-5	10.46936/10.25585/60001027
IMG_VR_0658	IMGVR_UViG_3300009618_000099|3300009618|Ga0116127_1005709	IMG_VR v3	Metagenome	3300009618	Linear	5075	Clustered	IMG_VR_0646	NA	NA	NA	NA	NA	10.1093/nar/gkaa946 10.1186/s40168-019-0768-5	10.46936/10.25585/60001027
IMG_VR_0659	IMGVR_UViG_3300009684_000859|3300009684|Ga0114958_10000782	IMG_VR v3	Metagenome	3300009684	ITR	26570	Seed	IMG_VR_0659	Complete	ATPase MCP Penton PRO	Group 003	Aquatic virophages 2	Maveriviricetes;Priklausovirales;Burtonviroviridae	10.1093/nar/gkaa946 10.1186/s40168-019-0768-5	10.46936/10.25585/60000587
IMG_VR_0660	IMGVR_UViG_3300009684_000860|3300009684|Ga0114958_10002157	IMG_VR v3	Metagenome	3300009684	Linear	14924	Seed	IMG_VR_0660	Partial	ATPase MCP Penton PRO	NA	NA	Maveriviricetes;Priklausovirales;Dishuiviroviridae	10.1093/nar/gkaa946 10.1186/s40168-019-0768-5	10.46936/10.25585/60000587
IMG_VR_0661	IMGVR_UViG_3300009684_000861|3300009684|Ga0114958_10002576	IMG_VR v3	Metagenome	3300009684	Linear	13464	Clustered	IMG_VR_0842	NA	NA	NA	NA	NA	10.1093/nar/gkaa946 10.1186/s40168-019-0768-5	10.46936/10.25585/60000587
IMG_VR_0662	IMGVR_UViG_3300009684_000864|3300009684|Ga0114958_10006348	IMG_VR v3	Metagenome	3300009684	Linear	7845	Clustered	IMG_VR_0904	NA	NA	NA	NA	NA	10.1093/nar/gkaa946 10.1186/s40168-019-0768-5	10.46936/10.25585/60000587
IMG_VR_0663	IMGVR_UViG_3300009684_000865|3300009684|Ga0114958_10008062	IMG_VR v3	Metagenome	3300009684	Linear	6808	Clustered	IMG_VR_0723	NA	NA	NA	NA	NA	10.1093/nar/gkaa946 10.1186/s40168-019-0768-5	10.46936/10.25585/60000587
IMG_VR_0664	IMGVR_UViG_3300009685_000253|3300009685|Ga0116142_10008013	IMG_VR v3	Metagenome	3300009685	Linear	8648	Clustered	IMG_VR_0667	NA	NA	NA	NA	NA	10.1093/nar/gkaa946	10.46936/10.25585/60000776
IMG_VR_0665	IMGVR_UViG_3300009687_000263|3300009687|Ga0116144_10008655	IMG_VR v3	Metagenome	3300009687	Linear	8351	Clustered	IMG_VR_0667	NA	NA	NA	NA	NA	10.1093/nar/gkaa946	10.46936/10.25585/60000776
IMG_VR_0666	IMGVR_UViG_3300009688_000151|3300009688|Ga0116176_10011669	IMG_VR v3	Metagenome	3300009688	Linear	5780	Clustered	IMG_VR_0674	NA	NA	NA	NA	NA	10.1093/nar/gkaa946	10.46936/10.25585/60000776
IMG_VR_0667	IMGVR_UViG_3300009690_000304|3300009690|Ga0116143_10003940	IMG_VR v3	Metagenome	3300009690	Linear	14537	Seed	IMG_VR_0667	Partial	ATPase MCP Penton PRO	NA	NA	Maveriviricetes;Unclassified	10.1093/nar/gkaa946 10.1186/s40168-019-0768-5	10.46936/10.25585/60000776
IMG_VR_0668	IMGVR_UViG_3300009696_000164|3300009696|Ga0116177_10015053	IMG_VR v3	Metagenome	3300009696	Linear	5261	Clustered	IMG_VR_0674	NA	NA	NA	NA	NA	10.1093/nar/gkaa946	10.46936/10.25585/60000776
IMG_VR_0669	IMGVR_UViG_3300009697_000059|3300009697|Ga0116231_10017657	IMG_VR v3	Metagenome	3300009697	Linear	8491	Seed	IMG_VR_0669	Partial	ATPase MCP Penton	NA	NA	Maveriviricetes;Priklausovirales;Omnilimnoviroviridae	10.1093/nar/gkaa946 10.1128/mbio.03714-21	10.46936/10.25585/60000684
IMG_VR_0670	IMGVR_UViG_3300009711_000169|3300009711|Ga0116166_1004262	IMG_VR v3	Metagenome	3300009711	Linear	10583	Seed	IMG_VR_0670	Partial	ATPase MCP Penton PRO	NA	NA	Maveriviricetes;Mividavirales;Sputniviroviridae	10.1093/nar/gkaa946 10.1186/s40168-019-0768-5	10.46936/10.25585/60000776
IMG_VR_0671	IMGVR_UViG_3300009712_000155|3300009712|Ga0116165_1005595	IMG_VR v3	Metagenome	3300009712	Linear	7531	Clustered	IMG_VR_0670	NA	NA	NA	NA	NA	10.1093/nar/gkaa946	10.46936/10.25585/60000776
IMG_VR_0672	IMGVR_UViG_3300009760_000045|3300009760|Ga0116131_1001150	IMG_VR v3	Metagenome	3300009760	Linear	16771	Seed	IMG_VR_0672	Near-complete	ATPase MCP Penton PRO	Group 002	Sputnik virophages	Maveriviricetes;Mividavirales;Sputniviroviridae	10.1093/nar/gkaa946 10.1186/s40168-019-0768-5	10.46936/10.25585/60001027
IMG_VR_0673	IMGVR_UViG_3300009760_000046|3300009760|Ga0116131_1001596	IMG_VR v3	Metagenome	3300009760	Linear	13119	Clustered	IMG_VR_0653	NA	NA	NA	NA	NA	10.1093/nar/gkaa946 10.1186/s40168-019-0768-5	10.46936/10.25585/60001027
IMG_VR_0674	IMGVR_UViG_3300009781_000125|3300009781|Ga0116178_10003357	IMG_VR v3	Metagenome	3300009781	Linear	12195	Seed	IMG_VR_0674	Partial	ATPase MCP Penton PRO	NA	NA	Maveriviricetes;Unclassified	10.1093/nar/gkaa946 10.1186/s40168-019-0768-5	10.46936/10.25585/60000776
IMG_VR_0675	IMGVR_UViG_3300009784_000110|3300009784|Ga0123357_10042330	IMG_VR v3	Metagenome	3300009784	Linear	6194	Seed	IMG_VR_0675	Partial	MCP Penton PRO	NA	NA	Maveriviricetes;Unclassified	10.1093/nar/gkaa946 10.1111/mec.15322	10.46936/10.25585/60000866
IMG_VR_0676	IMGVR_UViG_3300010157_001360|3300010157|Ga0114964_10000265|7050-40371	IMG_VR v3	Metagenome	3300010157	Integrated	33322	Clustered	IMG_VR_0457	NA	NA	NA	NA	NA	10.1093/nar/gkaa946 10.1186/s40168-019-0768-5	10.46936/10.25585/60000587
IMG_VR_0677	IMGVR_UViG_3300010157_001361|3300010157|Ga0114964_10000489	IMG_VR v3	Metagenome	3300010157	Linear	30489	Clustered	IMG_VR_1276	NA	NA	NA	NA	NA	10.1093/nar/gkaa946 10.1186/s40168-019-0768-5	10.46936/10.25585/60000587
IMG_VR_0678	IMGVR_UViG_3300010157_001362|3300010157|Ga0114964_10000508	IMG_VR v3	Metagenome	3300010157	Linear	29990	Clustered	IMG_VR_1361	NA	NA	NA	NA	NA	10.1093/nar/gkaa946 10.1186/s40168-019-0768-5	10.46936/10.25585/60000587
IMG_VR_0679	IMGVR_UViG_3300010157_001363|3300010157|Ga0114964_10000599	IMG_VR v3	Metagenome	3300010157	Linear	28008	Seed	IMG_VR_0679	Near-complete	ATPase MCP Penton PRO	Group 005	Large virophages	Maveriviricetes;Priklausovirales;Gulliviroviridae	10.1093/nar/gkaa946 10.1186/s40168-019-0768-5	10.46936/10.25585/60000587
IMG_VR_0680	IMGVR_UViG_3300010157_001364|3300010157|Ga0114964_10000624	IMG_VR v3	Metagenome	3300010157	Linear	27184	Seed	IMG_VR_0680	Near-complete	ATPase MCP Penton PRO	Group 003	Aquatic virophages 2	Maveriviricetes;Priklausovirales;Burtonviroviridae	10.1093/nar/gkaa946 10.1186/s40168-019-0768-5	10.46936/10.25585/60000587
IMG_VR_0681	IMGVR_UViG_3300010157_001365|3300010157|Ga0114964_10000625	IMG_VR v3	Metagenome	3300010157	DTR	27029	Clustered	IMG_VR_0462	NA	NA	NA	NA	NA	10.1093/nar/gkaa946 10.1186/s40168-019-0768-5	10.46936/10.25585/60000587
IMG_VR_0682	IMGVR_UViG_3300010157_001366|3300010157|Ga0114964_10000643	IMG_VR v3	Metagenome	3300010157	DTR	26553	Clustered	IMG_VR_0464	NA	NA	NA	NA	NA	10.1093/nar/gkaa946 10.1186/s40168-019-0768-5	10.46936/10.25585/60000587
IMG_VR_0683	IMGVR_UViG_3300010157_001367|3300010157|Ga0114964_10000649	IMG_VR v3	Metagenome	3300010157	Linear	26603	Clustered	IMG_VR_0765	NA	NA	NA	NA	NA	10.1093/nar/gkaa946 10.1186/s40168-019-0768-5	10.46936/10.25585/60000587
IMG_VR_0684	IMGVR_UViG_3300010157_001368|3300010157|Ga0114964_10000880	IMG_VR v3	Metagenome	3300010157	DTR	22316	Seed	IMG_VR_0684	Complete	ATPase MCP PRO	NA	NA	Maveriviricetes;Unclassified	10.1093/nar/gkaa946 10.1186/s40168-019-0768-5	10.46936/10.25585/60000587
IMG_VR_0685	IMGVR_UViG_3300010157_001369|3300010157|Ga0114964_10000881	IMG_VR v3	Metagenome	3300010157	Linear	22399	Seed	IMG_VR_0685	Partial	ATPase MCP Penton	NA	NA	Maveriviricetes;Priklausovirales;Dishuiviroviridae	10.1093/nar/gkaa946 10.1186/s40168-019-0768-5	10.46936/10.25585/60000587
IMG_VR_0686	IMGVR_UViG_3300010157_001370|3300010157|Ga0114964_10000928	IMG_VR v3	Metagenome	3300010157	Linear	21707	Clustered	IMG_VR_0502	NA	NA	NA	NA	NA	10.1093/nar/gkaa946 10.1186/s40168-019-0768-5	10.46936/10.25585/60000587
IMG_VR_0687	IMGVR_UViG_3300010157_001371|3300010157|Ga0114964_10001184	IMG_VR v3	Metagenome	3300010157	Linear	19236	Clustered	IMG_VR_0822	NA	NA	NA	NA	NA	10.1093/nar/gkaa946 10.1186/s40168-019-0768-5	10.46936/10.25585/60000587
IMG_VR_0688	IMGVR_UViG_3300010157_001372|3300010157|Ga0114964_10001356	IMG_VR v3	Metagenome	3300010157	Linear	17871	Seed	IMG_VR_0688	Partial	ATPase MCP Penton PRO	NA	NA	Maveriviricetes;Unclassified	10.1093/nar/gkaa946 10.1186/s40168-019-0768-5	10.46936/10.25585/60000587
IMG_VR_0689	IMGVR_UViG_3300010157_001373|3300010157|Ga0114964_10001382	IMG_VR v3	Metagenome	3300010157	Linear	17717	Seed	IMG_VR_0689	Partial	ATPase MCP Penton PRO	NA	NA	Maveriviricetes;Priklausovirales;Dishuiviroviridae	10.1093/nar/gkaa946 10.1186/s40168-019-0768-5	10.46936/10.25585/60000587
IMG_VR_0690	IMGVR_UViG_3300010157_001374|3300010157|Ga0114964_10001616	IMG_VR v3	Metagenome	3300010157	Linear	16333	Clustered	IMG_VR_1365	NA	NA	NA	NA	NA	10.1093/nar/gkaa946 10.1186/s40168-019-0768-5	10.46936/10.25585/60000587
IMG_VR_0691	IMGVR_UViG_3300010157_001375|3300010157|Ga0114964_10001848	IMG_VR v3	Metagenome	3300010157	Linear	15323	Clustered	IMG_VR_0841	NA	NA	NA	NA	NA	10.1093/nar/gkaa946 10.1186/s40168-019-0768-5	10.46936/10.25585/60000587
IMG_VR_0692	IMGVR_UViG_3300010157_001376|3300010157|Ga0114964_10002347	IMG_VR v3	Metagenome	3300010157	Linear	13207	Seed	IMG_VR_0692	Partial	ATPase MCP Penton PRO	NA	NA	Maveriviricetes;Unclassified	10.1093/nar/gkaa946 10.1186/s40168-019-0768-5	10.46936/10.25585/60000587
IMG_VR_0693	IMGVR_UViG_3300010157_001377|3300010157|Ga0114964_10002594	IMG_VR v3	Metagenome	3300010157	Linear	12551	Clustered	IMG_VR_1277	NA	NA	NA	NA	NA	10.1093/nar/gkaa946 10.1186/s40168-019-0768-5	10.46936/10.25585/60000587
IMG_VR_0694	IMGVR_UViG_3300010157_001379|3300010157|Ga0114964_10002903	IMG_VR v3	Metagenome	3300010157	Linear	11800	Seed	IMG_VR_0694	Partial	ATPase MCP Penton PRO	NA	NA	Maveriviricetes;Priklausovirales;Burtonviroviridae	10.1093/nar/gkaa946 10.1186/s40168-019-0768-5	10.46936/10.25585/60000587
IMG_VR_0695	IMGVR_UViG_3300010157_001380|3300010157|Ga0114964_10002917	IMG_VR v3	Metagenome	3300010157	Linear	11763	Clustered	IMG_VR_0461	NA	NA	NA	NA	NA	10.1093/nar/gkaa946 10.1186/s40168-019-0768-5	10.46936/10.25585/60000587
IMG_VR_0696	IMGVR_UViG_3300010157_001381|3300010157|Ga0114964_10003108	IMG_VR v3	Metagenome	3300010157	Linear	11325	Seed	IMG_VR_0696	Partial	ATPase MCP Penton PRO	NA	NA	Maveriviricetes;Priklausovirales;Burtonviroviridae	10.1093/nar/gkaa946 10.1186/s40168-019-0768-5	10.46936/10.25585/60000587
IMG_VR_0697	IMGVR_UViG_3300010157_001382|3300010157|Ga0114964_10003708	IMG_VR v3	Metagenome	3300010157	Linear	10241	Seed	IMG_VR_0697	Partial	MCP Penton PRO	NA	NA	Maveriviricetes;Priklausovirales;Burtonviroviridae	10.1093/nar/gkaa946 10.1186/s40168-019-0768-5	10.46936/10.25585/60000587
IMG_VR_0698	IMGVR_UViG_3300010157_001383|3300010157|Ga0114964_10003883	IMG_VR v3	Metagenome	3300010157	Linear	9921	Seed	IMG_VR_0698	Partial	MCP Penton PRO	NA	NA	Maveriviricetes;Priklausovirales;Burtonviroviridae	10.1093/nar/gkaa946 10.1186/s40168-019-0768-5	10.46936/10.25585/60000587
IMG_VR_0699	IMGVR_UViG_3300010157_001384|3300010157|Ga0114964_10004008	IMG_VR v3	Metagenome	3300010157	Linear	9757	Clustered	IMG_VR_0659	NA	NA	NA	NA	NA	10.1093/nar/gkaa946 10.1186/s40168-019-0768-5	10.46936/10.25585/60000587
IMG_VR_0700	IMGVR_UViG_3300010157_001385|3300010157|Ga0114964_10004463	IMG_VR v3	Metagenome	3300010157	Linear	9198	Clustered	IMG_VR_0468	NA	NA	NA	NA	NA	10.1093/nar/gkaa946 10.1186/s40168-019-0768-5	10.46936/10.25585/60000587
IMG_VR_0701	IMGVR_UViG_3300010157_001387|3300010157|Ga0114964_10004746	IMG_VR v3	Metagenome	3300010157	Linear	8899	Clustered	IMG_VR_0903	NA	NA	NA	NA	NA	10.1093/nar/gkaa946 10.1186/s40168-019-0768-5	10.46936/10.25585/60000587
IMG_VR_0702	IMGVR_UViG_3300010157_001389|3300010157|Ga0114964_10005090	IMG_VR v3	Metagenome	3300010157	Linear	8557	Seed	IMG_VR_0702	Partial	MCP Penton PRO	NA	NA	Maveriviricetes;Priklausovirales;Gulliviroviridae	10.1093/nar/gkaa946 10.1186/s40168-019-0768-5	10.46936/10.25585/60000587
IMG_VR_0703	IMGVR_UViG_3300010157_001390|3300010157|Ga0114964_10005632	IMG_VR v3	Metagenome	3300010157	Linear	8048	Clustered	IMG_VR_0594	NA	NA	NA	NA	NA	10.1093/nar/gkaa946 10.1186/s40168-019-0768-5	10.46936/10.25585/60000587
IMG_VR_0704	IMGVR_UViG_3300010157_001391|3300010157|Ga0114964_10006167	IMG_VR v3	Metagenome	3300010157	Linear	7668	Clustered	IMG_VR_1268	NA	NA	NA	NA	NA	10.1093/nar/gkaa946 10.1186/s40168-019-0768-5	10.46936/10.25585/60000587
IMG_VR_0705	IMGVR_UViG_3300010157_001393|3300010157|Ga0114964_10007047	IMG_VR v3	Metagenome	3300010157	Linear	7103	Seed	IMG_VR_0705	Partial	MCP Penton PRO	NA	NA	Maveriviricetes;Priklausovirales;Burtonviroviridae	10.1093/nar/gkaa946 10.1186/s40168-019-0768-5	10.46936/10.25585/60000587
IMG_VR_0706	IMGVR_UViG_3300010157_001395|3300010157|Ga0114964_10007186	IMG_VR v3	Metagenome	3300010157	Linear	7011	Clustered	IMG_VR_0894	NA	NA	NA	NA	NA	10.1093/nar/gkaa946 10.1186/s40168-019-0768-5	10.46936/10.25585/60000587
IMG_VR_0707	IMGVR_UViG_3300010157_001398|3300010157|Ga0114964_10011097	IMG_VR v3	Metagenome	3300010157	Linear	5454	Clustered	IMG_VR_0908	NA	NA	NA	NA	NA	10.1093/nar/gkaa946 10.1186/s40168-019-0768-5	10.46936/10.25585/60000587
IMG_VR_0708	IMGVR_UViG_3300010158_001668|3300010158|Ga0114960_10000582	IMG_VR v3	Metagenome	3300010158	Linear	30579	Clustered	IMG_VR_1276	NA	NA	NA	NA	NA	10.1093/nar/gkaa946 10.1111/1462-2920.14283 10.1186/s40168-019-0768-5	10.46936/10.25585/60000587
IMG_VR_0709	IMGVR_UViG_3300010158_001669|3300010158|Ga0114960_10000586	IMG_VR v3	Metagenome	3300010158	Linear	30482	Clustered	IMG_VR_0767	NA	NA	NA	NA	NA	10.1093/nar/gkaa946 10.1111/1462-2920.14283 10.1186/s40168-019-0768-5	10.46936/10.25585/60000587
IMG_VR_0710	IMGVR_UViG_3300010158_001670|3300010158|Ga0114960_10000743	IMG_VR v3	Metagenome	3300010158	Linear	27036	Clustered	IMG_VR_0462	NA	NA	NA	NA	NA	10.1093/nar/gkaa946 10.1111/1462-2920.14283 10.1186/s40168-019-0768-5	10.46936/10.25585/60000587
IMG_VR_0711	IMGVR_UViG_3300010158_001671|3300010158|Ga0114960_10000746	IMG_VR v3	Metagenome	3300010158	Linear	26908	Clustered	IMG_VR_1254	NA	NA	NA	NA	NA	10.1093/nar/gkaa946 10.1111/1462-2920.14283 10.1186/s40168-019-0768-5	10.46936/10.25585/60000587
IMG_VR_0712	IMGVR_UViG_3300010158_001672|3300010158|Ga0114960_10000772	IMG_VR v3	Metagenome	3300010158	DTR	26192	Seed	IMG_VR_0712	Complete	ATPase MCP Penton PRO	Group 003	Aquatic virophages 2	Maveriviricetes;Priklausovirales;Burtonviroviridae	10.1093/nar/gkaa946 10.1111/1462-2920.14283 10.1186/s40168-019-0768-5	10.46936/10.25585/60000587
IMG_VR_0713	IMGVR_UViG_3300010158_001673|3300010158|Ga0114960_10000908	IMG_VR v3	Metagenome	3300010158	DTR	24280	Clustered	IMG_VR_0592	NA	NA	NA	NA	NA	10.1093/nar/gkaa946 10.1111/1462-2920.14283 10.1186/s40168-019-0768-5	10.46936/10.25585/60000587
IMG_VR_0714	IMGVR_UViG_3300010158_001674|3300010158|Ga0114960_10001476	IMG_VR v3	Metagenome	3300010158	Linear	18818	Clustered	IMG_VR_1144	NA	NA	NA	NA	NA	10.1093/nar/gkaa946 10.1111/1462-2920.14283 10.1186/s40168-019-0768-5	10.46936/10.25585/60000587
IMG_VR_0715	IMGVR_UViG_3300010158_001675|3300010158|Ga0114960_10001890	IMG_VR v3	Metagenome	3300010158	Linear	16647	Clustered	IMG_VR_0461	NA	NA	NA	NA	NA	10.1093/nar/gkaa946 10.1111/1462-2920.14283 10.1186/s40168-019-0768-5	10.46936/10.25585/60000587
IMG_VR_0716	IMGVR_UViG_3300010158_001676|3300010158|Ga0114960_10001945	IMG_VR v3	Metagenome	3300010158	Linear	16357	Seed	IMG_VR_0716	Partial	ATPase MCP Penton PRO	NA	NA	Maveriviricetes;Priklausovirales;Omnilimnoviroviridae	10.1093/nar/gkaa946 10.1111/1462-2920.14283 10.1186/s40168-019-0768-5	10.46936/10.25585/60000587
IMG_VR_0717	IMGVR_UViG_3300010158_001677|3300010158|Ga0114960_10002393	IMG_VR v3	Metagenome	3300010158	Linear	14653	Clustered	IMG_VR_1369	NA	NA	NA	NA	NA	10.1093/nar/gkaa946 10.1111/1462-2920.14283 10.1186/s40168-019-0768-5	10.46936/10.25585/60000587
IMG_VR_0718	IMGVR_UViG_3300010158_001679|3300010158|Ga0114960_10002870	IMG_VR v3	Metagenome	3300010158	Linear	13285	Clustered	IMG_VR_0464	NA	NA	NA	NA	NA	10.1093/nar/gkaa946 10.1111/1462-2920.14283 10.1186/s40168-019-0768-5	10.46936/10.25585/60000587
IMG_VR_0719	IMGVR_UViG_3300010158_001680|3300010158|Ga0114960_10002925	IMG_VR v3	Metagenome	3300010158	Linear	13184	Seed	IMG_VR_0719	Partial	ATPase MCP Penton	NA	NA	Maveriviricetes;Priklausovirales;Dishuiviroviridae	10.1093/nar/gkaa946 10.1111/1462-2920.14283 10.1186/s40168-019-0768-5	10.46936/10.25585/60000587
IMG_VR_0720	IMGVR_UViG_3300010158_001682|3300010158|Ga0114960_10003591	IMG_VR v3	Metagenome	3300010158	Linear	11812	Clustered	IMG_VR_0797	NA	NA	NA	NA	NA	10.1093/nar/gkaa946 10.1111/1462-2920.14283 10.1186/s40168-019-0768-5	10.46936/10.25585/60000587
IMG_VR_0721	IMGVR_UViG_3300010158_001683|3300010158|Ga0114960_10005085	IMG_VR v3	Metagenome	3300010158	Linear	9723	Clustered	IMG_VR_0473	NA	NA	NA	NA	NA	10.1093/nar/gkaa946 10.1111/1462-2920.14283 10.1186/s40168-019-0768-5	10.46936/10.25585/60000587
IMG_VR_0722	IMGVR_UViG_3300010158_001684|3300010158|Ga0114960_10005706	IMG_VR v3	Metagenome	3300010158	Linear	9097	Clustered	IMG_VR_0659	NA	NA	NA	NA	NA	10.1093/nar/gkaa946 10.1111/1462-2920.14283 10.1186/s40168-019-0768-5	10.46936/10.25585/60000587
IMG_VR_0723	IMGVR_UViG_3300010158_001686|3300010158|Ga0114960_10008440	IMG_VR v3	Metagenome	3300010158	Linear	7223	Seed	IMG_VR_0723	Partial	MCP Penton PRO	NA	NA	Maveriviricetes;Unclassified	10.1093/nar/gkaa946 10.1111/1462-2920.14283 10.1186/s40168-019-0768-5	10.46936/10.25585/60000587
IMG_VR_0724	IMGVR_UViG_3300010158_001688|3300010158|Ga0114960_10011635	IMG_VR v3	Metagenome	3300010158	Linear	5981	Clustered	IMG_VR_1255	NA	NA	NA	NA	NA	10.1093/nar/gkaa946 10.1111/1462-2920.14283 10.1186/s40168-019-0768-5	10.46936/10.25585/60000587
IMG_VR_0725	IMGVR_UViG_3300010158_001690|3300010158|Ga0114960_10013841	IMG_VR v3	Metagenome	3300010158	Linear	5422	Clustered	IMG_VR_0913	NA	NA	NA	NA	NA	10.1093/nar/gkaa946 10.1111/1462-2920.14283 10.1186/s40168-019-0768-5	10.46936/10.25585/60000587
IMG_VR_0726	IMGVR_UViG_3300010160_001425|3300010160|Ga0114967_10000584	IMG_VR v3	Metagenome	3300010160	Linear	31387	Clustered	IMG_VR_1283	NA	NA	NA	NA	NA	10.1093/nar/gkaa946 10.1186/s40168-019-0768-5	10.46936/10.25585/60000587
IMG_VR_0727	IMGVR_UViG_3300010160_001426|3300010160|Ga0114967_10001208	IMG_VR v3	Metagenome	3300010160	Linear	21639	Seed	IMG_VR_0727	Partial	MCP Penton PRO	NA	NA	Maveriviricetes;Priklausovirales;Omnilimnoviroviridae	10.1093/nar/gkaa946 10.1186/s40168-019-0768-5	10.46936/10.25585/60000587
IMG_VR_0728	IMGVR_UViG_3300010160_001427|3300010160|Ga0114967_10001239	IMG_VR v3	Metagenome	3300010160	Linear	21290	Clustered	IMG_VR_0587	NA	NA	NA	NA	NA	10.1093/nar/gkaa946 10.1186/s40168-019-0768-5	10.46936/10.25585/60000587
IMG_VR_0729	IMGVR_UViG_3300010160_001428|3300010160|Ga0114967_10002257	IMG_VR v3	Metagenome	3300010160	Linear	16163	Seed	IMG_VR_0729	Partial	ATPase MCP Penton PRO	NA	NA	Maveriviricetes;Priklausovirales;Burtonviroviridae	10.1093/nar/gkaa946 10.1186/s40168-019-0768-5	10.46936/10.25585/60000587
IMG_VR_0730	IMGVR_UViG_3300010160_001429|3300010160|Ga0114967_10006550	IMG_VR v3	Metagenome	3300010160	Linear	9120	Clustered	IMG_VR_0853	NA	NA	NA	NA	NA	10.1093/nar/gkaa946 10.1186/s40168-019-0768-5	10.46936/10.25585/60000587
IMG_VR_0731	IMGVR_UViG_3300010160_001430|3300010160|Ga0114967_10008849	IMG_VR v3	Metagenome	3300010160	Linear	7686	Seed	IMG_VR_0731	Partial	ATPase MCP Penton PRO	NA	NA	Maveriviricetes;Mividavirales;Sputniviroviridae	10.1093/nar/gkaa946 10.1186/s40168-019-0768-5	10.46936/10.25585/60000587
IMG_VR_0732	IMGVR_UViG_3300010160_001431|3300010160|Ga0114967_10010870	IMG_VR v3	Metagenome	3300010160	Linear	6839	Clustered	IMG_VR_0519	NA	NA	NA	NA	NA	10.1093/nar/gkaa946 10.1186/s40168-019-0768-5	10.46936/10.25585/60000587
IMG_VR_0733	IMGVR_UViG_3300010160_001432|3300010160|Ga0114967_10013750	IMG_VR v3	Metagenome	3300010160	Linear	5927	Clustered	IMG_VR_0798	NA	NA	NA	NA	NA	10.1093/nar/gkaa946 10.1186/s40168-019-0768-5	10.46936/10.25585/60000587
IMG_VR_0734	IMGVR_UViG_3300010316_000600|3300010316|Ga0136655_1003793	IMG_VR v3	Metagenome	3300010316	Linear	6169	Seed	IMG_VR_0734	Partial	ATPase MCP PRO	NA	NA	Maveriviricetes;Mividavirales;Sputniviroviridae	10.1093/nar/gkaa946 10.1128/AEM.00137-18	10.46936/10.25585/60000748
IMG_VR_0735	IMGVR_UViG_3300010316_000601|3300010316|Ga0136655_1005278	IMG_VR v3	Metagenome	3300010316	Linear	5031	Seed	IMG_VR_0735	Partial	ATPase MCP PRO	NA	NA	Maveriviricetes;Mividavirales;Sputniviroviridae	10.1093/nar/gkaa946 10.1128/AEM.00137-18	10.46936/10.25585/60000748
IMG_VR_0736	IMGVR_UViG_3300010334_001488|3300010334|Ga0136644_10000572	IMG_VR v3	Metagenome	3300010334	DTR	29287	Seed	IMG_VR_0736	Complete	ATPase MCP Penton PRO	Group 004	SW01 virophages	Maveriviricetes;Priklausovirales;Dishuiviroviridae	10.1093/nar/gkaa946 10.1186/s40168-019-0768-5	10.46936/10.25585/60000587
IMG_VR_0737	IMGVR_UViG_3300010334_001489|3300010334|Ga0136644_10000690	IMG_VR v3	Metagenome	3300010334	Linear	26908	Clustered	IMG_VR_1254	NA	NA	NA	NA	NA	10.1093/nar/gkaa946 10.1186/s40168-019-0768-5	10.46936/10.25585/60000587
IMG_VR_0738	IMGVR_UViG_3300010334_001490|3300010334|Ga0136644_10000910	IMG_VR v3	Metagenome	3300010334	Linear	23658	Clustered	IMG_VR_0498	NA	NA	NA	NA	NA	10.1093/nar/gkaa946 10.1186/s40168-019-0768-5	10.46936/10.25585/60000587
IMG_VR_0739	IMGVR_UViG_3300010334_001491|3300010334|Ga0136644_10000964	IMG_VR v3	Metagenome	3300010334	Linear	22952	Clustered	IMG_VR_0804	NA	NA	NA	NA	NA	10.1093/nar/gkaa946 10.1186/s40168-019-0768-5	10.46936/10.25585/60000587
IMG_VR_0740	IMGVR_UViG_3300010334_001492|3300010334|Ga0136644_10001697	IMG_VR v3	Metagenome	3300010334	Linear	17330	Clustered	IMG_VR_1268	NA	NA	NA	NA	NA	10.1093/nar/gkaa946 10.1186/s40168-019-0768-5	10.46936/10.25585/60000587
IMG_VR_0741	IMGVR_UViG_3300010334_001493|3300010334|Ga0136644_10001884	IMG_VR v3	Metagenome	3300010334	Linear	16321	Clustered	IMG_VR_0812	NA	NA	NA	NA	NA	10.1093/nar/gkaa946 10.1186/s40168-019-0768-5	10.46936/10.25585/60000587
IMG_VR_0742	IMGVR_UViG_3300010334_001494|3300010334|Ga0136644_10001890	IMG_VR v3	Metagenome	3300010334	Linear	16299	Seed	IMG_VR_0742	Partial	ATPase MCP Penton	NA	NA	Maveriviricetes;Priklausovirales;Dishuiviroviridae	10.1093/nar/gkaa946 10.1186/s40168-019-0768-5	10.46936/10.25585/60000587
IMG_VR_0743	IMGVR_UViG_3300010334_001495|3300010334|Ga0136644_10002842	IMG_VR v3	Metagenome	3300010334	Linear	13068	Clustered	IMG_VR_0468	NA	NA	NA	NA	NA	10.1093/nar/gkaa946 10.1186/s40168-019-0768-5	10.46936/10.25585/60000587
IMG_VR_0744	IMGVR_UViG_3300010334_001497|3300010334|Ga0136644_10003244	IMG_VR v3	Metagenome	3300010334	Linear	12197	Clustered	IMG_VR_0500	NA	NA	NA	NA	NA	10.1093/nar/gkaa946 10.1186/s40168-019-0768-5	10.46936/10.25585/60000587
IMG_VR_0745	IMGVR_UViG_3300010334_001498|3300010334|Ga0136644_10003505	IMG_VR v3	Metagenome	3300010334	Linear	11744	Clustered	IMG_VR_0835	NA	NA	NA	NA	NA	10.1093/nar/gkaa946 10.1186/s40168-019-0768-5	10.46936/10.25585/60000587
IMG_VR_0746	IMGVR_UViG_3300010334_001500|3300010334|Ga0136644_10011070	IMG_VR v3	Metagenome	3300010334	Linear	6279	Seed	IMG_VR_0746	Partial	ATPase MCP Penton PRO	NA	NA	Maveriviricetes;Unclassified	10.1093/nar/gkaa946 10.1186/s40168-019-0768-5	10.46936/10.25585/60000587
IMG_VR_0747	IMGVR_UViG_3300010343_000040|3300010343|Ga0074044_10005879	IMG_VR v3	Metagenome	3300010343	Linear	9909	Seed	IMG_VR_0747	Partial	ATPase MCP Penton PRO	NA	NA	Maveriviricetes;Mividavirales;Sputniviroviridae	10.1038/s41396-018-0334-3 10.1093/nar/gkaa946	10.46936/10.25585/60000575
IMG_VR_0748	IMGVR_UViG_3300010354_001120|3300010354|Ga0129333_10000799	IMG_VR v3	Metagenome	3300010354	DTR	27427	Seed	IMG_VR_0748	Complete	ATPase MCP Penton PRO	Group 004	SW01 virophages	Maveriviricetes;Priklausovirales;Dishuiviroviridae	10.1093/nar/gkaa946 10.1128/AEM.00137-18 10.1186/s40168-019-0768-5	10.46936/10.25585/60000748
IMG_VR_0749	IMGVR_UViG_3300010354_001121|3300010354|Ga0129333_10001104	IMG_VR v3	Metagenome	3300010354	Linear	24078	Seed	IMG_VR_0749	Partial	ATPase MCP Penton PRO	NA	NA	Maveriviricetes;Unclassified	10.1093/nar/gkaa946 10.1128/AEM.00137-18 10.1186/s40168-019-0768-5	10.46936/10.25585/60000748
IMG_VR_0750	IMGVR_UViG_3300010368_001464|3300010368|Ga0129324_10003532	IMG_VR v3	Metagenome	3300010368	Linear	9277	Seed	IMG_VR_0750	Partial	ATPase MCP Penton	NA	NA	Maveriviricetes;Priklausovirales;Omnilimnoviroviridae	10.1093/nar/gkaa946 10.1128/AEM.00137-18	10.46936/10.25585/60000748
IMG_VR_0751	IMGVR_UViG_3300010370_001896|3300010370|Ga0129336_10000987	IMG_VR v3	Metagenome	3300010370	Linear	16942	Seed	IMG_VR_0751	Partial	ATPase MCP Penton	NA	NA	Maveriviricetes;Priklausovirales;Dishuiviroviridae	10.1093/nar/gkaa946 10.1128/AEM.00137-18 10.1186/s40168-019-0768-5	10.46936/10.25585/60000748
IMG_VR_0758	IMGVR_UViG_3300010413_000355|3300010413|Ga0136851_10008908	IMG_VR v3	Metagenome	3300010413	DTR	20920	Seed	IMG_VR_0758	Complete	ATPase MCP Penton PRO	NA	NA	Maveriviricetes;Unclassified	10.1093/nar/gkaa946
IMG_VR_0759	IMGVR_UViG_3300010430_001586|3300010430|Ga0118733_100027998	IMG_VR v3	Metagenome	3300010430	Linear	12617	Clustered	IMG_VR_0202	NA	NA	NA	NA	NA	10.1093/nar/gkaa946 10.1186/s40168-019-0768-5	10.46936/10.25585/60000564
IMG_VR_0760	IMGVR_UViG_3300010430_001587|3300010430|Ga0118733_100031587	IMG_VR v3	Metagenome	3300010430	Linear	11700	Seed	IMG_VR_0760	Partial	ATPase MCP Penton PRO	NA	NA	Maveriviricetes;Mividavirales;Sputniviroviridae	10.1093/nar/gkaa946 10.1186/s40168-019-0768-5	10.46936/10.25585/60000564
IMG_VR_0761	IMGVR_UViG_3300010882_000104|3300010882|Ga0123354_10052392	IMG_VR v3	Metagenome	3300010882	Linear	6148	Seed	IMG_VR_0761	Partial	MCP Penton PRO	NA	NA	Maveriviricetes;Unclassified	10.1093/nar/gkaa946 10.1111/mec.15322	10.46936/10.25585/60000866
IMG_VR_0762	IMGVR_UViG_3300010883_004607|3300010883|Ga0133547_10022499	IMG_VR v3	Metagenome	3300010883	Linear	16070	Seed	IMG_VR_0762	Partial	ATPase MCP Penton PRO	NA	NA	Maveriviricetes;Priklausovirales;Omnilimnoviroviridae	10.1038/s42003-018-0086-7 10.1093/nar/gkaa946 10.1186/s40168-019-0768-5	10.46936/10.25585/60000714
IMG_VR_0763	IMGVR_UViG_3300010885_000001|3300010885|Ga0133913_10004164|3399-36704	IMG_VR v3	Metagenome	3300010885	Integrated	33306	Clustered	IMG_VR_0457	NA	NA	NA	NA	NA	10.1093/nar/gkaa946 10.1186/s40168-019-0768-5	10.46936/10.25585/60000587
IMG_VR_0764	IMGVR_UViG_3300010885_000002|3300010885|Ga0133913_10005353	IMG_VR v3	Metagenome	3300010885	Linear	32998	Seed	IMG_VR_0764	Near-complete	ATPase MCP Penton PRO	Group 005	Large virophages	Maveriviricetes;Priklausovirales;Gulliviroviridae	10.1093/nar/gkaa946 10.1186/s40168-019-0768-5	10.46936/10.25585/60000587
IMG_VR_0765	IMGVR_UViG_3300010885_000003|3300010885|Ga0133913_10005368	IMG_VR v3	Metagenome	3300010885	Linear	32965	Seed	IMG_VR_0765	Near-complete	ATPase MCP Penton PRO	Group 005	Large virophages	Maveriviricetes;Priklausovirales;Gulliviroviridae	10.1093/nar/gkaa946 10.1186/s40168-019-0768-5	10.46936/10.25585/60000587
IMG_VR_0766	IMGVR_UViG_3300010885_000004|3300010885|Ga0133913_10005612	IMG_VR v3	Metagenome	3300010885	DTR	32223	Clustered	IMG_VR_0600	NA	NA	NA	NA	NA	10.1093/nar/gkaa946 10.1186/s40168-019-0768-5	10.46936/10.25585/60000587
IMG_VR_0767	IMGVR_UViG_3300010885_000005|3300010885|Ga0133913_10006257	IMG_VR v3	Metagenome	3300010885	Linear	30798	Seed	IMG_VR_0767	Near-complete	ATPase MCP Penton PRO	Group 003	Aquatic virophages 2	Maveriviricetes;Priklausovirales;Burtonviroviridae	10.1093/nar/gkaa946 10.1186/s40168-019-0768-5	10.46936/10.25585/60000587
IMG_VR_0768	IMGVR_UViG_3300010885_000006|3300010885|Ga0133913_10006437	IMG_VR v3	Metagenome	3300010885	Linear	30359	Seed	IMG_VR_0768	Near-complete	ATPase MCP Penton PRO	Group 004	SW01 virophages	Maveriviricetes;Priklausovirales;Dishuiviroviridae	10.1093/nar/gkaa946 10.1186/s40168-019-0768-5	10.46936/10.25585/60000587
IMG_VR_0769	IMGVR_UViG_3300010885_000007|3300010885|Ga0133913_10006691	IMG_VR v3	Metagenome	3300010885	Linear	29830	Seed	IMG_VR_0769	Near-complete	ATPase MCP Penton PRO	Group 005	Large virophages	Maveriviricetes;Priklausovirales;Gulliviroviridae	10.1093/nar/gkaa946 10.1186/s40168-019-0768-5	10.46936/10.25585/60000587
IMG_VR_0770	IMGVR_UViG_3300010885_000008|3300010885|Ga0133913_10007194	IMG_VR v3	Metagenome	3300010885	DTR	28790	Seed	IMG_VR_0770	Complete	ATPase MCP Penton PRO	Group 003	Aquatic virophages 2	Maveriviricetes;Priklausovirales;Burtonviroviridae	10.1093/nar/gkaa946 10.1186/s40168-019-0768-5	10.46936/10.25585/60000587
IMG_VR_0771	IMGVR_UViG_3300010885_000009|3300010885|Ga0133913_10007223	IMG_VR v3	Metagenome	3300010885	Linear	28852	Seed	IMG_VR_0771	Near-complete	ATPase MCP Penton PRO	Group 004	SW01 virophages	Maveriviricetes;Priklausovirales;Dishuiviroviridae	10.1093/nar/gkaa946 10.1186/s40168-019-0768-5	10.46936/10.25585/60000587
IMG_VR_0772	IMGVR_UViG_3300010885_000010|3300010885|Ga0133913_10007638	IMG_VR v3	Metagenome	3300010885	Linear	28093	Clustered	IMG_VR_1277	NA	NA	NA	NA	NA	10.1093/nar/gkaa946 10.1186/s40168-019-0768-5	10.46936/10.25585/60000587
IMG_VR_0773	IMGVR_UViG_3300010885_000011|3300010885|Ga0133913_10007866	IMG_VR v3	Metagenome	3300010885	Linear	27729	Seed	IMG_VR_0773	Near-complete	ATPase MCP Penton PRO	NA	NA	Maveriviricetes;Priklausovirales;Burtonviroviridae	10.1093/nar/gkaa946 10.1186/s40168-019-0768-5	10.46936/10.25585/60000587
IMG_VR_0774	IMGVR_UViG_3300010885_000012|3300010885|Ga0133913_10008183	IMG_VR v3	Metagenome	3300010885	DTR	27158	Seed	IMG_VR_0774	Complete	ATPase MCP Penton PRO	Group 003	Aquatic virophages 2	Maveriviricetes;Priklausovirales;Burtonviroviridae	10.1093/nar/gkaa946 10.1186/s40168-019-0768-5	10.46936/10.25585/60000587
IMG_VR_0775	IMGVR_UViG_3300010885_000013|3300010885|Ga0133913_10008278	IMG_VR v3	Metagenome	3300010885	Linear	27153	Seed	IMG_VR_0775	Near-complete	ATPase MCP Penton PRO	Group 004	SW01 virophages	Maveriviricetes;Priklausovirales;Dishuiviroviridae	10.1093/nar/gkaa946 10.1186/s40168-019-0768-5	10.46936/10.25585/60000587
IMG_VR_0776	IMGVR_UViG_3300010885_000014|3300010885|Ga0133913_10008287	IMG_VR v3	Metagenome	3300010885	Linear	27144	Seed	IMG_VR_0776	Near-complete	ATPase MCP Penton PRO	Group 001	Aquatic virophages 1	Maveriviricetes;Priklausovirales;Omnilimnoviroviridae	10.1093/nar/gkaa946 10.1186/s40168-019-0768-5	10.46936/10.25585/60000587
IMG_VR_0777	IMGVR_UViG_3300010885_000015|3300010885|Ga0133913_10008343	IMG_VR v3	Metagenome	3300010885	Linear	27067	Clustered	IMG_VR_0603	NA	NA	NA	NA	NA	10.1093/nar/gkaa946 10.1186/s40168-019-0768-5	10.46936/10.25585/60000587
IMG_VR_0778	IMGVR_UViG_3300010885_000016|3300010885|Ga0133913_10008424	IMG_VR v3	Metagenome	3300010885	DTR	26814	Seed	IMG_VR_0778	Complete	ATPase MCP Penton PRO	Group 003	Aquatic virophages 2	Maveriviricetes;Priklausovirales;Burtonviroviridae	10.1093/nar/gkaa946 10.1186/s40168-019-0768-5	10.46936/10.25585/60000587
IMG_VR_0779	IMGVR_UViG_3300010885_000017|3300010885|Ga0133913_10008451	IMG_VR v3	Metagenome	3300010885	Linear	26908	Clustered	IMG_VR_1254	NA	NA	NA	NA	NA	10.1093/nar/gkaa946 10.1186/s40168-019-0768-5	10.46936/10.25585/60000587
IMG_VR_0780	IMGVR_UViG_3300010885_000018|3300010885|Ga0133913_10008468	IMG_VR v3	Metagenome	3300010885	Linear	26886	Clustered	IMG_VR_1289	NA	NA	NA	NA	NA	10.1093/nar/gkaa946 10.1186/s40168-019-0768-5	10.46936/10.25585/60000587
IMG_VR_0781	IMGVR_UViG_3300010885_000019|3300010885|Ga0133913_10008574	IMG_VR v3	Metagenome	3300010885	Linear	26715	Seed	IMG_VR_0781	Near-complete	ATPase MCP Penton PRO	Group 004	SW01 virophages	Maveriviricetes;Priklausovirales;Dishuiviroviridae	10.1093/nar/gkaa946 10.1186/s40168-019-0768-5	10.46936/10.25585/60000587
IMG_VR_0782	IMGVR_UViG_3300010885_000020|3300010885|Ga0133913_10008597	IMG_VR v3	Metagenome	3300010885	DTR	26553	Clustered	IMG_VR_0464	NA	NA	NA	NA	NA	10.1093/nar/gkaa946 10.1186/s40168-019-0768-5	10.46936/10.25585/60000587
IMG_VR_0783	IMGVR_UViG_3300010885_000021|3300010885|Ga0133913_10008686	IMG_VR v3	Metagenome	3300010885	Linear	26540	Seed	IMG_VR_0783	Near-complete	ATPase MCP Penton PRO	NA	NA	Maveriviricetes;Unclassified	10.1093/nar/gkaa946 10.1186/s40168-019-0768-5	10.46936/10.25585/60000587
IMG_VR_0784	IMGVR_UViG_3300010885_000022|3300010885|Ga0133913_10008696	IMG_VR v3	Metagenome	3300010885	Linear	26532	Seed	IMG_VR_0784	Near-complete	ATPase MCP Penton PRO	NA	NA	Maveriviricetes;Priklausovirales;Burtonviroviridae	10.1093/nar/gkaa946 10.1186/s40168-019-0768-5	10.46936/10.25585/60000587
IMG_VR_0785	IMGVR_UViG_3300010885_000023|3300010885|Ga0133913_10008705	IMG_VR v3	Metagenome	3300010885	DTR	26401	Clustered	IMG_VR_0609	NA	NA	NA	NA	NA	10.1093/nar/gkaa946 10.1186/s40168-019-0768-5	10.46936/10.25585/60000587
IMG_VR_0786	IMGVR_UViG_3300010885_000024|3300010885|Ga0133913_10008723	IMG_VR v3	Metagenome	3300010885	Linear	26505	Clustered	IMG_VR_0440	NA	NA	NA	NA	NA	10.1093/nar/gkaa946 10.1186/s40168-019-0768-5	10.46936/10.25585/60000587
IMG_VR_0787	IMGVR_UViG_3300010885_000025|3300010885|Ga0133913_10008891	IMG_VR v3	Metagenome	3300010885	Linear	26282	Clustered	IMG_VR_1276	NA	NA	NA	NA	NA	10.1093/nar/gkaa946 10.1186/s40168-019-0768-5	10.46936/10.25585/60000587
IMG_VR_0788	IMGVR_UViG_3300010885_000026|3300010885|Ga0133913_10009135	IMG_VR v3	Metagenome	3300010885	DTR	25981	Seed	IMG_VR_0788	Complete	ATPase MCP Penton PRO	Group 004	SW01 virophages	Maveriviricetes;Priklausovirales;Dishuiviroviridae	10.1093/nar/gkaa946 10.1186/s40168-019-0768-5	10.46936/10.25585/60000587
IMG_VR_0789	IMGVR_UViG_3300010885_000027|3300010885|Ga0133913_10009174	IMG_VR v3	Metagenome	3300010885	Linear	25952	Seed	IMG_VR_0789	Near-complete	ATPase MCP Penton PRO	Group 003	Aquatic virophages 2	Maveriviricetes;Priklausovirales;Burtonviroviridae	10.1093/nar/gkaa946 10.1186/s40168-019-0768-5	10.46936/10.25585/60000587
IMG_VR_0790	IMGVR_UViG_3300010885_000028|3300010885|Ga0133913_10009524	IMG_VR v3	Metagenome	3300010885	Linear	25466	Seed	IMG_VR_0790	Near-complete	ATPase MCP Penton PRO	Group 003	Aquatic virophages 2	Maveriviricetes;Priklausovirales;Burtonviroviridae	10.1093/nar/gkaa946 10.1186/s40168-019-0768-5	10.46936/10.25585/60000587
IMG_VR_0791	IMGVR_UViG_3300010885_000029|3300010885|Ga0133913_10009525	IMG_VR v3	Metagenome	3300010885	Linear	25466	Clustered	IMG_VR_0534	NA	NA	NA	NA	NA	10.1093/nar/gkaa946 10.1186/s40168-019-0768-5	10.46936/10.25585/60000587
IMG_VR_0792	IMGVR_UViG_3300010885_000030|3300010885|Ga0133913_10009566	IMG_VR v3	Metagenome	3300010885	DTR	25293	Seed	IMG_VR_0792	Complete	ATPase MCP Penton PRO	Group 001	Aquatic virophages 1	Maveriviricetes;Priklausovirales;Omnilimnoviroviridae	10.1093/nar/gkaa946 10.1186/s40168-019-0768-5	10.46936/10.25585/60000587
IMG_VR_0793	IMGVR_UViG_3300010885_000031|3300010885|Ga0133913_10009803	IMG_VR v3	Metagenome	3300010885	Linear	25152	Clustered	IMG_VR_1340	NA	NA	NA	NA	NA	10.1093/nar/gkaa946 10.1186/s40168-019-0768-5	10.46936/10.25585/60000587
IMG_VR_0794	IMGVR_UViG_3300010885_000032|3300010885|Ga0133913_10009934	IMG_VR v3	Metagenome	3300010885	DTR	24854	Seed	IMG_VR_0794	Complete	ATPase MCP Penton PRO	Group 001	Aquatic virophages 1	Maveriviricetes;Priklausovirales;Omnilimnoviroviridae	10.1093/nar/gkaa946 10.1186/s40168-019-0768-5	10.46936/10.25585/60000587
IMG_VR_0795	IMGVR_UViG_3300010885_000033|3300010885|Ga0133913_10010149	IMG_VR v3	Metagenome	3300010885	Linear	24731	Seed	IMG_VR_0795	Near-complete	ATPase MCP Penton PRO	Group 001	Aquatic virophages 1	Maveriviricetes;Priklausovirales;Omnilimnoviroviridae	10.1093/nar/gkaa946 10.1186/s40168-019-0768-5	10.46936/10.25585/60000587
IMG_VR_0796	IMGVR_UViG_3300010885_000034|3300010885|Ga0133913_10010390	IMG_VR v3	Metagenome	3300010885	DTR	24328	Clustered	IMG_VR_0501	NA	NA	NA	NA	NA	10.1093/nar/gkaa946 10.1186/s40168-019-0768-5	10.46936/10.25585/60000587
IMG_VR_0797	IMGVR_UViG_3300010885_000035|3300010885|Ga0133913_10010443	IMG_VR v3	Metagenome	3300010885	DTR	24263	Seed	IMG_VR_0797	Complete	ATPase MCP Penton PRO	Group 004	SW01 virophages	Maveriviricetes;Priklausovirales;Dishuiviroviridae	10.1093/nar/gkaa946 10.1186/s40168-019-0768-5	10.46936/10.25585/60000587
IMG_VR_0798	IMGVR_UViG_3300010885_000036|3300010885|Ga0133913_10010890	IMG_VR v3	Metagenome	3300010885	Linear	23948	Seed	IMG_VR_0798	Partial	ATPase MCP Penton PRO	NA	NA	Maveriviricetes;Priklausovirales;Omnilimnoviroviridae	10.1093/nar/gkaa946 10.1186/s40168-019-0768-5	10.46936/10.25585/60000587
IMG_VR_0799	IMGVR_UViG_3300010885_000037|3300010885|Ga0133913_10011015	IMG_VR v3	Metagenome	3300010885	DTR	23698	Seed	IMG_VR_0799	Complete	ATPase MCP Penton PRO	Group 003	Aquatic virophages 2	Maveriviricetes;Priklausovirales;Burtonviroviridae	10.1093/nar/gkaa946 10.1186/s40168-019-0768-5	10.46936/10.25585/60000587
IMG_VR_0800	IMGVR_UViG_3300010885_000038|3300010885|Ga0133913_10011061	IMG_VR v3	Metagenome	3300010885	DTR	23658	Seed	IMG_VR_0800	Complete	ATPase MCP Penton PRO	Group 004	NA	Maveriviricetes;Unclassified	10.1093/nar/gkaa946 10.1186/s40168-019-0768-5	10.46936/10.25585/60000587
IMG_VR_0801	IMGVR_UViG_3300010885_000039|3300010885|Ga0133913_10011382	IMG_VR v3	Metagenome	3300010885	DTR	23413	Clustered	PE_249	NA	NA	NA	NA	NA	10.1093/nar/gkaa946 10.1186/s40168-019-0768-5	10.46936/10.25585/60000587
IMG_VR_0802	IMGVR_UViG_3300010885_000040|3300010885|Ga0133913_10011474	IMG_VR v3	Metagenome	3300010885	Linear	23382	Seed	IMG_VR_0802	Partial	ATPase MCP Penton PRO	NA	NA	Maveriviricetes;Priklausovirales;Burtonviroviridae	10.1093/nar/gkaa946 10.1186/s40168-019-0768-5	10.46936/10.25585/60000587
IMG_VR_0803	IMGVR_UViG_3300010885_000041|3300010885|Ga0133913_10011707	IMG_VR v3	Metagenome	3300010885	Linear	23141	Seed	IMG_VR_0803	Partial	MCP Penton PRO	NA	NA	Maveriviricetes;Priklausovirales;Gulliviroviridae	10.1093/nar/gkaa946 10.1186/s40168-019-0768-5	10.46936/10.25585/60000587
IMG_VR_0804	IMGVR_UViG_3300010885_000042|3300010885|Ga0133913_10011865	IMG_VR v3	Metagenome	3300010885	Linear	22981	Seed	IMG_VR_0804	Partial	ATPase MCP Penton PRO	NA	NA	Maveriviricetes;Unclassified	10.1093/nar/gkaa946 10.1186/s40168-019-0768-5	10.46936/10.25585/60000587
IMG_VR_0805	IMGVR_UViG_3300010885_000043|3300010885|Ga0133913_10012051	IMG_VR v3	Metagenome	3300010885	Linear	22820	Clustered	IMG_VR_0441	NA	NA	NA	NA	NA	10.1093/nar/gkaa946 10.1186/s40168-019-0768-5	10.46936/10.25585/60000587
IMG_VR_0806	IMGVR_UViG_3300010885_000044|3300010885|Ga0133913_10012200	IMG_VR v3	Metagenome	3300010885	DTR	22567	Clustered	IMG_VR_0605	NA	NA	NA	NA	NA	10.1093/nar/gkaa946 10.1186/s40168-019-0768-5	10.46936/10.25585/60000587
IMG_VR_0807	IMGVR_UViG_3300010885_000045|3300010885|Ga0133913_10012254	IMG_VR v3	Metagenome	3300010885	Linear	22645	Clustered	IMG_VR_0684	NA	NA	NA	NA	NA	10.1093/nar/gkaa946 10.1186/s40168-019-0768-5	10.46936/10.25585/60000587
IMG_VR_0808	IMGVR_UViG_3300010885_000046|3300010885|Ga0133913_10012256	IMG_VR v3	Metagenome	3300010885	DTR	22519	Seed	IMG_VR_0808	Complete	ATPase MCP Penton PRO	Group 003	Aquatic virophages 2	Maveriviricetes;Priklausovirales;Burtonviroviridae	10.1093/nar/gkaa946 10.1186/s40168-019-0768-5	10.46936/10.25585/60000587
IMG_VR_0809	IMGVR_UViG_3300010885_000047|3300010885|Ga0133913_10012518	IMG_VR v3	Metagenome	3300010885	Linear	22395	Seed	IMG_VR_0809	Partial	ATPase MCP Penton PRO	NA	NA	Maveriviricetes;Priklausovirales;Burtonviroviridae	10.1093/nar/gkaa946 10.1186/s40168-019-0768-5	10.46936/10.25585/60000587
IMG_VR_0810	IMGVR_UViG_3300010885_000048|3300010885|Ga0133913_10012712	IMG_VR v3	Metagenome	3300010885	DTR	22098	Seed	IMG_VR_0810	Complete	ATPase MCP Penton PRO	NA	NA	Maveriviricetes;Unclassified	10.1093/nar/gkaa946 10.1186/s40168-019-0768-5	10.46936/10.25585/60000587
IMG_VR_0811	IMGVR_UViG_3300010885_000049|3300010885|Ga0133913_10013028	IMG_VR v3	Metagenome	3300010885	Linear	21969	Seed	IMG_VR_0811	Partial	ATPase MCP Penton PRO	NA	NA	Maveriviricetes;Priklausovirales;Burtonviroviridae	10.1093/nar/gkaa946 10.1186/s40168-019-0768-5	10.46936/10.25585/60000587
IMG_VR_0812	IMGVR_UViG_3300010885_000051|3300010885|Ga0133913_10013167	IMG_VR v3	Metagenome	3300010885	DTR	21733	Seed	IMG_VR_0812	Complete	ATPase MCP Penton PRO	Group 001	Aquatic virophages 1	Maveriviricetes;Priklausovirales;Omnilimnoviroviridae	10.1093/nar/gkaa946 10.1186/s40168-019-0768-5	10.46936/10.25585/60000587
IMG_VR_0813	IMGVR_UViG_3300010885_000052|3300010885|Ga0133913_10013256	IMG_VR v3	Metagenome	3300010885	DTR	21662	Seed	IMG_VR_0813	Complete	ATPase MCP Penton PRO	Group 002	Sputnik virophages	Maveriviricetes;Mividavirales;Sputniviroviridae	10.1093/nar/gkaa946 10.1186/s40168-019-0768-5	10.46936/10.25585/60000587
IMG_VR_0814	IMGVR_UViG_3300010885_000053|3300010885|Ga0133913_10013406	IMG_VR v3	Metagenome	3300010885	Linear	21661	Seed	IMG_VR_0814	Partial	ATPase MCP Penton PRO	NA	NA	Maveriviricetes;Unclassified	10.1093/nar/gkaa946 10.1186/s40168-019-0768-5	10.46936/10.25585/60000587
IMG_VR_0815	IMGVR_UViG_3300010885_000054|3300010885|Ga0133913_10013708	IMG_VR v3	Metagenome	3300010885	DTR	21314	Clustered	IMG_VR_0587	NA	NA	NA	NA	NA	10.1093/nar/gkaa946 10.1186/s40168-019-0768-5	10.46936/10.25585/60000587
IMG_VR_0816	IMGVR_UViG_3300010885_000055|3300010885|Ga0133913_10014576	IMG_VR v3	Metagenome	3300010885	Linear	20839	Seed	IMG_VR_0816	Partial	ATPase MCP Penton PRO	NA	NA	Maveriviricetes;Priklausovirales;Omnilimnoviroviridae	10.1093/nar/gkaa946 10.1186/s40168-019-0768-5	10.46936/10.25585/60000587
IMG_VR_0817	IMGVR_UViG_3300010885_000056|3300010885|Ga0133913_10014609	IMG_VR v3	Metagenome	3300010885	Linear	20815	Clustered	IMG_VR_0585	NA	NA	NA	NA	NA	10.1093/nar/gkaa946 10.1186/s40168-019-0768-5	10.46936/10.25585/60000587
IMG_VR_0818	IMGVR_UViG_3300010885_000057|3300010885|Ga0133913_10014971	IMG_VR v3	Metagenome	3300010885	Linear	20578	Seed	IMG_VR_0818	Partial	ATPase MCP Penton	NA	NA	Maveriviricetes;Priklausovirales;Omnilimnoviroviridae	10.1093/nar/gkaa946 10.1186/s40168-019-0768-5	10.46936/10.25585/60000587
IMG_VR_0819	IMGVR_UViG_3300010885_000058|3300010885|Ga0133913_10015321	IMG_VR v3	Metagenome	3300010885	Linear	20349	Clustered	IMG_VR_0685	NA	NA	NA	NA	NA	10.1093/nar/gkaa946 10.1186/s40168-019-0768-5	10.46936/10.25585/60000587
IMG_VR_0820	IMGVR_UViG_3300010885_000059|3300010885|Ga0133913_10015411	IMG_VR v3	Metagenome	3300010885	DTR	20182	Seed	IMG_VR_0820	Complete	ATPase MCP Penton PRO	Group 001	Aquatic virophages 1	Maveriviricetes;Priklausovirales;Omnilimnoviroviridae	10.1093/nar/gkaa946 10.1186/s40168-019-0768-5	10.46936/10.25585/60000587
IMG_VR_0821	IMGVR_UViG_3300010885_000060|3300010885|Ga0133913_10016225	IMG_VR v3	Metagenome	3300010885	Linear	19797	Seed	IMG_VR_0821	Partial	ATPase MCP Penton PRO	NA	NA	Maveriviricetes;Priklausovirales;Dishuiviroviridae	10.1093/nar/gkaa946 10.1186/s40168-019-0768-5	10.46936/10.25585/60000587
IMG_VR_0822	IMGVR_UViG_3300010885_000061|3300010885|Ga0133913_10016429	IMG_VR v3	Metagenome	3300010885	Linear	19671	Seed	IMG_VR_0822	Partial	ATPase MCP Penton PRO	NA	NA	Maveriviricetes;Unclassified	10.1093/nar/gkaa946 10.1186/s40168-019-0768-5	10.46936/10.25585/60000587
IMG_VR_0823	IMGVR_UViG_3300010885_000062|3300010885|Ga0133913_10016501	IMG_VR v3	Metagenome	3300010885	Linear	19625	Seed	IMG_VR_0823	Partial	ATPase MCP Penton PRO	NA	NA	Maveriviricetes;Priklausovirales;Burtonviroviridae	10.1093/nar/gkaa946 10.1186/s40168-019-0768-5	10.46936/10.25585/60000587
IMG_VR_0824	IMGVR_UViG_3300010885_000063|3300010885|Ga0133913_10017077	IMG_VR v3	Metagenome	3300010885	DTR	19181	Seed	IMG_VR_0824	Complete	ATPase MCP Penton PRO	Group 003	Aquatic virophages 2	Maveriviricetes;Priklausovirales;Burtonviroviridae	10.1093/nar/gkaa946 10.1186/s40168-019-0768-5	10.46936/10.25585/60000587
IMG_VR_0825	IMGVR_UViG_3300010885_000065|3300010885|Ga0133913_10017706	IMG_VR v3	Metagenome	3300010885	Linear	18970	Clustered	IMG_VR_0680	NA	NA	NA	NA	NA	10.1093/nar/gkaa946 10.1186/s40168-019-0768-5	10.46936/10.25585/60000587
IMG_VR_0826	IMGVR_UViG_3300010885_000066|3300010885|Ga0133913_10017880	IMG_VR v3	Metagenome	3300010885	DTR	18860	Clustered	IMG_VR_0470	NA	NA	NA	NA	NA	10.1093/nar/gkaa946 10.1186/s40168-019-0768-5	10.46936/10.25585/60000587
IMG_VR_0827	IMGVR_UViG_3300010885_000068|3300010885|Ga0133913_10019370	IMG_VR v3	Metagenome	3300010885	Linear	18136	Seed	IMG_VR_0827	Partial	ATPase MCP Penton PRO	NA	NA	Maveriviricetes;Priklausovirales;Burtonviroviridae	10.1093/nar/gkaa946 10.1186/s40168-019-0768-5	10.46936/10.25585/60000587
IMG_VR_0828	IMGVR_UViG_3300010885_000069|3300010885|Ga0133913_10019400	IMG_VR v3	Metagenome	3300010885	Linear	18126	Clustered	IMG_VR_0659	NA	NA	NA	NA	NA	10.1093/nar/gkaa946 10.1186/s40168-019-0768-5	10.46936/10.25585/60000587
IMG_VR_0829	IMGVR_UViG_3300010885_000070|3300010885|Ga0133913_10019951	IMG_VR v3	Metagenome	3300010885	Linear	17871	Clustered	IMG_VR_0688	NA	NA	NA	NA	NA	10.1093/nar/gkaa946 10.1186/s40168-019-0768-5	10.46936/10.25585/60000587
IMG_VR_0830	IMGVR_UViG_3300010885_000071|3300010885|Ga0133913_10020643	IMG_VR v3	Metagenome	3300010885	Linear	17575	Seed	IMG_VR_0830	Partial	ATPase MCP Penton PRO	NA	NA	Maveriviricetes;Unclassified	10.1093/nar/gkaa946 10.1186/s40168-019-0768-5	10.46936/10.25585/60000587
IMG_VR_0831	IMGVR_UViG_3300010885_000072|3300010885|Ga0133913_10021350	IMG_VR v3	Metagenome	3300010885	Linear	17293	Clustered	IMG_VR_1144	NA	NA	NA	NA	NA	10.1093/nar/gkaa946 10.1186/s40168-019-0768-5	10.46936/10.25585/60000587
IMG_VR_0832	IMGVR_UViG_3300010885_000073|3300010885|Ga0133913_10023013	IMG_VR v3	Metagenome	3300010885	Linear	16650	Clustered	IMG_VR_0566	NA	NA	NA	NA	NA	10.1093/nar/gkaa946 10.1186/s40168-019-0768-5	10.46936/10.25585/60000587
IMG_VR_0833	IMGVR_UViG_3300010885_000074|3300010885|Ga0133913_10023783	IMG_VR v3	Metagenome	3300010885	Linear	16393	Seed	IMG_VR_0833	Partial	ATPase MCP Penton PRO	NA	NA	Maveriviricetes;Priklausovirales;Burtonviroviridae	10.1093/nar/gkaa946 10.1186/s40168-019-0768-5	10.46936/10.25585/60000587
IMG_VR_0834	IMGVR_UViG_3300010885_000076|3300010885|Ga0133913_10024645	IMG_VR v3	Metagenome	3300010885	Linear	16114	Seed	IMG_VR_0834	Partial	ATPase MCP Penton	NA	NA	Maveriviricetes;Priklausovirales;Dishuiviroviridae	10.1093/nar/gkaa946 10.1186/s40168-019-0768-5	10.46936/10.25585/60000587
IMG_VR_0835	IMGVR_UViG_3300010885_000077|3300010885|Ga0133913_10025220	IMG_VR v3	Metagenome	3300010885	Linear	15931	Seed	IMG_VR_0835	Partial	ATPase MCP Penton PRO	NA	NA	Maveriviricetes;Priklausovirales;Burtonviroviridae	10.1093/nar/gkaa946 10.1186/s40168-019-0768-5	10.46936/10.25585/60000587
IMG_VR_0836	IMGVR_UViG_3300010885_000079|3300010885|Ga0133913_10025508	IMG_VR v3	Metagenome	3300010885	Linear	15838	Seed	IMG_VR_0836	Partial	ATPase MCP Penton	NA	NA	Maveriviricetes;Priklausovirales;Dishuiviroviridae	10.1093/nar/gkaa946 10.1186/s40168-019-0768-5	10.46936/10.25585/60000587
IMG_VR_0837	IMGVR_UViG_3300010885_000080|3300010885|Ga0133913_10025975	IMG_VR v3	Metagenome	3300010885	Linear	15690	Clustered	IMG_VR_0563	NA	NA	NA	NA	NA	10.1093/nar/gkaa946 10.1186/s40168-019-0768-5	10.46936/10.25585/60000587
IMG_VR_0838	IMGVR_UViG_3300010885_000081|3300010885|Ga0133913_10026199	IMG_VR v3	Metagenome	3300010885	Linear	15618	Seed	IMG_VR_0838	Partial	MCP Penton PRO	NA	NA	Maveriviricetes;Priklausovirales;Omnilimnoviroviridae	10.1093/nar/gkaa946 10.1186/s40168-019-0768-5	10.46936/10.25585/60000587
IMG_VR_0839	IMGVR_UViG_3300010885_000082|3300010885|Ga0133913_10026942	IMG_VR v3	Metagenome	3300010885	Linear	15394	Seed	IMG_VR_0839	Partial	ATPase MCP Penton	NA	NA	Maveriviricetes;Priklausovirales;Omnilimnoviroviridae	10.1093/nar/gkaa946 10.1186/s40168-019-0768-5	10.46936/10.25585/60000587
IMG_VR_0840	IMGVR_UViG_3300010885_000083|3300010885|Ga0133913_10027333	IMG_VR v3	Metagenome	3300010885	Linear	15281	Seed	IMG_VR_0840	Partial	MCP Penton PRO	NA	NA	Maveriviricetes;Priklausovirales;Burtonviroviridae	10.1093/nar/gkaa946 10.1186/s40168-019-0768-5	10.46936/10.25585/60000587
IMG_VR_0841	IMGVR_UViG_3300010885_000084|3300010885|Ga0133913_10027335	IMG_VR v3	Metagenome	3300010885	DTR	15158	Seed	IMG_VR_0841	Complete	ATPase MCP Penton PRO	NA	NA	Maveriviricetes;Unclassified	10.1093/nar/gkaa946 10.1186/s40168-019-0768-5	10.46936/10.25585/60000587
IMG_VR_0842	IMGVR_UViG_3300010885_000085|3300010885|Ga0133913_10028243	IMG_VR v3	Metagenome	3300010885	Linear	15035	Seed	IMG_VR_0842	Partial	MCP Penton PRO	NA	NA	Maveriviricetes;Priklausovirales;Omnilimnoviroviridae	10.1093/nar/gkaa946 10.1186/s40168-019-0768-5	10.46936/10.25585/60000587
IMG_VR_0843	IMGVR_UViG_3300010885_000086|3300010885|Ga0133913_10028904	IMG_VR v3	Metagenome	3300010885	Linear	14862	Seed	IMG_VR_0843	Partial	ATPase MCP Penton PRO	NA	NA	Maveriviricetes;Unclassified	10.1093/nar/gkaa946 10.1186/s40168-019-0768-5	10.46936/10.25585/60000587
IMG_VR_0844	IMGVR_UViG_3300010885_000088|3300010885|Ga0133913_10029435	IMG_VR v3	Metagenome	3300010885	Linear	14731	Seed	IMG_VR_0844	Partial	ATPase MCP Penton PRO	NA	NA	Maveriviricetes;Unclassified	10.1093/nar/gkaa946 10.1186/s40168-019-0768-5	10.46936/10.25585/60000587
IMG_VR_0845	IMGVR_UViG_3300010885_000089|3300010885|Ga0133913_10030603	IMG_VR v3	Metagenome	3300010885	Linear	14454	Seed	IMG_VR_0845	Partial	MCP Penton PRO	NA	NA	Maveriviricetes;Priklausovirales;Gulliviroviridae	10.1093/nar/gkaa946 10.1186/s40168-019-0768-5	10.46936/10.25585/60000587
IMG_VR_0846	IMGVR_UViG_3300010885_000090|3300010885|Ga0133913_10030734	IMG_VR v3	Metagenome	3300010885	Linear	14428	Clustered	IMG_VR_0611	NA	NA	NA	NA	NA	10.1093/nar/gkaa946 10.1186/s40168-019-0768-5	10.46936/10.25585/60000587
IMG_VR_0847	IMGVR_UViG_3300010885_000091|3300010885|Ga0133913_10030843	IMG_VR v3	Metagenome	3300010885	Linear	14402	Seed	IMG_VR_0847	Partial	MCP Penton PRO	NA	NA	Maveriviricetes;Priklausovirales;Burtonviroviridae	10.1093/nar/gkaa946 10.1186/s40168-019-0768-5	10.46936/10.25585/60000587
IMG_VR_0848	IMGVR_UViG_3300010885_000092|3300010885|Ga0133913_10031394	IMG_VR v3	Metagenome	3300010885	Linear	14263	Seed	IMG_VR_0848	Partial	ATPase MCP Penton PRO	NA	NA	Maveriviricetes;Priklausovirales;Burtonviroviridae	10.1093/nar/gkaa946 10.1186/s40168-019-0768-5	10.46936/10.25585/60000587
IMG_VR_0849	IMGVR_UViG_3300010885_000093|3300010885|Ga0133913_10031436	IMG_VR v3	Metagenome	3300010885	Linear	14253	Seed	IMG_VR_0849	Partial	MCP Penton PRO	NA	NA	Maveriviricetes;Priklausovirales;Burtonviroviridae	10.1093/nar/gkaa946 10.1186/s40168-019-0768-5	10.46936/10.25585/60000587
IMG_VR_0850	IMGVR_UViG_3300010885_000094|3300010885|Ga0133913_10031625	IMG_VR v3	Metagenome	3300010885	Linear	14205	Clustered	IMG_VR_0742	NA	NA	NA	NA	NA	10.1093/nar/gkaa946 10.1186/s40168-019-0768-5	10.46936/10.25585/60000587
IMG_VR_0851	IMGVR_UViG_3300010885_000095|3300010885|Ga0133913_10032404	IMG_VR v3	Metagenome	3300010885	Linear	14043	Seed	IMG_VR_0851	Partial	ATPase MCP Penton PRO	NA	NA	Maveriviricetes;Unclassified	10.1093/nar/gkaa946 10.1186/s40168-019-0768-5	10.46936/10.25585/60000587
IMG_VR_0852	IMGVR_UViG_3300010885_000096|3300010885|Ga0133913_10032494	IMG_VR v3	Metagenome	3300010885	Linear	14021	Clustered	IMG_VR_1301	NA	NA	NA	NA	NA	10.1093/nar/gkaa946 10.1186/s40168-019-0768-5	10.46936/10.25585/60000587
IMG_VR_0853	IMGVR_UViG_3300010885_000097|3300010885|Ga0133913_10032612	IMG_VR v3	Metagenome	3300010885	Linear	13994	Seed	IMG_VR_0853	Partial	MCP Penton PRO	NA	NA	Maveriviricetes;Priklausovirales;Burtonviroviridae	10.1093/nar/gkaa946 10.1186/s40168-019-0768-5	10.46936/10.25585/60000587
IMG_VR_0854	IMGVR_UViG_3300010885_000098|3300010885|Ga0133913_10032769	IMG_VR v3	Metagenome	3300010885	Linear	13957	Seed	IMG_VR_0854	Partial	MCP Penton PRO	NA	NA	Maveriviricetes;Priklausovirales;Burtonviroviridae	10.1093/nar/gkaa946 10.1186/s40168-019-0768-5	10.46936/10.25585/60000587
IMG_VR_0855	IMGVR_UViG_3300010885_000099|3300010885|Ga0133913_10032810	IMG_VR v3	Metagenome	3300010885	Linear	13950	Seed	IMG_VR_0855	Partial	MCP Penton PRO	NA	NA	Maveriviricetes;Priklausovirales;Omnilimnoviroviridae	10.1093/nar/gkaa946 10.1186/s40168-019-0768-5	10.46936/10.25585/60000587
IMG_VR_0856	IMGVR_UViG_3300010885_000100|3300010885|Ga0133913_10032857	IMG_VR v3	Metagenome	3300010885	Linear	13940	Clustered	IMG_VR_0551	NA	NA	NA	NA	NA	10.1093/nar/gkaa946 10.1186/s40168-019-0768-5	10.46936/10.25585/60000587
IMG_VR_0857	IMGVR_UViG_3300010885_000101|3300010885|Ga0133913_10033257	IMG_VR v3	Metagenome	3300010885	Linear	13850	Seed	IMG_VR_0857	Partial	MCP Penton PRO	NA	NA	Maveriviricetes;Priklausovirales;Omnilimnoviroviridae	10.1093/nar/gkaa946 10.1186/s40168-019-0768-5	10.46936/10.25585/60000587
IMG_VR_0858	IMGVR_UViG_3300010885_000102|3300010885|Ga0133913_10034462	IMG_VR v3	Metagenome	3300010885	Linear	13600	Seed	IMG_VR_0858	Partial	ATPase MCP Penton PRO	NA	NA	Maveriviricetes;Unclassified	10.1093/nar/gkaa946 10.1186/s40168-019-0768-5	10.46936/10.25585/60000587
IMG_VR_0859	IMGVR_UViG_3300010885_000103|3300010885|Ga0133913_10034807	IMG_VR v3	Metagenome	3300010885	Linear	13523	Seed	IMG_VR_0859	Partial	ATPase MCP Penton	NA	NA	Maveriviricetes;Priklausovirales;Omnilimnoviroviridae	10.1093/nar/gkaa946 10.1186/s40168-019-0768-5	10.46936/10.25585/60000587
IMG_VR_0860	IMGVR_UViG_3300010885_000104|3300010885|Ga0133913_10035021	IMG_VR v3	Metagenome	3300010885	Linear	13478	Clustered	IMG_VR_1365	NA	NA	NA	NA	NA	10.1093/nar/gkaa946 10.1186/s40168-019-0768-5	10.46936/10.25585/60000587
IMG_VR_0861	IMGVR_UViG_3300010885_000105|3300010885|Ga0133913_10035946	IMG_VR v3	Metagenome	3300010885	Linear	13289	Clustered	IMG_VR_0560	NA	NA	NA	NA	NA	10.1093/nar/gkaa946 10.1186/s40168-019-0768-5	10.46936/10.25585/60000587
IMG_VR_0862	IMGVR_UViG_3300010885_000106|3300010885|Ga0133913_10036779	IMG_VR v3	Metagenome	3300010885	Linear	13132	Clustered	IMG_VR_0544	NA	NA	NA	NA	NA	10.1093/nar/gkaa946 10.1186/s40168-019-0768-5	10.46936/10.25585/60000587
IMG_VR_0863	IMGVR_UViG_3300010885_000107|3300010885|Ga0133913_10036964	IMG_VR v3	Metagenome	3300010885	Linear	13101	Seed	IMG_VR_0863	Partial	ATPase MCP Penton PRO	NA	NA	Maveriviricetes;Priklausovirales;Dishuiviroviridae	10.1093/nar/gkaa946 10.1186/s40168-019-0768-5	10.46936/10.25585/60000587
IMG_VR_0864	IMGVR_UViG_3300010885_000108|3300010885|Ga0133913_10037881	IMG_VR v3	Metagenome	3300010885	Linear	12934	Seed	IMG_VR_0864	Partial	MCP Penton PRO	NA	NA	Maveriviricetes;Priklausovirales;Burtonviroviridae	10.1093/nar/gkaa946 10.1186/s40168-019-0768-5	10.46936/10.25585/60000587
IMG_VR_0865	IMGVR_UViG_3300010885_000109|3300010885|Ga0133913_10038945	IMG_VR v3	Metagenome	3300010885	Linear	12761	Clustered	IMG_VR_1304	NA	NA	NA	NA	NA	10.1093/nar/gkaa946 10.1186/s40168-019-0768-5	10.46936/10.25585/60000587
IMG_VR_0866	IMGVR_UViG_3300010885_000110|3300010885|Ga0133913_10039029	IMG_VR v3	Metagenome	3300010885	Linear	12748	Seed	IMG_VR_0866	Partial	ATPase MCP Penton PRO	NA	NA	Maveriviricetes;Unclassified	10.1093/nar/gkaa946 10.1186/s40168-019-0768-5	10.46936/10.25585/60000587
IMG_VR_0867	IMGVR_UViG_3300010885_000111|3300010885|Ga0133913_10039131	IMG_VR v3	Metagenome	3300010885	Linear	12730	Clustered	IMG_VR_0660	NA	NA	NA	NA	NA	10.1093/nar/gkaa946 10.1186/s40168-019-0768-5	10.46936/10.25585/60000587
IMG_VR_0868	IMGVR_UViG_3300010885_000112|3300010885|Ga0133913_10039588	IMG_VR v3	Metagenome	3300010885	Linear	12658	Seed	IMG_VR_0868	Partial	ATPase MCP Penton PRO	NA	NA	Maveriviricetes;Priklausovirales;Burtonviroviridae	10.1093/nar/gkaa946 10.1186/s40168-019-0768-5	10.46936/10.25585/60000587
IMG_VR_0869	IMGVR_UViG_3300010885_000113|3300010885|Ga0133913_10040121	IMG_VR v3	Metagenome	3300010885	Linear	12578	Seed	IMG_VR_0869	Partial	ATPase MCP Penton	NA	NA	Maveriviricetes;Priklausovirales;Gulliviroviridae	10.1093/nar/gkaa946 10.1186/s40168-019-0768-5	10.46936/10.25585/60000587
IMG_VR_0870	IMGVR_UViG_3300010885_000114|3300010885|Ga0133913_10040382	IMG_VR v3	Metagenome	3300010885	Linear	12537	Seed	IMG_VR_0870	Partial	ATPase MCP Penton PRO	NA	NA	Maveriviricetes;Unclassified	10.1093/nar/gkaa946 10.1186/s40168-019-0768-5	10.46936/10.25585/60000587
IMG_VR_0871	IMGVR_UViG_3300010885_000115|3300010885|Ga0133913_10040671	IMG_VR v3	Metagenome	3300010885	Linear	12497	Seed	IMG_VR_0871	Partial	ATPase MCP Penton PRO	NA	NA	Maveriviricetes;Priklausovirales;Omnilimnoviroviridae	10.1093/nar/gkaa946 10.1186/s40168-019-0768-5	10.46936/10.25585/60000587
IMG_VR_0872	IMGVR_UViG_3300010885_000117|3300010885|Ga0133913_10042115	IMG_VR v3	Metagenome	3300010885	Linear	12274	Seed	IMG_VR_0872	Partial	ATPase MCP Penton	NA	NA	Maveriviricetes;Unclassified	10.1093/nar/gkaa946 10.1186/s40168-019-0768-5	10.46936/10.25585/60000587
IMG_VR_0873	IMGVR_UViG_3300010885_000118|3300010885|Ga0133913_10042428	IMG_VR v3	Metagenome	3300010885	Linear	12226	Clustered	IMG_VR_1331	NA	NA	NA	NA	NA	10.1093/nar/gkaa946 10.1186/s40168-019-0768-5	10.46936/10.25585/60000587
IMG_VR_0874	IMGVR_UViG_3300010885_000121|3300010885|Ga0133913_10044899	IMG_VR v3	Metagenome	3300010885	Linear	11881	Seed	IMG_VR_0874	Partial	ATPase MCP Penton PRO	NA	NA	Maveriviricetes;Priklausovirales;Omnilimnoviroviridae	10.1093/nar/gkaa946 10.1186/s40168-019-0768-5	10.46936/10.25585/60000587
IMG_VR_0875	IMGVR_UViG_3300010885_000122|3300010885|Ga0133913_10044996	IMG_VR v3	Metagenome	3300010885	Linear	11867	Seed	IMG_VR_0875	Partial	ATPase MCP Penton PRO	NA	NA	Maveriviricetes;Unclassified	10.1093/nar/gkaa946 10.1186/s40168-019-0768-5	10.46936/10.25585/60000587
IMG_VR_0876	IMGVR_UViG_3300010885_000123|3300010885|Ga0133913_10045614	IMG_VR v3	Metagenome	3300010885	Linear	11784	Clustered	IMG_VR_1361	NA	NA	NA	NA	NA	10.1093/nar/gkaa946 10.1186/s40168-019-0768-5	10.46936/10.25585/60000587
IMG_VR_0877	IMGVR_UViG_3300010885_000124|3300010885|Ga0133913_10046103	IMG_VR v3	Metagenome	3300010885	Linear	11721	Seed	IMG_VR_0877	Partial	ATPase MCP Penton	NA	NA	Maveriviricetes;Priklausovirales;Omnilimnoviroviridae	10.1093/nar/gkaa946 10.1186/s40168-019-0768-5	10.46936/10.25585/60000587
IMG_VR_0878	IMGVR_UViG_3300010885_000125|3300010885|Ga0133913_10046438	IMG_VR v3	Metagenome	3300010885	Linear	11679	Seed	IMG_VR_0878	Partial	ATPase MCP Penton PRO	NA	NA	Maveriviricetes;Unclassified	10.1093/nar/gkaa946 10.1186/s40168-019-0768-5	10.46936/10.25585/60000587
IMG_VR_0879	IMGVR_UViG_3300010885_000126|3300010885|Ga0133913_10047170	IMG_VR v3	Metagenome	3300010885	Linear	11580	Clustered	IMG_VR_0616	NA	NA	NA	NA	NA	10.1093/nar/gkaa946 10.1186/s40168-019-0768-5	10.46936/10.25585/60000587
IMG_VR_0880	IMGVR_UViG_3300010885_000127|3300010885|Ga0133913_10048336	IMG_VR v3	Metagenome	3300010885	Linear	11431	Seed	IMG_VR_0880	Partial	ATPase MCP Penton PRO	NA	NA	Maveriviricetes;Unclassified	10.1093/nar/gkaa946 10.1186/s40168-019-0768-5	10.46936/10.25585/60000587
IMG_VR_0881	IMGVR_UViG_3300010885_000128|3300010885|Ga0133913_10048399	IMG_VR v3	Metagenome	3300010885	Linear	11423	Seed	IMG_VR_0881	Partial	ATPase MCP Penton PRO	NA	NA	Maveriviricetes;Mividavirales;Sputniviroviridae	10.1093/nar/gkaa946 10.1186/s40168-019-0768-5	10.46936/10.25585/60000587
IMG_VR_0882	IMGVR_UViG_3300010885_000129|3300010885|Ga0133913_10048696	IMG_VR v3	Metagenome	3300010885	Linear	11389	Seed	IMG_VR_0882	Partial	MCP Penton PRO	NA	NA	Maveriviricetes;Priklausovirales;Burtonviroviridae	10.1093/nar/gkaa946 10.1186/s40168-019-0768-5	10.46936/10.25585/60000587
IMG_VR_0883	IMGVR_UViG_3300010885_000131|3300010885|Ga0133913_10050377	IMG_VR v3	Metagenome	3300010885	Linear	11183	Clustered	IMG_VR_0692	NA	NA	NA	NA	NA	10.1093/nar/gkaa946 10.1186/s40168-019-0768-5	10.46936/10.25585/60000587
IMG_VR_0884	IMGVR_UViG_3300010885_000132|3300010885|Ga0133913_10050520	IMG_VR v3	Metagenome	3300010885	Linear	11164	Seed	IMG_VR_0884	Partial	MCP Penton PRO	NA	NA	Maveriviricetes;Priklausovirales;Burtonviroviridae	10.1093/nar/gkaa946 10.1186/s40168-019-0768-5	10.46936/10.25585/60000587
IMG_VR_0885	IMGVR_UViG_3300010885_000133|3300010885|Ga0133913_10050536	IMG_VR v3	Metagenome	3300010885	Linear	11162	Clustered	IMG_VR_0461	NA	NA	NA	NA	NA	10.1093/nar/gkaa946 10.1186/s40168-019-0768-5	10.46936/10.25585/60000587
IMG_VR_0886	IMGVR_UViG_3300010885_000134|3300010885|Ga0133913_10051232	IMG_VR v3	Metagenome	3300010885	Linear	11083	Seed	IMG_VR_0886	Partial	MCP Penton PRO	NA	NA	Maveriviricetes;Priklausovirales;Burtonviroviridae	10.1093/nar/gkaa946 10.1186/s40168-019-0768-5	10.46936/10.25585/60000587
IMG_VR_0887	IMGVR_UViG_3300010885_000135|3300010885|Ga0133913_10055753	IMG_VR v3	Metagenome	3300010885	Linear	10610	Seed	IMG_VR_0887	Partial	ATPase MCP Penton PRO	NA	NA	Maveriviricetes;Unclassified	10.1093/nar/gkaa946 10.1186/s40168-019-0768-5	10.46936/10.25585/60000587
IMG_VR_0888	IMGVR_UViG_3300010885_000136|3300010885|Ga0133913_10055830	IMG_VR v3	Metagenome	3300010885	Linear	10602	Clustered	IMG_VR_0618	NA	NA	NA	NA	NA	10.1093/nar/gkaa946 10.1186/s40168-019-0768-5	10.46936/10.25585/60000587
IMG_VR_0889	IMGVR_UViG_3300010885_000137|3300010885|Ga0133913_10055954	IMG_VR v3	Metagenome	3300010885	Linear	10589	Clustered	IMG_VR_0462	NA	NA	NA	NA	NA	10.1093/nar/gkaa946 10.1186/s40168-019-0768-5	10.46936/10.25585/60000587
IMG_VR_0890	IMGVR_UViG_3300010885_000138|3300010885|Ga0133913_10057919	IMG_VR v3	Metagenome	3300010885	Linear	10398	Seed	IMG_VR_0890	Partial	MCP Penton PRO	NA	NA	Maveriviricetes;Priklausovirales;Burtonviroviridae	10.1093/nar/gkaa946 10.1186/s40168-019-0768-5	10.46936/10.25585/60000587
IMG_VR_0891	IMGVR_UViG_3300010885_000139|3300010885|Ga0133913_10058147	IMG_VR v3	Metagenome	3300010885	Linear	10376	Clustered	IMG_VR_0504	NA	NA	NA	NA	NA	10.1093/nar/gkaa946 10.1186/s40168-019-0768-5	10.46936/10.25585/60000587
IMG_VR_0892	IMGVR_UViG_3300010885_000141|3300010885|Ga0133913_10058591	IMG_VR v3	Metagenome	3300010885	Linear	10335	Clustered	IMG_VR_0716	NA	NA	NA	NA	NA	10.1093/nar/gkaa946 10.1186/s40168-019-0768-5	10.46936/10.25585/60000587
IMG_VR_0893	IMGVR_UViG_3300010885_000142|3300010885|Ga0133913_10059146	IMG_VR v3	Metagenome	3300010885	Linear	10282	Clustered	IMG_VR_1369	NA	NA	NA	NA	NA	10.1093/nar/gkaa946 10.1186/s40168-019-0768-5	10.46936/10.25585/60000587
IMG_VR_0894	IMGVR_UViG_3300010885_000143|3300010885|Ga0133913_10060220	IMG_VR v3	Metagenome	3300010885	Linear	10180	Seed	IMG_VR_0894	Partial	ATPase MCP Penton PRO	NA	NA	Maveriviricetes;Unclassified	10.1093/nar/gkaa946 10.1186/s40168-019-0768-5	10.46936/10.25585/60000587
IMG_VR_0895	IMGVR_UViG_3300010885_000144|3300010885|Ga0133913_10061498	IMG_VR v3	Metagenome	3300010885	Linear	10069	Seed	IMG_VR_0895	Partial	MCP Penton PRO	NA	NA	Maveriviricetes;Priklausovirales;Burtonviroviridae	10.1093/nar/gkaa946 10.1186/s40168-019-0768-5	10.46936/10.25585/60000587
IMG_VR_0896	IMGVR_UViG_3300010885_000145|3300010885|Ga0133913_10061853	IMG_VR v3	Metagenome	3300010885	Linear	10037	Clustered	IMG_VR_0584	NA	NA	NA	NA	NA	10.1093/nar/gkaa946 10.1186/s40168-019-0768-5	10.46936/10.25585/60000587
IMG_VR_0897	IMGVR_UViG_3300010885_000146|3300010885|Ga0133913_10063584	IMG_VR v3	Metagenome	3300010885	Linear	9893	Clustered	IMG_VR_0595	NA	NA	NA	NA	NA	10.1093/nar/gkaa946 10.1186/s40168-019-0768-5	10.46936/10.25585/60000587
IMG_VR_0898	IMGVR_UViG_3300010885_000148|3300010885|Ga0133913_10063795	IMG_VR v3	Metagenome	3300010885	Linear	9877	Seed	IMG_VR_0898	Partial	MCP Penton	NA	NA	Maveriviricetes;Priklausovirales;Dishuiviroviridae	10.1093/nar/gkaa946 10.1186/s40168-019-0768-5	10.46936/10.25585/60000587
IMG_VR_0899	IMGVR_UViG_3300010885_000149|3300010885|Ga0133913_10063814	IMG_VR v3	Metagenome	3300010885	Linear	9876	Seed	IMG_VR_0899	Partial	ATPase MCP Penton PRO	NA	NA	Maveriviricetes;Unclassified	10.1093/nar/gkaa946 10.1186/s40168-019-0768-5	10.46936/10.25585/60000587
IMG_VR_0900	IMGVR_UViG_3300010885_000152|3300010885|Ga0133913_10069667	IMG_VR v3	Metagenome	3300010885	Linear	9437	Clustered	IMG_VR_0510	NA	NA	NA	NA	NA	10.1093/nar/gkaa946 10.1186/s40168-019-0768-5	10.46936/10.25585/60000587
IMG_VR_0901	IMGVR_UViG_3300010885_000159|3300010885|Ga0133913_10073360	IMG_VR v3	Metagenome	3300010885	Linear	9182	Clustered	IMG_VR_0473	NA	NA	NA	NA	NA	10.1093/nar/gkaa946 10.1186/s40168-019-0768-5	10.46936/10.25585/60000587
IMG_VR_0902	IMGVR_UViG_3300010885_000161|3300010885|Ga0133913_10073431	IMG_VR v3	Metagenome	3300010885	Linear	9178	Clustered	IMG_VR_0468	NA	NA	NA	NA	NA	10.1093/nar/gkaa946 10.1186/s40168-019-0768-5	10.46936/10.25585/60000587
IMG_VR_0903	IMGVR_UViG_3300010885_000162|3300010885|Ga0133913_10073506	IMG_VR v3	Metagenome	3300010885	Linear	9172	Seed	IMG_VR_0903	Partial	ATPase MCP Penton PRO	NA	NA	Maveriviricetes;Unclassified	10.1093/nar/gkaa946 10.1186/s40168-019-0768-5	10.46936/10.25585/60000587
IMG_VR_0904	IMGVR_UViG_3300010885_000166|3300010885|Ga0133913_10076442	IMG_VR v3	Metagenome	3300010885	Linear	8981	Seed	IMG_VR_0904	Partial	ATPase MCP Penton PRO	NA	NA	Maveriviricetes;Priklausovirales;Dishuiviroviridae	10.1093/nar/gkaa946 10.1186/s40168-019-0768-5	10.46936/10.25585/60000587
IMG_VR_0905	IMGVR_UViG_3300010885_000167|3300010885|Ga0133913_10079216	IMG_VR v3	Metagenome	3300010885	Linear	8812	Seed	IMG_VR_0905	Partial	MCP Penton PRO	NA	NA	Maveriviricetes;Priklausovirales;Omnilimnoviroviridae	10.1093/nar/gkaa946 10.1186/s40168-019-0768-5	10.46936/10.25585/60000587
IMG_VR_0906	IMGVR_UViG_3300010885_000170|3300010885|Ga0133913_10079639	IMG_VR v3	Metagenome	3300010885	Linear	8786	Seed	IMG_VR_0906	Partial	MCP Penton PRO	NA	NA	Maveriviricetes;Priklausovirales;Omnilimnoviroviridae	10.1093/nar/gkaa946 10.1186/s40168-019-0768-5	10.46936/10.25585/60000587
IMG_VR_0907	IMGVR_UViG_3300010885_000173|3300010885|Ga0133913_10081904	IMG_VR v3	Metagenome	3300010885	Linear	8654	Seed	IMG_VR_0907	Partial	ATPase MCP Penton	NA	NA	Maveriviricetes;Priklausovirales;Omnilimnoviroviridae	10.1093/nar/gkaa946 10.1186/s40168-019-0768-5	10.46936/10.25585/60000587
IMG_VR_0908	IMGVR_UViG_3300010885_000175|3300010885|Ga0133913_10083555	IMG_VR v3	Metagenome	3300010885	Linear	8562	Seed	IMG_VR_0908	Partial	MCP Penton PRO	NA	NA	Maveriviricetes;Unclassified	10.1093/nar/gkaa946 10.1186/s40168-019-0768-5	10.46936/10.25585/60000587
IMG_VR_0909	IMGVR_UViG_3300010885_000176|3300010885|Ga0133913_10083912	IMG_VR v3	Metagenome	3300010885	Linear	8543	Seed	IMG_VR_0909	Partial	MCP Penton PRO	NA	NA	Maveriviricetes;Priklausovirales;Dishuiviroviridae	10.1093/nar/gkaa946 10.1186/s40168-019-0768-5	10.46936/10.25585/60000587
IMG_VR_0910	IMGVR_UViG_3300010885_000177|3300010885|Ga0133913_10087213	IMG_VR v3	Metagenome	3300010885	Linear	8366	Clustered	IMG_VR_0553	NA	NA	NA	NA	NA	10.1093/nar/gkaa946 10.1186/s40168-019-0768-5	10.46936/10.25585/60000587
IMG_VR_0911	IMGVR_UViG_3300010885_000179|3300010885|Ga0133913_10088159	IMG_VR v3	Metagenome	3300010885	Linear	8316	Seed	IMG_VR_0911	Partial	ATPase MCP Penton PRO	NA	NA	Maveriviricetes;Unclassified	10.1093/nar/gkaa946 10.1186/s40168-019-0768-5	10.46936/10.25585/60000587
IMG_VR_0912	IMGVR_UViG_3300010885_000181|3300010885|Ga0133913_10088598	IMG_VR v3	Metagenome	3300010885	Linear	8296	Seed	IMG_VR_0912	Partial	ATPase MCP Penton	NA	NA	Maveriviricetes;Priklausovirales;Omnilimnoviroviridae	10.1093/nar/gkaa946 10.1186/s40168-019-0768-5	10.46936/10.25585/60000587
IMG_VR_0913	IMGVR_UViG_3300010885_000183|3300010885|Ga0133913_10091266	IMG_VR v3	Metagenome	3300010885	Linear	8169	Seed	IMG_VR_0913	Partial	MCP Penton PRO	NA	NA	Maveriviricetes;Priklausovirales;Burtonviroviridae	10.1093/nar/gkaa946 10.1186/s40168-019-0768-5	10.46936/10.25585/60000587
IMG_VR_0914	IMGVR_UViG_3300010885_000185|3300010885|Ga0133913_10093062	IMG_VR v3	Metagenome	3300010885	Linear	8080	Seed	IMG_VR_0914	Partial	ATPase MCP Penton PRO	NA	NA	Maveriviricetes;Unclassified	10.1093/nar/gkaa946 10.1186/s40168-019-0768-5	10.46936/10.25585/60000587
IMG_VR_0915	IMGVR_UViG_3300010885_000187|3300010885|Ga0133913_10093537	IMG_VR v3	Metagenome	3300010885	Linear	8057	Seed	IMG_VR_0915	Partial	MCP Penton PRO	NA	NA	Maveriviricetes;Priklausovirales;Burtonviroviridae	10.1093/nar/gkaa946 10.1186/s40168-019-0768-5	10.46936/10.25585/60000587
IMG_VR_0916	IMGVR_UViG_3300010885_000188|3300010885|Ga0133913_10102046	IMG_VR v3	Metagenome	3300010885	Linear	7683	Clustered	IMG_VR_0731	NA	NA	NA	NA	NA	10.1093/nar/gkaa946 10.1186/s40168-019-0768-5	10.46936/10.25585/60000587
IMG_VR_0917	IMGVR_UViG_3300010885_000189|3300010885|Ga0133913_10104730	IMG_VR v3	Metagenome	3300010885	Linear	7578	Seed	IMG_VR_0917	Partial	ATPase MCP Penton	NA	NA	Maveriviricetes;Priklausovirales;Dishuiviroviridae	10.1093/nar/gkaa946 10.1186/s40168-019-0768-5	10.46936/10.25585/60000587
IMG_VR_0918	IMGVR_UViG_3300010885_000191|3300010885|Ga0133913_10105779	IMG_VR v3	Metagenome	3300010885	Linear	7540	Clustered	IMG_VR_0545	NA	NA	NA	NA	NA	10.1093/nar/gkaa946 10.1186/s40168-019-0768-5	10.46936/10.25585/60000587
IMG_VR_0919	IMGVR_UViG_3300010885_000196|3300010885|Ga0133913_10114015	IMG_VR v3	Metagenome	3300010885	Linear	7243	Seed	IMG_VR_0919	Partial	MCP Penton PRO	NA	NA	Maveriviricetes;Unclassified	10.1093/nar/gkaa946 10.1186/s40168-019-0768-5	10.46936/10.25585/60000587
IMG_VR_0920	IMGVR_UViG_3300010885_000199|3300010885|Ga0133913_10122013	IMG_VR v3	Metagenome	3300010885	Linear	6984	Seed	IMG_VR_0920	Partial	MCP Penton	NA	NA	Maveriviricetes;Priklausovirales;Burtonviroviridae	10.1093/nar/gkaa946 10.1186/s40168-019-0768-5	10.46936/10.25585/60000587
IMG_VR_0921	IMGVR_UViG_3300010885_000200|3300010885|Ga0133913_10123956	IMG_VR v3	Metagenome	3300010885	Linear	6922	Seed	IMG_VR_0921	Partial	MCP Penton PRO	NA	NA	Maveriviricetes;Priklausovirales;Burtonviroviridae	10.1093/nar/gkaa946 10.1186/s40168-019-0768-5	10.46936/10.25585/60000587
IMG_VR_0922	IMGVR_UViG_3300010885_000202|3300010885|Ga0133913_10127114	IMG_VR v3	Metagenome	3300010885	Linear	6825	Seed	IMG_VR_0922	Partial	MCP Penton PRO	NA	NA	Maveriviricetes;Priklausovirales;Burtonviroviridae	10.1093/nar/gkaa946 10.1186/s40168-019-0768-5	10.46936/10.25585/60000587
IMG_VR_0923	IMGVR_UViG_3300010885_000204|3300010885|Ga0133913_10128570	IMG_VR v3	Metagenome	3300010885	Linear	6782	Clustered	IMG_VR_0509	NA	NA	NA	NA	NA	10.1093/nar/gkaa946 10.1186/s40168-019-0768-5	10.46936/10.25585/60000587
IMG_VR_0924	IMGVR_UViG_3300010885_000205|3300010885|Ga0133913_10130197	IMG_VR v3	Metagenome	3300010885	Linear	6736	Seed	IMG_VR_0924	Partial	ATPase MCP Penton PRO	NA	NA	Maveriviricetes;Priklausovirales;Burtonviroviridae	10.1093/nar/gkaa946 10.1186/s40168-019-0768-5	10.46936/10.25585/60000587
IMG_VR_0925	IMGVR_UViG_3300010885_000206|3300010885|Ga0133913_10130670	IMG_VR v3	Metagenome	3300010885	Linear	6723	Seed	IMG_VR_0925	Partial	MCP Penton PRO	NA	NA	Maveriviricetes;Unclassified	10.1093/nar/gkaa946 10.1186/s40168-019-0768-5	10.46936/10.25585/60000587
IMG_VR_0926	IMGVR_UViG_3300010885_000207|3300010885|Ga0133913_10130833	IMG_VR v3	Metagenome	3300010885	Linear	6719	Seed	IMG_VR_0926	Partial	ATPase MCP Penton PRO	NA	NA	Maveriviricetes;Priklausovirales;Burtonviroviridae	10.1093/nar/gkaa946 10.1186/s40168-019-0768-5	10.46936/10.25585/60000587
IMG_VR_0927	IMGVR_UViG_3300010885_000209|3300010885|Ga0133913_10131983	IMG_VR v3	Metagenome	3300010885	Linear	6686	Clustered	IMG_VR_1136	NA	NA	NA	NA	NA	10.1093/nar/gkaa946 10.1186/s40168-019-0768-5	10.46936/10.25585/60000587
IMG_VR_0928	IMGVR_UViG_3300010885_000213|3300010885|Ga0133913_10136777	IMG_VR v3	Metagenome	3300010885	Linear	6559	Seed	IMG_VR_0928	Partial	MCP Penton PRO	NA	NA	Maveriviricetes;Priklausovirales;Omnilimnoviroviridae	10.1093/nar/gkaa946 10.1186/s40168-019-0768-5	10.46936/10.25585/60000587
IMG_VR_0929	IMGVR_UViG_3300010885_000216|3300010885|Ga0133913_10140008	IMG_VR v3	Metagenome	3300010885	Linear	6476	Seed	IMG_VR_0929	Partial	MCP Penton PRO	NA	NA	Maveriviricetes;Priklausovirales;Burtonviroviridae	10.1093/nar/gkaa946 10.1186/s40168-019-0768-5	10.46936/10.25585/60000587
IMG_VR_0930	IMGVR_UViG_3300010885_000217|3300010885|Ga0133913_10141847	IMG_VR v3	Metagenome	3300010885	Linear	6430	Seed	IMG_VR_0930	Partial	ATPase MCP Penton PRO	NA	NA	Maveriviricetes;Unclassified	10.1093/nar/gkaa946 10.1186/s40168-019-0768-5	10.46936/10.25585/60000587
IMG_VR_0931	IMGVR_UViG_3300010885_000225|3300010885|Ga0133913_10155988	IMG_VR v3	Metagenome	3300010885	Linear	6105	Clustered	IMG_VR_0474	NA	NA	NA	NA	NA	10.1093/nar/gkaa946 10.1186/s40168-019-0768-5	10.46936/10.25585/60000587
IMG_VR_0932	IMGVR_UViG_3300010885_000226|3300010885|Ga0133913_10156008	IMG_VR v3	Metagenome	3300010885	Linear	6105	Clustered	IMG_VR_0696	NA	NA	NA	NA	NA	10.1093/nar/gkaa946 10.1186/s40168-019-0768-5	10.46936/10.25585/60000587
IMG_VR_0933	IMGVR_UViG_3300010885_000227|3300010885|Ga0133913_10160944	IMG_VR v3	Metagenome	3300010885	Linear	6002	Seed	IMG_VR_0933	Partial	MCP Penton PRO	NA	NA	Maveriviricetes;Priklausovirales;Burtonviroviridae	10.1093/nar/gkaa946 10.1186/s40168-019-0768-5	10.46936/10.25585/60000587
IMG_VR_0934	IMGVR_UViG_3300010885_000228|3300010885|Ga0133913_10161062	IMG_VR v3	Metagenome	3300010885	Linear	5999	Seed	IMG_VR_0934	Partial	MCP Penton PRO	NA	NA	Maveriviricetes;Unclassified	10.1093/nar/gkaa946 10.1186/s40168-019-0768-5	10.46936/10.25585/60000587
IMG_VR_0935	IMGVR_UViG_3300010885_000230|3300010885|Ga0133913_10162736	IMG_VR v3	Metagenome	3300010885	Linear	5965	Seed	IMG_VR_0935	Partial	MCP Penton PRO	NA	NA	Maveriviricetes;Unclassified	10.1093/nar/gkaa946 10.1186/s40168-019-0768-5	10.46936/10.25585/60000587
IMG_VR_0936	IMGVR_UViG_3300010885_000231|3300010885|Ga0133913_10162823	IMG_VR v3	Metagenome	3300010885	Linear	5963	Seed	IMG_VR_0936	Partial	MCP Penton PRO	NA	NA	Maveriviricetes;Priklausovirales;Burtonviroviridae	10.1093/nar/gkaa946 10.1186/s40168-019-0768-5	10.46936/10.25585/60000587
IMG_VR_0937	IMGVR_UViG_3300010885_000235|3300010885|Ga0133913_10169922	IMG_VR v3	Metagenome	3300010885	Linear	5824	Seed	IMG_VR_0937	Partial	MCP Penton PRO	NA	NA	Maveriviricetes;Priklausovirales;Burtonviroviridae	10.1093/nar/gkaa946 10.1186/s40168-019-0768-5	10.46936/10.25585/60000587
IMG_VR_0938	IMGVR_UViG_3300010885_000236|3300010885|Ga0133913_10170796	IMG_VR v3	Metagenome	3300010885	Linear	5808	Clustered	IMG_VR_0705	NA	NA	NA	NA	NA	10.1093/nar/gkaa946 10.1186/s40168-019-0768-5	10.46936/10.25585/60000587
IMG_VR_0939	IMGVR_UViG_3300010885_000247|3300010885|Ga0133913_10190421	IMG_VR v3	Metagenome	3300010885	Linear	5471	Seed	IMG_VR_0939	Partial	ATPase MCP Penton PRO	NA	NA	Maveriviricetes;Unclassified	10.1093/nar/gkaa946 10.1186/s40168-019-0768-5	10.46936/10.25585/60000587
IMG_VR_0940	IMGVR_UViG_3300010885_000248|3300010885|Ga0133913_10191974	IMG_VR v3	Metagenome	3300010885	Linear	5448	Seed	IMG_VR_0940	Partial	MCP Penton PRO	NA	NA	Maveriviricetes;Priklausovirales;Burtonviroviridae	10.1093/nar/gkaa946 10.1186/s40168-019-0768-5	10.46936/10.25585/60000587
IMG_VR_0941	IMGVR_UViG_3300010885_000249|3300010885|Ga0133913_10192025	IMG_VR v3	Metagenome	3300010885	Linear	5447	Clustered	IMG_VR_0442	NA	NA	NA	NA	NA	10.1093/nar/gkaa946 10.1186/s40168-019-0768-5	10.46936/10.25585/60000587
IMG_VR_0942	IMGVR_UViG_3300010885_000251|3300010885|Ga0133913_10192930	IMG_VR v3	Metagenome	3300010885	Linear	5433	Seed	IMG_VR_0942	Partial	ATPase MCP Penton	NA	NA	Maveriviricetes;Priklausovirales;Dishuiviroviridae	10.1093/nar/gkaa946 10.1186/s40168-019-0768-5	10.46936/10.25585/60000587
IMG_VR_0943	IMGVR_UViG_3300010885_000257|3300010885|Ga0133913_10201666	IMG_VR v3	Metagenome	3300010885	Linear	5302	Clustered	IMG_VR_1547	NA	NA	NA	NA	NA	10.1093/nar/gkaa946 10.1186/s40168-019-0768-5	10.46936/10.25585/60000587
IMG_VR_0944	IMGVR_UViG_3300010885_000259|3300010885|Ga0133913_10204927	IMG_VR v3	Metagenome	3300010885	Linear	5256	Clustered	IMG_VR_0444	NA	NA	NA	NA	NA	10.1093/nar/gkaa946 10.1186/s40168-019-0768-5	10.46936/10.25585/60000587
IMG_VR_0945	IMGVR_UViG_3300010885_000268|3300010885|Ga0133913_10222834	IMG_VR v3	Metagenome	3300010885	Linear	5018	Clustered	IMG_VR_0694	NA	NA	NA	NA	NA	10.1093/nar/gkaa946 10.1186/s40168-019-0768-5	10.46936/10.25585/60000587
IMG_VR_0946	IMGVR_UViG_3300010938_000189|3300010938|Ga0137716_10013251	IMG_VR v3	Metagenome	3300010938	Linear	14284	Seed	IMG_VR_0946	Partial	ATPase MCP Penton PRO	NA	NA	Maveriviricetes;Unclassified	10.1093/nar/gkaa946
IMG_VR_0947	IMGVR_UViG_3300011186_000028|3300011186|Ga0136553_1001427	IMG_VR v3	Metagenome	3300011186	Linear	7799	Clustered	Organic_Lake_virophage	NA	NA	NA	NA	NA	10.1093/nar/gkaa946 10.3389/fmicb.2021.674758	10.46936/10.25585/60001034
IMG_VR_0948	IMGVR_UViG_3300011186_000029|3300011186|Ga0136553_1003043	IMG_VR v3	Metagenome	3300011186	Linear	5002	Seed	IMG_VR_0948	Partial	MCP Penton PRO	NA	NA	Maveriviricetes;Priklausovirales;Omnilimnoviroviridae	10.1093/nar/gkaa946 10.3389/fmicb.2021.674758	10.46936/10.25585/60001034
IMG_VR_0949	IMGVR_UViG_3300011188_000100|3300011188|Ga0136587_1000167	IMG_VR v3	Metagenome	3300011188	Linear	17998	Clustered	IMG_VR_0959	NA	NA	NA	NA	NA	10.1093/nar/gkaa946 10.1186/s40168-018-0495-3	10.46936/10.25585/60001034
IMG_VR_0950	IMGVR_UViG_3300011188_000101|3300011188|Ga0136587_1001100	IMG_VR v3	Metagenome	3300011188	Linear	7257	Seed	IMG_VR_0950	Partial	ATPase MCP Penton PRO	NA	NA	Maveriviricetes;Unclassified	10.1093/nar/gkaa946 10.1186/s40168-018-0495-3	10.46936/10.25585/60001034
IMG_VR_0951	IMGVR_UViG_3300012029_000085|3300012029|Ga0136572_1000332	IMG_VR v3	Metagenome	3300012029	Linear	17998	Clustered	IMG_VR_0959	NA	NA	NA	NA	NA	10.1093/nar/gkaa946 10.1186/s40168-018-0495-3	10.46936/10.25585/60001034
IMG_VR_0952	IMGVR_UViG_3300012029_000086|3300012029|Ga0136572_1001782	IMG_VR v3	Metagenome	3300012029	Linear	6119	Clustered	IMG_VR_1378	NA	NA	NA	NA	NA	10.1093/nar/gkaa946 10.1186/s40168-018-0495-3	10.46936/10.25585/60001034
IMG_VR_0953	IMGVR_UViG_3300012031_000435|3300012031|Ga0136561_1000274	IMG_VR v3	Metagenome	3300012031	Linear	17998	Clustered	IMG_VR_0959	NA	NA	NA	NA	NA	10.1093/nar/gkaa946 10.1186/s40168-019-0768-5	10.46936/10.25585/60001034
IMG_VR_0954	IMGVR_UViG_3300012031_000436|3300012031|Ga0136561_1000658	IMG_VR v3	Metagenome	3300012031	Linear	10934	Seed	IMG_VR_0954	Partial	ATPase MCP Penton	NA	NA	Maveriviricetes;Priklausovirales;Burtonviroviridae	10.1093/nar/gkaa946 10.1186/s40168-019-0768-5	10.46936/10.25585/60001034
IMG_VR_0955	IMGVR_UViG_3300012032_000051|3300012032|Ga0136554_1003394	IMG_VR v3	Metagenome	3300012032	Linear	6987	Seed	IMG_VR_0955	Partial	MCP Penton PRO	NA	NA	Maveriviricetes;Priklausovirales;Omnilimnoviroviridae	10.1093/nar/gkaa946 10.3389/fmicb.2021.674758	10.46936/10.25585/60001034
IMG_VR_0956	IMGVR_UViG_3300012037_000085|3300012037|Ga0136559_1000405	IMG_VR v3	Metagenome	3300012037	Linear	14838	Clustered	IMG_VR_0959	NA	NA	NA	NA	NA	10.1093/nar/gkaa946 10.3389/fmicb.2021.674758	10.46936/10.25585/60001034
IMG_VR_0957	IMGVR_UViG_3300012037_000086|3300012037|Ga0136559_1002753	IMG_VR v3	Metagenome	3300012037	Linear	5272	Seed	IMG_VR_0957	Partial	ATPase MCP Penton PRO	NA	NA	Maveriviricetes;Lavidavirales;Maviroviridae	10.1093/nar/gkaa946 10.3389/fmicb.2021.674758	10.46936/10.25585/60001034
IMG_VR_0958	IMGVR_UViG_3300012128_000020|3300012128|Ga0136582_1000547	IMG_VR v3	Metagenome	3300012128	Linear	10777	Clustered	Organic_Lake_virophage	NA	NA	NA	NA	NA	10.1093/nar/gkaa946 10.1186/s40168-018-0495-3 10.1186/s40168-019-0768-5	10.46936/10.25585/60001034
IMG_VR_0959	IMGVR_UViG_3300012145_000080|3300012145|Ga0136566_1000368	IMG_VR v3	Metagenome	3300012145	Linear	18098	Seed	IMG_VR_0959	Partial	ATPase MCP Penton PRO	NA	NA	Maveriviricetes;Lavidavirales;Maviroviridae	10.1093/nar/gkaa946 10.1186/s40168-018-0495-3 10.1186/s40168-019-0768-5	10.46936/10.25585/60001034
IMG_VR_0960	IMGVR_UViG_3300012147_000492|3300012147|Ga0136588_1000324	IMG_VR v3	Metagenome	3300012147	Linear	17951	Clustered	IMG_VR_0959	NA	NA	NA	NA	NA	10.1093/nar/gkaa946 10.1186/s40168-018-0495-3 10.1186/s40168-019-0768-5	10.46936/10.25585/60001034
IMG_VR_0961	IMGVR_UViG_3300012147_000493|3300012147|Ga0136588_1000520	IMG_VR v3	Metagenome	3300012147	Linear	13970	Clustered	PE_289	NA	NA	NA	NA	NA	10.1093/nar/gkaa946 10.1186/s40168-018-0495-3 10.1186/s40168-019-0768-5	10.46936/10.25585/60001034
IMG_VR_0962	IMGVR_UViG_3300012147_000494|3300012147|Ga0136588_1000554	IMG_VR v3	Metagenome	3300012147	Linear	13510	Seed	IMG_VR_0962	Partial	ATPase MCP Penton PRO	NA	NA	Maveriviricetes;Mividavirales;Sputniviroviridae	10.1093/nar/gkaa946 10.1186/s40168-018-0495-3 10.1186/s40168-019-0768-5	10.46936/10.25585/60001034
IMG_VR_0963	IMGVR_UViG_3300012147_000495|3300012147|Ga0136588_1000892	IMG_VR v3	Metagenome	3300012147	Linear	10278	Clustered	IMG_VR_1350	NA	NA	NA	NA	NA	10.1093/nar/gkaa946 10.1186/s40168-018-0495-3 10.1186/s40168-019-0768-5	10.46936/10.25585/60001034
IMG_VR_0964	IMGVR_UViG_3300012147_000497|3300012147|Ga0136588_1001711	IMG_VR v3	Metagenome	3300012147	Linear	6554	Seed	IMG_VR_0964	Partial	ATPase MCP Penton PRO	NA	NA	Maveriviricetes;Unclassified	10.1093/nar/gkaa946 10.1186/s40168-018-0495-3 10.1186/s40168-019-0768-5	10.46936/10.25585/60001034
IMG_VR_0965	IMGVR_UViG_3300012178_000145|3300012178|Ga0136557_1004386	IMG_VR v3	Metagenome	3300012178	Linear	6986	Clustered	IMG_VR_1421	NA	NA	NA	NA	NA	10.1093/nar/gkaa946 10.1186/s40168-018-0495-3	10.46936/10.25585/60001034
IMG_VR_0966	IMGVR_UViG_3300012263_000070|3300012263|Ga0136564_1000263	IMG_VR v3	Metagenome	3300012263	Linear	17998	Clustered	IMG_VR_0959	NA	NA	NA	NA	NA	10.1093/nar/gkaa946 10.1186/s40168-018-0495-3	10.46936/10.25585/60001034
IMG_VR_0967	IMGVR_UViG_3300012269_000096|3300012269|Ga0136560_1001732	IMG_VR v3	Metagenome	3300012269	Linear	11236	Clustered	IMG_VR_0959	NA	NA	NA	NA	NA	10.1093/nar/gkaa946 10.3389/fmicb.2021.674758	10.46936/10.25585/60001034
IMG_VR_0968	IMGVR_UViG_3300012269_000097|3300012269|Ga0136560_1004865	IMG_VR v3	Metagenome	3300012269	Linear	6007	Clustered	IMG_VR_0972	NA	NA	NA	NA	NA	10.1093/nar/gkaa946 10.3389/fmicb.2021.674758	10.46936/10.25585/60001034
IMG_VR_0969	IMGVR_UViG_3300012270_000026|3300012270|Ga0136604_1000462	IMG_VR v3	Metagenome	3300012270	Linear	20129	Clustered	IMG_VR_1360	NA	NA	NA	NA	NA	10.1093/nar/gkaa946 10.1186/s40168-019-0768-5	10.46936/10.25585/60001034
IMG_VR_0970	IMGVR_UViG_3300012270_000137|3300012270|Ga0136604_1001646	IMG_VR v3	Metagenome	3300012270	Linear	9814	Seed	IMG_VR_0970	Partial	ATPase MCP Penton PRO	NA	NA	Maveriviricetes;Unclassified	10.1093/nar/gkaa946 10.1186/s40168-019-0768-5	10.46936/10.25585/60001034
IMG_VR_0971	IMGVR_UViG_3300012272_000092|3300012272|Ga0136586_1000146	IMG_VR v3	Metagenome	3300012272	Linear	17998	Clustered	IMG_VR_0959	NA	NA	NA	NA	NA	10.1093/nar/gkaa946 10.1186/s40168-018-0495-3	10.46936/10.25585/60001034
IMG_VR_0972	IMGVR_UViG_3300012272_000093|3300012272|Ga0136586_1000687	IMG_VR v3	Metagenome	3300012272	Linear	8703	Seed	IMG_VR_0972	Partial	MCP Penton PRO	NA	NA	Maveriviricetes;Lavidavirales;Maviroviridae	10.1093/nar/gkaa946 10.1186/s40168-018-0495-3	10.46936/10.25585/60001034
IMG_VR_0973	IMGVR_UViG_3300012272_000094|3300012272|Ga0136586_1001875	IMG_VR v3	Metagenome	3300012272	Linear	5222	Seed	IMG_VR_0973	Partial	ATPase MCP Penton PRO	NA	NA	Maveriviricetes;Lavidavirales;Maviroviridae	10.1093/nar/gkaa946 10.1186/s40168-018-0495-3	10.46936/10.25585/60001034
IMG_VR_0974	IMGVR_UViG_3300012533_000236|3300012533|Ga0138256_10005174	IMG_VR v3	Metagenome	3300012533	Linear	13836	Seed	IMG_VR_0974	Partial	ATPase MCP Penton PRO	NA	NA	Maveriviricetes;Unclassified	10.1093/nar/gkaa946 10.1186/s40168-019-0768-5	10.46936/10.25585/60000917
IMG_VR_0975	IMGVR_UViG_3300012533_000237|3300012533|Ga0138256_10011891	IMG_VR v3	Metagenome	3300012533	Linear	9152	Seed	IMG_VR_0975	Partial	ATPase MCP Penton PRO	NA	NA	Maveriviricetes;Unclassified	10.1093/nar/gkaa946 10.1186/s40168-019-0768-5	10.46936/10.25585/60000917
IMG_VR_0978	IMGVR_UViG_3300013004_001346|3300013004|Ga0164293_10000722	IMG_VR v3	Metagenome	3300013004	Linear	27069	Seed	IMG_VR_0978	Near-complete	ATPase MCP Penton PRO	Group 001	Aquatic virophages 1	Maveriviricetes;Priklausovirales;Omnilimnoviroviridae	10.1093/nar/gkaa946 10.1186/s40168-019-0768-5	10.46936/10.25585/60000947
IMG_VR_0979	IMGVR_UViG_3300013005_001187|3300013005|Ga0164292_10015260	IMG_VR v3	Metagenome	3300013005	Linear	6288	Seed	IMG_VR_0979	Partial	MCP Penton PRO	NA	NA	Maveriviricetes;Unclassified	10.1002/lno.11306 10.1093/nar/gkaa946	10.46936/10.25585/60000947
IMG_VR_0980	IMGVR_UViG_3300013006_000502|3300013006|Ga0164294_10001226	IMG_VR v3	Metagenome	3300013006	Linear	23808	Clustered	PE_299	NA	NA	NA	NA	NA	10.1002/lno.11306 10.1093/nar/gkaa946	10.46936/10.25585/60000947
IMG_VR_0981	IMGVR_UViG_3300013014_000507|3300013014|Ga0164295_10000960	IMG_VR v3	Metagenome	3300013014	Linear	23808	Clustered	PE_299	NA	NA	NA	NA	NA	10.1093/nar/gkaa946 10.1186/s40168-019-0768-5	10.46936/10.25585/60000947
IMG_VR_0982	IMGVR_UViG_3300013093_001511|3300013093|Ga0164296_1001421	IMG_VR v3	Metagenome	3300013093	Linear	25448	Clustered	IMG_VR_0990	NA	NA	NA	NA	NA	10.1093/nar/gkaa946 10.1186/s40168-019-0768-5	10.46936/10.25585/60000947
IMG_VR_0983	IMGVR_UViG_3300013093_001512|3300013093|Ga0164296_1002074	IMG_VR v3	Metagenome	3300013093	Linear	20317	Seed	IMG_VR_0983	Partial	ATPase MCP Penton PRO	NA	NA	Maveriviricetes;Priklausovirales;Burtonviroviridae	10.1093/nar/gkaa946 10.1186/s40168-019-0768-5	10.46936/10.25585/60000947
IMG_VR_0984	IMGVR_UViG_3300013093_001513|3300013093|Ga0164296_1003181	IMG_VR v3	Metagenome	3300013093	Linear	15670	Seed	IMG_VR_0984	Partial	ATPase MCP Penton PRO	NA	NA	Maveriviricetes;Unclassified	10.1093/nar/gkaa946 10.1186/s40168-019-0768-5	10.46936/10.25585/60000947
IMG_VR_0985	IMGVR_UViG_3300013093_001514|3300013093|Ga0164296_1003191	IMG_VR v3	Metagenome	3300013093	Linear	15629	Seed	IMG_VR_0985	Partial	ATPase MCP Penton PRO	NA	NA	Maveriviricetes;Priklausovirales;Burtonviroviridae	10.1093/nar/gkaa946 10.1186/s40168-019-0768-5	10.46936/10.25585/60000947
IMG_VR_0986	IMGVR_UViG_3300013093_001515|3300013093|Ga0164296_1003974	IMG_VR v3	Metagenome	3300013093	Linear	13657	Clustered	IMG_VR_0992	NA	NA	NA	NA	NA	10.1093/nar/gkaa946 10.1186/s40168-019-0768-5	10.46936/10.25585/60000947
IMG_VR_0987	IMGVR_UViG_3300013093_001517|3300013093|Ga0164296_1006350	IMG_VR v3	Metagenome	3300013093	Linear	10050	Clustered	IMG_VR_0995	NA	NA	NA	NA	NA	10.1093/nar/gkaa946 10.1186/s40168-019-0768-5	10.46936/10.25585/60000947
IMG_VR_0988	IMGVR_UViG_3300013093_001519|3300013093|Ga0164296_1009702	IMG_VR v3	Metagenome	3300013093	Linear	7415	Clustered	IMG_VR_1118	NA	NA	NA	NA	NA	10.1093/nar/gkaa946 10.1186/s40168-019-0768-5	10.46936/10.25585/60000947
IMG_VR_0989	IMGVR_UViG_3300013093_001520|3300013093|Ga0164296_1011130	IMG_VR v3	Metagenome	3300013093	Linear	6692	Clustered	IMG_VR_0997	NA	NA	NA	NA	NA	10.1093/nar/gkaa946 10.1186/s40168-019-0768-5	10.46936/10.25585/60000947
IMG_VR_0990	IMGVR_UViG_3300013094_001530|3300013094|Ga0164297_10001420	IMG_VR v3	Metagenome	3300013094	DTR	25331	Seed	IMG_VR_0990	Complete	ATPase MCP Penton PRO	Group 001	Aquatic virophages 1	Maveriviricetes;Priklausovirales;Omnilimnoviroviridae	10.1093/nar/gkaa946 10.1186/s40168-019-0768-5	10.46936/10.25585/60000947
IMG_VR_0991	IMGVR_UViG_3300013094_001531|3300013094|Ga0164297_10002054	IMG_VR v3	Metagenome	3300013094	Linear	20317	Clustered	IMG_VR_0983	NA	NA	NA	NA	NA	10.1093/nar/gkaa946 10.1186/s40168-019-0768-5	10.46936/10.25585/60000947
IMG_VR_0992	IMGVR_UViG_3300013094_001532|3300013094|Ga0164297_10003112	IMG_VR v3	Metagenome	3300013094	Linear	15710	Seed	IMG_VR_0992	Partial	ATPase MCP Penton PRO	NA	NA	Maveriviricetes;Priklausovirales;Dishuiviroviridae	10.1093/nar/gkaa946 10.1186/s40168-019-0768-5	10.46936/10.25585/60000947
IMG_VR_0993	IMGVR_UViG_3300013094_001533|3300013094|Ga0164297_10003201	IMG_VR v3	Metagenome	3300013094	Linear	15380	Clustered	IMG_VR_0984	NA	NA	NA	NA	NA	10.1093/nar/gkaa946 10.1186/s40168-019-0768-5	10.46936/10.25585/60000947
IMG_VR_0994	IMGVR_UViG_3300013094_001534|3300013094|Ga0164297_10003461	IMG_VR v3	Metagenome	3300013094	Linear	14645	Clustered	IMG_VR_1118	NA	NA	NA	NA	NA	10.1093/nar/gkaa946 10.1186/s40168-019-0768-5	10.46936/10.25585/60000947
IMG_VR_0995	IMGVR_UViG_3300013094_001536|3300013094|Ga0164297_10004528	IMG_VR v3	Metagenome	3300013094	Linear	12367	Seed	IMG_VR_0995	Partial	ATPase MCP Penton PRO	NA	NA	Maveriviricetes;Unclassified	10.1093/nar/gkaa946 10.1186/s40168-019-0768-5	10.46936/10.25585/60000947
IMG_VR_0996	IMGVR_UViG_3300013094_001537|3300013094|Ga0164297_10004763	IMG_VR v3	Metagenome	3300013094	Linear	11991	Seed	IMG_VR_0996	Partial	MCP Penton PRO	NA	NA	Maveriviricetes;Priklausovirales;Burtonviroviridae	10.1093/nar/gkaa946 10.1186/s40168-019-0768-5	10.46936/10.25585/60000947
IMG_VR_0997	IMGVR_UViG_3300013094_001538|3300013094|Ga0164297_10004830	IMG_VR v3	Metagenome	3300013094	Linear	11891	Seed	IMG_VR_0997	Partial	ATPase MCP Penton PRO	NA	NA	Maveriviricetes;Unclassified	10.1093/nar/gkaa946 10.1186/s40168-019-0768-5	10.46936/10.25585/60000947
IMG_VR_0998	IMGVR_UViG_3300013094_001539|3300013094|Ga0164297_10012038	IMG_VR v3	Metagenome	3300013094	Linear	6250	Clustered	IMG_VR_0985	NA	NA	NA	NA	NA	10.1093/nar/gkaa946 10.1186/s40168-019-0768-5	10.46936/10.25585/60000947
IMG_VR_0999	IMGVR_UViG_3300013099_000542|3300013099|Ga0164315_10002992	IMG_VR v3	Metagenome	3300013099	Linear	13034	Seed	IMG_VR_0999	Partial	ATPase MCP Penton PRO	NA	NA	Maveriviricetes;Priklausovirales;Omnilimnoviroviridae	10.1038/s41467-018-07418-0 10.1093/nar/gkaa946 10.1186/s40168-019-0768-5	10.46936/10.25585/60000737
IMG_VR_1008	IMGVR_UViG_3300013285_000420|3300013285|Ga0136642_1000288	IMG_VR v3	Metagenome	3300013285	Linear	28710	Seed	IMG_VR_1008	Near-complete	ATPase MCP Penton PRO	Group 005	Large virophages	Maveriviricetes;Priklausovirales;Gulliviroviridae	10.1093/nar/gkaa946 10.1186/s40168-019-0768-5	10.46936/10.25585/60001045
IMG_VR_1009	IMGVR_UViG_3300013286_000383|3300013286|Ga0136641_1000158	IMG_VR v3	Metagenome	3300013286	Linear	28754	Seed	IMG_VR_1009	Near-complete	ATPase MCP Penton PRO	Group 005	Large virophages	Maveriviricetes;Priklausovirales;Gulliviroviridae	10.1093/nar/gkaa946 10.1186/s40168-019-0768-5	10.46936/10.25585/60001045
IMG_VR_1010	IMGVR_UViG_3300013286_000384|3300013286|Ga0136641_1000185	IMG_VR v3	Metagenome	3300013286	Linear	26940	Seed	IMG_VR_1010	Near-complete	ATPase MCP Penton PRO	NA	NA	Maveriviricetes;Unclassified	10.1093/nar/gkaa946 10.1186/s40168-019-0768-5	10.46936/10.25585/60001045
IMG_VR_1011	IMGVR_UViG_3300013286_000386|3300013286|Ga0136641_1001342	IMG_VR v3	Metagenome	3300013286	Linear	10350	Seed	IMG_VR_1011	Partial	MCP Penton PRO	NA	NA	Maveriviricetes;Priklausovirales;Gulliviroviridae	10.1093/nar/gkaa946 10.1186/s40168-019-0768-5	10.46936/10.25585/60001045
IMG_VR_1012	IMGVR_UViG_3300013286_000389|3300013286|Ga0136641_1004585	IMG_VR v3	Metagenome	3300013286	Linear	5161	Seed	IMG_VR_1012	Partial	MCP Penton PRO	NA	NA	Maveriviricetes;Priklausovirales;Burtonviroviridae	10.1093/nar/gkaa946 10.1186/s40168-019-0768-5	10.46936/10.25585/60001045
IMG_VR_1013	IMGVR_UViG_3300013800_000293|3300013800|Ga0119898_1000951	IMG_VR v3	Metagenome	3300013800	Linear	5477	Seed	IMG_VR_1013	Partial	ATPase MCP PRO	NA	NA	Maveriviricetes;Unclassified	10.1093/nar/gkaa946
IMG_VR_1014	IMGVR_UViG_3300014050_000611|3300014050|Ga0119952_1000747	IMG_VR v3	Metagenome	3300014050	Linear	20751	Seed	IMG_VR_1014	Partial	ATPase MCP Penton PRO	NA	NA	Maveriviricetes;Unclassified	10.1093/nar/gkaa946 10.1186/s40168-019-0768-5
IMG_VR_1015	IMGVR_UViG_3300014169_000054|3300014169|Ga0181531_10005234	IMG_VR v3	Metagenome	3300014169	Linear	7705	Clustered	IMG_VR_1029	NA	NA	NA	NA	NA	10.1093/nar/gkaa946	10.46936/10.25585/60001027
IMG_VR_1016	IMGVR_UViG_3300014204_002218|3300014204|Ga0172381_10002270	IMG_VR v3	Metagenome	3300014204	DTR	21312	Seed	IMG_VR_1016	Complete	ATPase MCP Penton PRO	Group 002	NA	Maveriviricetes;Unclassified	10.1093/nar/gkaa946 10.1186/s40168-019-0768-5	10.46936/10.25585/60000798
IMG_VR_1017	IMGVR_UViG_3300014204_002219|3300014204|Ga0172381_10011684	IMG_VR v3	Metagenome	3300014204	Linear	8336	Seed	IMG_VR_1017	Partial	ATPase MCP Penton PRO	NA	NA	Maveriviricetes;Unclassified	10.1093/nar/gkaa946 10.1186/s40168-019-0768-5	10.46936/10.25585/60000798
IMG_VR_1018	IMGVR_UViG_3300014204_002220|3300014204|Ga0172381_10013970	IMG_VR v3	Metagenome	3300014204	Linear	7517	Seed	IMG_VR_1018	Partial	MCP Penton PRO	NA	NA	Maveriviricetes;Mividavirales;Sputniviroviridae	10.1093/nar/gkaa946 10.1186/s40168-019-0768-5	10.46936/10.25585/60000798
IMG_VR_1019	IMGVR_UViG_3300014205_001202|3300014205|Ga0172380_10008076	IMG_VR v3	Metagenome	3300014205	Linear	11663	Seed	IMG_VR_1019	Partial	ATPase MCP Penton PRO	NA	NA	Maveriviricetes;Unclassified	10.1093/nar/gkaa946 10.1186/s40168-019-0768-5	10.46936/10.25585/60000798
IMG_VR_1020	IMGVR_UViG_3300014205_001708|3300014205|Ga0172380_10013798	IMG_VR v3	Metagenome	3300014205	Linear	8031	Seed	IMG_VR_1020	Partial	ATPase MCP Penton PRO	NA	NA	Maveriviricetes;Mividavirales;Sputniviroviridae	10.1093/nar/gkaa946 10.1186/s40168-019-0768-5	10.46936/10.25585/60000798
IMG_VR_1021	IMGVR_UViG_3300014492_000042|3300014492|Ga0182013_10004507	IMG_VR v3	Metagenome	3300014492	Linear	16677	Seed	IMG_VR_1021	Near-complete	ATPase MCP Penton PRO	NA	NA	Maveriviricetes;Unclassified	10.1038/s41586-018-0338-1 10.1093/nar/gkaa946 10.1186/s40168-019-0768-5	10.46936/fics.proj.2016.49521/60006018
IMG_VR_1022	IMGVR_UViG_3300014492_000073|3300014492|Ga0182013_10004328	IMG_VR v3	Metagenome	3300014492	DTR	17013	Seed	IMG_VR_1022	Complete	ATPase MCP Penton PRO	Group 002	Sputnik virophages	Maveriviricetes;Mividavirales;Sputniviroviridae	10.1038/s41586-018-0338-1 10.1093/nar/gkaa946 10.1186/s40168-019-0768-5	10.46936/fics.proj.2016.49521/60006018
IMG_VR_1023	IMGVR_UViG_3300014493_000072|3300014493|Ga0182016_10003510	IMG_VR v3	Metagenome	3300014493	Linear	17877	Clustered	IMG_VR_1395	NA	NA	NA	NA	NA	10.1038/s41586-018-0338-1 10.1093/nar/gkaa946 10.1186/s40168-019-0768-5	10.46936/fics.proj.2016.49521/60006018
IMG_VR_1024	IMGVR_UViG_3300014493_000073|3300014493|Ga0182016_10003760	IMG_VR v3	Metagenome	3300014493	DTR	17013	Clustered	IMG_VR_1022	NA	NA	NA	NA	NA	10.1038/s41586-018-0338-1 10.1093/nar/gkaa946 10.1186/s40168-019-0768-5	10.46936/fics.proj.2016.49521/60006018
IMG_VR_1025	IMGVR_UViG_3300014499_000089|3300014499|Ga0182012_10003368	IMG_VR v3	Metagenome	3300014499	DTR	16941	Clustered	IMG_VR_1022	NA	NA	NA	NA	NA	10.1038/s41586-018-0338-1 10.1093/nar/gkaa946 10.1186/s40168-019-0768-5	10.46936/fics.proj.2016.49521/60006018
IMG_VR_1026	IMGVR_UViG_3300014499_000090|3300014499|Ga0182012_10004034	IMG_VR v3	Metagenome	3300014499	Linear	15471	Seed	IMG_VR_1026	Partial	ATPase MCP Penton PRO	NA	NA	Maveriviricetes;Mividavirales;Sputniviroviridae	10.1038/s41586-018-0338-1 10.1093/nar/gkaa946 10.1186/s40168-019-0768-5	10.46936/fics.proj.2016.49521/60006018
IMG_VR_1027	IMGVR_UViG_3300014501_000145|3300014501|Ga0182024_10038318	IMG_VR v3	Metagenome	3300014501	Linear	7967	Seed	IMG_VR_1027	Partial	ATPase MCP Penton PRO	NA	NA	Maveriviricetes;Mividavirales;Sputniviroviridae	10.1038/s41586-018-0338-1 10.1093/nar/gkaa946	10.46936/fics.proj.2016.49521/60006018
IMG_VR_1028	IMGVR_UViG_3300014654_000055|3300014654|Ga0181525_10003086	IMG_VR v3	Metagenome	3300014654	Linear	13315	Seed	IMG_VR_1028	Partial	ATPase MCP Penton PRO	NA	NA	Maveriviricetes;Mividavirales;Sputniviroviridae	10.1093/nar/gkaa946 10.1186/s40168-019-0768-5	10.46936/10.25585/60001027
IMG_VR_1029	IMGVR_UViG_3300014654_000056|3300014654|Ga0181525_10003147	IMG_VR v3	Metagenome	3300014654	Linear	13205	Seed	IMG_VR_1029	Partial	ATPase MCP Penton PRO	NA	NA	Maveriviricetes;Mividavirales;Sputniviroviridae	10.1093/nar/gkaa946 10.1186/s40168-019-0768-5	10.46936/10.25585/60001027
IMG_VR_1033	IMGVR_UViG_3300014814_000024|3300014814|Ga0119849_1001033	IMG_VR v3	Metagenome	3300014814	Linear	18962	Seed	IMG_VR_1033	Partial	ATPase MCP Penton PRO	NA	NA	Maveriviricetes;Unclassified	10.1021/acs.est.6b04477 10.1093/nar/gkaa946
IMG_VR_1034	IMGVR_UViG_3300014818_000118|3300014818|Ga0134300_1003182	IMG_VR v3	Metagenome	3300014818	Linear	10337	Seed	IMG_VR_1034	Partial	ATPase MCP Penton PRO	NA	NA	Maveriviricetes;Priklausovirales;Omnilimnoviroviridae	10.1093/nar/gkaa946 10.1186/s40168-019-0768-5
IMG_VR_1035	IMGVR_UViG_3300014818_000119|3300014818|Ga0134300_1004965	IMG_VR v3	Metagenome	3300014818	Linear	6464	Seed	IMG_VR_1035	Partial	ATPase MCP Penton PRO	NA	NA	Maveriviricetes;Unclassified	10.1093/nar/gkaa946 10.1186/s40168-019-0768-5
IMG_VR_1036	IMGVR_UViG_3300014818_000120|3300014818|Ga0134300_1005423	IMG_VR v3	Metagenome	3300014818	Linear	5899	Seed	IMG_VR_1036	Partial	ATPase MCP Penton PRO	NA	NA	Maveriviricetes;Priklausovirales;Omnilimnoviroviridae	10.1093/nar/gkaa946 10.1186/s40168-019-0768-5
IMG_VR_1037	IMGVR_UViG_3300014819_000304|3300014819|Ga0119954_1000411	IMG_VR v3	Metagenome	3300014819	Linear	15421	Seed	IMG_VR_1037	Partial	MCP Penton PRO	NA	NA	Maveriviricetes;Priklausovirales;Omnilimnoviroviridae	10.1093/nar/gkaa946 10.1186/s40168-019-0768-5
IMG_VR_1038	IMGVR_UViG_3300014819_000305|3300014819|Ga0119954_1000484	IMG_VR v3	Metagenome	3300014819	Linear	13961	Seed	IMG_VR_1038	Partial	ATPase MCP Penton	NA	NA	Maveriviricetes;Unclassified	10.1093/nar/gkaa946 10.1186/s40168-019-0768-5
IMG_VR_1039	IMGVR_UViG_3300014819_000306|3300014819|Ga0119954_1000547	IMG_VR v3	Metagenome	3300014819	Linear	13174	Seed	IMG_VR_1039	Partial	ATPase MCP Penton PRO	NA	NA	Maveriviricetes;Unclassified	10.1093/nar/gkaa946 10.1186/s40168-019-0768-5
IMG_VR_1040	IMGVR_UViG_3300014819_000307|3300014819|Ga0119954_1000767	IMG_VR v3	Metagenome	3300014819	Linear	11070	Seed	IMG_VR_1040	Partial	ATPase MCP Penton PRO	NA	NA	Maveriviricetes;Unclassified	10.1093/nar/gkaa946 10.1186/s40168-019-0768-5
IMG_VR_1041	IMGVR_UViG_3300014819_000308|3300014819|Ga0119954_1001212	IMG_VR v3	Metagenome	3300014819	Linear	8660	Clustered	MAG_bacterium_isolate_WB4_3_0878_contig_100_31	NA	NA	NA	NA	NA	10.1093/nar/gkaa946 10.1186/s40168-019-0768-5
IMG_VR_1042	IMGVR_UViG_3300014819_000309|3300014819|Ga0119954_1001533	IMG_VR v3	Metagenome	3300014819	Linear	7594	Seed	IMG_VR_1042	Partial	ATPase MCP Penton PRO	NA	NA	Maveriviricetes;Unclassified	10.1093/nar/gkaa946 10.1186/s40168-019-0768-5
IMG_VR_1043	IMGVR_UViG_3300014838_000108|3300014838|Ga0182030_10010675	IMG_VR v3	Metagenome	3300014838	Linear	18610	Seed	IMG_VR_1043	Near-complete	ATPase MCP Penton PRO	NA	NA	Maveriviricetes;Mividavirales;Sputniviroviridae	10.1038/s41586-018-0338-1 10.1093/nar/gkaa946	10.46936/fics.proj.2016.49521/60006018
IMG_VR_1044	IMGVR_UViG_3300014838_000117|3300014838|Ga0182030_10012331	IMG_VR v3	Metagenome	3300014838	DTR	17013	Clustered	IMG_VR_1022	NA	NA	NA	NA	NA	10.1038/s41586-018-0338-1 10.1093/nar/gkaa946	10.46936/fics.proj.2016.49521/60006018
IMG_VR_1045	IMGVR_UViG_3300014838_000148|3300014838|Ga0182030_10018256	IMG_VR v3	Metagenome	3300014838	Linear	13464	Seed	IMG_VR_1045	Partial	ATPase MCP Penton PRO	NA	NA	Maveriviricetes;Mividavirales;Sputniviroviridae	10.1038/s41586-018-0338-1 10.1093/nar/gkaa946	10.46936/fics.proj.2016.49521/60006018
IMG_VR_1064	IMGVR_UViG_3300017788_000004|3300017788|Ga0169931_10002883	IMG_VR v3	Metagenome	3300017788	DTR	27606	Clustered	PE_308	NA	NA	NA	NA	NA	10.1093/nar/gkaa946	10.46936/10.25585/60000876
IMG_VR_1065	IMGVR_UViG_3300017788_000283|3300017788|Ga0169931_10006883	IMG_VR v3	Metagenome	3300017788	Linear	17000	Seed	IMG_VR_1065	Partial	ATPase MCP Penton PRO	NA	NA	Maveriviricetes;Unclassified	10.1093/nar/gkaa946	10.46936/10.25585/60000876
IMG_VR_1066	IMGVR_UViG_3300017940_000042|3300017940|Ga0187853_10002131	IMG_VR v3	Metagenome	3300017940	Linear	16905	Seed	IMG_VR_1066	Near-complete	ATPase MCP Penton PRO	Group 002	Sputnik virophages	Maveriviricetes;Mividavirales;Sputniviroviridae	10.1093/nar/gkaa946 10.1186/s40168-021-01156-0	10.46936/10.25585/60001027
IMG_VR_1067	IMGVR_UViG_3300017963_000712|3300017963|Ga0180437_10003067	IMG_VR v3	Metagenome	3300017963	Linear	25433	Clustered	IMG_VR_1071	NA	NA	NA	NA	NA	10.1093/nar/gkaa946	10.46936/10.25585/60000668
IMG_VR_1068	IMGVR_UViG_3300017963_000798|3300017963|Ga0180437_10003822	IMG_VR v3	Metagenome	3300017963	DTR	21909	Seed	IMG_VR_1068	Complete	ATPase MCP Penton PRO	Group 002	Sputnik virophages	Maveriviricetes;Mividavirales;Sputniviroviridae	10.1093/nar/gkaa946	10.46936/10.25585/60000668
IMG_VR_1069	IMGVR_UViG_3300017963_000932|3300017963|Ga0180437_10005156	IMG_VR v3	Metagenome	3300017963	Linear	18031	Clustered	IMG_VR_1070	NA	NA	NA	NA	NA	10.1093/nar/gkaa946	10.46936/10.25585/60000668
IMG_VR_1070	IMGVR_UViG_3300017971_000183|3300017971|Ga0180438_10003911	IMG_VR v3	Metagenome	3300017971	DTR	21873	Seed	IMG_VR_1070	Complete	ATPase MCP Penton PRO	Group 002	Sputnik virophages	Maveriviricetes;Mividavirales;Sputniviroviridae	10.1093/nar/gkaa946	10.46936/10.25585/60000668
IMG_VR_1071	IMGVR_UViG_3300017971_000685|3300017971|Ga0180438_10002894	IMG_VR v3	Metagenome	3300017971	DTR	26833	Seed	IMG_VR_1071	Complete	ATPase MCP Penton PRO	Group 002	Sputnik virophages	Maveriviricetes;Mividavirales;Sputniviroviridae	10.1093/nar/gkaa946	10.46936/10.25585/60000668
IMG_VR_1072	IMGVR_UViG_3300017971_000804|3300017971|Ga0180438_10003897	IMG_VR v3	Metagenome	3300017971	DTR	21909	Clustered	IMG_VR_1068	NA	NA	NA	NA	NA	10.1093/nar/gkaa946	10.46936/10.25585/60000668
IMG_VR_1073	IMGVR_UViG_3300017989_000761|3300017989|Ga0180432_10008395	IMG_VR v3	Metagenome	3300017989	Linear	12884	Seed	IMG_VR_1073	Partial	NA	NA	NA	NA	10.1093/nar/gkaa946	10.46936/10.25585/60000668
IMG_VR_1074	IMGVR_UViG_3300017996_000051|3300017996|Ga0187891_1003142	IMG_VR v3	Metagenome	3300017996	Linear	11819	Clustered	IMG_VR_0672	NA	NA	NA	NA	NA	10.1093/nar/gkaa946 10.1186/s40168-021-01156-0	10.46936/10.25585/60001027
IMG_VR_1075	IMGVR_UViG_3300018013_000071|3300018013|Ga0187873_1006443	IMG_VR v3	Metagenome	3300018013	Linear	7600	Clustered	IMG_VR_1066	NA	NA	NA	NA	NA	10.1093/nar/gkaa946 10.1186/s40168-021-01156-0	10.46936/10.25585/60001027
IMG_VR_1076	IMGVR_UViG_3300018014_000025|3300018014|Ga0187860_1002293	IMG_VR v3	Metagenome	3300018014	Linear	16028	Clustered	IMG_VR_1080	NA	NA	NA	NA	NA	10.1093/nar/gkaa946 10.1186/s40168-021-01156-0	10.46936/10.25585/60001027
IMG_VR_1077	IMGVR_UViG_3300018017_000036|3300018017|Ga0187872_10003354	IMG_VR v3	Metagenome	3300018017	Linear	12962	Clustered	IMG_VR_1078	NA	NA	NA	NA	NA	10.1093/nar/gkaa946 10.1186/s40168-021-01156-0	10.46936/10.25585/60001027
IMG_VR_1078	IMGVR_UViG_3300018019_000061|3300018019|Ga0187874_10002356	IMG_VR v3	Metagenome	3300018019	Linear	14586	Seed	IMG_VR_1078	Partial	ATPase MCP Penton PRO	NA	NA	Maveriviricetes;Mividavirales;Sputniviroviridae	10.1093/nar/gkaa946 10.1186/s40168-021-01156-0	10.46936/10.25585/60001027
IMG_VR_1079	IMGVR_UViG_3300018022_000002|3300018022|Ga0187864_10002390	IMG_VR v3	Metagenome	3300018022	DTR	16265	Seed	IMG_VR_1079	Complete	ATPase MCP Penton PRO	NA	NA	Maveriviricetes;Mividavirales;Sputniviroviridae	10.1093/nar/gkaa946 10.1186/s40168-021-01156-0	10.46936/10.25585/60001027
IMG_VR_1080	IMGVR_UViG_3300018022_000016|3300018022|Ga0187864_10002007	IMG_VR v3	Metagenome	3300018022	Linear	18393	Seed	IMG_VR_1080	Near-complete	ATPase MCP Penton PRO	Group 002	Sputnik virophages	Maveriviricetes;Mividavirales;Sputniviroviridae	10.1093/nar/gkaa946 10.1186/s40168-021-01156-0	10.46936/10.25585/60001027
IMG_VR_1081	IMGVR_UViG_3300018022_000023|3300018022|Ga0187864_10003073	IMG_VR v3	Metagenome	3300018022	Linear	13913	Clustered	IMG_VR_1078	NA	NA	NA	NA	NA	10.1093/nar/gkaa946 10.1186/s40168-021-01156-0	10.46936/10.25585/60001027
IMG_VR_1082	IMGVR_UViG_3300018026_000083|3300018026|Ga0187857_10008837	IMG_VR v3	Metagenome	3300018026	Linear	6482	Clustered	IMG_VR_1066	NA	NA	NA	NA	NA	10.1093/nar/gkaa946 10.1186/s40168-021-01156-0	10.46936/10.25585/60001027
IMG_VR_1083	IMGVR_UViG_3300018426_000510|3300018426|Ga0181566_10004459	IMG_VR v3	Metagenome	3300018426	Linear	11384	Seed	IMG_VR_1083	Partial	ATPase MCP Penton PRO	NA	NA	Maveriviricetes;Priklausovirales;Omnilimnoviroviridae	10.1093/nar/gkaa946 https://trace.tennessee.edu/utk_graddiss/5051	10.46936/10.25585/60000711
IMG_VR_1084	IMGVR_UViG_3300019093_000126|3300019093|Ga0187843_10001554	IMG_VR v3	Metagenome	3300019093	Linear	14377	Seed	IMG_VR_1084	Partial	MCP Penton PRO	NA	NA	Maveriviricetes;Priklausovirales;Omnilimnoviroviridae	10.1002/lno.11306 10.1093/nar/gkaa946	10.46936/10.25585/60000947
IMG_VR_1085	IMGVR_UViG_3300019487_000144|3300019487|Ga0187893_10009394	IMG_VR v3	Metagenome	3300019487	DTR	14915	Seed	IMG_VR_1085	Complete	ATPase MCP Penton PRO	Group 002	Sputnik virophages	Maveriviricetes;Mividavirales;Sputniviroviridae	10.1093/nar/gkaa946	10.46936/10.25585/60000621
IMG_VR_1086	IMGVR_UViG_3300019871_000006|3300019871|Ga0193702_1000168	IMG_VR v3	Metagenome	3300019871	Linear	25992	Seed	IMG_VR_1086	Near-complete	ATPase MCP Penton PRO	Group 002	Sputnik virophages	Maveriviricetes;Mividavirales;Sputniviroviridae	10.1093/nar/gkaa946 10.2136/vzj2018.03.0061	10.46936/10.25585/60000753
IMG_VR_1087	IMGVR_UViG_3300019872_000029|3300019872|Ga0193754_1000044	IMG_VR v3	Metagenome	3300019872	Linear	11783	Clustered	IMG_VR_1091	NA	NA	NA	NA	NA	10.1093/nar/gkaa946 10.2136/vzj2018.03.0061	10.46936/10.25585/60000753
IMG_VR_1088	IMGVR_UViG_3300019874_000029|3300019874|Ga0193744_1000212	IMG_VR v3	Metagenome	3300019874	Linear	15919	Seed	IMG_VR_1088	Partial	ATPase MCP Penton PRO	NA	NA	Maveriviricetes;Unclassified	10.1093/nar/gkaa946 10.2136/vzj2018.03.0061	10.46936/10.25585/60000753
IMG_VR_1089	IMGVR_UViG_3300019886_000045|3300019886|Ga0193727_1001364	IMG_VR v3	Metagenome	3300019886	Linear	10068	Seed	IMG_VR_1089	Partial	ATPase MCP Penton PRO	NA	NA	Maveriviricetes;Mividavirales;Sputniviroviridae	10.1093/nar/gkaa946 10.2136/vzj2018.03.0061	10.46936/10.25585/60000753
IMG_VR_1090	IMGVR_UViG_3300020000_000145|3300020000|Ga0193692_1001220	IMG_VR v3	Metagenome	3300020000	Linear	6747	Seed	IMG_VR_1090	Partial	ATPase MCP Penton PRO	NA	NA	Maveriviricetes;Mividavirales;Sputniviroviridae	10.1093/nar/gkaa946 10.2136/vzj2018.03.0061	10.46936/10.25585/60000753
IMG_VR_1091	IMGVR_UViG_3300020004_000009|3300020004|Ga0193755_1000268	IMG_VR v3	Metagenome	3300020004	Linear	14726	Seed	IMG_VR_1091	Partial	ATPase MCP Penton PRO	NA	NA	Maveriviricetes;Mividavirales;Sputniviroviridae	10.1093/nar/gkaa946 10.2136/vzj2018.03.0061	10.46936/10.25585/60000753
IMG_VR_1092	IMGVR_UViG_3300020048_000626|3300020048|Ga0207193_1004013	IMG_VR v3	Metagenome	3300020048	Linear	24276	Seed	IMG_VR_1092	Partial	ATPase MCP Penton PRO	NA	NA	Maveriviricetes;Priklausovirales;Dishuiviroviridae	10.1093/nar/gkaa946
IMG_VR_1093	IMGVR_UViG_3300020048_000673|3300020048|Ga0207193_1004578	IMG_VR v3	Metagenome	3300020048	Linear	22478	Seed	IMG_VR_1093	Partial	ATPase MCP Penton PRO	NA	NA	Maveriviricetes;Priklausovirales;Omnilimnoviroviridae	10.1093/nar/gkaa946
IMG_VR_1094	IMGVR_UViG_3300020048_000685|3300020048|Ga0207193_1004750	IMG_VR v3	Metagenome	3300020048	Linear	21975	Seed	IMG_VR_1094	Partial	ATPase MCP Penton	NA	NA	Maveriviricetes;Priklausovirales;Omnilimnoviroviridae	10.1093/nar/gkaa946
IMG_VR_1095	IMGVR_UViG_3300020048_000956|3300020048|Ga0207193_1008333	IMG_VR v3	Metagenome	3300020048	Linear	15183	Seed	IMG_VR_1095	Partial	ATPase MCP Penton PRO	NA	NA	Maveriviricetes;Unclassified	10.1093/nar/gkaa946
IMG_VR_1097	IMGVR_UViG_3300020165_000254|3300020165|Ga0206125_10002857	IMG_VR v3	Metagenome	3300020165	Linear	17484	Clustered	IMG_VR_1106	NA	NA	NA	NA	NA	10.1038/s41396-021-00928-8 10.1093/nar/gkaa946	10.46936/10.25585/60000792
IMG_VR_1098	IMGVR_UViG_3300020511_000003|3300020511|Ga0208593_1000023	IMG_VR v3	Metagenome	3300020511	Linear	26164	Clustered	IMG_VR_0102	NA	NA	NA	NA	NA	10.1093/nar/gkaa946 10.7717/peerj.6075	10.46936/10.25585/60000533
IMG_VR_1099	IMGVR_UViG_3300020544_000031|3300020544|Ga0207937_1001092	IMG_VR v3	Metagenome	3300020544	Linear	9035	Clustered	IMG_VR_0105	NA	NA	NA	NA	NA	10.1093/nar/gkaa946 10.7717/peerj.6075	10.46936/10.25585/60000533
IMG_VR_1100	IMGVR_UViG_3300020548_000039|3300020548|Ga0208856_1000284	IMG_VR v3	Metagenome	3300020548	DTR	20751	Clustered	IMG_VR_0107	NA	NA	NA	NA	NA	10.1093/nar/gkaa946 10.7717/peerj.6075	10.46936/10.25585/60000533
IMG_VR_1101	IMGVR_UViG_3300020551_000021|3300020551|Ga0208360_1000120	IMG_VR v3	Metagenome	3300020551	Linear	23607	Clustered	IMG_VR_0102	NA	NA	NA	NA	NA	10.1093/nar/gkaa946 10.7717/peerj.6075	10.46936/10.25585/60000533
IMG_VR_1102	IMGVR_UViG_3300020557_000030|3300020557|Ga0208231_1000118	IMG_VR v3	Metagenome	3300020557	Linear	24107	Seed	IMG_VR_1102	Partial	ATPase MCP Penton PRO	NA	NA	Maveriviricetes;Priklausovirales;Dishuiviroviridae	10.1093/nar/gkaa946 10.7717/peerj.6075	10.46936/10.25585/60000533
IMG_VR_1103	IMGVR_UViG_3300020569_000019|3300020569|Ga0208229_1000201	IMG_VR v3	Metagenome	3300020569	Linear	15343	Clustered	IMG_VR_0105	NA	NA	NA	NA	NA	10.1093/nar/gkaa946 10.7717/peerj.6075	10.46936/10.25585/60000533
IMG_VR_1104	IMGVR_UViG_3300020578_000393|3300020578|Ga0194129_10002814	IMG_VR v3	Metagenome	3300020578	Linear	25260	Seed	IMG_VR_1104	Near-complete	ATPase MCP Penton PRO	Group 004	SW01 virophages	Maveriviricetes;Priklausovirales;Dishuiviroviridae	10.1038/s41396-021-00898-x 10.1093/nar/gkaa946	10.46936/10.25585/60000771
IMG_VR_1105	IMGVR_UViG_3300020579_000051|3300020579|Ga0210407_10006012	IMG_VR v3	Metagenome	3300020579	Linear	9322	Clustered	IMG_VR_1125	NA	NA	NA	NA	NA	10.1093/nar/gkaa946	10.46936/fics.proj.2016.49483/60006003
IMG_VR_1106	IMGVR_UViG_3300020595_000220|3300020595|Ga0206126_10002204	IMG_VR v3	Metagenome	3300020595	Linear	21942	Seed	IMG_VR_1106	Partial	ATPase MCP Penton PRO	NA	NA	Maveriviricetes;Unclassified	10.1038/s41396-021-00928-8 10.1093/nar/gkaa946	10.46936/10.25585/60000792
IMG_VR_1107	IMGVR_UViG_3300020686_000011|3300020686|Ga0214194_100078	IMG_VR v3	Metagenome	3300020686	Linear	20609	Clustered	IMG_VR_1118	NA	NA	NA	NA	NA	10.1038/ismej.2015.241 10.1093/nar/gkaa946 10.7717/peerj.6075	10.46936/10.25585/60000533
IMG_VR_1108	IMGVR_UViG_3300021088_000035|3300021088|Ga0210404_10000551	IMG_VR v3	Metagenome	3300021088	Linear	18925	Seed	IMG_VR_1108	Near-complete	ATPase MCP Penton PRO	Group 002	Sputnik virophages	Maveriviricetes;Mividavirales;Sputniviroviridae	10.1093/nar/gkaa946	10.46936/fics.proj.2016.49483/60006003
IMG_VR_1109	IMGVR_UViG_3300021090_000087|3300021090|Ga0210377_10000879	IMG_VR v3	Metagenome	3300021090	Linear	28448	Seed	IMG_VR_1109	Near-complete	ATPase MCP Penton PRO	Group 002	Sputnik virophages	Maveriviricetes;Mividavirales;Sputniviroviridae	10.1002/ece3.5254 10.1093/nar/gkaa946	10.46936/10.25585/60000753
IMG_VR_1110	IMGVR_UViG_3300021091_000318|3300021091|Ga0194133_10002490	IMG_VR v3	Metagenome	3300021091	Linear	28245	Seed	IMG_VR_1110	Near-complete	ATPase MCP Penton PRO	Group 004	SW01 virophages	Maveriviricetes;Priklausovirales;Dishuiviroviridae	10.1038/s41396-021-00898-x 10.1093/nar/gkaa946	10.46936/10.25585/60000771
IMG_VR_1111	IMGVR_UViG_3300021091_000391|3300021091|Ga0194133_10002939	IMG_VR v3	Metagenome	3300021091	Linear	25068	Clustered	IMG_VR_1104	NA	NA	NA	NA	NA	10.1038/s41396-021-00898-x 10.1093/nar/gkaa946	10.46936/10.25585/60000771
IMG_VR_1112	IMGVR_UViG_3300021120_000017|3300021120|Ga0214188_100988	IMG_VR v3	Metagenome	3300021120	Linear	6631	Seed	IMG_VR_1112	Partial	MCP Penton PRO	NA	NA	Maveriviricetes;Priklausovirales;Omnilimnoviroviridae	10.1038/ismej.2015.241 10.1093/nar/gkaa946 10.7717/peerj.6075	10.46936/10.25585/60000533
IMG_VR_1113	IMGVR_UViG_3300021130_000032|3300021130|Ga0214180_1000314	IMG_VR v3	Metagenome	3300021130	Linear	18127	Seed	IMG_VR_1113	Partial	ATPase MCP Penton PRO	NA	NA	Maveriviricetes;Priklausovirales;Omnilimnoviroviridae	10.1038/ismej.2015.241 10.1093/nar/gkaa946 10.7717/peerj.6075	10.46936/10.25585/60000533
IMG_VR_1114	IMGVR_UViG_3300021131_000078|3300021131|Ga0214206_1000174	IMG_VR v3	Metagenome	3300021131	Linear	17753	Seed	IMG_VR_1114	Partial	ATPase MCP Penton	NA	NA	Maveriviricetes;Priklausovirales;Omnilimnoviroviridae	10.1038/ismej.2015.241 10.1093/nar/gkaa946 10.7717/peerj.6075	10.46936/10.25585/60000533
IMG_VR_1115	IMGVR_UViG_3300021138_000191|3300021138|Ga0214164_1000648	IMG_VR v3	Metagenome	3300021138	Linear	22354	Clustered	IMG_VR_1118	NA	NA	NA	NA	NA	10.1038/ismej.2015.241 10.1093/nar/gkaa946 10.7717/peerj.6075	10.46936/10.25585/60000533
IMG_VR_1116	IMGVR_UViG_3300021138_000586|3300021138|Ga0214164_1002651	IMG_VR v3	Metagenome	3300021138	Linear	9024	Clustered	PE_022	NA	NA	NA	NA	NA	10.1038/ismej.2015.241 10.1093/nar/gkaa946 10.7717/peerj.6075	10.46936/10.25585/60000533
IMG_VR_1117	IMGVR_UViG_3300021139_000113|3300021139|Ga0214166_1000274	IMG_VR v3	Metagenome	3300021139	Linear	27437	Seed	IMG_VR_1117	Near-complete	ATPase MCP Penton PRO	Group 003	Aquatic virophages 2	Maveriviricetes;Priklausovirales;Burtonviroviridae	10.1038/ismej.2015.241 10.1093/nar/gkaa946 10.7717/peerj.6075	10.46936/10.25585/60000533
IMG_VR_1118	IMGVR_UViG_3300021142_000167|3300021142|Ga0214192_1000460	IMG_VR v3	Metagenome	3300021142	Linear	25253	Seed	IMG_VR_1118	Near-complete	ATPase MCP Penton PRO	Group 003	Aquatic virophages 2	Maveriviricetes;Priklausovirales;Burtonviroviridae	10.1038/ismej.2015.241 10.1093/nar/gkaa946 10.7717/peerj.6075	10.46936/10.25585/60000533
IMG_VR_1119	IMGVR_UViG_3300021168_000012|3300021168|Ga0210406_10003258	IMG_VR v3	Metagenome	3300021168	DTR	17800	Seed	IMG_VR_1119	Complete	ATPase MCP Penton PRO	Group 002	Sputnik virophages	Maveriviricetes;Mividavirales;Sputniviroviridae	10.1093/nar/gkaa946	10.46936/fics.proj.2016.49483/60006003
IMG_VR_1120	IMGVR_UViG_3300021354_000058|3300021354|Ga0194047_10001558	IMG_VR v3	Metagenome	3300021354	Linear	13878	Seed	IMG_VR_1120	Partial	ATPase MCP Penton PRO	NA	NA	Maveriviricetes;Mividavirales;Sputniviroviridae	10.1038/s41396-020-0725-0 10.1093/nar/gkaa946	10.46936/10.25585/60000734
IMG_VR_1121	IMGVR_UViG_3300021376_000272|3300021376|Ga0194130_10002278	IMG_VR v3	Metagenome	3300021376	Linear	28179	Clustered	IMG_VR_1110	NA	NA	NA	NA	NA	10.1038/s41396-021-00898-x 10.1093/nar/gkaa946	10.46936/10.25585/60000771
IMG_VR_1122	IMGVR_UViG_3300021420_000155|3300021420|Ga0210394_10006293	IMG_VR v3	Metagenome	3300021420	Linear	12888	Seed	IMG_VR_1122	Partial	MCP Penton PRO	NA	NA	Maveriviricetes;Mividavirales;Sputniviroviridae	10.1093/nar/gkaa946	10.46936/fics.proj.2016.49483/60006003
IMG_VR_1123	IMGVR_UViG_3300021438_000076|3300021438|Ga0213920_1000796	IMG_VR v3	Metagenome	3300021438	ITR	20412	Seed	IMG_VR_1123	Complete	ATPase MCP Penton PRO	Group 002	Sputnik virophages	Maveriviricetes;Mividavirales;Sputniviroviridae	10.1093/nar/gkaa946	10.46936/10.25585/60000733
IMG_VR_1124	IMGVR_UViG_3300021477_000050|3300021477|Ga0210398_10015895	IMG_VR v3	Metagenome	3300021477	Linear	6523	Seed	IMG_VR_1124	Partial	MCP Penton PRO	NA	NA	Maveriviricetes;Mividavirales;Sputniviroviridae	10.1093/nar/gkaa946	10.46936/fics.proj.2016.49483/60006003
IMG_VR_1125	IMGVR_UViG_3300021478_000148|3300021478|Ga0210402_10003601	IMG_VR v3	Metagenome	3300021478	Linear	14441	Seed	IMG_VR_1125	Partial	ATPase MCP Penton PRO	NA	NA	Maveriviricetes;Mividavirales;Sputniviroviridae	10.1093/nar/gkaa946	10.46936/fics.proj.2016.49483/60006003
IMG_VR_1128	IMGVR_UViG_3300022752_000489|3300022752|Ga0214917_10002966	IMG_VR v3	Metagenome	3300022752	Linear	20138	Seed	IMG_VR_1128	Partial	ATPase MCP Penton PRO	NA	NA	Maveriviricetes;Unclassified	10.1093/nar/gkaa946 10.1111/1462-2920.15112	10.46936/10.25585/60000938
IMG_VR_1129	IMGVR_UViG_3300022752_000528|3300022752|Ga0214917_10003238	IMG_VR v3	Metagenome	3300022752	Linear	19032	Seed	IMG_VR_1129	Partial	ATPase MCP Penton PRO	NA	NA	Maveriviricetes;Priklausovirales;Dishuiviroviridae	10.1093/nar/gkaa946 10.1111/1462-2920.15112	10.46936/10.25585/60000938
IMG_VR_1130	IMGVR_UViG_3300022752_001033|3300022752|Ga0214917_10007836	IMG_VR v3	Metagenome	3300022752	Linear	10679	Seed	IMG_VR_1130	Partial	MCP Penton PRO	NA	NA	Maveriviricetes;Priklausovirales;Burtonviroviridae	10.1093/nar/gkaa946 10.1111/1462-2920.15112	10.46936/10.25585/60000938
IMG_VR_1131	IMGVR_UViG_3300022843_000117|3300022843|Ga0222631_1000188	IMG_VR v3	Metagenome	3300022843	Linear	19224	Seed	IMG_VR_1131	Partial	ATPase MCP Penton PRO	NA	NA	Maveriviricetes;Priklausovirales;Omnilimnoviroviridae	10.1093/nar/gkaa946 10.1186/s40168-020-00889-8	10.46936/10.25585/60001034
IMG_VR_1132	IMGVR_UViG_3300023174_000558|3300023174|Ga0214921_10002909	IMG_VR v3	Metagenome	3300023174	Linear	27030	Seed	IMG_VR_1132	Near-complete	ATPase MCP Penton PRO	Group 004	NA	Maveriviricetes;Unclassified	10.1093/nar/gkaa946 10.1111/1462-2920.15112	10.46936/10.25585/60000938
IMG_VR_1133	IMGVR_UViG_3300023174_000588|3300023174|Ga0214921_10003134	IMG_VR v3	Metagenome	3300023174	Linear	25801	Seed	IMG_VR_1133	Near-complete	ATPase MCP Penton PRO	Group 003	Aquatic virophages 2	Maveriviricetes;Priklausovirales;Burtonviroviridae	10.1093/nar/gkaa946 10.1111/1462-2920.15112	10.46936/10.25585/60000938
IMG_VR_1134	IMGVR_UViG_3300023174_000694|3300023174|Ga0214921_10004023	IMG_VR v3	Metagenome	3300023174	DTR	21971	Seed	IMG_VR_1134	Complete	ATPase MCP Penton PRO	Group 001	Aquatic virophages 1	Maveriviricetes;Priklausovirales;Omnilimnoviroviridae	10.1093/nar/gkaa946 10.1111/1462-2920.15112	10.46936/10.25585/60000938
IMG_VR_1135	IMGVR_UViG_3300023174_000711|3300023174|Ga0214921_10004153	IMG_VR v3	Metagenome	3300023174	Linear	21591	Seed	IMG_VR_1135	Partial	ATPase MCP Penton PRO	NA	NA	Maveriviricetes;Unclassified	10.1093/nar/gkaa946 10.1111/1462-2920.15112	10.46936/10.25585/60000938
IMG_VR_1136	IMGVR_UViG_3300023174_000778|3300023174|Ga0214921_10004735	IMG_VR v3	Metagenome	3300023174	Linear	19775	Seed	IMG_VR_1136	Partial	ATPase MCP Penton PRO	NA	NA	Maveriviricetes;Unclassified	10.1093/nar/gkaa946 10.1111/1462-2920.15112	10.46936/10.25585/60000938
IMG_VR_1137	IMGVR_UViG_3300023174_000833|3300023174|Ga0214921_10005216	IMG_VR v3	Metagenome	3300023174	Linear	18499	Seed	IMG_VR_1137	Partial	ATPase MCP Penton PRO	NA	NA	Maveriviricetes;Unclassified	10.1093/nar/gkaa946 10.1111/1462-2920.15112	10.46936/10.25585/60000938
IMG_VR_1138	IMGVR_UViG_3300023174_000846|3300023174|Ga0214921_10005288	IMG_VR v3	Metagenome	3300023174	Linear	18337	Seed	IMG_VR_1138	Partial	ATPase MCP Penton PRO	NA	NA	Maveriviricetes;Priklausovirales;Burtonviroviridae	10.1093/nar/gkaa946 10.1111/1462-2920.15112	10.46936/10.25585/60000938
IMG_VR_1139	IMGVR_UViG_3300023179_000412|3300023179|Ga0214923_10001993	IMG_VR v3	Metagenome	3300023179	Linear	28014	Seed	IMG_VR_1139	Near-complete	ATPase MCP Penton PRO	Group 003	Aquatic virophages 2	Maveriviricetes;Priklausovirales;Burtonviroviridae	10.1093/nar/gkaa946 10.1111/1462-2920.15112	10.46936/10.25585/60000938
IMG_VR_1140	IMGVR_UViG_3300023179_000510|3300023179|Ga0214923_10002592	IMG_VR v3	Metagenome	3300023179	Linear	23780	Seed	IMG_VR_1140	Partial	ATPase MCP Penton PRO	NA	NA	Maveriviricetes;Unclassified	10.1093/nar/gkaa946 10.1111/1462-2920.15112	10.46936/10.25585/60000938
IMG_VR_1141	IMGVR_UViG_3300023179_000602|3300023179|Ga0214923_10003175	IMG_VR v3	Metagenome	3300023179	Linear	20881	Seed	IMG_VR_1141	Partial	ATPase MCP Penton PRO	NA	NA	Maveriviricetes;Priklausovirales;Dishuiviroviridae	10.1093/nar/gkaa946 10.1111/1462-2920.15112	10.46936/10.25585/60000938
IMG_VR_1142	IMGVR_UViG_3300023179_000638|3300023179|Ga0214923_10003385	IMG_VR v3	Metagenome	3300023179	Linear	20018	Seed	IMG_VR_1142	Partial	ATPase MCP Penton	NA	NA	Maveriviricetes;Priklausovirales;Omnilimnoviroviridae	10.1093/nar/gkaa946 10.1111/1462-2920.15112	10.46936/10.25585/60000938
IMG_VR_1143	IMGVR_UViG_3300023179_000655|3300023179|Ga0214923_10003502	IMG_VR v3	Metagenome	3300023179	Linear	19671	Seed	IMG_VR_1143	Partial	ATPase MCP Penton PRO	NA	NA	Maveriviricetes;Unclassified	10.1093/nar/gkaa946 10.1111/1462-2920.15112	10.46936/10.25585/60000938
IMG_VR_1144	IMGVR_UViG_3300023184_000662|3300023184|Ga0214919_10005024	IMG_VR v3	Metagenome	3300023184	Linear	19004	Seed	IMG_VR_1144	Partial	ATPase MCP Penton PRO	NA	NA	Maveriviricetes;Mividavirales;Sputniviroviridae	10.1093/nar/gkaa946 10.1111/1462-2920.15112	10.46936/10.25585/60000938
IMG_VR_1145	IMGVR_UViG_3300023245_000444|3300023245|Ga0222655_1001459	IMG_VR v3	Metagenome	3300023245	Linear	7925	Clustered	IMG_VR_1147	NA	NA	NA	NA	NA	10.1093/nar/gkaa946 10.1186/s40168-020-00889-8	10.46936/10.25585/60001034
IMG_VR_1146	IMGVR_UViG_3300023293_000093|3300023293|Ga0222688_1000107	IMG_VR v3	Metagenome	3300023293	Linear	24446	Seed	IMG_VR_1146	Partial	ATPase MCP Penton PRO	NA	NA	Maveriviricetes;Priklausovirales;Burtonviroviridae	10.1093/nar/gkaa946 10.1186/s40168-020-00889-8	10.46936/10.25585/60001034
IMG_VR_1147	IMGVR_UViG_3300023293_000140|3300023293|Ga0222688_1000173	IMG_VR v3	Metagenome	3300023293	Linear	18105	Seed	IMG_VR_1147	Partial	MCP Penton PRO	NA	NA	Maveriviricetes;Priklausovirales;Omnilimnoviroviridae	10.1093/nar/gkaa946 10.1186/s40168-020-00889-8	10.46936/10.25585/60001034
IMG_VR_1148	IMGVR_UViG_3300023294_000301|3300023294|Ga0222670_1001104	IMG_VR v3	Metagenome	3300023294	Linear	9872	Clustered	IMG_VR_1131	NA	NA	NA	NA	NA	10.1093/nar/gkaa946 10.1186/s40168-020-00889-8	10.46936/10.25585/60001034
IMG_VR_1152	IMGVR_UViG_3300024254_000039|3300024254|Ga0247661_1000063	IMG_VR v3	Metagenome	3300024254	DTR	20086	Seed	IMG_VR_1152	Complete	ATPase MCP Penton PRO	Group 002	Sputnik virophages	Maveriviricetes;Mividavirales;Sputniviroviridae	10.1016/j.soilbio.2021.108226 10.1093/nar/gkaa946 10.25585/1488292	10.46936/10.25585/60000715
IMG_VR_1153	IMGVR_UViG_3300024277_000030|3300024277|Ga0255207_1000241	IMG_VR v3	Metagenome	3300024277	Linear	13537	Clustered	IMG_VR_1247	NA	NA	NA	NA	NA	10.1093/nar/gkaa946	10.46936/10.25585/60000873
IMG_VR_1154	IMGVR_UViG_3300024278_000018|3300024278|Ga0255215_1000191	IMG_VR v3	Metagenome	3300024278	Linear	17745	Clustered	IMG_VR_1247	NA	NA	NA	NA	NA	10.1093/nar/gkaa946	10.46936/10.25585/60000873
IMG_VR_1155	IMGVR_UViG_3300024280_000025|3300024280|Ga0255209_1000333	IMG_VR v3	Metagenome	3300024280	Linear	16071	Clustered	IMG_VR_1247	NA	NA	NA	NA	NA	10.1093/nar/gkaa946	10.46936/10.25585/60000873
IMG_VR_1156	IMGVR_UViG_3300024282_000026|3300024282|Ga0255217_1000259	IMG_VR v3	Metagenome	3300024282	Linear	16825	Clustered	IMG_VR_1247	NA	NA	NA	NA	NA	10.1093/nar/gkaa946	10.46936/10.25585/60000873
IMG_VR_1157	IMGVR_UViG_3300024307_000029|3300024307|Ga0255221_1000392	IMG_VR v3	Metagenome	3300024307	Linear	9838	Clustered	IMG_VR_1247	NA	NA	NA	NA	NA	10.1093/nar/gkaa946	10.46936/10.25585/60000873
IMG_VR_1158	IMGVR_UViG_3300024311_000043|3300024311|Ga0255211_1000436	IMG_VR v3	Metagenome	3300024311	Linear	15074	Clustered	IMG_VR_1247	NA	NA	NA	NA	NA	10.1093/nar/gkaa946	10.46936/10.25585/60000873
IMG_VR_1159	IMGVR_UViG_3300024312_000020|3300024312|Ga0255219_1000237	IMG_VR v3	Metagenome	3300024312	Linear	16128	Clustered	IMG_VR_1247	NA	NA	NA	NA	NA	10.1093/nar/gkaa946	10.46936/10.25585/60000873
IMG_VR_1160	IMGVR_UViG_3300024346_000999|3300024346|Ga0244775_10003942	IMG_VR v3	Metagenome	3300024346	Linear	15641	Seed	IMG_VR_1160	Partial	ATPase MCP Penton PRO	NA	NA	Maveriviricetes;Priklausovirales;Dishuiviroviridae	10.1093/nar/gkaa946	10.46936/10.25585/60000867
IMG_VR_1161	IMGVR_UViG_3300024356_000052|3300024356|Ga0255169_1000324	IMG_VR v3	Metagenome	3300024356	Linear	20981	Clustered	IMG_VR_1243	NA	NA	NA	NA	NA	10.1093/nar/gkaa946	10.46936/10.25585/60000873
IMG_VR_1162	IMGVR_UViG_3300024502_000050|3300024502|Ga0255181_1000320	IMG_VR v3	Metagenome	3300024502	Linear	16559	Clustered	IMG_VR_1243	NA	NA	NA	NA	NA	10.1093/nar/gkaa946	10.46936/10.25585/60000873
IMG_VR_1163	IMGVR_UViG_3300024515_000102|3300024515|Ga0255183_1000725	IMG_VR v3	Metagenome	3300024515	Linear	11831	Clustered	IMG_VR_1243	NA	NA	NA	NA	NA	10.1093/nar/gkaa946	10.46936/10.25585/60000873
IMG_VR_1165	IMGVR_UViG_3300025141_000533|3300025141|Ga0209756_1000866	IMG_VR v3	Metagenome	3300025141	Linear	29141	Seed	IMG_VR_1165	Near-complete	ATPase MCP Penton PRO	Group 003	Aquatic virophages 2	Maveriviricetes;Priklausovirales;Burtonviroviridae	10.1038/s41396-021-01143-1 10.1093/nar/gkaa946	10.46936/10.25585/60007217
IMG_VR_1166	IMGVR_UViG_3300025168_003724|3300025168|Ga0209337_1006226	IMG_VR v3	Metagenome	3300025168	Linear	8034	Seed	IMG_VR_1166	Partial	NA	NA	NA	NA	10.1093/nar/gkaa946	10.46936/10.25585/60007217
IMG_VR_1167	IMGVR_UViG_3300025264_000069|3300025264|Ga0208029_1000354	IMG_VR v3	Metagenome	3300025264	Linear	30626	Clustered	PE_179	NA	NA	NA	NA	NA	10.1093/nar/gkaa946	10.46936/10.25585/60000616
IMG_VR_1168	IMGVR_UViG_3300025280_000111|3300025280|Ga0208449_1000421	IMG_VR v3	Metagenome	3300025280	Linear	30543	Clustered	PE_179	NA	NA	NA	NA	NA	10.1093/nar/gkaa946	10.46936/10.25585/60000616
IMG_VR_1169	IMGVR_UViG_3300025282_000154|3300025282|Ga0208030_1000391	IMG_VR v3	Metagenome	3300025282	Linear	30586	Clustered	PE_179	NA	NA	NA	NA	NA	10.1093/nar/gkaa946	10.46936/10.25585/60000616
IMG_VR_1170	IMGVR_UViG_3300025300_000058|3300025300|Ga0208181_1000275	IMG_VR v3	Metagenome	3300025300	Linear	30526	Clustered	PE_179	NA	NA	NA	NA	NA	10.1093/nar/gkaa946	10.46936/10.25585/60000616
IMG_VR_1171	IMGVR_UViG_3300025353_000020|3300025353|Ga0208255_100024	IMG_VR v3	Metagenome	3300025353	Linear	26906	Clustered	IMG_VR_0265	NA	NA	NA	NA	NA	10.1093/nar/gkaa946	10.46936/10.25585/60000543
IMG_VR_1172	IMGVR_UViG_3300025353_000062|3300025353|Ga0208255_100111	IMG_VR v3	Metagenome	3300025353	Linear	11463	Clustered	IMG_VR_1175	NA	NA	NA	NA	NA	10.1093/nar/gkaa946	10.46936/10.25585/60000543
IMG_VR_1173	IMGVR_UViG_3300025357_000058|3300025357|Ga0208383_1000064	IMG_VR v3	Metagenome	3300025357	Linear	23208	Clustered	IMG_VR_1182	NA	NA	NA	NA	NA	10.1093/nar/gkaa946	10.46936/10.25585/60000543
IMG_VR_1174	IMGVR_UViG_3300025368_000019|3300025368|Ga0208620_1000023	IMG_VR v3	Metagenome	3300025368	DTR	26599	Clustered	IMG_VR_0265	NA	NA	NA	NA	NA	10.1093/nar/gkaa946	10.46936/10.25585/60000543
IMG_VR_1175	IMGVR_UViG_3300025368_000030|3300025368|Ga0208620_1000066	IMG_VR v3	Metagenome	3300025368	Linear	17507	Seed	IMG_VR_1175	Partial	ATPase MCP Penton PRO	NA	NA	Maveriviricetes;Priklausovirales;Burtonviroviridae	10.1093/nar/gkaa946	10.46936/10.25585/60000543
IMG_VR_1176	IMGVR_UViG_3300025381_000170|3300025381|Ga0208871_1000289	IMG_VR v3	Metagenome	3300025381	Linear	17334	Seed	IMG_VR_1176	Partial	ATPase MCP Penton PRO	NA	NA	Maveriviricetes;Priklausovirales;Burtonviroviridae	10.1093/nar/gkaa946	10.46936/10.25585/60000543
IMG_VR_1177	IMGVR_UViG_3300025381_000412|3300025381|Ga0208871_1001214	IMG_VR v3	Metagenome	3300025381	Linear	6617	Clustered	IMG_VR_1202	NA	NA	NA	NA	NA	10.1093/nar/gkaa946	10.46936/10.25585/60000543
IMG_VR_1178	IMGVR_UViG_3300025382_000161|3300025382|Ga0208256_1000311	IMG_VR v3	Metagenome	3300025382	Linear	11343	Clustered	IMG_VR_0142	NA	NA	NA	NA	NA	10.1093/nar/gkaa946	10.46936/10.25585/60000543
IMG_VR_1179	IMGVR_UViG_3300025383_000149|3300025383|Ga0208250_1000230	IMG_VR v3	Metagenome	3300025383	Linear	18896	Clustered	PE_073	NA	NA	NA	NA	NA	10.1093/nar/gkaa946	10.46936/10.25585/60000543
IMG_VR_1180	IMGVR_UViG_3300025387_000167|3300025387|Ga0207959_1000337	IMG_VR v3	Metagenome	3300025387	Linear	12710	Seed	IMG_VR_1180	Partial	ATPase MCP Penton PRO	NA	NA	Maveriviricetes;Unclassified	10.1093/nar/gkaa946	10.46936/10.25585/60000543
IMG_VR_1181	IMGVR_UViG_3300025387_000190|3300025387|Ga0207959_1000408	IMG_VR v3	Metagenome	3300025387	Linear	11330	Clustered	IMG_VR_0142	NA	NA	NA	NA	NA	10.1093/nar/gkaa946	10.46936/10.25585/60000543
IMG_VR_1182	IMGVR_UViG_3300025389_000111|3300025389|Ga0208257_1000142	IMG_VR v3	Metagenome	3300025389	Linear	24997	Seed	IMG_VR_1182	Near-complete	ATPase MCP Penton PRO	Group 001	Aquatic virophages 1	Maveriviricetes;Priklausovirales;Omnilimnoviroviridae	10.1093/nar/gkaa946	10.46936/10.25585/60000543
IMG_VR_1183	IMGVR_UViG_3300025390_000034|3300025390|Ga0208743_1000162	IMG_VR v3	Metagenome	3300025390	Linear	26798	Clustered	IMG_VR_0265	NA	NA	NA	NA	NA	10.1093/nar/gkaa946	10.46936/10.25585/60000543
IMG_VR_1184	IMGVR_UViG_3300025395_000031|3300025395|Ga0208109_1000163	IMG_VR v3	Metagenome	3300025395	Linear	26843	Clustered	IMG_VR_0265	NA	NA	NA	NA	NA	10.1093/nar/gkaa946	10.46936/10.25585/60000543
IMG_VR_1185	IMGVR_UViG_3300025401_000010|3300025401|Ga0207955_1000104	IMG_VR v3	Metagenome	3300025401	DTR	29670	Seed	IMG_VR_1185	Complete	ATPase MCP Penton PRO	Group 001	Aquatic virophages 1	Maveriviricetes;Priklausovirales;Omnilimnoviroviridae	10.1093/nar/gkaa946	10.46936/10.25585/60000543
IMG_VR_1186	IMGVR_UViG_3300025407_000177|3300025407|Ga0208378_1000262	IMG_VR v3	Metagenome	3300025407	Linear	19121	Clustered	PE_073	NA	NA	NA	NA	NA	10.1093/nar/gkaa946	10.46936/10.25585/60000543
IMG_VR_1187	IMGVR_UViG_3300025415_000015|3300025415|Ga0208868_1000117	IMG_VR v3	Metagenome	3300025415	Linear	17962	Seed	IMG_VR_1187	Partial	ATPase MCP Penton PRO	NA	NA	Maveriviricetes;Unclassified	10.1093/nar/gkaa946	10.46936/10.25585/60000543
IMG_VR_1188	IMGVR_UViG_3300025417_000154|3300025417|Ga0208616_1000278	IMG_VR v3	Metagenome	3300025417	Linear	16000	Clustered	IMG_VR_1216	NA	NA	NA	NA	NA	10.1093/nar/gkaa946	10.46936/10.25585/60000543
IMG_VR_1189	IMGVR_UViG_3300025421_000044|3300025421|Ga0207958_1000088	IMG_VR v3	Metagenome	3300025421	Linear	31495	Seed	IMG_VR_1189	Near-complete	ATPase MCP Penton PRO	Group 005	Large virophages	Maveriviricetes;Priklausovirales;Gulliviroviridae	10.1093/nar/gkaa946	10.46936/10.25585/60000543
IMG_VR_1190	IMGVR_UViG_3300025421_000052|3300025421|Ga0207958_1000113	IMG_VR v3	Metagenome	3300025421	Linear	28702	Seed	IMG_VR_1190	Near-complete	ATPase MCP Penton PRO	Group 003	Aquatic virophages 2	Maveriviricetes;Priklausovirales;Burtonviroviridae	10.1093/nar/gkaa946	10.46936/10.25585/60000543
IMG_VR_1191	IMGVR_UViG_3300025430_000555|3300025430|Ga0208622_1002564	IMG_VR v3	Metagenome	3300025430	Linear	5311	Clustered	IMG_VR_1202	NA	NA	NA	NA	NA	10.1093/nar/gkaa946	10.46936/10.25585/60000543
IMG_VR_1192	IMGVR_UViG_3300025435_000058|3300025435|Ga0208618_1000177	IMG_VR v3	Metagenome	3300025435	Linear	30170	Clustered	IMG_VR_1236	NA	NA	NA	NA	NA	10.1093/nar/gkaa946	10.46936/10.25585/60000543
IMG_VR_1193	IMGVR_UViG_3300025435_000072|3300025435|Ga0208618_1000225	IMG_VR v3	Metagenome	3300025435	DTR	26599	Clustered	IMG_VR_0265	NA	NA	NA	NA	NA	10.1093/nar/gkaa946	10.46936/10.25585/60000543
IMG_VR_1194	IMGVR_UViG_3300025435_000401|3300025435|Ga0208618_1002341	IMG_VR v3	Metagenome	3300025435	Linear	6464	Clustered	IMG_VR_1175	NA	NA	NA	NA	NA	10.1093/nar/gkaa946	10.46936/10.25585/60000543
IMG_VR_1195	IMGVR_UViG_3300025446_000079|3300025446|Ga0208038_1002552	IMG_VR v3	Metagenome	3300025446	Linear	8389	Clustered	IMG_VR_0672	NA	NA	NA	NA	NA	10.1093/nar/gkaa946	10.46936/10.25585/60001027
IMG_VR_1196	IMGVR_UViG_3300025449_000045|3300025449|Ga0208106_1000154	IMG_VR v3	Metagenome	3300025449	Linear	26646	Clustered	IMG_VR_0265	NA	NA	NA	NA	NA	10.1093/nar/gkaa946	10.46936/10.25585/60000543
IMG_VR_1197	IMGVR_UViG_3300025449_000099|3300025449|Ga0208106_1000320	IMG_VR v3	Metagenome	3300025449	Linear	16905	Clustered	IMG_VR_1236	NA	NA	NA	NA	NA	10.1093/nar/gkaa946	10.46936/10.25585/60000543
IMG_VR_1198	IMGVR_UViG_3300025466_000222|3300025466|Ga0208497_1000437	IMG_VR v3	Metagenome	3300025466	Linear	19632	Clustered	IMG_VR_0161	NA	NA	NA	NA	NA	10.1093/nar/gkaa946	10.46936/10.25585/60000543
IMG_VR_1199	IMGVR_UViG_3300025466_000339|3300025466|Ga0208497_1000780	IMG_VR v3	Metagenome	3300025466	Linear	13245	Seed	IMG_VR_1199	Partial	MCP Penton PRO	NA	NA	Maveriviricetes;Priklausovirales;Burtonviroviridae	10.1093/nar/gkaa946	10.46936/10.25585/60000543
IMG_VR_1200	IMGVR_UViG_3300025470_000103|3300025470|Ga0208389_1000432	IMG_VR v3	Metagenome	3300025470	Linear	21856	Seed	IMG_VR_1200	Partial	ATPase MCP Penton PRO	NA	NA	Maveriviricetes;Priklausovirales;Burtonviroviridae	10.1093/nar/gkaa946	10.46936/10.25585/60000543
IMG_VR_1201	IMGVR_UViG_3300025470_000156|3300025470|Ga0208389_1000655	IMG_VR v3	Metagenome	3300025470	Linear	16293	Seed	IMG_VR_1201	Partial	MCP Penton PRO	NA	NA	Maveriviricetes;Priklausovirales;Burtonviroviridae	10.1093/nar/gkaa946	10.46936/10.25585/60000543
IMG_VR_1202	IMGVR_UViG_3300025470_000167|3300025470|Ga0208389_1000728	IMG_VR v3	Metagenome	3300025470	Linear	15172	Seed	IMG_VR_1202	Partial	ATPase MCP Penton PRO	NA	NA	Maveriviricetes;Priklausovirales;Burtonviroviridae	10.1093/nar/gkaa946	10.46936/10.25585/60000543
IMG_VR_1203	IMGVR_UViG_3300025487_000090|3300025487|Ga0208105_1000377	IMG_VR v3	Metagenome	3300025487	DTR	15361	Seed	IMG_VR_1203	Complete	ATPase MCP Penton PRO	Group 001	Aquatic virophages 1	Maveriviricetes;Priklausovirales;Omnilimnoviroviridae	10.1093/nar/gkaa946	10.46936/10.25585/60000543
IMG_VR_1204	IMGVR_UViG_3300025543_000291|3300025543|Ga0208303_1000311	IMG_VR v3	Metagenome	3300025543	Linear	20153	Clustered	PE_061	NA	NA	NA	NA	NA	10.1093/nar/gkaa946 10.1128/mSystems.01020-20	10.46936/10.25585/60000748
IMG_VR_1205	IMGVR_UViG_3300025543_000580|3300025543|Ga0208303_1000651	IMG_VR v3	Metagenome	3300025543	Linear	14352	Clustered	IMG_VR_0380	NA	NA	NA	NA	NA	10.1093/nar/gkaa946 10.1128/mSystems.01020-20	10.46936/10.25585/60000748
IMG_VR_1206	IMGVR_UViG_3300025598_000188|3300025598|Ga0208379_1000298	IMG_VR v3	Metagenome	3300025598	Linear	23230	Clustered	IMG_VR_1190	NA	NA	NA	NA	NA	10.1093/nar/gkaa946	10.46936/10.25585/60000543
IMG_VR_1207	IMGVR_UViG_3300025598_000194|3300025598|Ga0208379_1000309	IMG_VR v3	Metagenome	3300025598	Linear	22542	Seed	IMG_VR_1207	Partial	ATPase MCP Penton PRO	NA	NA	Maveriviricetes;Priklausovirales;Burtonviroviridae	10.1093/nar/gkaa946	10.46936/10.25585/60000543
IMG_VR_1208	IMGVR_UViG_3300025645_000423|3300025645|Ga0208643_1000530	IMG_VR v3	Metagenome	3300025645	Linear	25089	Seed	IMG_VR_1208	Near-complete	ATPase MCP Penton PRO	Group 002	Sputnik virophages	Maveriviricetes;Mividavirales;Sputniviroviridae	10.1093/nar/gkaa946 10.1128/mSystems.01020-20	10.46936/10.25585/60000748
IMG_VR_1209	IMGVR_UViG_3300025646_000334|3300025646|Ga0208161_1000391	IMG_VR v3	Metagenome	3300025646	Linear	25333	Clustered	IMG_VR_1219	NA	NA	NA	NA	NA	10.1093/nar/gkaa946 10.1128/mSystems.01020-20	10.46936/10.25585/60000748
IMG_VR_1210	IMGVR_UViG_3300025646_000418|3300025646|Ga0208161_1000493	IMG_VR v3	Metagenome	3300025646	Linear	22547	Seed	IMG_VR_1210	Partial	ATPase MCP Penton PRO	NA	NA	Maveriviricetes;Mividavirales;Sputniviroviridae	10.1093/nar/gkaa946 10.1128/mSystems.01020-20	10.46936/10.25585/60000748
IMG_VR_1211	IMGVR_UViG_3300025646_000419|3300025646|Ga0208161_1000494	IMG_VR v3	Metagenome	3300025646	DTR	22392	Seed	IMG_VR_1211	Complete	ATPase MCP Penton PRO	Group 002	Sputnik virophages	Maveriviricetes;Mividavirales;Sputniviroviridae	10.1093/nar/gkaa946 10.1128/mSystems.01020-20	10.46936/10.25585/60000748
IMG_VR_1212	IMGVR_UViG_3300025646_000822|3300025646|Ga0208161_1001060	IMG_VR v3	Metagenome	3300025646	Linear	15038	Clustered	IMG_VR_0386	NA	NA	NA	NA	NA	10.1093/nar/gkaa946 10.1128/mSystems.01020-20	10.46936/10.25585/60000748
IMG_VR_1213	IMGVR_UViG_3300025646_001070|3300025646|Ga0208161_1001434	IMG_VR v3	Metagenome	3300025646	Linear	12679	Seed	IMG_VR_1213	Partial	ATPase MCP Penton PRO	NA	NA	Maveriviricetes;Mividavirales;Sputniviroviridae	10.1093/nar/gkaa946 10.1128/mSystems.01020-20	10.46936/10.25585/60000748
IMG_VR_1214	IMGVR_UViG_3300025646_002347|3300025646|Ga0208161_1004404	IMG_VR v3	Metagenome	3300025646	Linear	6621	Seed	IMG_VR_1214	Partial	NA	NA	NA	NA	10.1093/nar/gkaa946 10.1128/mSystems.01020-20	10.46936/10.25585/60000748
IMG_VR_1215	IMGVR_UViG_3300025647_000309|3300025647|Ga0208160_1000345	IMG_VR v3	Metagenome	3300025647	DTR	22392	Clustered	IMG_VR_1211	NA	NA	NA	NA	NA	10.1093/nar/gkaa946 10.1128/mSystems.01020-20	10.46936/10.25585/60000748
IMG_VR_1216	IMGVR_UViG_3300025648_000157|3300025648|Ga0208507_1001053	IMG_VR v3	Metagenome	3300025648	Linear	16132	Seed	IMG_VR_1216	Partial	ATPase MCP Penton PRO	NA	NA	Maveriviricetes;Unclassified	10.1093/nar/gkaa946	10.46936/10.25585/60000543
IMG_VR_1217	IMGVR_UViG_3300025652_000578|3300025652|Ga0208134_1000615	IMG_VR v3	Metagenome	3300025652	Linear	23169	Clustered	IMG_VR_0344	NA	NA	NA	NA	NA	10.1093/nar/gkaa946 10.1128/mSystems.01020-20	10.46936/10.25585/60000748
IMG_VR_1218	IMGVR_UViG_3300025652_001697|3300025652|Ga0208134_1002048	IMG_VR v3	Metagenome	3300025652	Linear	11099	Clustered	IMG_VR_0355	NA	NA	NA	NA	NA	10.1093/nar/gkaa946 10.1128/mSystems.01020-20	10.46936/10.25585/60000748
IMG_VR_1219	IMGVR_UViG_3300025655_000262|3300025655|Ga0208795_1000291	IMG_VR v3	Metagenome	3300025655	Linear	25369	Seed	IMG_VR_1219	Near-complete	ATPase MCP Penton PRO	Group 004	SW01 virophages	Maveriviricetes;Priklausovirales;Dishuiviroviridae	10.1093/nar/gkaa946 10.1128/mSystems.01020-20	10.46936/10.25585/60000748
IMG_VR_1220	IMGVR_UViG_3300025655_000320|3300025655|Ga0208795_1000360	IMG_VR v3	Metagenome	3300025655	DTR	22392	Clustered	IMG_VR_1211	NA	NA	NA	NA	NA	10.1093/nar/gkaa946 10.1128/mSystems.01020-20	10.46936/10.25585/60000748
IMG_VR_1221	IMGVR_UViG_3300025674_001015|3300025674|Ga0208162_1001300	IMG_VR v3	Metagenome	3300025674	Linear	13139	Seed	IMG_VR_1221	Partial	ATPase MCP PRO	NA	NA	Maveriviricetes;Mividavirales;Sputniviroviridae	10.1093/nar/gkaa946 10.1128/mSystems.01020-20	10.46936/10.25585/60000748
IMG_VR_1222	IMGVR_UViG_3300025674_001993|3300025674|Ga0208162_1003068	IMG_VR v3	Metagenome	3300025674	Linear	8093	Seed	IMG_VR_1222	Partial	ATPase MCP Penton PRO	NA	NA	Maveriviricetes;Mividavirales;Sputniviroviridae	10.1093/nar/gkaa946 10.1128/mSystems.01020-20	10.46936/10.25585/60000748
IMG_VR_1223	IMGVR_UViG_3300025684_000119|3300025684|Ga0209652_1002125	IMG_VR v3	Metagenome	3300025684	Linear	15604	Seed	IMG_VR_1223	Partial	ATPase MCP Penton PRO	NA	NA	Maveriviricetes;Mividavirales;Sputniviroviridae	10.1093/nar/gkaa946	10.46936/10.25585/60000795
IMG_VR_1224	IMGVR_UViG_3300025687_000239|3300025687|Ga0208019_1000284	IMG_VR v3	Metagenome	3300025687	Linear	27904	Seed	IMG_VR_1224	Near-complete	ATPase MCP Penton PRO	Group 001	Aquatic virophages 1	Maveriviricetes;Priklausovirales;Omnilimnoviroviridae	10.1093/nar/gkaa946 10.1128/mSystems.01020-20	10.46936/10.25585/60000748
IMG_VR_1225	IMGVR_UViG_3300025687_000355|3300025687|Ga0208019_1000434	IMG_VR v3	Metagenome	3300025687	Linear	22493	Clustered	IMG_VR_1211	NA	NA	NA	NA	NA	10.1093/nar/gkaa946 10.1128/mSystems.01020-20	10.46936/10.25585/60000748
IMG_VR_1226	IMGVR_UViG_3300025698_000094|3300025698|Ga0208771_1000840	IMG_VR v3	Metagenome	3300025698	Linear	17565	Seed	IMG_VR_1226	Partial	ATPase MCP Penton	NA	NA	Maveriviricetes;Priklausovirales;Omnilimnoviroviridae	10.1093/nar/gkaa946 10.1186/s40168-020-00889-8	10.46936/10.25585/60001034
IMG_VR_1227	IMGVR_UViG_3300025723_000176|3300025723|Ga0208741_10000348	IMG_VR v3	Metagenome	3300025723	Linear	23439	Seed	IMG_VR_1227	Partial	ATPase MCP Penton PRO	NA	NA	Maveriviricetes;Unclassified	10.1093/nar/gkaa946	10.46936/10.25585/60000543
IMG_VR_1228	IMGVR_UViG_3300025723_000351|3300025723|Ga0208741_10000828	IMG_VR v3	Metagenome	3300025723	Linear	13649	Clustered	IMG_VR_0161	NA	NA	NA	NA	NA	10.1093/nar/gkaa946	10.46936/10.25585/60000543
IMG_VR_1229	IMGVR_UViG_3300025736_000494|3300025736|Ga0207997_1001135	IMG_VR v3	Metagenome	3300025736	DTR	13788	Seed	IMG_VR_1229	Complete	ATPase MCP Penton PRO	Group 002	NA	Maveriviricetes;Unclassified	10.1093/nar/gkaa946 10.1186/s40168-020-00889-8	10.46936/10.25585/60001034
IMG_VR_1230	IMGVR_UViG_3300025769_001903|3300025769|Ga0208767_1002240	IMG_VR v3	Metagenome	3300025769	Linear	14835	Clustered	IMG_VR_0320	NA	NA	NA	NA	NA	10.1093/nar/gkaa946 10.1128/mSystems.01020-20	10.46936/10.25585/60000748
IMG_VR_1231	IMGVR_UViG_3300025777_000009|3300025777|Ga0208110_1000015	IMG_VR v3	Metagenome	3300025777	DTR	26599	Clustered	IMG_VR_0265	NA	NA	NA	NA	NA	10.1093/nar/gkaa946	10.46936/10.25585/60000543
IMG_VR_1232	IMGVR_UViG_3300025777_000037|3300025777|Ga0208110_1000142	IMG_VR v3	Metagenome	3300025777	Linear	13463	Clustered	IMG_VR_1175	NA	NA	NA	NA	NA	10.1093/nar/gkaa946	10.46936/10.25585/60000543
IMG_VR_1233	IMGVR_UViG_3300025778_000202|3300025778|Ga0208388_1000327	IMG_VR v3	Metagenome	3300025778	Linear	11358	Clustered	IMG_VR_0142	NA	NA	NA	NA	NA	10.1093/nar/gkaa946	10.46936/10.25585/60000543
IMG_VR_1234	IMGVR_UViG_3300025785_000286|3300025785|Ga0208498_1000944	IMG_VR v3	Metagenome	3300025785	Linear	10064	Clustered	IMG_VR_1201	NA	NA	NA	NA	NA	10.1093/nar/gkaa946	10.46936/10.25585/60000543
IMG_VR_1235	IMGVR_UViG_3300025789_000157|3300025789|Ga0208499_1000225	IMG_VR v3	Metagenome	3300025789	Linear	23802	Clustered	IMG_VR_1185	NA	NA	NA	NA	NA	10.1093/nar/gkaa946	10.46936/10.25585/60000543
IMG_VR_1236	IMGVR_UViG_3300025838_000094|3300025838|Ga0208872_1000426	IMG_VR v3	Metagenome	3300025838	DTR	32278	Seed	IMG_VR_1236	Complete	ATPase MCP Penton PRO	Group 003	Aquatic virophages 2	Maveriviricetes;Priklausovirales;Burtonviroviridae	10.1093/nar/gkaa946	10.46936/10.25585/60000543
IMG_VR_1237	IMGVR_UViG_3300025838_000105|3300025838|Ga0208872_1000548	IMG_VR v3	Metagenome	3300025838	Linear	26649	Clustered	IMG_VR_0265	NA	NA	NA	NA	NA	10.1093/nar/gkaa946	10.46936/10.25585/60000543
IMG_VR_1238	IMGVR_UViG_3300025838_000241|3300025838|Ga0208872_1001575	IMG_VR v3	Metagenome	3300025838	Linear	13905	Clustered	IMG_VR_1175	NA	NA	NA	NA	NA	10.1093/nar/gkaa946	10.46936/10.25585/60000543
IMG_VR_1239	IMGVR_UViG_3300025880_000261|3300025880|Ga0209534_10003667	IMG_VR v3	Metagenome	3300025880	Linear	14514	Seed	IMG_VR_1239	Partial	ATPase MCP Penton PRO	NA	NA	Maveriviricetes;Mividavirales;Sputniviroviridae	10.1038/s41396-019-0476-y 10.1093/nar/gkaa946	10.46936/10.25585/60000792
IMG_VR_1240	IMGVR_UViG_3300025889_001483|3300025889|Ga0208644_1001743	IMG_VR v3	Metagenome	3300025889	Linear	17925	Seed	IMG_VR_1240	Partial	ATPase MCP Penton PRO	NA	NA	Maveriviricetes;Priklausovirales;Omnilimnoviroviridae	10.1093/nar/gkaa946 10.1128/mSystems.01020-20	10.46936/10.25585/60000748
IMG_VR_1241	IMGVR_UViG_3300025889_002197|3300025889|Ga0208644_1002748	IMG_VR v3	Metagenome	3300025889	Linear	13899	Clustered	IMG_VR_0317	NA	NA	NA	NA	NA	10.1093/nar/gkaa946 10.1128/mSystems.01020-20	10.46936/10.25585/60000748
IMG_VR_1242	IMGVR_UViG_3300026097_000286|3300026097|Ga0209953_1000721	IMG_VR v3	Metagenome	3300026097	Linear	11380	Clustered	IMG_VR_0394	NA	NA	NA	NA	NA	10.1038/s41396-021-01067-w 10.1093/nar/gkaa946	10.46936/10.25585/60000820
IMG_VR_1243	IMGVR_UViG_3300026459_000040|3300026459|Ga0255170_1000232	IMG_VR v3	Metagenome	3300026459	Linear	25845	Seed	IMG_VR_1243	Near-complete	ATPase MCP Penton PRO	Group 002	NA	Maveriviricetes;Unclassified	10.1093/nar/gkaa946	10.46936/10.25585/60000873
IMG_VR_1244	IMGVR_UViG_3300026473_000107|3300026473|Ga0255166_1000660	IMG_VR v3	Metagenome	3300026473	Linear	11476	Clustered	IMG_VR_1243	NA	NA	NA	NA	NA	10.1093/nar/gkaa946	10.46936/10.25585/60000873
IMG_VR_1245	IMGVR_UViG_3300027162_000027|3300027162|Ga0255212_1000365	IMG_VR v3	Metagenome	3300027162	Linear	12148	Clustered	IMG_VR_1247	NA	NA	NA	NA	NA	10.1093/nar/gkaa946	10.46936/10.25585/60000873
IMG_VR_1246	IMGVR_UViG_3300027306_000023|3300027306|Ga0255220_1000425	IMG_VR v3	Metagenome	3300027306	Linear	17325	Clustered	IMG_VR_1247	NA	NA	NA	NA	NA	10.1093/nar/gkaa946	10.46936/10.25585/60000873
IMG_VR_1247	IMGVR_UViG_3300027339_000023|3300027339|Ga0255210_1000282	IMG_VR v3	Metagenome	3300027339	Linear	20571	Seed	IMG_VR_1247	Partial	ATPase MCP Penton PRO	NA	NA	Maveriviricetes;Mividavirales;Sputniviroviridae	10.1093/nar/gkaa946	10.46936/10.25585/60000873
IMG_VR_1248	IMGVR_UViG_3300027503_000108|3300027503|Ga0255182_1001060	IMG_VR v3	Metagenome	3300027503	Linear	15521	Clustered	IMG_VR_1243	NA	NA	NA	NA	NA	10.1093/nar/gkaa946	10.46936/10.25585/60000873
IMG_VR_1249	IMGVR_UViG_3300027518_000035|3300027518|Ga0208787_1000384	IMG_VR v3	Metagenome	3300027518	Linear	21470	Seed	IMG_VR_1249	Partial	ATPase MCP Penton PRO	NA	NA	Maveriviricetes;Priklausovirales;Dishuiviroviridae	10.1038/s41564-018-0312-6 10.1093/nar/gkaa946	10.46936/jejc.proj.2014.48483/60005501
IMG_VR_1250	IMGVR_UViG_3300027608_000292|3300027608|Ga0208974_1000508	IMG_VR v3	Metagenome	3300027608	Linear	16019	Seed	IMG_VR_1250	Partial	ATPase MCP Penton PRO	NA	NA	Maveriviricetes;Priklausovirales;Burtonviroviridae	10.1093/nar/gkaa946 10.1128/mbio.02379-21	10.46936/10.25585/60000574
IMG_VR_1251	IMGVR_UViG_3300027707_000100|3300027707|Ga0209443_1000548	IMG_VR v3	Metagenome	3300027707	Linear	25598	Seed	IMG_VR_1251	Near-complete	ATPase MCP Penton PRO	Group 001	Aquatic virophages 1	Maveriviricetes;Priklausovirales;Omnilimnoviroviridae	10.1093/nar/gkaa946 10.1128/AEM.00140-20	10.46936/10.25585/60000744
IMG_VR_1252	IMGVR_UViG_3300027707_000356|3300027707|Ga0209443_1003807	IMG_VR v3	Metagenome	3300027707	Linear	8432	Seed	IMG_VR_1252	Partial	ATPase MCP Penton PRO	NA	NA	Maveriviricetes;Mividavirales;Sputniviroviridae	10.1093/nar/gkaa946 10.1128/AEM.00140-20	10.46936/10.25585/60000744
IMG_VR_1253	IMGVR_UViG_3300027707_000360|3300027707|Ga0209443_1003879	IMG_VR v3	Metagenome	3300027707	Linear	8342	Seed	IMG_VR_1253	Partial	ATPase MCP Penton PRO	NA	NA	Maveriviricetes;Mividavirales;Sputniviroviridae	10.1093/nar/gkaa946 10.1128/AEM.00140-20	10.46936/10.25585/60000744
IMG_VR_1254	IMGVR_UViG_3300027708_000255|3300027708|Ga0209188_1000858	IMG_VR v3	Metagenome	3300027708	Linear	26954	Seed	IMG_VR_1254	Near-complete	ATPase MCP Penton PRO	Group 005	Large virophages	Maveriviricetes;Priklausovirales;Gulliviroviridae	10.1093/nar/gkaa946 10.1111/1462-2920.14283	10.46936/10.25585/60000587
IMG_VR_1255	IMGVR_UViG_3300027708_000281|3300027708|Ga0209188_1000973	IMG_VR v3	Metagenome	3300027708	DTR	24731	Seed	IMG_VR_1255	Complete	ATPase MCP Penton PRO	Group 004	SW01 virophages	Maveriviricetes;Priklausovirales;Dishuiviroviridae	10.1093/nar/gkaa946 10.1111/1462-2920.14283	10.46936/10.25585/60000587
IMG_VR_1256	IMGVR_UViG_3300027708_000791|3300027708|Ga0209188_1004143	IMG_VR v3	Metagenome	3300027708	Linear	9679	Clustered	IMG_VR_0592	NA	NA	NA	NA	NA	10.1093/nar/gkaa946 10.1111/1462-2920.14283	10.46936/10.25585/60000587
IMG_VR_1257	IMGVR_UViG_3300027710_000304|3300027710|Ga0209599_10001206	IMG_VR v3	Metagenome	3300027710	Linear	12955	Seed	IMG_VR_1257	Partial	ATPase MCP Penton PRO	NA	NA	Maveriviricetes;Priklausovirales;Omnilimnoviroviridae	10.1038/s41564-018-0312-6 10.1093/nar/gkaa946	10.46936/10.25585/60001053
IMG_VR_1258	IMGVR_UViG_3300027712_000301|3300027712|Ga0209499_1001864	IMG_VR v3	Metagenome	3300027712	Linear	14070	Clustered	IMG_VR_0660	NA	NA	NA	NA	NA	10.1093/nar/gkaa946 10.1111/1462-2920.14283	10.46936/10.25585/60000587
IMG_VR_1261	IMGVR_UViG_3300027734_000274|3300027734|Ga0209087_1000438	IMG_VR v3	Metagenome	3300027734	DTR	26401	Clustered	IMG_VR_0609	NA	NA	NA	NA	NA	10.1093/nar/gkaa946 10.1111/1462-2920.14283	10.46936/10.25585/60000587
IMG_VR_1262	IMGVR_UViG_3300027736_000161|3300027736|Ga0209190_1000421	IMG_VR v3	Metagenome	3300027736	Linear	31043	Clustered	IMG_VR_0548	NA	NA	NA	NA	NA	10.1093/nar/gkaa946 10.1111/1462-2920.14283	10.46936/10.25585/60000587
IMG_VR_1263	IMGVR_UViG_3300027736_000226|3300027736|Ga0209190_1000623	IMG_VR v3	Metagenome	3300027736	Linear	25753	Seed	IMG_VR_1263	Near-complete	ATPase MCP Penton PRO	Group 004	SW01 virophages	Maveriviricetes;Priklausovirales;Dishuiviroviridae	10.1093/nar/gkaa946 10.1111/1462-2920.14283	10.46936/10.25585/60000587
IMG_VR_1264	IMGVR_UViG_3300027736_000265|3300027736|Ga0209190_1000784	IMG_VR v3	Metagenome	3300027736	Linear	22793	Clustered	IMG_VR_0584	NA	NA	NA	NA	NA	10.1093/nar/gkaa946 10.1111/1462-2920.14283	10.46936/10.25585/60000587
IMG_VR_1265	IMGVR_UViG_3300027741_000234|3300027741|Ga0209085_1000565	IMG_VR v3	Metagenome	3300027741	Linear	26740	Clustered	IMG_VR_1254	NA	NA	NA	NA	NA	10.1093/nar/gkaa946 10.1111/1462-2920.14283	10.46936/10.25585/60000587
IMG_VR_1266	IMGVR_UViG_3300027741_000241|3300027741|Ga0209085_1000584	IMG_VR v3	Metagenome	3300027741	Linear	26332	Clustered	IMG_VR_0712	NA	NA	NA	NA	NA	10.1093/nar/gkaa946 10.1111/1462-2920.14283	10.46936/10.25585/60000587
IMG_VR_1267	IMGVR_UViG_3300027741_000259|3300027741|Ga0209085_1000657	IMG_VR v3	Metagenome	3300027741	Linear	24462	Clustered	IMG_VR_0501	NA	NA	NA	NA	NA	10.1093/nar/gkaa946 10.1111/1462-2920.14283	10.46936/10.25585/60000587
IMG_VR_1268	IMGVR_UViG_3300027741_000303|3300027741|Ga0209085_1000798	IMG_VR v3	Metagenome	3300027741	Linear	21879	Seed	IMG_VR_1268	Partial	ATPase MCP Penton PRO	NA	NA	Maveriviricetes;Priklausovirales;Burtonviroviridae	10.1093/nar/gkaa946 10.1111/1462-2920.14283	10.46936/10.25585/60000587
IMG_VR_1269	IMGVR_UViG_3300027741_000437|3300027741|Ga0209085_1001389	IMG_VR v3	Metagenome	3300027741	Linear	15015	Clustered	IMG_VR_0504	NA	NA	NA	NA	NA	10.1093/nar/gkaa946 10.1111/1462-2920.14283	10.46936/10.25585/60000587
IMG_VR_1270	IMGVR_UViG_3300027741_000479|3300027741|Ga0209085_1001593	IMG_VR v3	Metagenome	3300027741	Linear	13780	Seed	IMG_VR_1270	Partial	NA	NA	NA	NA	10.1093/nar/gkaa946 10.1111/1462-2920.14283	10.46936/10.25585/60000587
IMG_VR_1271	IMGVR_UViG_3300027746_000068|3300027746|Ga0209597_1000348	IMG_VR v3	Metagenome	3300027746	Linear	31057	Clustered	IMG_VR_0548	NA	NA	NA	NA	NA	10.1093/nar/gkaa946 10.1111/1462-2920.14283	10.46936/10.25585/60000587
IMG_VR_1272	IMGVR_UViG_3300027746_000089|3300027746|Ga0209597_1000516	IMG_VR v3	Metagenome	3300027746	DTR	25292	Clustered	IMG_VR_0792	NA	NA	NA	NA	NA	10.1093/nar/gkaa946 10.1111/1462-2920.14283	10.46936/10.25585/60000587
IMG_VR_1273	IMGVR_UViG_3300027746_000090|3300027746|Ga0209597_1000518	IMG_VR v3	Metagenome	3300027746	Linear	25410	Clustered	IMG_VR_1263	NA	NA	NA	NA	NA	10.1093/nar/gkaa946 10.1111/1462-2920.14283	10.46936/10.25585/60000587
IMG_VR_1274	IMGVR_UViG_3300027746_000106|3300027746|Ga0209597_1000688	IMG_VR v3	Metagenome	3300027746	Linear	22091	Clustered	IMG_VR_0810	NA	NA	NA	NA	NA	10.1093/nar/gkaa946 10.1111/1462-2920.14283	10.46936/10.25585/60000587
IMG_VR_1275	IMGVR_UViG_3300027749_000350|3300027749|Ga0209084_1000680	IMG_VR v3	Metagenome	3300027749	Linear	31529	Seed	IMG_VR_1275	Near-complete	ATPase MCP Penton PRO	Group 005	Large virophages	Maveriviricetes;Priklausovirales;Gulliviroviridae	10.1093/nar/gkaa946 10.1111/1462-2920.14283	10.46936/10.25585/60000587
IMG_VR_1276	IMGVR_UViG_3300027749_000362|3300027749|Ga0209084_1000714	IMG_VR v3	Metagenome	3300027749	ITR	30731	Seed	IMG_VR_1276	Complete	ATPase MCP Penton PRO	Group 005	Large virophages	Maveriviricetes;Priklausovirales;Gulliviroviridae	10.1093/nar/gkaa946 10.1111/1462-2920.14283	10.46936/10.25585/60000587
IMG_VR_1277	IMGVR_UViG_3300027749_000389|3300027749|Ga0209084_1000770	IMG_VR v3	Metagenome	3300027749	Linear	29238	Seed	IMG_VR_1277	Near-complete	ATPase MCP Penton PRO	Group 005	Large virophages	Maveriviricetes;Priklausovirales;Gulliviroviridae	10.1093/nar/gkaa946 10.1111/1462-2920.14283	10.46936/10.25585/60000587
IMG_VR_1278	IMGVR_UViG_3300027749_000487|3300027749|Ga0209084_1001137	IMG_VR v3	Metagenome	3300027749	Linear	23074	Clustered	IMG_VR_0802	NA	NA	NA	NA	NA	10.1093/nar/gkaa946 10.1111/1462-2920.14283	10.46936/10.25585/60000587
IMG_VR_1279	IMGVR_UViG_3300027749_000582|3300027749|Ga0209084_1001515	IMG_VR v3	Metagenome	3300027749	Linear	19400	Clustered	IMG_VR_0470	NA	NA	NA	NA	NA	10.1093/nar/gkaa946 10.1111/1462-2920.14283	10.46936/10.25585/60000587
IMG_VR_1280	IMGVR_UViG_3300027749_000616|3300027749|Ga0209084_1001611	IMG_VR v3	Metagenome	3300027749	Linear	18614	Clustered	IMG_VR_1144	NA	NA	NA	NA	NA	10.1093/nar/gkaa946 10.1111/1462-2920.14283	10.46936/10.25585/60000587
IMG_VR_1281	IMGVR_UViG_3300027749_001005|3300027749|Ga0209084_1003408	IMG_VR v3	Metagenome	3300027749	Linear	11736	Seed	IMG_VR_1281	Partial	ATPase MCP Penton	NA	NA	Maveriviricetes;Priklausovirales;Omnilimnoviroviridae	10.1093/nar/gkaa946 10.1111/1462-2920.14283	10.46936/10.25585/60000587
IMG_VR_1282	IMGVR_UViG_3300027749_001124|3300027749|Ga0209084_1004005	IMG_VR v3	Metagenome	3300027749	Linear	10531	Clustered	IMG_VR_0464	NA	NA	NA	NA	NA	10.1093/nar/gkaa946 10.1111/1462-2920.14283	10.46936/10.25585/60000587
IMG_VR_1283	IMGVR_UViG_3300027754_000296|3300027754|Ga0209596_1000675	IMG_VR v3	Metagenome	3300027754	Linear	31440	Seed	IMG_VR_1283	Near-complete	ATPase MCP Penton PRO	Group 005	Large virophages	Maveriviricetes;Priklausovirales;Gulliviroviridae	10.1093/nar/gkaa946 10.1111/1462-2920.14283	10.46936/10.25585/60000587
IMG_VR_1284	IMGVR_UViG_3300027754_000514|3300027754|Ga0209596_1001375	IMG_VR v3	Metagenome	3300027754	Linear	20996	Clustered	IMG_VR_0584	NA	NA	NA	NA	NA	10.1093/nar/gkaa946 10.1111/1462-2920.14283	10.46936/10.25585/60000587
IMG_VR_1285	IMGVR_UViG_3300027754_000535|3300027754|Ga0209596_1001468	IMG_VR v3	Metagenome	3300027754	Linear	20305	Seed	IMG_VR_1285	Partial	ATPase MCP Penton PRO	NA	NA	Maveriviricetes;Priklausovirales;Omnilimnoviroviridae	10.1093/nar/gkaa946 10.1111/1462-2920.14283	10.46936/10.25585/60000587
IMG_VR_1286	IMGVR_UViG_3300027754_001006|3300027754|Ga0209596_1004188	IMG_VR v3	Metagenome	3300027754	Linear	11101	Clustered	IMG_VR_0799	NA	NA	NA	NA	NA	10.1093/nar/gkaa946 10.1111/1462-2920.14283	10.46936/10.25585/60000587
IMG_VR_1287	IMGVR_UViG_3300027754_001392|3300027754|Ga0209596_1008743	IMG_VR v3	Metagenome	3300027754	Linear	6951	Seed	IMG_VR_1287	Partial	ATPase MCP PRO	NA	NA	Maveriviricetes;Unclassified	10.1093/nar/gkaa946 10.1111/1462-2920.14283	10.46936/10.25585/60000587
IMG_VR_1288	IMGVR_UViG_3300027759_000031|3300027759|Ga0209296_1000562	IMG_VR v3	Metagenome	3300027759	DTR	32208	Clustered	IMG_VR_0600	NA	NA	NA	NA	NA	10.1093/nar/gkaa946 10.1111/1462-2920.14283	10.46936/10.25585/60000587
IMG_VR_1289	IMGVR_UViG_3300027759_000301|3300027759|Ga0209296_1000620	IMG_VR v3	Metagenome	3300027759	Linear	30574	Seed	IMG_VR_1289	Near-complete	ATPase MCP Penton PRO	Group 005	Large virophages	Maveriviricetes;Priklausovirales;Gulliviroviridae	10.1093/nar/gkaa946 10.1111/1462-2920.14283	10.46936/10.25585/60000587
IMG_VR_1290	IMGVR_UViG_3300027759_000455|3300027759|Ga0209296_1001019	IMG_VR v3	Metagenome	3300027759	Linear	22707	Clustered	IMG_VR_0605	NA	NA	NA	NA	NA	10.1093/nar/gkaa946 10.1111/1462-2920.14283	10.46936/10.25585/60000587
IMG_VR_1291	IMGVR_UViG_3300027760_000005|3300027760|Ga0209598_10000507	IMG_VR v3	Metagenome	3300027760	DTR	30914	Clustered	IMG_VR_0548	NA	NA	NA	NA	NA	10.1093/nar/gkaa946 10.1111/1462-2920.14283	10.46936/10.25585/60000587
IMG_VR_1292	IMGVR_UViG_3300027763_000021|3300027763|Ga0209088_10000481	IMG_VR v3	Metagenome	3300027763	DTR	27984	Seed	IMG_VR_1292	Complete	ATPase MCP Penton PRO	Group 003	Aquatic virophages 2	Maveriviricetes;Priklausovirales;Burtonviroviridae	10.1093/nar/gkaa946 10.1111/1462-2920.14283	10.46936/10.25585/60000587
IMG_VR_1293	IMGVR_UViG_3300027763_000272|3300027763|Ga0209088_10000805	IMG_VR v3	Metagenome	3300027763	Linear	21328	Clustered	IMG_VR_0577	NA	NA	NA	NA	NA	10.1093/nar/gkaa946 10.1111/1462-2920.14283	10.46936/10.25585/60000587
IMG_VR_1294	IMGVR_UViG_3300027763_000442|3300027763|Ga0209088_10001680	IMG_VR v3	Metagenome	3300027763	Linear	14088	Clustered	IMG_VR_1340	NA	NA	NA	NA	NA	10.1093/nar/gkaa946 10.1111/1462-2920.14283	10.46936/10.25585/60000587
IMG_VR_1295	IMGVR_UViG_3300027764_000016|3300027764|Ga0209134_10000045	IMG_VR v3	Metagenome	3300027764	Linear	33544	Seed	IMG_VR_1295	Near-complete	ATPase MCP Penton PRO	Group 005	Large virophages	Maveriviricetes;Priklausovirales;Gulliviroviridae	10.1093/nar/gkaa946 10.1128/AEM.00140-20	10.46936/10.25585/60000744
IMG_VR_1296	IMGVR_UViG_3300027768_000005|3300027768|Ga0209772_10000444	IMG_VR v3	Metagenome	3300027768	Linear	10378	Seed	IMG_VR_1296	Partial	ATPase MCP Penton PRO	NA	NA	Maveriviricetes;Mividavirales;Sputniviroviridae	10.1038/s41396-018-0334-3 10.1093/nar/gkaa946	10.46936/10.25585/60000575
IMG_VR_1297	IMGVR_UViG_3300027769_000111|3300027769|Ga0209770_10000312	IMG_VR v3	Metagenome	3300027769	DTR	26948	Seed	IMG_VR_1297	Complete	ATPase MCP Penton PRO	Group 001	Aquatic virophages 1	Maveriviricetes;Priklausovirales;Omnilimnoviroviridae	10.1093/nar/gkaa946 10.1128/AEM.00140-20	10.46936/10.25585/60000744
IMG_VR_1298	IMGVR_UViG_3300027769_000411|3300027769|Ga0209770_10003509	IMG_VR v3	Metagenome	3300027769	Linear	7629	Seed	IMG_VR_1298	Partial	ATPase MCP Penton PRO	NA	NA	Maveriviricetes;Unclassified	10.1093/nar/gkaa946 10.1128/AEM.00140-20	10.46936/10.25585/60000744
IMG_VR_1299	IMGVR_UViG_3300027777_000086|3300027777|Ga0209829_10000566	IMG_VR v3	Metagenome	3300027777	Linear	32754	Clustered	IMG_VR_1361	NA	NA	NA	NA	NA	10.1093/nar/gkaa946 10.1111/1462-2920.14283	10.46936/10.25585/60000587
IMG_VR_1300	IMGVR_UViG_3300027777_000112|3300027777|Ga0209829_10000725	IMG_VR v3	Metagenome	3300027777	Linear	28762	Clustered	IMG_VR_0771	NA	NA	NA	NA	NA	10.1093/nar/gkaa946 10.1111/1462-2920.14283	10.46936/10.25585/60000587
IMG_VR_1301	IMGVR_UViG_3300027777_000123|3300027777|Ga0209829_10000789	IMG_VR v3	Metagenome	3300027777	DTR	27513	Seed	IMG_VR_1301	Complete	ATPase MCP Penton PRO	Group 001	Aquatic virophages 1	Maveriviricetes;Priklausovirales;Omnilimnoviroviridae	10.1093/nar/gkaa946 10.1111/1462-2920.14283	10.46936/10.25585/60000587
IMG_VR_1302	IMGVR_UViG_3300027777_000157|3300027777|Ga0209829_10001083	IMG_VR v3	Metagenome	3300027777	Linear	22967	Clustered	IMG_VR_1365	NA	NA	NA	NA	NA	10.1093/nar/gkaa946 10.1111/1462-2920.14283	10.46936/10.25585/60000587
IMG_VR_1303	IMGVR_UViG_3300027777_000242|3300027777|Ga0209829_10001796	IMG_VR v3	Metagenome	3300027777	Linear	16915	Clustered	IMG_VR_0712	NA	NA	NA	NA	NA	10.1093/nar/gkaa946 10.1111/1462-2920.14283	10.46936/10.25585/60000587
IMG_VR_1304	IMGVR_UViG_3300027782_000243|3300027782|Ga0209500_10000566	IMG_VR v3	Metagenome	3300027782	Linear	31513	Seed	IMG_VR_1304	Near-complete	ATPase MCP Penton PRO	Group 001	Aquatic virophages 1	Maveriviricetes;Priklausovirales;Omnilimnoviroviridae	10.1093/nar/gkaa946 10.1111/1462-2920.14283	10.46936/10.25585/60000587
IMG_VR_1305	IMGVR_UViG_3300027782_000385|3300027782|Ga0209500_10000977	IMG_VR v3	Metagenome	3300027782	DTR	22567	Clustered	IMG_VR_0605	NA	NA	NA	NA	NA	10.1093/nar/gkaa946 10.1111/1462-2920.14283	10.46936/10.25585/60000587
IMG_VR_1306	IMGVR_UViG_3300027793_000231|3300027793|Ga0209972_10000880	IMG_VR v3	Metagenome	3300027793	DTR	28838	Seed	IMG_VR_1306	Complete	ATPase MCP Penton PRO	Group 004	SW01 virophages	Maveriviricetes;Priklausovirales;Dishuiviroviridae	10.1093/nar/gkaa946 10.3389/fmicb.2019.02081	10.46936/10.25585/60000686
IMG_VR_1307	IMGVR_UViG_3300027793_000257|3300027793|Ga0209972_10001001	IMG_VR v3	Metagenome	3300027793	Linear	26110	Clustered	IMG_VR_0420	NA	NA	NA	NA	NA	10.1093/nar/gkaa946 10.3389/fmicb.2019.02081	10.46936/10.25585/60000686
IMG_VR_1308	IMGVR_UViG_3300027793_000538|3300027793|Ga0209972_10002927	IMG_VR v3	Metagenome	3300027793	Linear	13622	Seed	IMG_VR_1308	Partial	ATPase MCP Penton PRO	NA	NA	Maveriviricetes;Priklausovirales;Dishuiviroviridae	10.1093/nar/gkaa946 10.3389/fmicb.2019.02081	10.46936/10.25585/60000686
IMG_VR_1309	IMGVR_UViG_3300027797_000142|3300027797|Ga0209107_10000459	IMG_VR v3	Metagenome	3300027797	Linear	23772	Seed	IMG_VR_1309	Partial	MCP Penton PRO	NA	NA	Maveriviricetes;Priklausovirales;Omnilimnoviroviridae	10.1016/j.jglr.2019.01.004 10.1093/nar/gkaa946	10.46936/10.25585/60001394
IMG_VR_1310	IMGVR_UViG_3300027816_000315|3300027816|Ga0209990_10000827	IMG_VR v3	Metagenome	3300027816	DTR	28838	Clustered	IMG_VR_1306	NA	NA	NA	NA	NA	10.1093/nar/gkaa946 10.3389/fmicb.2019.02081	10.46936/10.25585/60000686
IMG_VR_1311	IMGVR_UViG_3300027816_000794|3300027816|Ga0209990_10002755	IMG_VR v3	Metagenome	3300027816	Linear	13447	Clustered	IMG_VR_1308	NA	NA	NA	NA	NA	10.1093/nar/gkaa946 10.3389/fmicb.2019.02081	10.46936/10.25585/60000686
IMG_VR_1312	IMGVR_UViG_3300027816_001159|3300027816|Ga0209990_10005301	IMG_VR v3	Metagenome	3300027816	Linear	8819	Seed	IMG_VR_1312	Partial	MCP Penton PRO	NA	NA	Maveriviricetes;Unclassified	10.1093/nar/gkaa946 10.3389/fmicb.2019.02081	10.46936/10.25585/60000686
IMG_VR_1313	IMGVR_UViG_3300027832_000142|3300027832|Ga0209491_10005087	IMG_VR v3	Metagenome	3300027832	Linear	19594	Seed	IMG_VR_1313	Partial	MCP Penton PRO	NA	NA	Maveriviricetes;Priklausovirales;Dishuiviroviridae	10.1093/nar/gkaa946 10.1101/2021.12.17.473166	10.46936/10.25585/60000788
IMG_VR_1314	IMGVR_UViG_3300027848_000142|3300027848|Ga0209390_10005535	IMG_VR v3	Metagenome	3300027848	Linear	17766	Clustered	IMG_VR_1313	NA	NA	NA	NA	NA	10.1093/nar/gkaa946 10.1101/2021.12.17.473166	10.46936/10.25585/60000788
IMG_VR_1317	IMGVR_UViG_3300027879_000005|3300027879|Ga0209169_10001434	IMG_VR v3	Metagenome	3300027879	Linear	14546	Clustered	IMG_VR_0216	NA	NA	NA	NA	NA	10.1093/nar/gkaa946 10.3389/fmicb.2020.00616	10.46936/10.25585/60007639
IMG_VR_1318	IMGVR_UViG_3300027896_000299|3300027896|Ga0209777_10003564	IMG_VR v3	Metagenome	3300027896	Linear	19142	Seed	IMG_VR_1318	Partial	ATPase MCP Penton PRO	NA	NA	Maveriviricetes;Unclassified	10.1093/nar/gkaa946	10.46936/10.25585/60000572
IMG_VR_1319	IMGVR_UViG_3300027896_000327|3300027896|Ga0209777_10004125	IMG_VR v3	Metagenome	3300027896	Linear	17411	Seed	IMG_VR_1319	Partial	ATPase MCP Penton PRO	NA	NA	Maveriviricetes;Unclassified	10.1093/nar/gkaa946	10.46936/10.25585/60000572
IMG_VR_1320	IMGVR_UViG_3300027896_000519|3300027896|Ga0209777_10007886	IMG_VR v3	Metagenome	3300027896	Linear	11727	Seed	IMG_VR_1320	Partial	MCP Penton PRO	NA	NA	Maveriviricetes;Priklausovirales;Omnilimnoviroviridae	10.1093/nar/gkaa946	10.46936/10.25585/60000572
IMG_VR_1321	IMGVR_UViG_3300027899_000086|3300027899|Ga0209668_10000286	IMG_VR v3	Metagenome	3300027899	Linear	20766	Seed	IMG_VR_1321	Partial	ATPase MCP Penton PRO	NA	NA	Maveriviricetes;Mividavirales;Sputniviroviridae	10.1093/nar/gkaa946 10.1126/science.aal4657	10.46936/10.25585/60000572
IMG_VR_1322	IMGVR_UViG_3300027899_000104|3300027899|Ga0209668_10000401	IMG_VR v3	Metagenome	3300027899	Linear	17783	Seed	IMG_VR_1322	Partial	ATPase MCP Penton PRO	NA	NA	Maveriviricetes;Mividavirales;Sputniviroviridae	10.1093/nar/gkaa946 10.1126/science.aal4657	10.46936/10.25585/60000572
IMG_VR_1323	IMGVR_UViG_3300027899_000107|3300027899|Ga0209668_10000412	IMG_VR v3	Metagenome	3300027899	Linear	17596	Seed	IMG_VR_1323	Partial	NA	NA	NA	NA	10.1093/nar/gkaa946 10.1126/science.aal4657	10.46936/10.25585/60000572
IMG_VR_1324	IMGVR_UViG_3300027899_000148|3300027899|Ga0209668_10000781	IMG_VR v3	Metagenome	3300027899	Linear	13219	Seed	IMG_VR_1324	Partial	ATPase MCP Penton PRO	NA	NA	Maveriviricetes;Unclassified	10.1093/nar/gkaa946 10.1126/science.aal4657	10.46936/10.25585/60000572
IMG_VR_1325	IMGVR_UViG_3300027899_000183|3300027899|Ga0209668_10001419	IMG_VR v3	Metagenome	3300027899	Linear	10243	Seed	IMG_VR_1325	Partial	ATPase MCP Penton	NA	NA	Maveriviricetes;Priklausovirales;Omnilimnoviroviridae	10.1093/nar/gkaa946 10.1126/science.aal4657	10.46936/10.25585/60000572
IMG_VR_1326	IMGVR_UViG_3300027917_000170|3300027917|Ga0209536_100003616	IMG_VR v3	Metagenome	3300027917	Linear	24753	Seed	IMG_VR_1326	Near-complete	ATPase MCP Penton PRO	Group 001	Aquatic virophages 1	Maveriviricetes;Priklausovirales;Omnilimnoviroviridae	10.1093/nar/gkaa946 10.1186/s40168-015-0077-6	10.46936/10.25585/60007583
IMG_VR_1327	IMGVR_UViG_3300027963_000220|3300027963|Ga0209400_1000603	IMG_VR v3	Metagenome	3300027963	Linear	31314	Clustered	IMG_VR_1283	NA	NA	NA	NA	NA	10.1093/nar/gkaa946 10.1111/1462-2920.14283	10.46936/10.25585/60000587
IMG_VR_1328	IMGVR_UViG_3300027963_000383|3300027963|Ga0209400_1001193	IMG_VR v3	Metagenome	3300027963	Linear	21558	Clustered	IMG_VR_0584	NA	NA	NA	NA	NA	10.1093/nar/gkaa946 10.1111/1462-2920.14283	10.46936/10.25585/60000587
IMG_VR_1329	IMGVR_UViG_3300027963_000494|3300027963|Ga0209400_1001691	IMG_VR v3	Metagenome	3300027963	Linear	17359	Seed	IMG_VR_1329	Partial	ATPase MCP Penton PRO	NA	NA	Maveriviricetes;Unclassified	10.1093/nar/gkaa946 10.1111/1462-2920.14283	10.46936/10.25585/60000587
IMG_VR_1330	IMGVR_UViG_3300027969_000024|3300027969|Ga0209191_1000445	IMG_VR v3	Metagenome	3300027969	DTR	32223	Clustered	IMG_VR_0600	NA	NA	NA	NA	NA	10.1093/nar/gkaa946 10.1111/1462-2920.14283	10.46936/10.25585/60000587
IMG_VR_1331	IMGVR_UViG_3300027969_000248|3300027969|Ga0209191_1000380	IMG_VR v3	Metagenome	3300027969	Linear	35156	Seed	IMG_VR_1331	Near-complete	ATPase MCP Penton PRO	Group 005	Large virophages	Maveriviricetes;Priklausovirales;Gulliviroviridae	10.1093/nar/gkaa946 10.1111/1462-2920.14283	10.46936/10.25585/60000587
IMG_VR_1332	IMGVR_UViG_3300027969_000304|3300027969|Ga0209191_1000492	IMG_VR v3	Metagenome	3300027969	Linear	30479	Clustered	IMG_VR_1289	NA	NA	NA	NA	NA	10.1093/nar/gkaa946 10.1111/1462-2920.14283	10.46936/10.25585/60000587
IMG_VR_1333	IMGVR_UViG_3300027969_000317|3300027969|Ga0209191_1000512	IMG_VR v3	Metagenome	3300027969	Linear	29693	Clustered	IMG_VR_0769	NA	NA	NA	NA	NA	10.1093/nar/gkaa946 10.1111/1462-2920.14283	10.46936/10.25585/60000587
IMG_VR_1334	IMGVR_UViG_3300027969_000370|3300027969|Ga0209191_1000619	IMG_VR v3	Metagenome	3300027969	Linear	26840	Clustered	IMG_VR_0562	NA	NA	NA	NA	NA	10.1093/nar/gkaa946 10.1111/1462-2920.14283	10.46936/10.25585/60000587
IMG_VR_1335	IMGVR_UViG_3300027969_000500|3300027969|Ga0209191_1000943	IMG_VR v3	Metagenome	3300027969	Linear	20171	Clustered	IMG_VR_0560	NA	NA	NA	NA	NA	10.1093/nar/gkaa946 10.1111/1462-2920.14283	10.46936/10.25585/60000587
IMG_VR_1337	IMGVR_UViG_3300027971_000015|3300027971|Ga0209401_1000364	IMG_VR v3	Metagenome	3300027971	DTR	30914	Clustered	IMG_VR_0548	NA	NA	NA	NA	NA	10.1093/nar/gkaa946 10.1111/1462-2920.14283	10.46936/10.25585/60000587
IMG_VR_1338	IMGVR_UViG_3300027971_000188|3300027971|Ga0209401_1000486	IMG_VR v3	Metagenome	3300027971	Linear	26770	Seed	IMG_VR_1338	Near-complete	ATPase MCP Penton PRO	Group 003	Aquatic virophages 2	Maveriviricetes;Priklausovirales;Burtonviroviridae	10.1093/nar/gkaa946 10.1111/1462-2920.14283	10.46936/10.25585/60000587
IMG_VR_1339	IMGVR_UViG_3300027972_000064|3300027972|Ga0209079_10000297	IMG_VR v3	Metagenome	3300027972	Linear	20961	Clustered	IMG_VR_0452	NA	NA	NA	NA	NA	10.1093/nar/gkaa946 10.1186/s40168-018-0522-4	10.46936/10.25585/60000718
IMG_VR_1340	IMGVR_UViG_3300027973_000181|3300027973|Ga0209298_10000424	IMG_VR v3	Metagenome	3300027973	DTR	28069	Seed	IMG_VR_1340	Complete	ATPase MCP Penton PRO	Group 001	Aquatic virophages 1	Maveriviricetes;Priklausovirales;Omnilimnoviroviridae	10.1093/nar/gkaa946 10.1111/1462-2920.14283	10.46936/10.25585/60000587
IMG_VR_1341	IMGVR_UViG_3300027973_000254|3300027973|Ga0209298_10000796	IMG_VR v3	Metagenome	3300027973	Linear	21222	Clustered	IMG_VR_0542	NA	NA	NA	NA	NA	10.1093/nar/gkaa946 10.1111/1462-2920.14283	10.46936/10.25585/60000587
IMG_VR_1342	IMGVR_UViG_3300027973_000290|3300027973|Ga0209298_10001026	IMG_VR v3	Metagenome	3300027973	Linear	18528	Seed	IMG_VR_1342	Partial	ATPase MCP Penton PRO	NA	NA	Maveriviricetes;Priklausovirales;Omnilimnoviroviridae	10.1093/nar/gkaa946 10.1111/1462-2920.14283	10.46936/10.25585/60000587
IMG_VR_1343	IMGVR_UViG_3300027974_000208|3300027974|Ga0209299_1000638	IMG_VR v3	Metagenome	3300027974	Linear	19952	Clustered	IMG_VR_0542	NA	NA	NA	NA	NA	10.1093/nar/gkaa946 10.1111/1462-2920.14283	10.46936/10.25585/60000587
IMG_VR_1346	IMGVR_UViG_3300028071_000013|3300028071|Ga0255216_1000166	IMG_VR v3	Metagenome	3300028071	Linear	16557	Clustered	IMG_VR_1247	NA	NA	NA	NA	NA	10.1093/nar/gkaa946	10.46936/10.25585/60000873
IMG_VR_1347	IMGVR_UViG_3300028073_000096|3300028073|Ga0255180_1000708	IMG_VR v3	Metagenome	3300028073	Linear	10791	Clustered	IMG_VR_1243	NA	NA	NA	NA	NA	10.1093/nar/gkaa946	10.46936/10.25585/60000873
IMG_VR_1350	IMGVR_UViG_3300028361_000268|3300028361|Ga0306872_100732	IMG_VR v3	Metagenome	3300028361	Linear	11711	Seed	IMG_VR_1350	Partial	MCP Penton PRO	NA	NA	Maveriviricetes;Unclassified	10.1093/nar/gkaa946 10.3389/fmicb.2021.674758	10.46936/10.25585/60001034
IMG_VR_1351	IMGVR_UViG_3300028361_000270|3300028361|Ga0306872_100751	IMG_VR v3	Metagenome	3300028361	Linear	11474	Clustered	IMG_VR_1378	NA	NA	NA	NA	NA	10.1093/nar/gkaa946 10.3389/fmicb.2021.674758	10.46936/10.25585/60001034
IMG_VR_1352	IMGVR_UViG_3300028363_000013|3300028363|Ga0306877_1000275	IMG_VR v3	Metagenome	3300028363	Linear	19220	Clustered	Organic_Lake_virophage	NA	NA	NA	NA	NA	10.1093/nar/gkaa946 10.1186/s40168-018-0495-3	10.46936/10.25585/60001034
IMG_VR_1353	IMGVR_UViG_3300028364_000329|3300028364|Ga0306898_1000760	IMG_VR v3	Metagenome	3300028364	Linear	11474	Clustered	IMG_VR_1378	NA	NA	NA	NA	NA	10.1093/nar/gkaa946 10.1186/s40168-018-0495-3	10.46936/10.25585/60001034
IMG_VR_1354	IMGVR_UViG_3300028364_000350|3300028364|Ga0306898_1000839	IMG_VR v3	Metagenome	3300028364	Linear	10731	Clustered	IMG_VR_1350	NA	NA	NA	NA	NA	10.1093/nar/gkaa946 10.1186/s40168-018-0495-3	10.46936/10.25585/60001034
IMG_VR_1355	IMGVR_UViG_3300028365_000071|3300028365|Ga0306883_101020	IMG_VR v3	Metagenome	3300028365	Linear	8271	Clustered	IMG_VR_1378	NA	NA	NA	NA	NA	10.1093/nar/gkaa946 10.1186/s40168-018-0495-3	10.46936/10.25585/60001034
IMG_VR_1356	IMGVR_UViG_3300028369_000033|3300028369|Ga0306896_1000083	IMG_VR v3	Metagenome	3300028369	Linear	19311	Clustered	IMG_VR_1378	NA	NA	NA	NA	NA	10.1093/nar/gkaa946 10.1186/s40168-018-0495-3	10.46936/10.25585/60001034
IMG_VR_1357	IMGVR_UViG_3300028370_000084|3300028370|Ga0306871_1001103	IMG_VR v3	Metagenome	3300028370	Linear	9898	Clustered	IMG_VR_1378	NA	NA	NA	NA	NA	10.1093/nar/gkaa946 10.3389/fmicb.2021.674758	10.46936/10.25585/60001034
IMG_VR_1358	IMGVR_UViG_3300028373_000011|3300028373|Ga0306897_1000029	IMG_VR v3	Metagenome	3300028373	Concatemer	33744	Clustered	IMG_VR_1378	NA	NA	NA	NA	NA	10.1093/nar/gkaa946 10.1186/s40168-018-0495-3	10.46936/10.25585/60001034
IMG_VR_1359	IMGVR_UViG_3300028375_000017|3300028375|Ga0306865_1000350	IMG_VR v3	Metagenome	3300028375	Linear	20183	Clustered	Organic_Lake_virophage	NA	NA	NA	NA	NA	10.1093/nar/gkaa946 10.3389/fmicb.2021.674758	10.46936/10.25585/60001034
IMG_VR_1360	IMGVR_UViG_3300028376_000043|3300028376|Ga0306912_1000534	IMG_VR v3	Metagenome	3300028376	Linear	21984	Seed	IMG_VR_1360	Partial	ATPase MCP Penton PRO	NA	NA	Maveriviricetes;Priklausovirales;Dishuiviroviridae	10.1093/nar/gkaa946 10.3389/fmicb.2021.674758	10.46936/10.25585/60001034
IMG_VR_1361	IMGVR_UViG_3300028392_000193|3300028392|Ga0304729_1000385	IMG_VR v3	Metagenome	3300028392	Linear	33366	Seed	IMG_VR_1361	Near-complete	ATPase MCP Penton PRO	Group 005	Large virophages	Maveriviricetes;Priklausovirales;Gulliviroviridae	10.1093/nar/gkaa946 10.1111/1462-2920.14283	10.46936/10.25585/60000587
IMG_VR_1362	IMGVR_UViG_3300028392_000219|3300028392|Ga0304729_1000458	IMG_VR v3	Metagenome	3300028392	Linear	30468	Clustered	IMG_VR_1276	NA	NA	NA	NA	NA	10.1093/nar/gkaa946 10.1111/1462-2920.14283	10.46936/10.25585/60000587
IMG_VR_1363	IMGVR_UViG_3300028392_000257|3300028392|Ga0304729_1000588	IMG_VR v3	Metagenome	3300028392	Linear	26495	Clustered	IMG_VR_0765	NA	NA	NA	NA	NA	10.1093/nar/gkaa946 10.1111/1462-2920.14283	10.46936/10.25585/60000587
IMG_VR_1364	IMGVR_UViG_3300028392_000259|3300028392|Ga0304729_1000593	IMG_VR v3	Metagenome	3300028392	DTR	26192	Clustered	IMG_VR_0712	NA	NA	NA	NA	NA	10.1093/nar/gkaa946 10.1111/1462-2920.14283	10.46936/10.25585/60000587
IMG_VR_1365	IMGVR_UViG_3300028392_000302|3300028392|Ga0304729_1000731	IMG_VR v3	Metagenome	3300028392	Linear	23018	Seed	IMG_VR_1365	Partial	ATPase MCP Penton PRO	NA	NA	Maveriviricetes;Priklausovirales;Dishuiviroviridae	10.1093/nar/gkaa946 10.1111/1462-2920.14283	10.46936/10.25585/60000587
IMG_VR_1366	IMGVR_UViG_3300028392_000448|3300028392|Ga0304729_1001420	IMG_VR v3	Metagenome	3300028392	Linear	15860	Seed	IMG_VR_1366	Partial	ATPase MCP Penton PRO	NA	NA	Maveriviricetes;Unclassified	10.1093/nar/gkaa946 10.1111/1462-2920.14283	10.46936/10.25585/60000587
IMG_VR_1367	IMGVR_UViG_3300028392_000452|3300028392|Ga0304729_1001443	IMG_VR v3	Metagenome	3300028392	Linear	15653	Seed	IMG_VR_1367	Partial	ATPase MCP Penton PRO	NA	NA	Maveriviricetes;Mividavirales;Sputniviroviridae	10.1093/nar/gkaa946 10.1111/1462-2920.14283	10.46936/10.25585/60000587
IMG_VR_1368	IMGVR_UViG_3300028393_000290|3300028393|Ga0304728_1000714	IMG_VR v3	Metagenome	3300028393	Linear	26872	Clustered	IMG_VR_1254	NA	NA	NA	NA	NA	10.1093/nar/gkaa946 10.1111/1462-2920.14283	10.46936/10.25585/60000587
IMG_VR_1369	IMGVR_UViG_3300028393_000367|3300028393|Ga0304728_1000957	IMG_VR v3	Metagenome	3300028393	Linear	22291	Seed	IMG_VR_1369	Partial	ATPase MCP Penton PRO	NA	NA	Maveriviricetes;Priklausovirales;Dishuiviroviridae	10.1093/nar/gkaa946 10.1111/1462-2920.14283	10.46936/10.25585/60000587
IMG_VR_1370	IMGVR_UViG_3300028393_000422|3300028393|Ga0304728_1001194	IMG_VR v3	Metagenome	3300028393	Linear	18869	Clustered	IMG_VR_1144	NA	NA	NA	NA	NA	10.1093/nar/gkaa946 10.1111/1462-2920.14283	10.46936/10.25585/60000587
IMG_VR_1371	IMGVR_UViG_3300028393_000803|3300028393|Ga0304728_1003158	IMG_VR v3	Metagenome	3300028393	Linear	9998	Clustered	IMG_VR_0592	NA	NA	NA	NA	NA	10.1093/nar/gkaa946 10.1111/1462-2920.14283	10.46936/10.25585/60000587
IMG_VR_1372	IMGVR_UViG_3300028394_000224|3300028394|Ga0304730_1000571	IMG_VR v3	Metagenome	3300028394	Linear	31385	Clustered	IMG_VR_1283	NA	NA	NA	NA	NA	10.1093/nar/gkaa946 10.1111/1462-2920.14283	10.46936/10.25585/60000587
IMG_VR_1373	IMGVR_UViG_3300028394_001026|3300028394|Ga0304730_1006986	IMG_VR v3	Metagenome	3300028394	Linear	6990	Clustered	IMG_VR_0731	NA	NA	NA	NA	NA	10.1093/nar/gkaa946 10.1111/1462-2920.14283	10.46936/10.25585/60000587
IMG_VR_1374	IMGVR_UViG_3300028394_001105|3300028394|Ga0304730_1008366	IMG_VR v3	Metagenome	3300028394	Linear	6276	Clustered	IMG_VR_1287	NA	NA	NA	NA	NA	10.1093/nar/gkaa946 10.1111/1462-2920.14283	10.46936/10.25585/60000587
IMG_VR_1375	IMGVR_UViG_3300028402_000055|3300028402|Ga0306875_100738	IMG_VR v3	Metagenome	3300028402	Linear	9672	Clustered	IMG_VR_1378	NA	NA	NA	NA	NA	10.1093/nar/gkaa946 10.1186/s40168-018-0495-3	10.46936/10.25585/60001034
IMG_VR_1376	IMGVR_UViG_3300028408_000012|3300028408|Ga0306864_1000722	IMG_VR v3	Metagenome	3300028408	Linear	14761	Clustered	Organic_Lake_virophage	NA	NA	NA	NA	NA	10.1093/nar/gkaa946 10.3389/fmicb.2021.674758	10.46936/10.25585/60001034
IMG_VR_1377	IMGVR_UViG_3300028410_000077|3300028410|Ga0306866_1000223	IMG_VR v3	Metagenome	3300028410	Linear	20183	Clustered	Organic_Lake_virophage	NA	NA	NA	NA	NA	10.1093/nar/gkaa946 10.3389/fmicb.2021.674758	10.46936/10.25585/60001034
IMG_VR_1378	IMGVR_UViG_3300028413_000020|3300028413|Ga0306870_1000093	IMG_VR v3	Metagenome	3300028413	DTR	23230	Seed	IMG_VR_1378	Complete	ATPase MCP Penton PRO	Group 001	Aquatic virophages 1	Maveriviricetes;Priklausovirales;Omnilimnoviroviridae	10.1093/nar/gkaa946 10.3389/fmicb.2021.674758	10.46936/10.25585/60001034
IMG_VR_1388	IMGVR_UViG_3300028800_000304|3300028800|Ga0265338_10002960	IMG_VR v3	Metagenome	3300028800	Linear	24651	Seed	IMG_VR_1388	Partial	ATPase MCP Penton PRO	NA	NA	Maveriviricetes;Unclassified	10.1007/s11104-021-05239-7 10.1093/nar/gkaa946	10.46936/jejc.proj.2015.49017/60005777
IMG_VR_1389	IMGVR_UViG_3300028854_000052|3300028854|Ga0302268_1000501	IMG_VR v3	Metagenome	3300028854	Linear	24415	Clustered	IMG_VR_1399	NA	NA	NA	NA	NA	10.1093/nar/gkaa946	10.46936/fics.proj.2017.49950/60006215
IMG_VR_1390	IMGVR_UViG_3300028854_000075|3300028854|Ga0302268_1000876	IMG_VR v3	Metagenome	3300028854	Linear	18261	Clustered	IMG_VR_1397	NA	NA	NA	NA	NA	10.1093/nar/gkaa946	10.46936/fics.proj.2017.49950/60006215
IMG_VR_1391	IMGVR_UViG_3300028873_000073|3300028873|Ga0302197_10001857	IMG_VR v3	Metagenome	3300028873	Linear	19829	Clustered	IMG_VR_1397	NA	NA	NA	NA	NA	10.1093/nar/gkaa946	10.46936/fics.proj.2017.49950/60006215
IMG_VR_1392	IMGVR_UViG_3300028909_000093|3300028909|Ga0302200_10001862	IMG_VR v3	Metagenome	3300028909	Linear	19186	Clustered	IMG_VR_1397	NA	NA	NA	NA	NA	10.1093/nar/gkaa946	10.46936/fics.proj.2017.49950/60006215
IMG_VR_1393	IMGVR_UViG_3300029817_000012|3300029817|Ga0247275_1001312	IMG_VR v3	Metagenome	3300029817	Linear	20772	Seed	IMG_VR_1393	Near-complete	ATPase MCP Penton PRO	Group 002	Sputnik virophages	Maveriviricetes;Mividavirales;Sputniviroviridae	10.1093/nar/gkaa946
IMG_VR_1394	IMGVR_UViG_3300029908_000205|3300029908|Ga0311341_10003650	IMG_VR v3	Metagenome	3300029908	Linear	18388	Clustered	IMG_VR_1401	NA	NA	NA	NA	NA	10.1093/nar/gkaa946	10.46936/fics.proj.2017.49950/60006215
IMG_VR_1395	IMGVR_UViG_3300029911_000197|3300029911|Ga0311361_10011007	IMG_VR v3	Metagenome	3300029911	DTR	17754	Seed	IMG_VR_1395	Complete	ATPase MCP Penton PRO	Group 002	Sputnik virophages	Maveriviricetes;Mividavirales;Sputniviroviridae	10.1093/nar/gkaa946	10.46936/fics.proj.2017.49950/60006215
IMG_VR_1396	IMGVR_UViG_3300029911_000246|3300029911|Ga0311361_10016105	IMG_VR v3	Metagenome	3300029911	Linear	14170	Clustered	IMG_VR_1397	NA	NA	NA	NA	NA	10.1093/nar/gkaa946	10.46936/fics.proj.2017.49950/60006215
IMG_VR_1397	IMGVR_UViG_3300029914_000136|3300029914|Ga0311359_10003347	IMG_VR v3	Metagenome	3300029914	Linear	24456	Seed	IMG_VR_1397	Partial	ATPase MCP Penton PRO	NA	NA	Maveriviricetes;Unclassified	10.1093/nar/gkaa946	10.46936/fics.proj.2017.49950/60006215
IMG_VR_1398	IMGVR_UViG_3300029914_000138|3300029914|Ga0311359_10003355	IMG_VR v3	Metagenome	3300029914	Linear	24415	Clustered	IMG_VR_1399	NA	NA	NA	NA	NA	10.1093/nar/gkaa946	10.46936/fics.proj.2017.49950/60006215
IMG_VR_1399	IMGVR_UViG_3300029922_000291|3300029922|Ga0311363_10005898	IMG_VR v3	Metagenome	3300029922	Linear	24527	Seed	IMG_VR_1399	Near-complete	ATPase MCP Penton PRO	Group 001	Aquatic virophages 1	Maveriviricetes;Priklausovirales;Omnilimnoviroviridae	10.1093/nar/gkaa946	10.46936/fics.proj.2017.49950/60006215
IMG_VR_1400	IMGVR_UViG_3300029922_000303|3300029922|Ga0311363_10006345	IMG_VR v3	Metagenome	3300029922	Linear	23606	Clustered	IMG_VR_1397	NA	NA	NA	NA	NA	10.1093/nar/gkaa946	10.46936/fics.proj.2017.49950/60006215
IMG_VR_1401	IMGVR_UViG_3300029922_000304|3300029922|Ga0311363_10006349	IMG_VR v3	Metagenome	3300029922	Linear	23600	Seed	IMG_VR_1401	Partial	ATPase MCP Penton PRO	NA	NA	Maveriviricetes;Mividavirales;Sputniviroviridae	10.1093/nar/gkaa946	10.46936/fics.proj.2017.49950/60006215
IMG_VR_1402	IMGVR_UViG_3300029922_000381|3300029922|Ga0311363_10010206	IMG_VR v3	Metagenome	3300029922	Linear	17992	Clustered	IMG_VR_1395	NA	NA	NA	NA	NA	10.1093/nar/gkaa946	10.46936/fics.proj.2017.49950/60006215
IMG_VR_1403	IMGVR_UViG_3300029952_000169|3300029952|Ga0311346_10007392	IMG_VR v3	Metagenome	3300029952	Linear	19186	Clustered	IMG_VR_1397	NA	NA	NA	NA	NA	10.1093/nar/gkaa946	10.46936/fics.proj.2017.49950/60006215
IMG_VR_1404	IMGVR_UViG_3300029955_000140|3300029955|Ga0311342_10003711	IMG_VR v3	Metagenome	3300029955	Linear	24057	Clustered	IMG_VR_1399	NA	NA	NA	NA	NA	10.1093/nar/gkaa946	10.46936/fics.proj.2017.49950/60006215
IMG_VR_1405	IMGVR_UViG_3300029955_000148|3300029955|Ga0311342_10003892	IMG_VR v3	Metagenome	3300029955	Linear	23390	Clustered	IMG_VR_1397	NA	NA	NA	NA	NA	10.1093/nar/gkaa946	10.46936/fics.proj.2017.49950/60006215
IMG_VR_1406	IMGVR_UViG_3300029985_000159|3300029985|Ga0302280_1001051	IMG_VR v3	Metagenome	3300029985	Linear	23595	Clustered	IMG_VR_1397	NA	NA	NA	NA	NA	10.1093/nar/gkaa946	10.46936/fics.proj.2017.49950/60006215
IMG_VR_1407	IMGVR_UViG_3300029985_000199|3300029985|Ga0302280_1001657	IMG_VR v3	Metagenome	3300029985	Linear	17992	Clustered	IMG_VR_1395	NA	NA	NA	NA	NA	10.1093/nar/gkaa946	10.46936/fics.proj.2017.49950/60006215
IMG_VR_1408	IMGVR_UViG_3300029985_000215|3300029985|Ga0302280_1002194	IMG_VR v3	Metagenome	3300029985	Linear	15278	Clustered	IMG_VR_1401	NA	NA	NA	NA	NA	10.1093/nar/gkaa946	10.46936/fics.proj.2017.49950/60006215
IMG_VR_1409	IMGVR_UViG_3300029986_000079|3300029986|Ga0302188_10000906	IMG_VR v3	Metagenome	3300029986	Linear	24057	Clustered	IMG_VR_1399	NA	NA	NA	NA	NA	10.1093/nar/gkaa946	10.46936/fics.proj.2017.49950/60006215
IMG_VR_1410	IMGVR_UViG_3300030004_000083|3300030004|Ga0302186_10001070	IMG_VR v3	Metagenome	3300030004	Linear	23405	Clustered	IMG_VR_1397	NA	NA	NA	NA	NA	10.1093/nar/gkaa946	10.46936/fics.proj.2017.49950/60006215
IMG_VR_1411	IMGVR_UViG_3300030020_000125|3300030020|Ga0311344_10005750	IMG_VR v3	Metagenome	3300030020	Linear	19362	Clustered	IMG_VR_1399	NA	NA	NA	NA	NA	10.1093/nar/gkaa946	10.46936/fics.proj.2017.49950/60006215
IMG_VR_1412	IMGVR_UViG_3300030020_000141|3300030020|Ga0311344_10006834	IMG_VR v3	Metagenome	3300030020	Linear	17521	Clustered	IMG_VR_1397	NA	NA	NA	NA	NA	10.1093/nar/gkaa946	10.46936/fics.proj.2017.49950/60006215
IMG_VR_1413	IMGVR_UViG_3300030520_000082|3300030520|Ga0311372_10004429	IMG_VR v3	Metagenome	3300030520	Linear	32733	Seed	IMG_VR_1413	Near-complete	ATPase MCP Penton PRO	NA	NA	Maveriviricetes;Priklausovirales;Gulliviroviridae	10.1093/nar/gkaa946	10.46936/fics.proj.2017.49950/60006215
IMG_VR_1414	IMGVR_UViG_3300030688_000123|3300030688|Ga0311345_10003789	IMG_VR v3	Metagenome	3300030688	Linear	23450	Clustered	IMG_VR_1397	NA	NA	NA	NA	NA	10.1093/nar/gkaa946	10.46936/fics.proj.2017.49950/60006215
IMG_VR_1415	IMGVR_UViG_3300031208_000023|3300031208|Ga0307931_1000747	IMG_VR v3	Metagenome	3300031208	Linear	21279	Clustered	IMG_VR_1427	NA	NA	NA	NA	NA	10.1093/nar/gkaa946 10.3389/fmicb.2021.674758	10.46936/10.25585/60001034
IMG_VR_1416	IMGVR_UViG_3300031209_000023|3300031209|Ga0307955_1000462	IMG_VR v3	Metagenome	3300031209	Linear	21855	Clustered	IMG_VR_1427	NA	NA	NA	NA	NA	10.1093/nar/gkaa946 10.3389/fmicb.2021.674758	10.46936/10.25585/60001034
IMG_VR_1417	IMGVR_UViG_3300031212_000027|3300031212|Ga0307959_1000465	IMG_VR v3	Metagenome	3300031212	Linear	21279	Clustered	IMG_VR_1427	NA	NA	NA	NA	NA	10.1093/nar/gkaa946 10.3389/fmicb.2021.674758	10.46936/10.25585/60001034
IMG_VR_1418	IMGVR_UViG_3300031213_000021|3300031213|Ga0307937_1000616	IMG_VR v3	Metagenome	3300031213	Linear	21279	Clustered	IMG_VR_1427	NA	NA	NA	NA	NA	10.1093/nar/gkaa946 10.3389/fmicb.2021.674758	10.46936/10.25585/60001034
IMG_VR_1419	IMGVR_UViG_3300031214_000017|3300031214|Ga0307958_1000497	IMG_VR v3	Metagenome	3300031214	Linear	21279	Clustered	IMG_VR_1427	NA	NA	NA	NA	NA	10.1093/nar/gkaa946 10.3389/fmicb.2021.674758	10.46936/10.25585/60001034
IMG_VR_1420	IMGVR_UViG_3300031216_000080|3300031216|Ga0307980_1000374	IMG_VR v3	Metagenome	3300031216	Linear	21279	Clustered	IMG_VR_1427	NA	NA	NA	NA	NA	10.1093/nar/gkaa946 10.3389/fmicb.2021.674758	10.46936/10.25585/60001034
IMG_VR_1421	IMGVR_UViG_3300031216_000085|3300031216|Ga0307980_1000410|1-16048	IMG_VR v3	Metagenome	3300031216	Linear	16048	Seed	IMG_VR_1421	Partial	ATPase MCP Penton PRO	NA	NA	Maveriviricetes;Unclassified	10.1093/nar/gkaa946 10.3389/fmicb.2021.674758	10.46936/10.25585/60001034
IMG_VR_1422	IMGVR_UViG_3300031217_000023|3300031217|Ga0307940_1000685	IMG_VR v3	Metagenome	3300031217	Linear	21279	Clustered	IMG_VR_1427	NA	NA	NA	NA	NA	10.1093/nar/gkaa946 10.3389/fmicb.2021.674758	10.46936/10.25585/60001034
IMG_VR_1423	IMGVR_UViG_3300031220_000018|3300031220|Ga0307939_1000531	IMG_VR v3	Metagenome	3300031220	Linear	21931	Clustered	IMG_VR_1427	NA	NA	NA	NA	NA	10.1093/nar/gkaa946 10.3389/fmicb.2021.674758	10.46936/10.25585/60001034
IMG_VR_1424	IMGVR_UViG_3300031221_000051|3300031221|Ga0307948_1003164	IMG_VR v3	Metagenome	3300031221	Linear	12152	Clustered	Organic_Lake_virophage	NA	NA	NA	NA	NA	10.1093/nar/gkaa946 10.3389/fmicb.2021.674758	10.46936/10.25585/60001034
IMG_VR_1425	IMGVR_UViG_3300031223_000084|3300031223|Ga0307981_1003493	IMG_VR v3	Metagenome	3300031223	Linear	11732	Clustered	Organic_Lake_virophage	NA	NA	NA	NA	NA	10.1093/nar/gkaa946 10.3389/fmicb.2021.674758	10.46936/10.25585/60001034
IMG_VR_1426	IMGVR_UViG_3300031224_000055|3300031224|Ga0307982_1001306	IMG_VR v3	Metagenome	3300031224	Linear	20332	Seed	IMG_VR_1426	Partial	ATPase MCP Penton PRO	NA	NA	Maveriviricetes;Priklausovirales;Burtonviroviridae	10.1093/nar/gkaa946 10.3389/fmicb.2021.674758	10.46936/10.25585/60001034
IMG_VR_1427	IMGVR_UViG_3300031243_000019|3300031243|Ga0307970_1000566	IMG_VR v3	Metagenome	3300031243	Linear	22132	Seed	IMG_VR_1427	Partial	ATPase MCP Penton PRO	NA	NA	Maveriviricetes;Unclassified	10.1093/nar/gkaa946 10.3389/fmicb.2021.674758	10.46936/10.25585/60001034
IMG_VR_1428	IMGVR_UViG_3300031251_000083|3300031251|Ga0265327_10001475	IMG_VR v3	Metagenome	3300031251	Linear	29434	Seed	IMG_VR_1428	Near-complete	ATPase MCP Penton PRO	Group 001	Aquatic virophages 1	Maveriviricetes;Priklausovirales;Omnilimnoviroviridae	10.1007/s11104-021-05239-7 10.1093/nar/gkaa946	10.46936/jejc.proj.2015.49017/60005777
IMG_VR_1429	IMGVR_UViG_3300031261_000091|3300031261|Ga0302140_10004082	IMG_VR v3	Metagenome	3300031261	Linear	18563	Clustered	IMG_VR_1399	NA	NA	NA	NA	NA	10.1093/nar/gkaa946	10.46936/fics.proj.2017.49950/60006215
IMG_VR_1430	IMGVR_UViG_3300031269_000101|3300031269|Ga0307983_1000422	IMG_VR v3	Metagenome	3300031269	Linear	21937	Clustered	IMG_VR_1427	NA	NA	NA	NA	NA	10.1093/nar/gkaa946 10.3389/fmicb.2021.674758	10.46936/10.25585/60001034
IMG_VR_1431	IMGVR_UViG_3300031329_000029|3300031329|Ga0307934_1000898	IMG_VR v3	Metagenome	3300031329	Linear	20171	Clustered	IMG_VR_1427	NA	NA	NA	NA	NA	10.1093/nar/gkaa946 10.3389/fmicb.2021.674758	10.46936/10.25585/60001034
IMG_VR_1432	IMGVR_UViG_3300031329_000081|3300031329|Ga0307934_1002437	IMG_VR v3	Metagenome	3300031329	Linear	9808	Clustered	Organic_Lake_virophage	NA	NA	NA	NA	NA	10.1093/nar/gkaa946 10.3389/fmicb.2021.674758	10.46936/10.25585/60001034
IMG_VR_1433	IMGVR_UViG_3300031333_000018|3300031333|Ga0307936_1000483	IMG_VR v3	Metagenome	3300031333	Linear	21904	Clustered	IMG_VR_1427	NA	NA	NA	NA	NA	10.1093/nar/gkaa946 10.3389/fmicb.2021.674758	10.46936/10.25585/60001034
IMG_VR_1434	IMGVR_UViG_3300031334_000020|3300031334|Ga0307969_1000536	IMG_VR v3	Metagenome	3300031334	Linear	21279	Clustered	IMG_VR_1427	NA	NA	NA	NA	NA	10.1093/nar/gkaa946 10.3389/fmicb.2021.674758	10.46936/10.25585/60001034
IMG_VR_1435	IMGVR_UViG_3300031339_000052|3300031339|Ga0307932_1000264	IMG_VR v3	Metagenome	3300031339	Linear	21279	Clustered	IMG_VR_1427	NA	NA	NA	NA	NA	10.1093/nar/gkaa946 10.3389/fmicb.2021.674758	10.46936/10.25585/60001034
IMG_VR_1436	IMGVR_UViG_3300031339_000154|3300031339|Ga0307932_1001435	IMG_VR v3	Metagenome	3300031339	Linear	9536	Clustered	Organic_Lake_virophage	NA	NA	NA	NA	NA	10.1093/nar/gkaa946 10.3389/fmicb.2021.674758	10.46936/10.25585/60001034
IMG_VR_1437	IMGVR_UViG_3300031382_000029|3300031382|Ga0307971_1000467	IMG_VR v3	Metagenome	3300031382	Linear	21279	Clustered	IMG_VR_1427	NA	NA	NA	NA	NA	10.1093/nar/gkaa946 10.3389/fmicb.2021.674758	10.46936/10.25585/60001034
IMG_VR_1438	IMGVR_UViG_3300031391_000019|3300031391|Ga0307954_1000473	IMG_VR v3	Metagenome	3300031391	Linear	21927	Clustered	IMG_VR_1427	NA	NA	NA	NA	NA	10.1093/nar/gkaa946 10.3389/fmicb.2021.674758	10.46936/10.25585/60001034
IMG_VR_1439	IMGVR_UViG_3300031395_000016|3300031395|Ga0307957_1000534	IMG_VR v3	Metagenome	3300031395	Linear	21929	Clustered	IMG_VR_1427	NA	NA	NA	NA	NA	10.1093/nar/gkaa946 10.3389/fmicb.2021.674758	10.46936/10.25585/60001034
IMG_VR_1440	IMGVR_UViG_3300031397_000029|3300031397|Ga0307960_1001137	IMG_VR v3	Metagenome	3300031397	Linear	15175	Clustered	Organic_Lake_virophage	NA	NA	NA	NA	NA	10.1093/nar/gkaa946 10.3389/fmicb.2021.674758	10.46936/10.25585/60001034
IMG_VR_1441	IMGVR_UViG_3300031398_000020|3300031398|Ga0307979_1001654	IMG_VR v3	Metagenome	3300031398	Linear	15802	Clustered	Organic_Lake_virophage	NA	NA	NA	NA	NA	10.1093/nar/gkaa946 10.3389/fmicb.2021.674758	10.46936/10.25585/60001034
IMG_VR_1442	IMGVR_UViG_3300031399_000047|3300031399|Ga0307968_1004387	IMG_VR v3	Metagenome	3300031399	Linear	11489	Clustered	Organic_Lake_virophage	NA	NA	NA	NA	NA	10.1093/nar/gkaa946 10.3389/fmicb.2021.674758	10.46936/10.25585/60001034
IMG_VR_1443	IMGVR_UViG_3300031404_000098|3300031404|Ga0307945_1013061	IMG_VR v3	Metagenome	3300031404	Linear	5737	Seed	IMG_VR_1443	Partial	MCP Penton PRO	NA	NA	Maveriviricetes;Priklausovirales;Omnilimnoviroviridae	10.1093/nar/gkaa946 10.3389/fmicb.2021.674758	10.46936/10.25585/60001034
IMG_VR_1444	IMGVR_UViG_3300031524_000082|3300031524|Ga0302320_10007316	IMG_VR v3	Metagenome	3300031524	Linear	24311	Clustered	IMG_VR_1399	NA	NA	NA	NA	NA	10.1093/nar/gkaa946	10.46936/fics.proj.2017.49950/60006215
IMG_VR_1445	IMGVR_UViG_3300031524_000109|3300031524|Ga0302320_10010617	IMG_VR v3	Metagenome	3300031524	Linear	19603	Seed	IMG_VR_1445	Partial	ATPase MCP Penton PRO	NA	NA	Maveriviricetes;Unclassified	10.1093/nar/gkaa946	10.46936/fics.proj.2017.49950/60006215
IMG_VR_1446	IMGVR_UViG_3300031524_000116|3300031524|Ga0302320_10011537	IMG_VR v3	Metagenome	3300031524	Linear	18675	Seed	IMG_VR_1446	Partial	ATPase MCP Penton PRO	NA	NA	Maveriviricetes;Priklausovirales;Omnilimnoviroviridae	10.1093/nar/gkaa946	10.46936/fics.proj.2017.49950/60006215
IMG_VR_1447	IMGVR_UViG_3300031524_000120|3300031524|Ga0302320_10012310	IMG_VR v3	Metagenome	3300031524	Linear	17999	Clustered	IMG_VR_1395	NA	NA	NA	NA	NA	10.1093/nar/gkaa946	10.46936/fics.proj.2017.49950/60006215
IMG_VR_1448	IMGVR_UViG_3300031600_000037|3300031600|Ga0307930_1001072	IMG_VR v3	Metagenome	3300031600	Linear	21939	Clustered	IMG_VR_1427	NA	NA	NA	NA	NA	10.1093/nar/gkaa946 10.3389/fmicb.2021.674758	10.46936/10.25585/60001034
IMG_VR_1449	IMGVR_UViG_3300031600_000083|3300031600|Ga0307930_1003137	IMG_VR v3	Metagenome	3300031600	Linear	12272	Seed	IMG_VR_1449	Partial	ATPase MCP Penton PRO	NA	NA	Maveriviricetes;Priklausovirales;Omnilimnoviroviridae	10.1093/nar/gkaa946 10.3389/fmicb.2021.674758	10.46936/10.25585/60001034
IMG_VR_1450	IMGVR_UViG_3300031613_000028|3300031613|Ga0307978_1001042	IMG_VR v3	Metagenome	3300031613	Linear	21533	Clustered	IMG_VR_1427	NA	NA	NA	NA	NA	10.1093/nar/gkaa946 10.3389/fmicb.2021.674758	10.46936/10.25585/60001034
IMG_VR_1451	IMGVR_UViG_3300031613_000029|3300031613|Ga0307978_1001046	IMG_VR v3	Metagenome	3300031613	Linear	21494	Clustered	Organic_Lake_virophage	NA	NA	NA	NA	NA	10.1093/nar/gkaa946 10.3389/fmicb.2021.674758	10.46936/10.25585/60001034
IMG_VR_1454	IMGVR_UViG_3300031759_000211|3300031759|Ga0316219_1002254	IMG_VR v3	Metagenome	3300031759	Linear	18155	Seed	IMG_VR_1454	Partial	ATPase MCP Penton PRO	NA	NA	Maveriviricetes;Mividavirales;Sputniviroviridae	10.1038/s41396-020-00870-1 10.1093/nar/gkaa946	10.46936/10.25585/60000907
IMG_VR_1462	IMGVR_UViG_3300031788_000144|3300031788|Ga0302319_10009208	IMG_VR v3	Metagenome	3300031788	Linear	19041	Clustered	IMG_VR_1397	NA	NA	NA	NA	NA	10.1093/nar/gkaa946	10.46936/fics.proj.2017.49950/60006215
IMG_VR_1467	IMGVR_UViG_3300031884_000337|3300031884|Ga0316220_1004374	IMG_VR v3	Metagenome	3300031884	Linear	10899	Clustered	IMG_VR_1454	NA	NA	NA	NA	NA	10.1038/s41396-020-00870-1 10.1093/nar/gkaa946	10.46936/10.25585/60000907
IMG_VR_1475	IMGVR_UViG_3300031964_000068|3300031964|Ga0311373_10002874	IMG_VR v3	Metagenome	3300031964	Linear	30856	Clustered	IMG_VR_1413	NA	NA	NA	NA	NA	10.1093/nar/gkaa946	10.46936/fics.proj.2017.49950/60006215
IMG_VR_1477	IMGVR_UViG_3300032011_000137|3300032011|Ga0315316_10000639	IMG_VR v3	Metagenome	3300032011	Linear	23459	Clustered	IMG_VR_1485	NA	NA	NA	NA	NA	10.1093/nar/gkaa946	10.46936/10.25585/60000921
IMG_VR_1485	IMGVR_UViG_3300032073_000134|3300032073|Ga0315315_10000555	IMG_VR v3	Metagenome	3300032073	Linear	31829	Seed	IMG_VR_1485	Near-complete	ATPase MCP Penton PRO	Group 001	Aquatic virophages 1	Maveriviricetes;Priklausovirales;Omnilimnoviroviridae	10.1093/nar/gkaa946	10.46936/10.25585/60000921
IMG_VR_1490	IMGVR_UViG_3300032117_000284|3300032117|Ga0316218_1002986	IMG_VR v3	Metagenome	3300032117	Linear	14694	Clustered	IMG_VR_1508	NA	NA	NA	NA	NA	10.1038/s41396-020-00870-1 10.1093/nar/gkaa946	10.46936/10.25585/60000907
IMG_VR_1491	IMGVR_UViG_3300032117_000465|3300032117|Ga0316218_1005002	IMG_VR v3	Metagenome	3300032117	Linear	9736	Clustered	IMG_VR_1454	NA	NA	NA	NA	NA	10.1038/s41396-020-00870-1 10.1093/nar/gkaa946	10.46936/10.25585/60000907
IMG_VR_1492	IMGVR_UViG_3300032117_000634|3300032117|Ga0316218_1007861	IMG_VR v3	Metagenome	3300032117	Linear	6719	Seed	IMG_VR_1492	Partial	MCP Penton PRO	NA	NA	Maveriviricetes;Priklausovirales;Omnilimnoviroviridae	10.1038/s41396-020-00870-1 10.1093/nar/gkaa946	10.46936/10.25585/60000907
IMG_VR_1499	IMGVR_UViG_3300032277_000203|3300032277|Ga0316202_10001973	IMG_VR v3	Metagenome	3300032277	Linear	14342	Seed	IMG_VR_1499	Partial	ATPase MCP Penton PRO	NA	NA	Maveriviricetes;Unclassified	10.1093/nar/gkaa946	10.46936/10.25585/60001141
IMG_VR_1502	IMGVR_UViG_3300032560_000396|3300032560|Ga0316223_1004976	IMG_VR v3	Metagenome	3300032560	Linear	8945	Clustered	IMG_VR_1454	NA	NA	NA	NA	NA	10.1038/s41396-020-00870-1 10.1093/nar/gkaa946	10.46936/10.25585/60000907
IMG_VR_1503	IMGVR_UViG_3300032561_000433|3300032561|Ga0316222_1007377	IMG_VR v3	Metagenome	3300032561	Linear	8554	Clustered	IMG_VR_1454	NA	NA	NA	NA	NA	10.1038/s41396-020-00870-1 10.1093/nar/gkaa946	10.46936/10.25585/60000907
IMG_VR_1504	IMGVR_UViG_3300032562_000250|3300032562|Ga0316226_1002401	IMG_VR v3	Metagenome	3300032562	Linear	17705	Clustered	IMG_VR_1454	NA	NA	NA	NA	NA	10.1038/s41396-020-00870-1 10.1093/nar/gkaa946	10.46936/10.25585/60000907
IMG_VR_1505	IMGVR_UViG_3300032579_000196|3300032579|Ga0316228_1004599	IMG_VR v3	Metagenome	3300032579	Linear	10205	Clustered	IMG_VR_1454	NA	NA	NA	NA	NA	10.1038/s41396-020-00870-1 10.1093/nar/gkaa946	10.46936/10.25585/60000907
IMG_VR_1506	IMGVR_UViG_3300032605_000209|3300032605|Ga0316232_1002635	IMG_VR v3	Metagenome	3300032605	Linear	18098	Clustered	IMG_VR_1454	NA	NA	NA	NA	NA	10.1038/s41396-020-00870-1 10.1093/nar/gkaa946	10.46936/10.25585/60000907
IMG_VR_1507	IMGVR_UViG_3300032605_000300|3300032605|Ga0316232_1003758	IMG_VR v3	Metagenome	3300032605	Linear	13609	Clustered	IMG_VR_1508	NA	NA	NA	NA	NA	10.1038/s41396-020-00870-1 10.1093/nar/gkaa946	10.46936/10.25585/60000907
IMG_VR_1508	IMGVR_UViG_3300032665_000252|3300032665|Ga0316221_1001987	IMG_VR v3	Metagenome	3300032665	DTR	19227	Seed	IMG_VR_1508	Complete	ATPase MCP Penton PRO	Group 001	Aquatic virophages 1	Maveriviricetes;Priklausovirales;Omnilimnoviroviridae	10.1038/s41396-020-00870-1 10.1093/nar/gkaa946	10.46936/10.25585/60000907
IMG_VR_1509	IMGVR_UViG_3300032665_000280|3300032665|Ga0316221_1002169	IMG_VR v3	Metagenome	3300032665	Linear	18136	Clustered	IMG_VR_1454	NA	NA	NA	NA	NA	10.1038/s41396-020-00870-1 10.1093/nar/gkaa946	10.46936/10.25585/60000907
IMG_VR_1510	IMGVR_UViG_3300032668_000186|3300032668|Ga0316230_1002113	IMG_VR v3	Metagenome	3300032668	Linear	18089	Clustered	IMG_VR_1454	NA	NA	NA	NA	NA	10.1038/s41396-020-00870-1 10.1093/nar/gkaa946	10.46936/10.25585/60000907
IMG_VR_1511	IMGVR_UViG_3300032675_000176|3300032675|Ga0316225_1001758	IMG_VR v3	Metagenome	3300032675	Linear	19288	Clustered	IMG_VR_1508	NA	NA	NA	NA	NA	10.1038/s41396-020-00870-1 10.1093/nar/gkaa946	10.46936/10.25585/60000907
IMG_VR_1512	IMGVR_UViG_3300032675_000190|3300032675|Ga0316225_1001940	IMG_VR v3	Metagenome	3300032675	Linear	18073	Clustered	IMG_VR_1454	NA	NA	NA	NA	NA	10.1038/s41396-020-00870-1 10.1093/nar/gkaa946	10.46936/10.25585/60000907
IMG_VR_1513	IMGVR_UViG_3300032677_000232|3300032677|Ga0316227_1002188	IMG_VR v3	Metagenome	3300032677	Linear	18141	Clustered	IMG_VR_1454	NA	NA	NA	NA	NA	10.1038/s41396-020-00870-1 10.1093/nar/gkaa946	10.46936/10.25585/60000907
IMG_VR_1514	IMGVR_UViG_3300032722_000169|3300032722|Ga0316231_1002378	IMG_VR v3	Metagenome	3300032722	Linear	18144	Clustered	IMG_VR_1454	NA	NA	NA	NA	NA	10.1038/s41396-020-00870-1 10.1093/nar/gkaa946	10.46936/10.25585/60000907
IMG_VR_1515	IMGVR_UViG_3300032753_000348|3300032753|Ga0316224_1003475	IMG_VR v3	Metagenome	3300032753	Linear	12882	Clustered	IMG_VR_1454	NA	NA	NA	NA	NA	10.1038/s41396-020-00870-1 10.1093/nar/gkaa946	10.46936/10.25585/60000907
IMG_VR_1516	IMGVR_UViG_3300032770_000121|3300032770|Ga0335085_10008907	IMG_VR v3	Metagenome	3300032770	DTR	15087	Seed	IMG_VR_1516	Complete	ATPase MCP Penton PRO	Group 002	Sputnik virophages	Maveriviricetes;Mividavirales;Sputniviroviridae	10.1093/nar/gkaa946 10.1186/s40793-019-0352-4	10.46936/10.25585/60001011
IMG_VR_1517	IMGVR_UViG_3300032770_000126|3300032770|Ga0335085_10009290	IMG_VR v3	Metagenome	3300032770	Linear	14858	Seed	IMG_VR_1517	Partial	ATPase MCP Penton PRO	NA	NA	Maveriviricetes;Mividavirales;Sputniviroviridae	10.1093/nar/gkaa946 10.1186/s40793-019-0352-4	10.46936/10.25585/60001011
IMG_VR_1518	IMGVR_UViG_3300032770_000141|3300032770|Ga0335085_10012783	IMG_VR v3	Metagenome	3300032770	Linear	12344	Seed	IMG_VR_1518	Partial	ATPase MCP Penton PRO	NA	NA	Maveriviricetes;Mividavirales;Sputniviroviridae	10.1093/nar/gkaa946 10.1186/s40793-019-0352-4	10.46936/10.25585/60001011
IMG_VR_1519	IMGVR_UViG_3300032893_000323|3300032893|Ga0335069_10005211	IMG_VR v3	Metagenome	3300032893	DTR	19021	Seed	IMG_VR_1519	Complete	ATPase MCP Penton PRO	Group 002	Sputnik virophages	Maveriviricetes;Mividavirales;Sputniviroviridae	10.1093/nar/gkaa946 10.1186/s40793-019-0352-4	10.46936/10.25585/60001011
IMG_VR_1520	IMGVR_UViG_3300032893_000415|3300032893|Ga0335069_10010295	IMG_VR v3	Metagenome	3300032893	Linear	13255	Seed	IMG_VR_1520	Partial	ATPase MCP Penton PRO	NA	NA	Maveriviricetes;Mividavirales;Sputniviroviridae	10.1093/nar/gkaa946 10.1186/s40793-019-0352-4	10.46936/10.25585/60001011
IMG_VR_1521	IMGVR_UViG_3300032954_000098|3300032954|Ga0335083_10008039	IMG_VR v3	Metagenome	3300032954	Linear	12923	Clustered	IMG_VR_1517	NA	NA	NA	NA	NA	10.1093/nar/gkaa946 10.1186/s40793-019-0352-4	10.46936/10.25585/60001011
IMG_VR_1525	IMGVR_UViG_3300035663_000175|3300035663|Ga0335062_0002119	IMG_VR v3	Metagenome	3300035663	Linear	16526	Clustered	IMG_VR_1531	NA	NA	NA	NA	NA	10.1093/nar/gkaa946	10.46936/10.25585/60001198
IMG_VR_1526	IMGVR_UViG_3300035665_000201|3300035665|Ga0334984_0000932	IMG_VR v3	Metagenome	3300035665	Linear	27059	Seed	IMG_VR_1526	Near-complete	ATPase MCP Penton PRO	NA	NA	Maveriviricetes;Unclassified	10.1093/nar/gkaa946	10.46936/10.25585/60001198
IMG_VR_1527	IMGVR_UViG_3300035666_000151|3300035666|Ga0335009_0001450	IMG_VR v3	Metagenome	3300035666	Linear	24908	Seed	IMG_VR_1527	Near-complete	ATPase MCP Penton PRO	Group 001	Aquatic virophages 1	Maveriviricetes;Priklausovirales;Omnilimnoviroviridae	10.1093/nar/gkaa946	10.46936/10.25585/60001198
IMG_VR_1528	IMGVR_UViG_3300035670_000900|3300035670|Ga0310129_0001438	IMG_VR v3	Metagenome	3300035670	Linear	31405	Seed	IMG_VR_1528	Near-complete	ATPase MCP Penton PRO	Group 004	SW01 virophages	Maveriviricetes;Priklausovirales;Dishuiviroviridae	10.1093/nar/gkaa946 10.1186/s40168-021-01194-8	10.46936/10.25585/60001053
IMG_VR_1529	IMGVR_UViG_3300035670_001491|3300035670|Ga0310129_0002573	IMG_VR v3	Metagenome	3300035670	Linear	20149	Seed	IMG_VR_1529	Partial	ATPase MCP Penton PRO	NA	NA	Maveriviricetes;Priklausovirales;Omnilimnoviroviridae	10.1093/nar/gkaa946 10.1186/s40168-021-01194-8	10.46936/10.25585/60001053
IMG_VR_1530	IMGVR_UViG_3300035670_001933|3300035670|Ga0310129_0003606	IMG_VR v3	Metagenome	3300035670	Linear	15867	Seed	IMG_VR_1530	Partial	ATPase MCP PRO	NA	NA	Maveriviricetes;Unclassified	10.1093/nar/gkaa946 10.1186/s40168-021-01194-8	10.46936/10.25585/60001053
IMG_VR_1531	IMGVR_UViG_3300035681_000107|3300035681|Ga0335034_0000859	IMG_VR v3	Metagenome	3300035681	Linear	27320	Seed	IMG_VR_1531	Near-complete	ATPase MCP Penton PRO	Group 002	Sputnik virophages	Maveriviricetes;Mividavirales;Sputniviroviridae	10.1093/nar/gkaa946	10.46936/10.25585/60001198
IMG_VR_1532	IMGVR_UViG_3300035682_000180|3300035682|Ga0335046_0000887	IMG_VR v3	Metagenome	3300035682	Linear	25075	Seed	IMG_VR_1532	Near-complete	ATPase MCP Penton PRO	Group 001	Aquatic virophages 1	Maveriviricetes;Priklausovirales;Omnilimnoviroviridae	10.1093/nar/gkaa946	10.46936/10.25585/60001198
IMG_VR_1534	IMGVR_UViG_3300035696_000336|3300035696|Ga0374055_0049619	IMG_VR v3	Metagenome	3300035696	DTR	14076	Seed	IMG_VR_1534	Complete	ATPase MCP Penton PRO	Group 002	Sputnik virophages	Maveriviricetes;Mividavirales;Sputniviroviridae	10.1038/s41396-020-00782-0 10.1093/nar/gkaa946	10.46936/10.25585/60000911
IMG_VR_1535	IMGVR_UViG_3300035696_000377|3300035696|Ga0374055_0063816	IMG_VR v3	Metagenome	3300035696	Linear	11591	Seed	IMG_VR_1535	Partial	ATPase MCP Penton PRO	NA	NA	Maveriviricetes;Mividavirales;Sputniviroviridae	10.1038/s41396-020-00782-0 10.1093/nar/gkaa946	10.46936/10.25585/60000911
IMG_VR_1538	Station168_DCM_ALL_assembly_NODE_2861_length_29375_cov_6.447476	IMG_VR v3	Metagenome	Station168_DCM	Linear	29375	Seed	IMG_VR_1538	Near-complete	ATPase MCP Penton PRO	Group 001	Aquatic virophages 1	Maveriviricetes;Priklausovirales;Omnilimnoviroviridae	10.1038/nature19366 10.1093/nar/gkaa946
IMG_VR_1539	Station175_SUR_ALL_assembly_NODE_3588_length_25042_cov_4.478649	IMG_VR v3	Metagenome	Station175_SUR	Linear	25042	Seed	IMG_VR_1539	Near-complete	ATPase MCP Penton PRO	Group 001	Aquatic virophages 1	Maveriviricetes;Priklausovirales;Omnilimnoviroviridae	10.1038/nature19366 10.1093/nar/gkaa946
IMG_VR_1540	Station180_SUR_ALL_assembly_NODE_2845_length_33924_cov_7.778883	IMG_VR v3	Metagenome	Station180_SUR	Linear	33924	Seed	IMG_VR_1540	Near-complete	ATPase MCP Penton PRO	Group 005	Large virophages	Maveriviricetes;Priklausovirales;Gulliviroviridae	10.1038/nature19366 10.1093/nar/gkaa946
IMG_VR_1541	Station180_SUR_ALL_assembly_NODE_3079_length_31961_cov_5.699868	IMG_VR v3	Metagenome	Station180_SUR	Linear	31961	Seed	IMG_VR_1541	Near-complete	ATPase MCP Penton PRO	Group 005	Large virophages	Maveriviricetes;Priklausovirales;Gulliviroviridae	10.1038/nature19366 10.1093/nar/gkaa946
IMG_VR_1542	Station180_SUR_ALL_assembly_NODE_3641_length_28217_cov_4.843832	IMG_VR v3	Metagenome	Station180_SUR	DTR	28162	Seed	IMG_VR_1542	Complete	ATPase MCP Penton PRO	Group 003	Aquatic virophages 2	Maveriviricetes;Priklausovirales;Burtonviroviridae	10.1038/nature19366 10.1093/nar/gkaa946
IMG_VR_1543	Station180_SUR_ALL_assembly_NODE_3882_length_26868_cov_6.178048	IMG_VR v3	Metagenome	Station180_SUR	Linear	26868	Seed	IMG_VR_1543	Near-complete	ATPase MCP Penton PRO	Group 001	Aquatic virophages 1	Maveriviricetes;Priklausovirales;Omnilimnoviroviridae	10.1038/nature19366 10.1093/nar/gkaa946
IMG_VR_1544	Station180_SUR_ALL_assembly_NODE_4122_length_25534_cov_12.416029	IMG_VR v3	Metagenome	Station180_SUR	Linear	25534	Seed	IMG_VR_1544	Near-complete	ATPase MCP Penton PRO	Group 003	Aquatic virophages 2	Maveriviricetes;Priklausovirales;Burtonviroviridae	10.1038/nature19366 10.1093/nar/gkaa946
IMG_VR_1545	Station180_SUR_ALL_assembly_NODE_4934_length_22212_cov_15.119872	IMG_VR v3	Metagenome	Station180_SUR	Linear	22212	Seed	IMG_VR_1545	Partial	ATPase MCP Penton PRO	NA	NA	Maveriviricetes;Priklausovirales;Dishuiviroviridae	10.1038/nature19366 10.1093/nar/gkaa946
IMG_VR_1546	Station180_SUR_ALL_assembly_NODE_5143_length_21615_cov_21.075557	IMG_VR v3	Metagenome	Station180_SUR	Linear	21615	Seed	IMG_VR_1546	Partial	ATPase MCP Penton	NA	NA	Maveriviricetes;Priklausovirales;Dishuiviroviridae	10.1038/nature19366 10.1093/nar/gkaa946
IMG_VR_1547	Station180_SUR_ALL_assembly_NODE_5218_length_21364_cov_2.370031	IMG_VR v3	Metagenome	Station180_SUR	Linear	21364	Seed	IMG_VR_1547	Partial	ATPase MCP Penton PRO	NA	NA	Maveriviricetes;Unclassified	10.1038/nature19366 10.1093/nar/gkaa946
IMG_VR_1548	Station180_SUR_ALL_assembly_NODE_5478_length_20539_cov_7.741408	IMG_VR v3	Metagenome	Station180_SUR	DTR	20484	Seed	IMG_VR_1548	Complete	ATPase MCP Penton PRO	Group 003	Aquatic virophages 2	Maveriviricetes;Priklausovirales;Burtonviroviridae	10.1038/nature19366 10.1093/nar/gkaa946
IMG_VR_1549	Station180_SUR_ALL_assembly_NODE_5480_length_20528_cov_2.798662	IMG_VR v3	Metagenome	Station180_SUR	Linear	20528	Seed	IMG_VR_1549	Partial	ATPase MCP Penton PRO	NA	NA	Maveriviricetes;Priklausovirales;Dishuiviroviridae	10.1038/nature19366 10.1093/nar/gkaa946
IMG_VR_1550	Station180_SUR_ALL_assembly_NODE_6445_length_18163_cov_4.079799	IMG_VR v3	Metagenome	Station180_SUR	Linear	18163	Seed	IMG_VR_1550	Partial	ATPase MCP Penton PRO	NA	NA	Maveriviricetes;Priklausovirales;Burtonviroviridae	10.1038/nature19366 10.1093/nar/gkaa946
IMG_VR_1551	Station180_SUR_ALL_assembly_NODE_7038_length_16953_cov_40.558705	IMG_VR v3	Metagenome	Station180_SUR	Linear	16953	Seed	IMG_VR_1551	Partial	ATPase MCP Penton PRO	NA	NA	Maveriviricetes;Mividavirales;Sputniviroviridae	10.1038/nature19366 10.1093/nar/gkaa946
IMG_VR_1552	Station180_ZZZ_ALL_assembly_NODE_1815_length_31736_cov_4.809286	IMG_VR v3	Metagenome	Station180_ZZZ	Linear	31736	Seed	IMG_VR_1552	Near-complete	ATPase MCP Penton PRO	Group 004	SW01 virophages	Maveriviricetes;Priklausovirales;Dishuiviroviridae	10.1038/nature19366 10.1093/nar/gkaa946
IMG_VR_1553	Station180_ZZZ_ALL_assembly_NODE_3743_length_18705_cov_8.442842	IMG_VR v3	Metagenome	Station180_ZZZ	Linear	18705	Seed	IMG_VR_1553	Partial	ATPase MCP Penton	NA	NA	Maveriviricetes;Priklausovirales;Omnilimnoviroviridae	10.1038/nature19366 10.1093/nar/gkaa946
IMG_VR_1554	Station189_MES_ALL_assembly_NODE_2482_length_26697_cov_7.184371	IMG_VR v3	Metagenome	Station189_MES	DTR	26686	Seed	IMG_VR_1554	Complete	ATPase MCP Penton PRO	Group 003	Aquatic virophages 2	Maveriviricetes;Priklausovirales;Burtonviroviridae	10.1038/nature19366 10.1093/nar/gkaa946
IMG_VR_1555	Station189_MES_ALL_assembly_NODE_3971_length_20025_cov_3.202904	IMG_VR v3	Metagenome	Station189_MES	Linear	20025	Seed	IMG_VR_1555	Partial	ATPase MCP Penton PRO	NA	NA	Maveriviricetes;Priklausovirales;Omnilimnoviroviridae	10.1038/nature19366 10.1093/nar/gkaa946
IMG_VR_1556	Station191_SUR_ALL_assembly_NODE_2466_length_15185_cov_12.036550	IMG_VR v3	Metagenome	Station191_SUR	Linear	15185	Seed	IMG_VR_1556	Partial	MCP Penton PRO	NA	NA	Maveriviricetes;Priklausovirales;Omnilimnoviroviridae	10.1038/nature19366 10.1093/nar/gkaa946
IMG_VR_1557	Station193_SUR_ALL_assembly_NODE_3099_length_15845_cov_12.571818	IMG_VR v3	Metagenome	Station193_SUR	Linear	15845	Seed	IMG_VR_1557	Partial	MCP Penton PRO	NA	NA	Maveriviricetes;Priklausovirales;Omnilimnoviroviridae	10.1038/nature19366 10.1093/nar/gkaa946
IMG_VR_1558	Station194_SUR_ALL_assembly_NODE_1229_length_26942_cov_6.166214	IMG_VR v3	Metagenome	Station194_SUR	DTR	26887	Seed	IMG_VR_1558	Complete	ATPase MCP Penton PRO	Group 001	Aquatic virophages 1	Maveriviricetes;Priklausovirales;Omnilimnoviroviridae	10.1038/nature19366 10.1093/nar/gkaa946
IMG_VR_1559	Station194_SUR_ALL_assembly_NODE_1887_length_20343_cov_22.084138	IMG_VR v3	Metagenome	Station194_SUR	Linear	20343	Seed	IMG_VR_1559	Partial	ATPase MCP Penton	NA	NA	Maveriviricetes;Priklausovirales;Omnilimnoviroviridae	10.1038/nature19366 10.1093/nar/gkaa946
IMG_VR_1560	Station194_SUR_ALL_assembly_NODE_1909_length_20139_cov_9.509908	IMG_VR v3	Metagenome	Station194_SUR	Linear	20139	Seed	IMG_VR_1560	Partial	ATPase MCP Penton PRO	NA	NA	Maveriviricetes;Priklausovirales;Omnilimnoviroviridae	10.1038/nature19366 10.1093/nar/gkaa946
IMG_VR_1561	Station196_SUR_ALL_assembly_NODE_1589_length_25438_cov_20.946224	IMG_VR v3	Metagenome	Station196_SUR	Linear	25438	Seed	IMG_VR_1561	Near-complete	ATPase MCP Penton PRO	Group 001	Aquatic virophages 1	Maveriviricetes;Priklausovirales;Omnilimnoviroviridae	10.1038/nature19366 10.1093/nar/gkaa946
IMG_VR_1562	Station201_DCM_ALL_assembly_NODE_4065_length_16423_cov_6.206623	IMG_VR v3	Metagenome	Station201_DCM	Linear	16423	Clustered	IMG_VR_1566	NA	NA	NA	NA	NA	10.1038/nature19366 10.1093/nar/gkaa946
IMG_VR_1563	Station205_MES_ALL_assembly_NODE_4758_length_13547_cov_6.488660	IMG_VR v3	Metagenome	Station205_MES	Linear	13547	Seed	IMG_VR_1563	Partial	ATPase MCP Penton	NA	NA	Maveriviricetes;Priklausovirales;Omnilimnoviroviridae	10.1038/nature19366 10.1093/nar/gkaa946
IMG_VR_1564	Station205_SUR_ALL_assembly_NODE_3146_length_14445_cov_9.488603	IMG_VR v3	Metagenome	Station205_SUR	Linear	14445	Clustered	IMG_VR_1566	NA	NA	NA	NA	NA	10.1038/nature19366 10.1093/nar/gkaa946
IMG_VR_1565	Station206_MES_ALL_assembly_NODE_2295_length_31483_cov_7.828306	IMG_VR v3	Metagenome	Station206_MES	Linear	31483	Seed	IMG_VR_1565	Near-complete	ATPase MCP Penton PRO	Group 001	Aquatic virophages 1	Maveriviricetes;Priklausovirales;Omnilimnoviroviridae	10.1038/nature19366 10.1093/nar/gkaa946
IMG_VR_1566	Station206_SUR_ALL_assembly_NODE_3734_length_16479_cov_18.179250	IMG_VR v3	Metagenome	Station206_SUR	Linear	16479	Seed	IMG_VR_1566	Partial	ATPase MCP Penton PRO	NA	NA	Maveriviricetes;Priklausovirales;Omnilimnoviroviridae	10.1038/nature19366 10.1093/nar/gkaa946
IMG_VR_1567	Station209_MES_ALL_assembly_NODE_2922_length_28332_cov_5.658380	IMG_VR v3	Metagenome	Station209_MES	Linear	28332	Seed	IMG_VR_1567	Near-complete	ATPase MCP Penton PRO	Group 001	Aquatic virophages 1	Maveriviricetes;Priklausovirales;Omnilimnoviroviridae	10.1038/nature19366 10.1093/nar/gkaa946
IMG_VR_1568	Station67_SUR_ALL_assembly_NODE_1816_length_15341_cov_3.204959	IMG_VR v3	Metagenome	Station67_SUR	Linear	15341	Seed	IMG_VR_1568	Partial	ATPase MCP Penton PRO	NA	NA	Maveriviricetes;Mividavirales;Sputniviroviridae	10.1038/nature19366 10.1093/nar/gkaa946
IMG_VR_1569	Station67_SUR_ALL_assembly_NODE_696_length_28082_cov_5.771078	IMG_VR v3	Metagenome	Station67_SUR	Linear	28082	Seed	IMG_VR_1569	Near-complete	ATPase MCP Penton PRO	Group 001	Aquatic virophages 1	Maveriviricetes;Priklausovirales;Omnilimnoviroviridae	10.1038/nature19366 10.1093/nar/gkaa946
Drosophila-associated_adintovirus_3_isolate_AV-3/DK/Kar/16/4/Pool	MT496849.1	NCBI databases – Sequence-based search (Sept 2021)	Metagenome	NCBI databases (Oct 2021)	Linear	13883	Seed	Drosophila-associated_adintovirus_3_isolate_AV-3/DK/Kar/16/4/Pool	Partial	ATPase MCP Penton PRO	NA	NA	Maveriviricetes;Unclassified	10.1093/ve/veab031
MAG_Alphaproteobacteria_bacterium_isolate_WB8_3_131_contig_100_65	RGPV01000066.1	NCBI databases – Sequence-based search (Sept 2021)	Metagenome	NCBI databases (Oct 2021)	Linear	5180	Clustered	IMG_VR_1039	NA	NA	NA	NA	NA	10.1111/1462-2920.15112
MAG_bacterium_isolate_WB4_3_0875_contig_100_19	RFTN01000020.1	NCBI databases – Sequence-based search (Sept 2021)	Metagenome	NCBI databases (Oct 2021)	Linear	20951	Seed	MAG_bacterium_isolate_WB4_3_0875_contig_100_19	Partial	MCP Penton PRO	NA	NA	Maveriviricetes;Priklausovirales;Burtonviroviridae	10.1111/1462-2920.15112
MAG_bacterium_isolate_WB4_3_0878_contig_100_31	RFQR01000032.1	NCBI databases – Sequence-based search (Sept 2021)	Metagenome	NCBI databases (Oct 2021)	Linear	10551	Seed	MAG_bacterium_isolate_WB4_3_0878_contig_100_31	Partial	MCP Penton PRO	NA	NA	Maveriviricetes;Priklausovirales;Burtonviroviridae	10.1111/1462-2920.15112
MAG_Bacteroidetes_bacterium_isolate_SZAS-20_CK_MAG-73__86__length-17226	JAFDXH010000086.1	NCBI databases – Sequence-based search (Sept 2021)	Metagenome	NCBI databases (Oct 2021)	Linear	17226	Seed	MAG_Bacteroidetes_bacterium_isolate_SZAS-20_CK_MAG-73__86__length-17226	Partial	ATPase MCP Penton PRO	NA	NA	Maveriviricetes;Unclassified	10.1016/j.watres.2021.117087
MAG_Methanobrevibacter_sp._isolate_RGIG9618_Yak_Duodenum-3__c32379	JAGCAQ010000056.1	NCBI databases – Sequence-based search (Sept 2021)	Metagenome	NCBI databases (Oct 2021)	Linear	29862	Seed	MAG_Methanobrevibacter_sp._isolate_RGIG9618_Yak_Duodenum-3__c32379	Near-complete	ATPase MCP PRO	Group 007	Rumen virophages	Maveriviricetes;Divpevirales;Ruviroviridae
MAG_Methanobrevibacter_sp._isolate_RGIG9905_Yak_Rectum-5__c5223	JAGCLR010000004.1	NCBI databases – Sequence-based search (Sept 2021)	Metagenome	NCBI databases (Oct 2021)	Linear	12509	Seed	MAG_Methanobrevibacter_sp._isolate_RGIG9905_Yak_Rectum-5__c5223	Partial	ATPase MCP PRO	NA	NA	Maveriviricetes;Divpevirales;Ruviroviridae
MAG_Moraxellaceae_bacterium_isolate_AER3_12_diesel_EC_AER3_1478_length_9131_cov_6	JAECRV010000113.1	NCBI databases – Sequence-based search (Sept 2021)	Metagenome	NCBI databases (Oct 2021)	Linear	8647	Clustered	IMG_VR_0448	NA	NA	NA	NA	NA	10.3389/fmicb.2020.587782
MAG_Nitrosarchaeum_sp._isolate_CROMO_BS_83_3_0_c_000000707256	JAGXTE010000039.1	NCBI databases – Sequence-based search (Sept 2021)	Metagenome	NCBI databases (Oct 2021)	Linear	16191	Seed	MAG_Nitrosarchaeum_sp._isolate_CROMO_BS_83_3_0_c_000000707256	Partial	ATPase MCP Penton PRO	NA	NA	Maveriviricetes;Unclassified	10.1029/2020JG006209
MAG_Paludibacteraceae_bacterium_isolate_RGIG10203_Yak_Rumen-5__c493196	JAGCXD010000070.1	NCBI databases – Sequence-based search (Sept 2021)	Metagenome	NCBI databases (Oct 2021)	Linear	13840	Seed	MAG_Paludibacteraceae_bacterium_isolate_RGIG10203_Yak_Rumen-5__c493196	Partial	ATPase MCP PRO	NA	NA	Maveriviricetes;Divpevirales;Ruviroviridae
MAG_Paludibacteraceae_bacterium_isolate_RGIG8219_Water_buffalos_Rumen-5__c1242693	JAFZYS010000085.1	NCBI databases – Sequence-based search (Sept 2021)	Metagenome	NCBI databases (Oct 2021)	Linear	11190	Seed	MAG_Paludibacteraceae_bacterium_isolate_RGIG8219_Water_buffalos_Rumen-5__c1242693	Partial	ATPase MCP Penton PRO	NA	NA	Maveriviricetes;Divpevirales;Ruviroviridae
MAG_Proteobacteria_bacterium_isolate_WB6_1B_172_contig_100_157	RGDD01000158.1	NCBI databases – Sequence-based search (Sept 2021)	Metagenome	NCBI databases (Oct 2021)	Linear	8302	Seed	MAG_Proteobacteria_bacterium_isolate_WB6_1B_172_contig_100_157	Partial	ATPase MCP Penton	NA	NA	Maveriviricetes;Priklausovirales;Omnilimnoviroviridae	10.1111/1462-2920.15112
MAG_TPA_asm_archaeon_isolate_HyVt-334_HyVt-334_k145_105466	DRFZ01000015.1	NCBI databases – Sequence-based search (Sept 2021)	Metagenome	NCBI databases (Oct 2021)	Linear	14395	Clustered	IMG_VR_0215	NA	NA	NA	NA	NA	10.1128/mSystems.00795-19
Marine_sediment_metagenome_LCGC14_contig001521	LAZR01001521.1	NCBI databases – Sequence-based search (Sept 2021)	Metagenome	NCBI databases (Oct 2021)	Linear	14620	Clustered	IMG_VR_0215	NA	NA	NA	NA	NA	10.1038/nature14447
TPA_asm_Adintovirus_sp._isolate_ctC5m11	BK059143.1	NCBI databases – Sequence-based search (Sept 2021)	Metagenome	NCBI databases (Oct 2021)	Linear	16748	Clustered	PE_329	NA	NA	NA	NA	NA	10.1073/pnas.2023202118
TPA_asm_Adintovirus_sp._isolate_cth614	BK057806.1	NCBI databases – Sequence-based search (Sept 2021)	Metagenome	NCBI databases (Oct 2021)	Linear	17125	Seed	TPA_asm_Adintovirus_sp._isolate_cth614	Partial	ATPase MCP PRO	NA	NA	Maveriviricetes;Divpevirales;Ruviroviridae	10.1073/pnas.2023202118
TPA_asm_Bovine_rumen_MELD_virus_isolate_4424	BK012045.1	NCBI databases – Sequence-based search (Sept 2021)	Metagenome	NCBI databases (Oct 2021)	Linear	11440	Clustered	PE_001	NA	NA	NA	NA	NA	10.1101/697771
TPA_asm_Sheep_rumen_MELD_virus_isolate_2431	BK012061.1	NCBI databases – Sequence-based search (Sept 2021)	Metagenome	NCBI databases (Oct 2021)	Linear	14207	Seed	TPA_asm_Sheep_rumen_MELD_virus_isolate_2431	Partial	ATPase MCP Penton PRO	NA	NA	Maveriviricetes;Divpevirales;Ruviroviridae	10.1101/697771
VLTL01000025|176266-191954	VLTL01000025|176266-191954	NCBI databases – Sequence-based search (Sept 2021)	Protist genome	VLTL01000025	Integrated	15689	Clustered	VLTN01000088|1-20350	NA	NA	NA	NA	NA	10.1038/s41597-020-0363-4
VLTL01000095|81102-97723	VLTL01000095|81102-97723	NCBI databases – Sequence-based search (Sept 2021)	Protist genome	VLTL01000095	Integrated	16622	Clustered	EMALE06_BVI_058	NA	NA	NA	NA	NA	10.1038/s41597-020-0363-4
VLTL01000187|39495-48755	VLTL01000187|39495-48755	NCBI databases – Sequence-based search (Sept 2021)	Protist genome	VLTL01000187	Integrated	9261	Clustered	EMALE01_Cflag_017B	NA	NA	NA	NA	NA	10.1038/s41597-020-0363-4
VLTM01000009|537300-567050	VLTM01000009|537300-567050	NCBI databases – Sequence-based search (Sept 2021)	Protist genome	VLTM01000009	Integrated	29751	Seed	VLTM01000009|537300-567050	Near-complete	ATPase MCP Penton PRO	Group 006	Mavirus virophages	Maveriviricetes;Lavidavirales;Maviroviridae	10.1038/s41597-020-0363-4
VLTM01000015|1150-21300	VLTM01000015|1150-21300	NCBI databases – Sequence-based search (Sept 2021)	Protist genome	VLTM01000015	Integrated	20151	Clustered	EMALE06_BVI_058	NA	NA	NA	NA	NA	10.1038/s41597-020-0363-4
VLTM01000150|35150-60200	VLTM01000150|35150-60200	NCBI databases – Sequence-based search (Sept 2021)	Protist genome	VLTM01000150	Integrated	25051	Seed	VLTM01000150|35150-60200	Near-complete	ATPase MCP Penton PRO	Group 006	Mavirus virophages	Maveriviricetes;Lavidavirales;Maviroviridae	10.1038/s41597-020-0363-4
VLTM01000170|300-11650	VLTM01000170|300-11650	NCBI databases – Sequence-based search (Sept 2021)	Protist genome	VLTM01000170	Integrated	11351	Clustered	EMALE05_BVI_001A	NA	NA	NA	NA	NA	10.1038/s41597-020-0363-4
VLTM01000195|1-25850	VLTM01000195|1-25850	NCBI databases – Sequence-based search (Sept 2021)	Protist genome	VLTM01000195	Integrated	25850	Seed	VLTM01000195|1-25850	Near-complete	ATPase MCP Penton PRO	NA	NA	Maveriviricetes;Lavidavirales;Maviroviridae	10.1038/s41597-020-0363-4
VLTM01000197|2216-12150	VLTM01000197|2216-12150	NCBI databases – Sequence-based search (Sept 2021)	Protist genome	VLTM01000197	Integrated	9935	Clustered	VLTM01000195|1-25850	NA	NA	NA	NA	NA	10.1038/s41597-020-0363-4
VLTM01000199|1-18800	VLTM01000199|1-18800	NCBI databases – Sequence-based search (Sept 2021)	Protist genome	VLTM01000199	Integrated	18800	Clustered	EMALE05_BVI_001A	NA	NA	NA	NA	NA	10.1038/s41597-020-0363-4
VLTN01000001|1521650-1532850	VLTN01000001|1521650-1532850	NCBI databases – Sequence-based search (Sept 2021)	Protist genome	VLTN01000001	Integrated	11201	Clustered	VLTN01000088|1-20350	NA	NA	NA	NA	NA	10.1038/s41597-020-0363-4
VLTN01000001|229850-248750	VLTN01000001|229850-248750	NCBI databases – Sequence-based search (Sept 2021)	Protist genome	VLTN01000001	Integrated	18827	Clustered	EMALE05_BVI_001A	NA	NA	NA	NA	NA	10.1038/s41597-020-0363-4
VLTN01000008|142450-169200	VLTN01000008|142450-169200	NCBI databases – Sequence-based search (Sept 2021)	Protist genome	VLTN01000008	Integrated	26751	Seed	VLTN01000008|142450-169200	Near-complete	ATPase MCP Penton PRO	Group 006	Mavirus virophages	Maveriviricetes;Lavidavirales;Maviroviridae	10.1038/s41597-020-0363-4
VLTN01000008|740950-749750	VLTN01000008|740950-749750	NCBI databases – Sequence-based search (Sept 2021)	Protist genome	VLTN01000008	Integrated	8801	Clustered	VLTN01000088|1-20350	NA	NA	NA	NA	NA	10.1038/s41597-020-0363-4
VLTN01000029|7100-32850	VLTN01000029|7100-32850	NCBI databases – Sequence-based search (Sept 2021)	Protist genome	VLTN01000029	Integrated	25691	Clustered	EMALE06_BVI_058	NA	NA	NA	NA	NA	10.1038/s41597-020-0363-4
VLTN01000058|11550-30450	VLTN01000058|11550-30450	NCBI databases – Sequence-based search (Sept 2021)	Protist genome	VLTN01000058	Integrated	18901	Clustered	EMALE06_BVI_058	NA	NA	NA	NA	NA	10.1038/s41597-020-0363-4
VLTN01000088|1-20350	VLTN01000088|1-20350	NCBI databases – Sequence-based search (Sept 2021)	Protist genome	VLTN01000088	Integrated	20350	Seed	VLTN01000088|1-20350	Partial	ATPase MCP Penton PRO	NA	NA	Maveriviricetes;Lavidavirales;Maviroviridae	10.1038/s41597-020-0363-4
VLTN01000099|52100-62550	VLTN01000099|52100-62550	NCBI databases – Sequence-based search (Sept 2021)	Protist genome	VLTN01000099	Integrated	10451	Clustered	VLTN01000088|1-20350	NA	NA	NA	NA	NA	10.1038/s41597-020-0363-4
VLTN01000111|1-14050	VLTN01000111|1-14050	NCBI databases – Sequence-based search (Sept 2021)	Protist genome	VLTN01000111	Integrated	14050	Clustered	VLTM01000009|537300-567050	NA	NA	NA	NA	NA	10.1038/s41597-020-0363-4
VLTN01000115|1-30300	VLTN01000115|1-30300	NCBI databases – Sequence-based search (Sept 2021)	Protist genome	VLTN01000115	Integrated	30300	Clustered	EMALE01_Cflag_017B	NA	NA	NA	NA	NA	10.1038/s41597-020-0363-4
VLTN01000149|1-9750	VLTN01000149|1-9750	NCBI databases – Sequence-based search (Sept 2021)	Protist genome	VLTN01000149	Integrated	9750	Clustered	VLTM01000150|35150-60200	NA	NA	NA	NA	NA	10.1038/s41597-020-0363-4
VLTO01000001|120850-148450	VLTO01000001|120850-148450	NCBI databases – Sequence-based search (Sept 2021)	Protist genome	VLTO01000001	Integrated	27601	Clustered	EMALE07_E4-10_001	NA	NA	NA	NA	NA	10.1038/s41597-020-0363-4
VLTO01000023|380450-400050	VLTO01000023|380450-400050	NCBI databases – Sequence-based search (Sept 2021)	Protist genome	VLTO01000023	Integrated	19518	Seed	VLTO01000023|380450-400050	Complete	ATPase MCP Penton PRO	Group 006	Mavirus virophages	Maveriviricetes;Lavidavirales;Maviroviridae	10.1038/s41597-020-0363-4
VLTO01000053|155850-175700	VLTO01000053|155850-175700	NCBI databases – Sequence-based search (Sept 2021)	Protist genome	VLTO01000053	Integrated	19851	Clustered	EMALE05_BVI_001A	NA	NA	NA	NA	NA	10.1038/s41597-020-0363-4
VLTO01000130|600-20600	VLTO01000130|600-20600	NCBI databases – Sequence-based search (Sept 2021)	Protist genome	VLTO01000130	Integrated	20001	Seed	VLTO01000130|600-20600	Partial	ATPase MCP Penton PRO	NA	NA	Maveriviricetes;Lavidavirales;Maviroviridae	10.1038/s41597-020-0363-4
VLTO01000132|10000-30000	VLTO01000132|10000-30000	NCBI databases – Sequence-based search (Sept 2021)	Protist genome	VLTO01000132	Integrated	20001	Clustered	EMALE05_BVI_001A	NA	NA	NA	NA	NA	10.1038/s41597-020-0363-4
VLTO01000172|5150-16250	VLTO01000172|5150-16250	NCBI databases – Sequence-based search (Sept 2021)	Protist genome	VLTO01000172	Integrated	11101	Clustered	EMALE05_BVI_001A	NA	NA	NA	NA	NA	10.1038/s41597-020-0363-4
VLTO01000176|4950-14900	VLTO01000176|4950-14900	NCBI databases – Sequence-based search (Sept 2021)	Protist genome	VLTO01000176	Integrated	9951	Clustered	EMALE05_BVI_001A	NA	NA	NA	NA	NA	10.1038/s41597-020-0363-4
Ace_Lake_Mavirus	KC556923.1	NCBI Nucleotide database (Lavidaviridae – 2014)	Metagenome	NCBI databases (Oct 2021)	Linear	17767	Seed	Ace_Lake_Mavirus	Partial	ATPase MCP Penton PRO	NA	NA	Maveriviricetes;Lavidavirales;Maviroviridae	10.1128/JVI.03398-12
Yellowstone_Lake_virophage_1	KC556924.1	NCBI Nucleotide database (Lavidaviridae – 2014)	Metagenome	NCBI databases (Oct 2021)	Linear	27851	Seed	Yellowstone_Lake_virophage_1	Near-complete	ATPase MCP Penton PRO	Group 001	Aquatic virophages 1	Maveriviricetes;Priklausovirales;Omnilimnoviroviridae	10.1128/JVI.03398-12
Yellowstone_Lake_virophage_2	KC556925.1	NCBI Nucleotide database (Lavidaviridae – 2014)	Metagenome	NCBI databases (Oct 2021)	DTR	23184	Seed	Yellowstone_Lake_virophage_2	Complete	ATPase MCP Penton PRO	Group 004	NA	Maveriviricetes;Unclassified	10.1128/JVI.03398-12
Yellowstone_Lake_virophage_3	KC556926.1	NCBI Nucleotide database (Lavidaviridae – 2014)	Metagenome	NCBI databases (Oct 2021)	Linear	27050	Seed	Yellowstone_Lake_virophage_3	Near-complete	ATPase MCP Penton PRO	Group 004	SW01 virophages	Maveriviricetes;Priklausovirales;Dishuiviroviridae	10.1128/JVI.03398-12
Yellowstone_Lake_virophage_4	KC556922.1	NCBI Nucleotide database (Lavidaviridae – 2014)	Metagenome	NCBI databases (Oct 2021)	Linear	28306	Seed	Yellowstone_Lake_virophage_4	Near-complete	ATPase MCP Penton PRO	Group 001	Aquatic virophages 1	Maveriviricetes;Priklausovirales;Omnilimnoviroviridae	10.1128/JVI.03398-12
Cafeteriavirus-dependent_mavirus	KU052222.1	NCBI Nucleotide database (Lavidaviridae)	Isolate	NCBI databases (Oct 2021)	Linear	40196	Clustered	Maverick-related_virus_strain_Spezl	NA	NA	NA	NA	NA	10.1038/nature20593
Chlorella_virophage_isolate_SW01_OL828819	OL828819.1	NCBI Nucleotide database (Lavidaviridae)	Isolate	NCBI databases (Oct 2021)	Isolate	24744	Seed	Chlorella_virophage_isolate_SW01_OL828819	Complete	ATPase MCP Penton PRO	Group 004	SW01 virophages	Maveriviricetes;Priklausovirales;Dishuiviroviridae	10.1128/jvi.02114-21
Dishui_Lake_viropahge_2	MN940570.1	NCBI Nucleotide database (Lavidaviridae)	Metagenome	NCBI databases (Oct 2021)	Linear	31238	Seed	Dishui_Lake_viropahge_2	Near-complete	ATPase MCP Penton PRO	Group 001	Aquatic virophages 1	Maveriviricetes;Priklausovirales;Omnilimnoviroviridae	10.1128/JVI.00149-20
Dishui_Lake_viropahge_3	MN940572.1	NCBI Nucleotide database (Lavidaviridae)	Metagenome	NCBI databases (Oct 2021)	Linear	31512	Seed	Dishui_Lake_viropahge_3	Near-complete	ATPase MCP Penton PRO	Group 004	SW01 virophages	Maveriviricetes;Priklausovirales;Dishuiviroviridae	10.1128/JVI.00149-20
Dishui_Lake_viropahge_4	MN940571.1	NCBI Nucleotide database (Lavidaviridae)	Metagenome	NCBI databases (Oct 2021)	Linear	30873	Seed	Dishui_Lake_viropahge_4	Near-complete	ATPase MCP Penton PRO	Group 004	SW01 virophages	Maveriviricetes;Priklausovirales;Dishuiviroviridae	10.1128/JVI.00149-20
Dishui_Lake_viropahge_5	MN940574.1	NCBI Nucleotide database (Lavidaviridae)	Metagenome	NCBI databases (Oct 2021)	Linear	26593	Clustered	Dishui_Lake_viropahge_8	NA	NA	NA	NA	NA	10.1128/JVI.00149-20
Dishui_Lake_viropahge_6	MN940573.1	NCBI Nucleotide database (Lavidaviridae)	Metagenome	NCBI databases (Oct 2021)	Linear	28714	Seed	Dishui_Lake_viropahge_6	Near-complete	ATPase MCP Penton PRO	Group 004	SW01 virophages	Maveriviricetes;Priklausovirales;Dishuiviroviridae	10.1128/JVI.00149-20
Dishui_Lake_viropahge_7	MN940576.1	NCBI Nucleotide database (Lavidaviridae)	Metagenome	NCBI databases (Oct 2021)	Linear	29961	Seed	Dishui_Lake_viropahge_7	Near-complete	ATPase MCP Penton PRO	Group 004	SW01 virophages	Maveriviricetes;Priklausovirales;Dishuiviroviridae	10.1128/JVI.00149-20
Dishui_Lake_viropahge_8	MN940575.1	NCBI Nucleotide database (Lavidaviridae)	Metagenome	NCBI databases (Oct 2021)	Linear	26605	Seed	Dishui_Lake_viropahge_8	Near-complete	ATPase MCP Penton PRO	Group 004	SW01 virophages	Maveriviricetes;Priklausovirales;Dishuiviroviridae	10.1128/JVI.00149-20
Dishui_lake_virophage_1	KT894027.1	NCBI Nucleotide database (Lavidaviridae)	Metagenome	NCBI databases (Oct 2021)	Linear	28788	Clustered	Dishui_Lake_viropahge_7	NA	NA	NA	NA	NA	10.3389/fmicb.2016.00005
Guarani_virophage_genome_assembly	LS999520.1	NCBI Nucleotide database (Lavidaviridae)	Metagenome	NCBI databases (Oct 2021)	Linear	18967	Clustered	Sputnik_virophage_3	NA	NA	NA	NA	NA	10.3389/fmicb.2019.01003
Maverick-related_virus_strain_Spezl	HQ712116.1	NCBI Nucleotide database (Lavidaviridae)	Isolate	NCBI databases (Oct 2021)	Isolate	19063	Seed	Maverick-related_virus_strain_Spezl	Complete	ATPase MCP Penton PRO	Group 006	Mavirus virophages	Maveriviricetes;Lavidavirales;Maviroviridae	10.1126/science.1199412
Organic_Lake_virophage	HQ704801.1	NCBI Nucleotide database (Lavidaviridae)	Metagenome	NCBI databases (Oct 2021)	Linear	26421	Seed	Organic_Lake_virophage	Near-complete	ATPase MCP Penton PRO	Group 001	Aquatic virophages 1	Maveriviricetes;Priklausovirales;Omnilimnoviroviridae	10.1073/pnas.1018221108
Qinghai_Lake_virophage	KJ854379.1	NCBI Nucleotide database (Lavidaviridae)	Metagenome	NCBI databases (Oct 2021)	DTR	23379	Seed	Qinghai_Lake_virophage	Complete	ATPase MCP Penton PRO	Group 001	Aquatic virophages 1	Maveriviricetes;Priklausovirales;Omnilimnoviroviridae	10.1264/jsme2.ME16003
Sputnik_virophage	EU606015.1	NCBI Nucleotide database (Lavidaviridae)	Isolate	NCBI databases (Oct 2021)	Linear	18343	Clustered	Sputnik_virophage_3	NA	NA	NA	NA	NA	10.1038/nature07218
Sputnik_virophage_2	JN603369.1	NCBI Nucleotide database (Lavidaviridae)	Isolate	NCBI databases (Oct 2021)	Linear	18338	Clustered	Sputnik_virophage_3	NA	NA	NA	NA	NA	10.1073/pnas.1208835109 10.1371/journal.pone.0061912
Sputnik_virophage_2_isolate_Rio_Negro	MG676470.1	NCBI Nucleotide database (Lavidaviridae)	Isolate	NCBI databases (Oct 2021)	Linear	18145	Clustered	Sputnik_virophage_3	NA	NA	NA	NA	NA	10.1016/j.bjm.2018.07.003
Sputnik_virophage_3	JN603370.1	NCBI Nucleotide database (Lavidaviridae)	Isolate	NCBI databases (Oct 2021)	Isolate	18338	Seed	Sputnik_virophage_3	Complete	ATPase MCP Penton PRO	Group 002	Sputnik virophages	Maveriviricetes;Mividavirales;Sputniviroviridae	10.1371/journal.pone.0061912
Yellowstone_Lake_virophage_5	KM502589.1	NCBI Nucleotide database (Lavidaviridae)	Metagenome	NCBI databases (Oct 2021)	Linear	29767	Seed	Yellowstone_Lake_virophage_5	Near-complete	ATPase MCP Penton PRO	Group 003	Aquatic virophages 2	Maveriviricetes;Priklausovirales;Burtonviroviridae	10.1128/JVI.03039-14
Yellowstone_Lake_virophage_6	KM502590.1	NCBI Nucleotide database (Lavidaviridae)	Metagenome	NCBI databases (Oct 2021)	Linear	24837	Seed	Yellowstone_Lake_virophage_6	Near-complete	ATPase MCP Penton PRO	Group 001	Aquatic virophages 1	Maveriviricetes;Priklausovirales;Omnilimnoviroviridae	10.1128/JVI.03039-14
Yellowstone_Lake_virophage_7	KM502591.1	NCBI Nucleotide database (Lavidaviridae)	Metagenome	NCBI databases (Oct 2021)	DTR	23193	Seed	Yellowstone_Lake_virophage_7	Complete	ATPase MCP Penton PRO	Group 001	NA	Maveriviricetes;Unclassified	10.1128/JVI.03039-14
Zamilon_virophage	HG531932.1	NCBI Nucleotide database (Lavidaviridae)	Isolate	NCBI databases (Oct 2021)	Linear	17276	Clustered	Zamilon_virus_isolate_Z.vigne	NA	NA	NA	NA	NA	10.1371/journal.pone.0094923
Zamilon_virus_isolate_Z.vigne	MG807318.2	NCBI Nucleotide database (Lavidaviridae)	Isolate	NCBI databases (Oct 2021)	Isolate	17327	Seed	Zamilon_virus_isolate_Z.vigne	Complete	ATPase MCP Penton PRO	Group 002	Sputnik virophages	Maveriviricetes;Mividavirales;Sputniviroviridae	10.1038/s41396-019-0565-y
PE_001	2049941000_____900MB_Assembly_NODE_1040084_len_12349_cov_10_692930	Paez-Espino_2019	Metagenome	2049941000	Linear	12399	Seed	PE_001	Partial	ATPase MCP PRO	NA	NA	Maveriviricetes;Divpevirales;Ruviroviridae	10.1126/science.1200387 10.1186/s40168-019-0768-5
PE_002	2049941000_____900MB_Assembly_NODE_1042561_len_26598_cov_4_260283	Paez-Espino_2019	Metagenome	2049941000	Linear	26648	Seed	PE_002	Near-complete	ATPase MCP PRO	Group 007	Rumen virophages	Maveriviricetes;Divpevirales;Ruviroviridae	10.1126/science.1200387 10.1186/s40168-019-0768-5
PE_003	2061766007_____rumenHiSeq_NODE_2232599_len_27724_cov_4_336964	Paez-Espino_2019	Metagenome	2061766007	Linear	27774	Seed	PE_003	Near-complete	ATPase MCP PRO	Group 007	Rumen virophages	Maveriviricetes;Divpevirales;Ruviroviridae	10.1126/science.1200387 10.1186/s40168-019-0768-5
PE_004	2061766007_____rumenHiSeq_NODE_3553059_len_27487_cov_0_981810	Paez-Espino_2019	Metagenome	2061766007	Linear	27537	Seed	PE_004	Near-complete	ATPase MCP PRO	Group 007	Rumen virophages	Maveriviricetes;Divpevirales;Ruviroviridae	10.1126/science.1200387 10.1186/s40168-019-0768-5
PE_005	2061766007_____rumenHiSeq_NODE_4331347_len_22405_cov_0_883553	Paez-Espino_2019	Metagenome	2061766007	Linear	22455	Seed	PE_005	Partial	ATPase MCP PRO	NA	NA	Maveriviricetes;Divpevirales;Ruviroviridae	10.1126/science.1200387 10.1186/s40168-019-0768-5
PE_006	3300000090_____WSSedB1C_c10000817	Paez-Espino_2019	Metagenome	3300000090	Linear	12744	Clustered	IMG_VR_0019	NA	NA	NA	NA	NA	10.1128/mBio.00066-15 10.1186/s40168-019-0768-5
PE_007	3300000502_____M590M2_1006461	Paez-Espino_2019	Metagenome	3300000502	Linear	18023	Clustered	IMG_VR_0029	NA	NA	NA	NA	NA	10.1186/s40168-019-0768-5
PE_008	3300000553_____TBL_comb47_HYPODRAFT_10007071	Paez-Espino_2019	Metagenome	3300000553	Linear	11920	Clustered	IMG_VR_0038	NA	NA	NA	NA	NA	10.1038/ismej.2015.241 10.1186/s40168-019-0768-5 10.7717/peerj.6075
PE_009	3300001097_____JGIcombinedJ13537_10000434	Paez-Espino_2019	Metagenome	3300001097	Linear	19123	Seed	PE_009	Near-complete	ATPase MCP Penton PRO	Group 002	Sputnik virophages	Maveriviricetes;Mividavirales;Sputniviroviridae	10.1186/s40168-019-0768-5	10.46936/10.25585/60000603
PE_010	3300001605_____Draft_10001555	Paez-Espino_2019	Metagenome	3300001605	Linear	30393	Clustered	IMG_VR_0052	NA	NA	NA	NA	NA	10.1021/es4020184 10.1186/s40168-019-0768-5
PE_011	3300001605_____Draft_10009362	Paez-Espino_2019	Metagenome	3300001605	Linear	10452	Clustered	IMG_VR_0054	NA	NA	NA	NA	NA	10.1021/es4020184 10.1186/s40168-019-0768-5
PE_012	3300001687_____WOR8_10002702	Paez-Espino_2019	Metagenome	3300001687	Linear	20758	Clustered	IMG_VR_1326	NA	NA	NA	NA	NA	10.1186/s40168-019-0768-5
PE_013	3300001798_____JGI24126J20157_1000438	Paez-Espino_2019	Metagenome	3300001798	Linear	15931	Clustered	MAG_Nitrosarchaeum_sp._isolate_CROMO_BS_83_3_0_c_000000707256	NA	NA	NA	NA	NA	10.1186/s40168-019-0768-5	10.46936/10.25585/60007411
PE_014	3300002091_____JGI24028J26656_1000152	Paez-Espino_2019	Metagenome	3300002091	DTR	29217	Clustered	IMG_VR_0058	NA	NA	NA	NA	NA	10.1128/mSphere.00202-18 10.1186/s40168-019-0768-5	10.46936/10.25585/60000619
PE_015	3300002091_____JGI24028J26656_1000154	Paez-Espino_2019	Metagenome	3300002091	Linear	29963	Clustered	IMG_VR_0059	NA	NA	NA	NA	NA	10.1128/mSphere.00202-18 10.1186/s40168-019-0768-5	10.46936/10.25585/60000619
PE_016	3300002092_____JGI24218J26658_1000290	Paez-Espino_2019	Metagenome	3300002092	Linear	29392	Clustered	IMG_VR_0064	NA	NA	NA	NA	NA	10.1128/mSphere.00202-18 10.1186/s40168-019-0768-5	10.46936/10.25585/60000619
PE_017	3300002092_____JGI24218J26658_1000335	Paez-Espino_2019	Metagenome	3300002092	Linear	26263	Clustered	IMG_VR_0065	NA	NA	NA	NA	NA	10.1128/mSphere.00202-18 10.1186/s40168-019-0768-5	10.46936/10.25585/60000619
PE_018	3300002098_____JGI24219J26650_1000491	Paez-Espino_2019	Metagenome	3300002098	Linear	16193	Clustered	IMG_VR_0076	NA	NA	NA	NA	NA	10.1128/mSphere.00202-18 10.1186/s40168-019-0768-5	10.46936/10.25585/60000619
PE_019	3300002098_____JGI24219J26650_1000581	Paez-Espino_2019	Metagenome	3300002098	Linear	14247	Clustered	IMG_VR_0077	NA	NA	NA	NA	NA	10.1128/mSphere.00202-18 10.1186/s40168-019-0768-5	10.46936/10.25585/60000619
PE_020	3300002307_____JGI24890J29729_1000225	Paez-Espino_2019	Metagenome	3300002307	DTR	23742	Seed	PE_020	Complete	ATPase MCP Penton PRO	Group 003	Aquatic virophages 2	Maveriviricetes;Priklausovirales;Burtonviroviridae	10.1128/mSphere.00202-18 10.1186/s40168-019-0768-5	10.46936/10.25585/60000619
PE_021	3300002307_____JGI24890J29729_1000442	Paez-Espino_2019	Metagenome	3300002307	Linear	26375	Clustered	IMG_VR_0086	NA	NA	NA	NA	NA	10.1128/mSphere.00202-18 10.1186/s40168-019-0768-5	10.46936/10.25585/60000619
PE_022	3300002307_____JGI24890J29729_1000451	Paez-Espino_2019	Metagenome	3300002307	DTR	26086	Seed	PE_022	Complete	ATPase MCP Penton PRO	Group 001	Aquatic virophages 1	Maveriviricetes;Priklausovirales;Omnilimnoviroviridae	10.1128/mSphere.00202-18 10.1186/s40168-019-0768-5	10.46936/10.25585/60000619
PE_023	3300002307_____JGI24890J29729_1000626	Paez-Espino_2019	Metagenome	3300002307	Linear	20771	Clustered	IMG_VR_0088	NA	NA	NA	NA	NA	10.1128/mSphere.00202-18 10.1186/s40168-019-0768-5	10.46936/10.25585/60000619
PE_024	3300002307_____JGI24890J29729_1000627	Paez-Espino_2019	Metagenome	3300002307	Linear	20761	Clustered	IMG_VR_0089	NA	NA	NA	NA	NA	10.1128/mSphere.00202-18 10.1186/s40168-019-0768-5	10.46936/10.25585/60000619
PE_025	3300002307_____JGI24890J29729_1000652	Paez-Espino_2019	Metagenome	3300002307	Linear	20233	Clustered	IMG_VR_0090	NA	NA	NA	NA	NA	10.1128/mSphere.00202-18 10.1186/s40168-019-0768-5	10.46936/10.25585/60000619
PE_026	3300002307_____JGI24890J29729_1000712	Paez-Espino_2019	Metagenome	3300002307	Linear	18899	Clustered	IMG_VR_0091	NA	NA	NA	NA	NA	10.1128/mSphere.00202-18 10.1186/s40168-019-0768-5	10.46936/10.25585/60000619
PE_027	3300002466_____JGI10211J34971_10003389	Paez-Espino_2019	Metagenome	3300002466	Linear	12781	Seed	PE_027	Partial	ATPase MCP Penton PRO	NA	NA	Maveriviricetes;Mividavirales;Sputniviroviridae	10.1186/s40168-019-0768-5
PE_028	3300002835_____B570J40625_100003451	Paez-Espino_2019	Metagenome	3300002835	Linear	29610	Clustered	IMG_VR_0101	NA	NA	NA	NA	NA	10.1186/s40168-019-0768-5 10.7717/peerj.6075	10.46936/10.25585/60000533
PE_029	3300002835_____B570J40625_100004419	Paez-Espino_2019	Metagenome	3300002835	DTR	25756	Clustered	IMG_VR_0102	NA	NA	NA	NA	NA	10.1186/s40168-019-0768-5 10.7717/peerj.6075	10.46936/10.25585/60000533
PE_030	3300002835_____B570J40625_100004931	Paez-Espino_2019	Metagenome	3300002835	Linear	24917	Clustered	IMG_VR_0103	NA	NA	NA	NA	NA	10.1186/s40168-019-0768-5 10.7717/peerj.6075	10.46936/10.25585/60000533
PE_031	3300002835_____B570J40625_100005612	Paez-Espino_2019	Metagenome	3300002835	DTR	22900	Clustered	IMG_VR_0104	NA	NA	NA	NA	NA	10.1186/s40168-019-0768-5 10.7717/peerj.6075	10.46936/10.25585/60000533
PE_032	3300002835_____B570J40625_100005780	Paez-Espino_2019	Metagenome	3300002835	Linear	23012	Clustered	IMG_VR_0105	NA	NA	NA	NA	NA	10.1186/s40168-019-0768-5 10.7717/peerj.6075	10.46936/10.25585/60000533
PE_033	3300002835_____B570J40625_100006212	Paez-Espino_2019	Metagenome	3300002835	Linear	22196	Clustered	IMG_VR_0106	NA	NA	NA	NA	NA	10.1186/s40168-019-0768-5 10.7717/peerj.6075	10.46936/10.25585/60000533
PE_034	3300002835_____B570J40625_100006411	Paez-Espino_2019	Metagenome	3300002835	DTR	20751	Clustered	IMG_VR_0107	NA	NA	NA	NA	NA	10.1186/s40168-019-0768-5 10.7717/peerj.6075	10.46936/10.25585/60000533
PE_035	3300003375_____JGI26470J50227_1000268	Paez-Espino_2019	Metagenome	3300003375	Linear	22961	Clustered	IMG_VR_1118	NA	NA	NA	NA	NA	10.1128/mSphere.00202-18 10.1186/s40168-019-0768-5	10.46936/10.25585/60000619
PE_036	3300003432_____JGI20214J51088_10000979	Paez-Espino_2019	Metagenome	3300003432	Linear	19402	Seed	PE_036	Near-complete	ATPase MCP Penton PRO	Group 002	Sputnik virophages	Maveriviricetes;Mividavirales;Sputniviroviridae	10.1186/s40168-019-0768-5	10.46936/10.25585/60000751
PE_037	3300003785_____Ga0007851_100001	Paez-Espino_2019	Metagenome	3300003785	DTR	26677	Clustered	IMG_VR_0265	NA	NA	NA	NA	NA	10.1186/s40168-019-0768-5	10.46936/10.25585/60000543
PE_038	3300003820_____Ga0007863_1000046	Paez-Espino_2019	Metagenome	3300003820	Linear	20321	Clustered	IMG_VR_1182	NA	NA	NA	NA	NA	10.1186/s40168-019-0768-5	10.46936/10.25585/60000543
PE_039	3300003852_____Ga0031655_10000867	Paez-Espino_2019	Metagenome	3300003852	Linear	18601	Clustered	IMG_VR_1318	NA	NA	NA	NA	NA	10.1186/s40168-019-0768-5	10.46936/10.25585/60000572
PE_040	3300003852_____Ga0031655_10001695	Paez-Espino_2019	Metagenome	3300003852	Linear	13068	Clustered	IMG_VR_0146	NA	NA	NA	NA	NA	10.1186/s40168-019-0768-5	10.46936/10.25585/60000572
PE_041	3300004770_____Ga0007804_1000288	Paez-Espino_2019	Metagenome	3300004770	Linear	19632	Clustered	IMG_VR_0161	NA	NA	NA	NA	NA	10.1186/s40168-019-0768-5	10.46936/10.25585/60000543
PE_042	3300004806_____Ga0007854_10000594	Paez-Espino_2019	Metagenome	3300004806	Linear	23263	Clustered	IMG_VR_0165	NA	NA	NA	NA	NA	10.1186/s40168-019-0768-5	10.46936/10.25585/60000543
PE_043	3300004806_____Ga0007854_10001399	Paez-Espino_2019	Metagenome	3300004806	Linear	15305	Clustered	IMG_VR_0166	NA	NA	NA	NA	NA	10.1186/s40168-019-0768-5	10.46936/10.25585/60000543
PE_044	3300004807_____Ga0007809_10000095	Paez-Espino_2019	Metagenome	3300004807	Linear	33842	Clustered	IMG_VR_0171	NA	NA	NA	NA	NA	10.1186/s40168-019-0768-5	10.46936/10.25585/60000543
PE_045	3300004807_____Ga0007809_10000678	Paez-Espino_2019	Metagenome	3300004807	Linear	14277	Clustered	IMG_VR_0173	NA	NA	NA	NA	NA	10.1186/s40168-019-0768-5	10.46936/10.25585/60000543
PE_046	3300005119_____Ga0070420_1191	Paez-Espino_2019	Metagenome	3300005119	Linear	10614	Clustered	IMG_VR_0179	NA	NA	NA	NA	NA	10.1186/s40168-019-0768-5	10.46936/10.25585/60000917
PE_047	3300005437_____Ga0070710_10000143	Paez-Espino_2019	Metagenome	3300005437	Linear	33080	Seed	PE_047	Near-complete	ATPase MCP Penton PRO	NA	NA	Maveriviricetes;Unclassified	10.1186/s40168-019-0768-5	10.46936/10.25585/60000745
PE_048	3300005512_____Ga0074648_1003932	Paez-Espino_2019	Metagenome	3300005512	Linear	12221	Seed	PE_048	Partial	ATPase MCP Penton PRO	NA	NA	Maveriviricetes;Mividavirales;Sputniviroviridae	10.1186/s40168-019-0768-5
PE_049	3300005512_____Ga0074648_1005201	Paez-Espino_2019	Metagenome	3300005512	Linear	10078	Seed	PE_049	Partial	ATPase MCP Penton PRO	NA	NA	Maveriviricetes;Mividavirales;Sputniviroviridae	10.1186/s40168-019-0768-5
PE_050	3300005527_____Ga0068876_10000772	Paez-Espino_2019	Metagenome	3300005527	Linear	25701	Clustered	IMG_VR_1306	NA	NA	NA	NA	NA	10.1186/s40168-019-0768-5	10.46936/10.25585/60000686
PE_051	3300005529_____Ga0070741_10016518	Paez-Espino_2019	Metagenome	3300005529	Linear	12291	Clustered	IMG_VR_0191	NA	NA	NA	NA	NA	10.1038/s41564-018-0276-6 10.1186/s40168-019-0768-5	10.46936/10.25585/60007659
PE_052	3300005534_____Ga0070735_10004409	Paez-Espino_2019	Metagenome	3300005534	Linear	11889	Clustered	IMG_VR_0192	NA	NA	NA	NA	NA	10.1038/s41564-018-0276-6 10.1186/s40168-019-0768-5	10.46936/10.25585/60007659
PE_053	3300005534_____Ga0070735_10005036	Paez-Espino_2019	Metagenome	3300005534	Linear	11022	Clustered	IMG_VR_0193	NA	NA	NA	NA	NA	10.1038/s41564-018-0276-6 10.1186/s40168-019-0768-5	10.46936/10.25585/60007659
PE_054	3300005541_____Ga0070733_10002713	Paez-Espino_2019	Metagenome	3300005541	Linear	12365	Clustered	IMG_VR_0194	NA	NA	NA	NA	NA	10.1038/s41564-018-0276-6 10.1186/s40168-019-0768-5	10.46936/10.25585/60007659
PE_055	3300005581_____Ga0049081_10000427	Paez-Espino_2019	Metagenome	3300005581	Linear	16107	Clustered	IMG_VR_0196	NA	NA	NA	NA	NA	10.1186/s40168-019-0768-5	10.46936/10.25585/60000574
PE_056	3300005581_____Ga0049081_10000462	Paez-Espino_2019	Metagenome	3300005581	Linear	15545	Clustered	IMG_VR_0197	NA	NA	NA	NA	NA	10.1186/s40168-019-0768-5	10.46936/10.25585/60000574
PE_057	3300005581_____Ga0049081_10000582	Paez-Espino_2019	Metagenome	3300005581	Linear	14066	Clustered	IMG_VR_0198	NA	NA	NA	NA	NA	10.1186/s40168-019-0768-5	10.46936/10.25585/60000574
PE_058	3300005582_____Ga0049080_10000091	Paez-Espino_2019	Metagenome	3300005582	DTR	26913	Clustered	IMG_VR_0200	NA	NA	NA	NA	NA	10.1186/s40168-019-0768-5	10.46936/10.25585/60000574
[truncated: 318 more rows]
