# Supplementary material for: Updated Virophage Taxonomy and Distinction from Polinton-like Viruses
Source: Biomolecules. 2023 Jan 19;13(2):204. doi: 10.3390/biom13020204 (PMC9952930; doi:10.3390/biom13020204)
Supplement: Supplementary file 1 [file biomolecules-13-00204-s001.zip › Virophage_Table_S2.xlsx]

## Sheet: Sheet1
Group	Minimum blastp score
Sputnik virophages	245
Mavirus virophages	150
Rumen virophages	150
Aquatic virophages 1	300
Aquatic virophages 2	350
SW01 virophages	310
Large virophages	250
