# Supplementary material for: Updated Virophage Taxonomy and Distinction from Polinton-like Viruses
Source: Biomolecules. 2023 Jan 19;13(2):204. doi: 10.3390/biom13020204 (PMC9952930; doi:10.3390/biom13020204)
Supplement: Supplementary file 1 [file biomolecules-13-00204-s001.zip › Virophage_Table_S3.xlsx]

## Sheet: Gossenköllesee
Genome	Assignation (Class;Family)	Maveriviricetes marker list
MAVIRUS-V435K_contig_2371_len_30443_bp	Maveriviricetes;Unclassified	ATPase MCP Penton adenain
MAVIRUS-V563K_contig_987_len_40613_bp	Maveriviricetes;Unclassified	ATPase MCP Penton adenain
NODE_2992_length_16513_cov_1029.516549_Copy	NA	NA
NODE_2993_length_16512_cov_439.614420_Copy	Possible_PLV	NA
NODE_3799_length_14001_cov_3025.913531	NA	NA
NODE_484_length_41135_cov_40.315237_gene	NA	NA
PLV_GKS2643_reassembled	Possible_PLV	NA
V423K_contig_265_len_26963_bp_reassembly	Maveriviricetes;Priklausovirales;Burtonviroviridae	ATPase MCP Penton adenain
V423K_contig_45_len_16490_bp_extraction	NA	NA
V423K_contig_5898_len_29290_bp	Maveriviricetes;Priklausovirales;Gulliviroviridae	ATPase MCP Penton adenain
V423K_contig_697_len_22047_bp	Possible_PLV	NA
V423K_contig_7287_len_14930_bp	NA	NA
V435K_contig_12014_len_19172_bp	Possible_PLV	NA
V435K_contig_13193_len_24085_bp	Possible_PLV	NA
V463K_contig_1033_len_17616_bp	Possible_PLV	NA
V463K_contig_1061_len_12396_bp	Possible_PLV	NA
V463K_contig_10965_len_16623_bp_reassembly	Possible_PLV	NA
V463K_contig_346_len_10035_bp	NA	NA
V463K_contig_686_len_19667_bp	Possible_PLV	NA
V463K_contig_973_len_14555_bp	Maveriviricetes;Unclassified	ATPase MCP
V4ALL_NODE_1113_length_21657_cov_20.004463	Possible_PLV	NA
V4ALL_NODE_1192_length_20580_cov_5.091206	Possible_PLV	NA
V4ALL_NODE_1221_length_20148_cov_6.666982	Possible_PLV	NA
V4ALL_NODE_1269_length_19493_cov_6.272250	NA	NA
V4ALL_NODE_1270_length_19492_cov_7.065259	Possible_PLV	NA
V4ALL_NODE_1420_length_17833_cov_108.702523	Possible_PLV	NA
V4ALL_NODE_1480_length_17327_cov_26.887942	NA	NA
V4ALL_NODE_1510_length_17081_cov_6.256998	NA	NA
V4ALL_NODE_1511_length_17076_cov_5.564916	Possible_PLV	NA
V4ALL_NODE_1541_length_16908_cov_12.841661	Possible_PLV	NA
V4ALL_NODE_1584_length_16531_cov_14.819375	NA	NA
V4ALL_NODE_1889_length_14479_cov_5.927441	Possible_PLV	NA
V4ALL_NODE_1987_length_13951_cov_5.319663	Maveriviricetes;Unclassified	ATPase MCP Penton adenain
V4ALL_NODE_2574_length_11388_cov_4.267792	Possible_PLV	NA
V4ALL_NODE_2866_length_10526_cov_71.019332	NA	NA
V4ALL_NODE_997_length_23648_cov_22.150397	Possible_PLV	NA
V4MERGE_NODE_1045_length_22796_cov_61.486157	Possible_PLV	NA
V4MERGE_NODE_1152_length_21150_cov_8.703080	Maveriviricetes;Unclassified	ATPase MCP Penton adenain
V4MERGE_NODE_1198_length_20430_cov_12.532354	Possible_PLV	NA
V4MERGE_NODE_1252_length_19796_cov_43.950251_extraction	NA	NA
V4MERGE_NODE_1403_length_18081_cov_7.104032_extraction	Possible_PLV	NA
V4MERGE_NODE_1516_length_17050_cov_10.739351	Possible_PLV	NA
V4MERGE_NODE_1564_length_16675_cov_42.268466	NA	NA
V4MERGE_NODE_1925_length_14312_cov_106.038707	Maveriviricetes;Mividavirales;Sputniviroviridae	ATPase MCP Penton adenain
V4MERGE_NODE_3020_length_10138_cov_7.024053	Maveriviricetes;Mividavirales;Sputniviroviridae	ATPase MCP Penton adenain
V523K_contig_1246_len_30098_bp_reassembly	Maveriviricetes;Priklausovirales;Burtonviroviridae	ATPase MCP Penton adenain
V523K_contig_149122_len_17919_bp	Possible_PLV	NA
V523K_contig_1566_len_22484_bp_reassembly	Maveriviricetes;Priklausovirales;Burtonviroviridae	ATPase MCP Penton
V523K_contig_168304_len_21489_bp	Possible_PLV	NA
V523K_contig_18194_len_15853_bp_extraction	NA	NA
V523K_contig_27811_len_17318_bp_2	NA	NA
V523K_contig_48508_len_13849_bp	NA	NA
V523K_contig_49807_len_27786_bp_reassembly	Maveriviricetes;Priklausovirales;Burtonviroviridae	ATPase MCP Penton adenain
V535K_contig_1106_len_28229_bp-reassembly	Maveriviricetes;Priklausovirales;Burtonviroviridae	ATPase MCP Penton adenain
V535K_contig_1157_len_12643_bp	Possible_PLV	NA
V535K_contig_128176_len_21740_bp	Possible_PLV	NA
V535K_contig_1301_len_16316_bp_extraction	Possible_PLV	NA
V535K_contig_1478_len_19938_bp_extraction	Possible_PLV	NA
V535K_contig_1551_len_20355_bp	Possible_PLV	NA
V535K_contig_207126_len_12215_bp_extraction	NA	NA
V535K_contig_21559_len_18608_bp	Maveriviricetes;Unclassified	ATPase MCP Penton adenain
V535K_contig_2415_len_15430_bp_Copy	Possible_PLV	NA
V535K_contig_30191_len_14243_bp	Possible_PLV	NA
V535K_contig_536_len_16491_bp	Possible_PLV	NA
V535K_contig_56182_len_21109_bp	Possible_PLV	NA
V535K_contig_659_len_17032_bp_reassembly	NA	NA
V535K_contig_7044_len_23790_bp	NA	NA
V535K_contig_8_len_15243_bp	Possible_PLV	NA
V563K_contig_1438_len_13919_bp	Possible_PLV	NA
V563K_contig_1647_len_20342_bp	Possible_PLV	NA
V563K_contig_1829_len_22378_bp	Possible_PLV	NA
V563K_contig_18510_len_17205_bp	Possible_PLV	NA
V563K_contig_2435_len_19753_bp_Cop_2	Possible_PLV	NA
V563K_contig_257297_len_16743_bp	Maveriviricetes;Mividavirales;Sputniviroviridae	ATPase MCP Penton adenain
V563K_contig_2649_len_18544_bp_extraction	NA	NA
V563K_contig_3950_len_16609_bp	Possible_PLV	NA
V563K_contig_419_len_17751_bp	Possible_PLV	NA
V563K_contig_4914_len_14405_bp	Possible_PLV	NA
V563K_contig_5171_len_33710_bp	Maveriviricetes;Unclassified	ATPase MCP Penton adenain
V563K_contig_672_len_21837_bp	NA	NA
V563K_contig_681_len_23708_bp	Possible_PLV	NA
V563K_contig_714_len_26400_bp	Possible_PLV	NA
V563K_contig_720_len_17453_bp	Possible_PLV	NA
V563K_contig_8723_len_16581_bp	NA	NA
V563K_contig_89538_len_18490_bp	Maveriviricetes;Mividavirales;Sputniviroviridae	ATPase MCP Penton adenain
V5ALL_V563K_contig_844_len_17296_bp_reassembly	NA	NA
V5MERGE_NODE_1268_length_29411_cov_4.093339	Maveriviricetes;Unclassified	ATPase MCP Penton adenain
V5MERGE_NODE_1534_length_25974_cov_5.290536	Possible_PLV	NA
V5MERGE_NODE_1643_length_24827_cov_4.985859_reassembly	Maveriviricetes;Priklausovirales;Burtonviroviridae	ATPase MCP Penton adenain
V5MERGE_NODE_1662_length_24653_cov_7.767253_reassembly	Maveriviricetes;Priklausovirales;Dishuiviroviridae	ATPase MCP Penton adenain
V5MERGE_NODE_1851_length_23004_cov_214.224277	Possible_PLV	NA
V5MERGE_NODE_2092_length_21202_cov_3.25268	Maveriviricetes;Mividavirales;Sputniviroviridae	ATPase MCP Penton adenain
V5MERGE_NODE_2280_length_19890_cov_790.912179_quick	Maveriviricetes;Priklausovirales;Omnilimnoviroviridae	ATPase MCP Penton adenain
V5MERGE_NODE_2435_length_18975_cov_8.443274	NA	NA
V5MERGE_NODE_2555_length_18287_cov_4.135255	Maveriviricetes;Priklausovirales;Burtonviroviridae	ATPase MCP Penton adenain
V5MERGE_NODE_2701_length_17699_cov_5.727329	Possible_PLV	NA
V5MERGE_NODE_2767_length_17433_cov_7.389894	Possible_PLV	NA
V5MERGE_NODE_2825_length_17198_cov_2.583961	Maveriviricetes;Priklausovirales;Burtonviroviridae	MCP Penton adenain
V5MERGE_NODE_2996_length_16497_cov_2.562424	Maveriviricetes;Mividavirales;Sputniviroviridae	MCP Penton adenain
V5MERGE_NODE_3031_length_16351_cov_141.015116	Possible_PLV	NA
V5MERGE_NODE_3172_length_15896_cov_13.870852	Possible_PLV	NA
V5MERGE_NODE_3395_length_15144_cov_8.387469	Possible_PLV	NA
V5MERGE_NODE_3530_length_14731_cov_3.681657	Maveriviricetes;Mividavirales;Sputniviroviridae	ATPase MCP Penton adenain
V5MERGE_NODE_3605_length_14509_cov_5.505759	Maveriviricetes;Unclassified	ATPase MCP Penton adenain
V5MERGE_NODE_3676_length_14325_cov_4.933675	NA	NA
V5MERGE_NODE_4276_length_12852_cov_2.321096	Maveriviricetes;Unclassified	ATPase MCP Penton adenain
V5MERGE_NODE_4400_length_12565_cov_4.013133	Maveriviricetes;Unclassified	ATPase MCP Penton adenain
V5MERGE_NODE_4588_length_12216_cov_17.769668	Maveriviricetes;Mividavirales;Sputniviroviridae	MCP
V5MERGE_NODE_4612_length_12185_cov_11.431285	Possible_PLV	NA
V5MERGE_NODE_4719_length_12003_cov_59.970820	Possible_PLV	NA
V5MERGE_NODE_4893_length_11716_cov_4.081966	NA	NA
V5MERGE_NODE_5471_length_10806_cov_3.964862	NA	NA
V5MERGE_NODE_5914_length_10230_cov_3.014183	Maveriviricetes;Mividavirales;Sputniviroviridae	ATPase MCP Penton adenain
V5MERGE_NODE_5991_length_10121_cov_6.226105	NA	NA

## Sheet: Adintoviruses
Genome	Assignation (Class;Order;Family if virophage)	Maveriviricetes marker list
BK012045.1	Maveriviricetes;Divpevirales;Ruviroviridae	ATPase MCP adenain
BK012061.1	Maveriviricetes;Divpevirales;Ruviroviridae	ATPase MCP Penton* adenain
BK057806.1	Maveriviricetes;Divpevirales;Ruviroviridae	ATPase MCP Penton* adenain
BK059143.1	Maveriviricetes;Divpevirales;Ruviroviridae	ATPase MCP Penton adenain
MT496849.1	Maveriviricetes;Unclassified	ATPase MCP Penton adenain
ABRO02087964.1	NA	NA
AC083860.2	NA	NA
BK011001.1	NA	NA
BK011005.1	NA	NA
BK011007.1	NA	NA
BK011008.1	NA	NA
BK011010.1	NA	NA
BK011011.1	NA	NA
BK012043.1	NA	NA
BK012044.1	NA	NA
BK012046.1	NA	NA
BK012051.1	NA	NA
BK012058.1	NA	NA
BK012060.1	NA	NA
BK012062.1	NA	NA
FKYM01057659.1	NA	NA
JRXG01022388.1	NA	NA
NIJJ01055010.1	NA	NA
OOPI01000021.1	NA	NA
PIPH01094194.1	NA	NA
AL110478.2	Possible_PLV	NA
AZBV01015367.1	Possible_PLV	NA
BK010888.1	Possible_PLV	NA
BK010889.1	Possible_PLV	NA
BK010890.1	Possible_PLV	NA
BK010998.1	Possible_PLV	NA
BK010999.1	Possible_PLV	NA
BK011000.1	Possible_PLV	NA
BK011002.1	Possible_PLV	NA
BK011003.1	Possible_PLV	NA
BK011004.1	Possible_PLV	NA
BK011006.1	Possible_PLV	NA
BK011009.1	Possible_PLV	NA
BK011025.1	Possible_PLV	NA
BK011026.1	Possible_PLV	NA
BK012047.1	Possible_PLV	NA
BK012048.1	Possible_PLV	NA
BK012049.1	Possible_PLV	NA
BK012050.1	Possible_PLV	NA
BK012052.1	Possible_PLV	NA
BK012053.1	Possible_PLV	NA
BK012054.1	Possible_PLV	NA
BK012055.1	Possible_PLV	NA
BK012056.1	Possible_PLV	NA
BK012057.1	Possible_PLV	NA
BK012059.1	Possible_PLV	NA
BK012063.1	Possible_PLV	NA
BK012064.1	Possible_PLV	NA
BK012085.1	Possible_PLV	NA
BK012086.1	Possible_PLV	NA
FKYM01057927.1	Possible_PLV	NA
JZLH010489059.1	Possible_PLV	NA
LC027333.1	Possible_PLV	NA
LDKA01017305.1	Possible_PLV	NA
MT496847.1	Possible_PLV	NA
MT496848.1	Possible_PLV	NA
NC_006658.1	Possible_PLV	NA
NKQN01000414.1	Possible_PLV	NA
WHVK01000405.1	Possible_PLV	NA
