# Supplementary material for: Updated Virophage Taxonomy and Distinction from Polinton-like Viruses
Source: Biomolecules. 2023 Jan 19;13(2):204. doi: 10.3390/biom13020204 (PMC9952930; doi:10.3390/biom13020204)
Supplement: Supplementary file 1 [file biomolecules-13-00204-s001.zip › Virophage_Table_S4.xlsx]

## Sheet: Sheet1
Genome	Taxonomy	Source	Sampling site
VLTN01000000	Cafeteria burkhardae (formerly roenbergensis)	Marine	British Virgin Islands
VLTL00000000	Cafeteria burkhardae (formerly roenbergensis)	Marine	Pacific Ocean: south-east off the coast of Chile
VLTM00000000	Cafeteria burkhardae (formerly roenbergensis)	Marine	Atlantic Ocean (Woods Hole, MA)
VLTO00000000	Cafeteria burkhardae (formerly roenbergensis)	Marine	Pacific Ocean:North West Pacific, 5 km West of Yaquina Bay, Oregon
ptAA_0037_lc1_Caecitellus	Caecitellus paraparvulus	Marine	Mediterranean sea (surface water)
ptAF_0024_lc1_Adriamonas	Gymnoeca vivacolonia	Freshwater	Rhein river (Germany)
LKH280_P04_Am	Hyalosphenia elegans	Freshwater	Hawley Bog (Hawley, MA)
LKH316_P04_Am	Hyalosphenia elegans	Freshwater	Hawley Bog (Hawley, MA)
LKH421_P07_C	Loxodes sp.	Freshwater	Hawley Bog (Hawley, MA)
LKH423_P07_Ci	Loxodes sp.	Freshwater	Hawley Bog (Hawley, MA)
LKH424_P07_Ci	Loxodes sp.	Freshwater	Hawley Bog (Hawley, MA)
LKH425_P07_Ci	Loxodes sp.	Freshwater	Hawley Bog (Hawley, MA)
LKH426_P07_Ci	Loxodes sp.	Freshwater	Hawley Bog (Hawley, MA)
LKH565_P11_Ci	Halteria sp.	Freshwater	Orono Bog (Orono, ME)
LKH577_P12_Am	Hyalosphenia elegans	Freshwater	Harvard Forest (MA)
LKH578_P12_Am	Hyalosphenia elegans	Freshwater	Hawley Bog (Hawley, MA)
LKH579_P12_Am	Hyalosphenia elegans	Freshwater	Hawley Bog (Hawley, MA)
LKH580_P12_Am	Hyalosphenia elegans	Freshwater	Hawley Bog (Hawley, MA)
LKH581_P12_Am	Hyalosphenia elegans	Freshwater	Hawley Bog (Hawley, MA)
LKH582_P12_Am	Hyalosphenia elegans	Freshwater	Hawley Bog (Hawley, MA)
LKH583_P13_Ci	Loxodes sp.	Freshwater	Hawley Bog (Hawley, MA)
LKH647_P17_Ci	Halteria sp.	Freshwater	Orono Bog (Orono, ME)
